# Supplementary material for: Contact-free experimental determination of the static flexural spring constant of cantilever sensors using a microfluidic force tool
Source: publisher site journal article supplement (doi:10.3762/bjnano.7.43), 2016-03-30
Supplement: Additional file 1 [file 2190-4286-7-43-S1.zip]

## Supporting information

### Contact-free experimental determination of the static flexural spring constants of cantilever sensors using a microfluidic force tool

John D Parkin and Georg Hähner\*

Address: *EaStCHEM* School of Chemistry, University of St. Andrews, North Haugh,  
St. Andrews, KY16 9ST, UK

Sensitivity factors,  $\sigma_1$ , were determined from force curves as described in the text:

|                                             | RA2   | RC2   | OTESPA | Tap150 | NCHV  | Tap525 | Fastscan-C |
|---------------------------------------------|-------|-------|--------|--------|-------|--------|------------|
| Deflection sensitivity<br>$\sigma_1$ (nm/V) | 150.2 | 158.4 | 150.9  | 111.7  | 256.7 | 134.0  | 73.0       |

#### Raw data files:

File name: RA2um\_perpg2\_h100\_ch120\_offset0\_tune1\_2

File Format: TXT (ASCII)

Description: thermal resonance curve (power spectral density) for RA2

File name: RA2um-2-perpg2\_pvsPD

File Format: LVM (ASCII)

Description: cantilever deflection in V vs pressure applied to microchannel in kPa for RA2

File name: RC2um\_perpg2\_h100\_ch120\_offset0\_tune1\_2

File Format: TXT (ASCII)

Description: thermal resonance curve (power spectral density) for RC2

File name: RC2um-1-perpg2\_pvsPD

File Format: LVM (ASCII)

Description: cantilever deflection in V vs pressure applied to microchannel in kPa for RC2

File name: OTESPA-R3-0-perpg2-h100\_ch100\_offset0\_thermal1\_2

File Format: TXT (ASCII)

Description: thermal resonance curve (power spectral density) for OTESPA

File name: OTESPA-R3-1-perpg2-h100\_ch100\_offset0\_pvsPD

File Format: LVM (ASCII)

Description: cantilever deflection in V vs pressure applied to microchannel in kPa for OTESPA

File name: Tap150A-0-Chip6\_perpg2\_h100\_ch100\_offset0\_Tune1\_1  
File Format: TXT (ASCII)  
Description: thermal resonance curve (power spectral density) for Tap150

File name: Tap150A-1-chip6\_perpg2\_h100\_ch100\_offset0\_pvsPD  
File Format: LVM (ASCII)  
Description: cantilever deflection in V vs pressure applied to microchannel in kPa for Tap150

File name: NCHV-0-Chip3\_perpg2\_h100\_ch100\_offset0\_Tune1\_2\_256\_7nmV  
File Format: TXT (ASCII)  
Description: thermal resonance curve (power spectral density) for NCHV

File name: NCHV-1-chip3\_perpg2\_h100\_ch100\_offset0\_pvsPD  
File Format: LVM (ASCII)  
Description: cantilever deflection in V vs pressure applied to microchannel in kPa for NCHV

File name: Tap525A-0-Chip2\_perpg2\_h100\_ch100\_offset0\_Tune1\_1  
File Format: TXT (ASCII)  
Description: thermal resonance curve (power spectral density) for Tap525

File name: Tap525A-2-chip2\_perpg2\_h100\_ch100\_offset0\_pvsPD  
File Format: LVM (ASCII)  
Description: cantilever deflection in V vs pressure applied to microchannel in kPa for Tap525

File name: perpg2\_h100\_ch100\_FastscanC\_chip10\_Tune1\_1.txt  
File Format: TXT (ASCII)  
Description: thermal resonance curve (power spectral density) for FastscanC

File name: FastscanC-2-chip10\_perpg2\_h100\_ch100\_offset0\_pvsPD.lvm  
File Format: LVM (ASCII)  
Description: cantilever deflection in V vs pressure applied to microchannel in kPa for FastscanC
