# Supplementary material for: Contact-free experimental determination of the static flexural spring constant of cantilever sensors using a microfluidic force tool
Source: Beilstein J Nanotechnol. 2016 Mar 30;7:492–500. doi: 10.3762/bjnano.7.43 (PMC4901535; doi:10.3762/bjnano.7.43)
Supplement: File 1 — Raw data of thermal noise spectra, cantilever deflection under fluid flow, and sensitivity values σ1. [file Beilstein_J_Nanotechnol-07-492-s001.zip]

Archive with 15 entries (15 files):
- Supporting information and raw data/FastscanC-2-chip10_perpg2_h100_ch100_offset0_pvsPD.lvm
- Supporting information and raw data/NCHV-0-Chip3_perpg2_h100_ch100_offset0_Tune1_2_256_7nmV.txt
- Supporting information and raw data/NCHV-1-chip3_perpg2_h100_ch100_offset0_pvsPD.lvm
- Supporting information and raw data/OTESPA-R3-0-perpg2-h100_ch100_offset0_thermal1_2.txt
- Supporting information and raw data/OTESPA-R3-1-perpg2-h100_ch100_offset0_pvsPD.lvm
- Supporting information and raw data/perpg2_h100_ch100_FastscanC_chip10_Tune1_1.txt
- Supporting information and raw data/RA2um_perpg2_h100_ch120_offset0_tune1_2.txt
- Supporting information and raw data/RA2um-2-perpg2_pvsPD.lvm
- Supporting information and raw data/RC2um_perpg2_h100_ch120_offset0_tune1_2.txt
- Supporting information and raw data/RC2um-1-perpg2_pvsPD.lvm
- Supporting information and raw data/Supporting information.pdf
- Supporting information and raw data/Tap150A-0-Chip6_perpg2_h100_ch100_offset0_Tune1_1.txt
- Supporting information and raw data/Tap150A-1-chip6_perpg2_h100_ch100_offset0_pvsPD.lvm
- Supporting information and raw data/Tap525A-0-Chip2_perpg2_h100_ch100_offset0_Tune1_1.txt
- Supporting information and raw data/Tap525A-2-chip2_perpg2_h100_ch100_offset0_pvsPD.lvm
