# Supplementary material for: Contact-free experimental determination of the static flexural spring constant of cantilever sensors using a microfluidic force tool
Source: Beilstein J Nanotechnol. 2016 Mar 30;7:492–500. doi: 10.3762/bjnano.7.43 (PMC4901535; doi:10.3762/bjnano.7.43)
Supplement: File 1 — Raw data of thermal noise spectra, cantilever deflection under fluid flow, and sensitivity values σ1. [file Beilstein_J_Nanotechnol-07-492-s001.zip › Supporting information and raw data/FastscanC-2-chip10_perpg2_h100_ch100_offset0_pvsPD.lvm]

	0.043564	-0.032424
	0.043564	-0.032416
	0.043564	-0.032353
	0.043564	-0.032374
	0.043564	-0.032359
	0.043564	-0.032322
	0.043564	-0.032324
	0.043564	-0.032514
	0.043564	-0.032362
	0.043564	-0.032489
	0.043564	-0.032587
	0.043564	-0.032294
	0.043564	-0.032343
	0.043564	-0.032441
	0.043564	-0.032416
	0.043564	-0.032478
	0.043564	-0.032443
	0.043564	-0.032561
	0.043564	-0.032557
	0.048863	-0.033015
	0.048863	-0.033004
	0.048863	-0.033143
	0.048863	-0.033079
	0.048863	-0.033153
	0.048863	-0.033242
	0.048863	-0.033138
	0.048863	-0.033153
	0.048863	-0.033154
	0.048863	-0.033211
	0.048863	-0.033333
	0.048863	-0.033261
	0.048863	-0.033104
	0.048863	-0.033293
	0.048863	-0.033282
	0.048863	-0.033174
	0.048863	-0.033234
	0.048863	-0.033280
	0.048863	-0.033264
	0.048863	-0.033124
	0.048863	-0.033305
	0.048863	-0.033283
	0.048863	-0.033457
	0.048863	-0.033526
	0.048863	-0.033559
	0.048863	-0.033685
	0.048863	-0.033647
	0.048863	-0.033635
	0.048863	-0.033731
	0.048863	-0.033641
	0.048863	-0.033671
	0.048863	-0.033816
	0.048863	-0.033759
	0.048863	-0.033751
	0.048863	-0.033646
	0.048863	-0.033790
	0.048863	-0.033738
	0.048863	-0.033705
	0.048863	-0.033728
	0.048863	-0.033738
	0.048863	-0.033792
	0.048863	-0.033909
	0.048863	-0.033737
	0.048863	-0.033793
	0.048863	-0.033789
	0.048863	-0.034001
	0.048863	-0.034012
	0.048863	-0.033940
	0.048863	-0.034036
	0.048863	-0.034108
	0.056595	-0.034884
	0.056595	-0.034890
	0.056595	-0.035072
	0.056595	-0.035012
	0.056595	-0.034909
	0.056595	-0.034899
	0.056595	-0.035108
	0.056595	-0.035254
	0.056595	-0.035182
	0.056595	-0.035319
	0.056595	-0.035472
	0.056595	-0.035496
	0.056595	-0.035456
	0.056595	-0.035486
	0.056595	-0.035666
	0.056595	-0.035706
	0.056595	-0.035838
	0.056595	-0.035730
	0.056595	-0.035691
	0.056595	-0.035570
	0.056595	-0.035583
	0.056595	-0.035834
	0.056595	-0.035825
	0.056595	-0.035678
	0.056595	-0.035905
	0.056595	-0.035767
	0.056595	-0.035949
	0.056595	-0.035992
	0.056595	-0.035901
	0.056595	-0.035954
	0.056595	-0.036113
	0.056595	-0.036012
	0.056595	-0.036183
	0.056595	-0.036156
	0.056595	-0.036144
	0.056595	-0.036192
	0.056595	-0.036404
	0.056595	-0.036468
	0.056595	-0.036371
	0.056595	-0.036489
	0.056595	-0.036431
	0.056595	-0.036511
	0.056595	-0.036409
	0.056595	-0.036351
	0.056595	-0.036436
	0.056595	-0.036680
	0.056595	-0.036572
	0.056595	-0.036594
	0.056595	-0.036735
	0.056595	-0.036897
	0.074709	-0.035590
	0.074709	-0.035550
	0.074709	-0.035570
	0.074709	-0.035495
	0.074709	-0.035555
	0.074709	-0.035574
	0.074709	-0.035697
	0.074709	-0.035697
	0.074709	-0.035478
	0.074709	-0.035490
	0.074709	-0.035613
	0.074709	-0.035521
	0.074709	-0.035667
	0.074709	-0.035534
	0.074709	-0.035620
	0.074709	-0.035693
	0.074709	-0.035729
	0.074709	-0.035572
	0.074709	-0.035802
	0.074709	-0.035895
	0.074709	-0.035988
	0.074709	-0.035928
	0.074709	-0.036030
	0.074709	-0.036086
	0.074709	-0.036056
	0.074709	-0.035907
	0.074709	-0.035898
	0.074709	-0.035794
	0.074709	-0.036010
	0.074709	-0.036044
	0.074709	-0.036138
	0.074709	-0.035959
	0.074709	-0.036035
	0.074709	-0.035936
	0.074709	-0.035898
	0.074709	-0.036135
	0.074709	-0.035956
	0.074709	-0.036036
	0.074709	-0.036011
	0.074709	-0.036123
	0.074709	-0.036120
	0.074709	-0.036113
	0.074709	-0.036264
	0.074709	-0.036064
	0.074709	-0.036307
	0.074709	-0.036400
	0.074709	-0.036402
	0.074709	-0.036301
	0.074709	-0.036182
	0.074709	-0.036200
	0.129476	-0.018255
	0.129476	-0.018062
	0.129476	-0.018247
	0.129476	-0.018136
	0.129476	-0.017979
	0.129476	-0.017953
	0.129476	-0.018024
	0.129476	-0.018224
	0.129476	-0.018259
	0.129476	-0.018389
	0.129476	-0.018177
	0.129476	-0.018246
	0.129476	-0.018077
	0.129476	-0.018132
	0.129476	-0.018042
	0.129476	-0.018060
	0.129476	-0.018272
	0.129476	-0.018069
	0.129476	-0.018159
	0.129476	-0.018185
	0.129476	-0.018145
	0.129476	-0.018190
	0.129476	-0.018274
	0.129476	-0.018201
	0.129476	-0.018250
	0.129476	-0.018142
	0.129476	-0.018109
	0.129476	-0.018180
	0.129476	-0.018299
	0.129476	-0.018294
	0.129476	-0.018205
	0.129476	-0.018345
	0.129476	-0.018341
	0.129476	-0.018309
	0.129476	-0.018364
	0.129476	-0.018274
	0.129476	-0.018455
	0.129476	-0.018346
	0.129476	-0.018257
	0.129476	-0.018526
	0.129476	-0.018372
	0.129476	-0.018435
	0.129476	-0.018469
	0.129476	-0.018449
	0.129476	-0.018508
	0.129476	-0.018322
	0.129476	-0.018405
	0.129476	-0.018404
	0.129476	-0.018514
	0.129476	-0.018549
	0.205380	0.021491
	0.205380	0.021436
	0.205380	0.021346
	0.205380	0.021387
	0.205380	0.021545
	0.205380	0.021463
	0.205380	0.021377
	0.205380	0.021303
	0.205380	0.021365
	0.205380	0.021281
	0.205380	0.021455
	0.205380	0.021602
	0.205380	0.021607
	0.205380	0.021629
	0.205380	0.021846
	0.205380	0.021766
	0.205380	0.021665
	0.205380	0.021625
	0.205380	0.021579
	0.205380	0.021815
	0.205380	0.021699
	0.205380	0.021621
	0.205380	0.021652
	0.205380	0.021653
	0.205380	0.021813
	0.205380	0.021852
	0.205380	0.021878
	0.205380	0.021757
	0.205380	0.021738
	0.205380	0.021902
	0.205380	0.021763
	0.205380	0.021925
	0.205380	0.021778
	0.205380	0.021751
	0.205380	0.021694
	0.205380	0.021655
	0.205380	0.021938
	0.205380	0.021891
	0.205380	0.021899
	0.205380	0.021816
	0.205380	0.021777
	0.205380	0.021781
	0.205380	0.021796
	0.205380	0.021889
	0.205380	0.021775
	0.205380	0.021709
	0.205380	0.021634
	0.205380	0.021948
	0.205380	0.021844
	0.205380	0.021853
	0.310480	0.090892
	0.310480	0.091012
	0.310480	0.090973
	0.310480	0.090976
	0.310480	0.091123
	0.310480	0.091271
	0.310480	0.091181
	0.310480	0.091241
	0.310480	0.091288
	0.310480	0.091481
	0.310480	0.091292
	0.310480	0.091393
	0.310480	0.091353
	0.310480	0.091331
	0.310480	0.091477
	0.310480	0.091506
	0.310480	0.091502
	0.310480	0.091554
	0.310480	0.091464
	0.310480	0.091481
	0.310480	0.091640
	0.310480	0.091649
	0.310480	0.091570
	0.310480	0.091390
	0.310480	0.091546
	0.310480	0.091758
	0.310480	0.091832
	0.310480	0.091952
	0.310480	0.091919
	0.310480	0.091988
	0.310480	0.091721
	0.310480	0.091782
	0.310480	0.091929
	0.310480	0.091769
	0.310480	0.091822
	0.310480	0.091885
	0.310480	0.091976
	0.310480	0.092076
	0.310480	0.092198
	0.310480	0.092093
	0.310480	0.092145
	0.310480	0.092161
	0.310480	0.092092
	0.310480	0.092182
	0.310480	0.092310
	0.310480	0.092421
	0.310480	0.092250
	0.310480	0.092129
	0.310480	0.092303
	0.310480	0.092079
	0.438754	0.187428
	0.438754	0.187462
	0.438754	0.187574
	0.438754	0.187510
	0.438754	0.187566
	0.438754	0.187498
	0.438754	0.187668
	0.438754	0.187830
	0.438754	0.187907
	0.438754	0.187843
	0.438754	0.187895
	0.438754	0.187828
	0.438754	0.187835
	0.438754	0.187901
	0.438754	0.187696
	0.438754	0.187847
	0.438754	0.187735
	0.438754	0.187874
	0.438754	0.188011
	0.438754	0.188004
	0.438754	0.187992
	0.438754	0.187913
	0.438754	0.188021
	0.438754	0.187865
	0.438754	0.187918
	0.438754	0.187973
	0.438754	0.188133
	0.438754	0.188047
	0.438754	0.188048
	0.438754	0.188153
	0.438754	0.188211
	0.438754	0.188296
	0.438754	0.188137
	0.438754	0.188172
	0.438754	0.188137
	0.438754	0.188158
	0.438754	0.188196
	0.438754	0.188265
	0.438754	0.188445
	0.438754	0.188284
	0.438754	0.188300
	0.438754	0.188143
	0.438754	0.188075
	0.438754	0.188251
	0.438754	0.188330
	0.438754	0.188222
	0.438754	0.188257
	0.438754	0.188497
	0.438754	0.188401
	0.438754	0.188439
	0.584142	0.308747
	0.584142	0.308744
	0.584142	0.308849
	0.584142	0.308800
	0.584142	0.308925
	0.584142	0.308999
	0.584142	0.309134
	0.584142	0.308903
	0.584142	0.309065
	0.584142	0.309171
	0.584142	0.309238
	0.584142	0.309105
	0.584142	0.309270
	0.584142	0.309356
	0.584142	0.309604
	0.584142	0.309450
	0.584142	0.309335
	0.584142	0.309480
	0.584142	0.309595
	0.584142	0.309725
	0.584142	0.309985
	0.584142	0.309953
	0.584142	0.309804
	0.584142	0.309869
	0.584142	0.309907
	0.584142	0.310131
	0.584142	0.310146
	0.584142	0.310122
	0.584142	0.310132
	0.584142	0.310055
	0.584142	0.310165
	0.584142	0.310423
	0.584142	0.310484
	0.584142	0.310463
	0.584142	0.310569
	0.584142	0.310625
	0.584142	0.310640
	0.584142	0.310567
	0.584142	0.310613
	0.584142	0.310509
	0.584142	0.310527
	0.584142	0.310578
	0.584142	0.310653
	0.584142	0.310918
	0.584142	0.310938
	0.584142	0.310838
	0.584142	0.311043
	0.584142	0.310948
	0.584142	0.310857
	0.584142	0.310895
	0.745792	0.459199
	0.745792	0.459555
	0.745792	0.459657
	0.745792	0.459626
	0.745792	0.459591
	0.745792	0.459838
	0.745792	0.460031
	0.745792	0.459942
	0.745792	0.460001
	0.745792	0.459880
	0.745792	0.460023
	0.745792	0.460028
	0.745792	0.460127
	0.745792	0.460243
	0.745792	0.460448
	0.745792	0.460583
	0.745792	0.460524
	0.745792	0.460504
	0.745792	0.460811
	0.745792	0.460851
	0.745792	0.460950
	0.745792	0.460963
	0.745792	0.461026
	0.745792	0.461245
	0.745792	0.461329
	0.745792	0.461335
	0.745792	0.461316
	0.745792	0.461222
	0.745792	0.461277
	0.745792	0.461327
	0.745792	0.461305
	0.745792	0.461365
	0.745792	0.461650
	0.745792	0.461650
	0.745792	0.461648
	0.745792	0.461585
	0.745792	0.461874
	0.745792	0.461780
	0.745792	0.461880
	0.745792	0.462013
	0.745792	0.462099
	0.745792	0.461973
	0.745792	0.461862
	0.745792	0.462137
	0.745792	0.462174
	0.745792	0.462284
	0.745792	0.462349
	0.745792	0.462334
	0.745792	0.462328
	0.745792	0.462454
	0.923857	0.645127
	0.923857	0.645026
	0.923857	0.644916
	0.923857	0.645119
	0.923857	0.645178
	0.923857	0.645445
	0.923857	0.645626
	0.923857	0.645644
	0.923857	0.645875
	0.923857	0.645879
	0.923857	0.645956
	0.923857	0.646180
	0.923857	0.646226
	0.923857	0.646271
	0.923857	0.646449
	0.923857	0.646393
	0.923857	0.646768
	0.923857	0.646636
	0.923857	0.646842
	0.923857	0.646792
	0.923857	0.646856
	0.923857	0.646806
	0.923857	0.646888
	0.923857	0.646886
	0.923857	0.647123
	0.923857	0.647138
	0.923857	0.647112
	0.923857	0.647143
	0.923857	0.647207
	0.923857	0.647371
	0.923857	0.647459
	0.923857	0.647497
	0.923857	0.647674
	0.923857	0.647535
	0.923857	0.647648
	0.923857	0.647749
	0.923857	0.647824
	0.923857	0.647924
	0.923857	0.647937
	0.923857	0.648064
	0.923857	0.648084
	0.923857	0.648116
	0.923857	0.648326
	0.923857	0.648074
	0.923857	0.648418
	0.923857	0.648352
	0.923857	0.648373
	0.923857	0.648464
	0.923857	0.648465
	0.923857	0.648508
	1.116210	0.868130
	1.116210	0.868450
	1.116210	0.868543
	1.116210	0.868682
	1.116210	0.868594
	1.116210	0.868705
	1.116210	0.868864
	1.116210	0.869057
	1.116210	0.868841
	1.116210	0.869069
	1.116210	0.869107
	1.116210	0.869450
	1.116210	0.869263
	1.116210	0.869469
	1.116210	0.869493
	1.116210	0.869555
	1.116210	0.869404
	1.116210	0.869725
	1.116210	0.869771
	1.116210	0.869850
	1.116210	0.869833
	1.116210	0.870046
	1.116210	0.870117
	1.116210	0.870229
	1.116210	0.870222
	1.116210	0.870374
	1.116210	0.870528
	1.116210	0.870496
	1.116210	0.870524
	1.116210	0.870694
	1.116210	0.870755
	1.116210	0.870777
	1.116210	0.870919
	1.116210	0.870954
	1.116210	0.871067
	1.116210	0.870829
	1.116210	0.871128
	1.116210	0.871263
	1.116210	0.871264
	1.116210	0.871074
	1.116210	0.871406
	1.116210	0.871420
	1.116210	0.871684
	1.116210	0.871480
	1.116210	0.871596
	1.116210	0.871629
	1.116210	0.871670
	1.116210	0.871698
	1.116210	0.871979
	1.116210	0.871983
	1.311851	1.118665
	1.311851	1.119203
	1.311851	1.118808
	1.311851	1.119421
	1.311851	1.119545
	1.311851	1.119920
	1.311851	1.119542
	1.311851	1.120218
	1.311851	1.119890
	1.311851	1.120528
	1.311851	1.120203
	1.311851	1.120506
	1.311851	1.120541
	1.311851	1.120423
	1.311851	1.120816
	1.311851	1.120477
	1.311851	1.121112
	1.311851	1.120798
	1.311851	1.121094
	1.311851	1.121134
	1.311851	1.120981
	1.311851	1.121416
	1.311851	1.121206
	1.311851	1.121695
	1.311851	1.121245
	1.311851	1.122046
	1.311851	1.122103
	1.311851	1.122161
	1.311851	1.122312
	1.311851	1.122073
	1.311851	1.122446
	1.311851	1.122323
	1.311851	1.122732
	1.311851	1.122477
	1.311851	1.122864
	1.311851	1.122726
	1.311851	1.122938
	1.311851	1.123098
	1.311851	1.122899
	1.311851	1.123411
	1.311851	1.123102
	1.311851	1.123599
	1.311851	1.123557
	1.311851	1.123871
	1.311851	1.123721
	1.311851	1.123862
	1.311851	1.124091
	1.311851	1.123907
	1.311851	1.124576
	1.311851	1.124033
	1.512172	1.393922
	1.512172	1.394606
	1.512172	1.394079
	1.512172	1.394860
	1.512172	1.394645
	1.512172	1.394714
	1.512172	1.395450
	1.512172	1.394764
	1.512172	1.395481
	1.512172	1.395379
	1.512172	1.395267
	1.512172	1.395864
	1.512172	1.395269
	1.512172	1.395817
	1.512172	1.395909
	1.512172	1.395657
	1.512172	1.396572
	1.512172	1.395904
	1.512172	1.396235
	1.512172	1.396540
	1.512172	1.396175
	1.512172	1.396983
	1.512172	1.396183
	1.512172	1.396698
	1.512172	1.396919
	1.512172	1.396467
	1.512172	1.397396
	1.512172	1.396650
	1.512172	1.397190
	1.512172	1.396992
	1.512172	1.396529
	1.512172	1.397793
	1.512172	1.396850
	1.512172	1.397718
	1.512172	1.397490
	1.512172	1.397468
	1.512172	1.398512
	1.512172	1.397789
	1.512172	1.398164
	1.512172	1.398248
	1.512172	1.397871
	1.512172	1.398722
	1.512172	1.398082
	1.512172	1.398565
	1.512172	1.398619
	1.512172	1.398026
	1.512172	1.398997
	1.512172	1.398462
	1.512172	1.398716
	1.512172	1.398819
	1.711064	1.690915
	1.711064	1.692058
	1.711064	1.691530
	1.711064	1.692340
	1.711064	1.692740
	1.711064	1.692143
	1.711064	1.692656
	1.711064	1.692957
	1.711064	1.693077
	1.711064	1.693118
	1.711064	1.693419
	1.711064	1.693606
	1.711064	1.693566
	1.711064	1.693825
	1.711064	1.694180
	1.711064	1.694079
	1.711064	1.694059
	1.711064	1.694561
	1.711064	1.694397
	1.711064	1.694261
	1.711064	1.694545
	1.711064	1.695020
	1.711064	1.694792
	1.711064	1.695077
	1.711064	1.695443
	1.711064	1.695182
	1.711064	1.695084
	1.711064	1.695595
	1.711064	1.695991
	1.711064	1.695607
	1.711064	1.695964
	1.711064	1.696463
	1.711064	1.696505
	1.711064	1.696255
	1.711064	1.696743
	1.711064	1.696939
	1.711064	1.696610
	1.711064	1.696830
	1.711064	1.697373
	1.711064	1.697194
	1.711064	1.697178
	1.711064	1.697276
	1.711064	1.697741
	1.711064	1.697208
	1.711064	1.697795
	1.711064	1.697764
	1.711064	1.698116
	1.711064	1.698710
	1.711064	1.698685
	1.711064	1.698887
	1.915655	2.019290
	1.915655	2.019682
	1.915655	2.020394
	1.915655	2.021463
	1.915655	2.022575
	1.915655	2.022914
	1.915655	2.023367
	1.915655	2.025061
	1.915655	2.025231
	1.915655	2.024507
	1.915655	2.025673
	1.915655	2.026015
	1.915655	2.026910
	1.915655	2.026882
	1.915655	2.028219
	1.915655	2.029732
	1.915655	2.031270
	1.915655	2.030639
	1.915655	2.031304
	1.915655	2.031346
	1.915655	2.033791
	1.915655	2.032874
	1.915655	2.033667
	1.915655	2.033692
	1.915655	2.034788
	1.915655	2.035480
	1.915655	2.035793
	1.915655	2.035073
	1.915655	2.036913
	1.915655	2.037600
	1.915655	2.037886
	1.915655	2.038244
	1.915655	2.037879
	1.915655	2.038635
	1.915655	2.038321
	1.915655	2.040199
	1.915655	2.039247
	1.915655	2.039691
	1.915655	2.040163
	1.915655	2.040921
	1.915655	2.040067
	1.915655	2.041556
	1.915655	2.044254
	1.915655	2.041482
	1.915655	2.042109
	1.915655	2.041423
	1.915655	2.043043
	1.915655	2.042842
	1.915655	2.043856
	1.915655	2.046536
	1.915655	2.043185
	1.915655	2.044405
	1.915655	2.044556
	1.915655	2.045044
	1.915655	2.044626
	1.915655	2.044453
	1.915655	2.046311
	1.915655	2.046739
	1.915655	2.045294
	1.915655	2.045692
	1.915655	2.044454
	1.915655	2.045347
	1.915655	2.046099
	1.915655	2.046360
	1.915655	2.046000
	1.915655	2.045790
	1.915655	2.046954
	1.915655	2.045147
	1.915655	2.045916
	1.915655	2.047211
	1.915655	2.046393
	1.915655	2.045321
	1.915655	2.044387
	1.915655	2.044848
	1.915655	2.044838
	1.915655	2.045781
	1.915655	2.045391
	1.915655	2.044236
	1.915655	2.042905
	1.915655	2.045260
	1.915655	2.045197
	1.915655	2.045512
	1.915655	2.044176
	1.915655	2.045594
	1.915655	2.046127
	1.915655	2.043383
	1.915655	2.044838
	1.915655	2.044200
	1.915655	2.043906
	1.915655	2.044730
	1.915655	2.045040
	1.915655	2.044747
	1.915655	2.043362
	1.915655	2.043788
	1.915655	2.044246
	1.915655	2.042571
	1.915655	2.043163
	1.915655	2.043470
	1.915655	2.044224
	1.915655	2.045921
	1.915655	2.044491
	1.915655	2.044965
	1.915655	2.043794
	1.915655	2.044054
	1.915655	2.044602
	1.915655	2.044330
	1.915655	2.044738
	1.915655	2.042719
	1.915655	2.043192
	1.915655	2.042334
	1.915655	2.043542
	1.915655	2.041694
	1.915655	2.042336
	1.915655	2.042338
	1.915655	2.044389
	1.915655	2.041224
	1.915655	2.043240
	1.915655	2.043625
	1.915655	2.042655
	1.915655	2.042175
	1.915655	2.042998
	1.915655	2.044755
	1.915655	2.043349
	1.915655	2.044044
	1.915655	2.043814
	1.915655	2.042987
	1.915655	2.042672
	1.915655	2.044430
	1.915655	2.043732
	1.915655	2.043443
	1.915655	2.043371
	1.915655	2.044459
	1.915655	2.043470
	1.915655	2.043224
	1.915655	2.042962
	1.915655	2.043780
	1.915655	2.042981
	2.128494	2.400530
	2.128494	2.400831
	2.128494	2.399959
	2.128494	2.401890
	2.128494	2.399940
	2.128494	2.399163
	2.128494	2.400631
	2.128494	2.400079
	2.128494	2.400161
	2.128494	2.400679
	2.128494	2.401789
	2.128494	2.401900
	2.128494	2.402391
	2.128494	2.402594
	2.128494	2.401297
	2.128494	2.401535
	2.128494	2.401193
	2.128494	2.401360
	2.128494	2.404245
	2.128494	2.400651
	2.128494	2.400139
	2.128494	2.402718
	2.128494	2.402316
	2.128494	2.402109
	2.128494	2.402892
	2.128494	2.402481
	2.128494	2.403710
	2.128494	2.401605
	2.128494	2.403283
	2.128494	2.404203
	2.128494	2.402415
	2.128494	2.402906
	2.128494	2.403689
	2.128494	2.402702
	2.128494	2.402955
	2.128494	2.401890
	2.128494	2.404160
	2.128494	2.402809
	2.128494	2.403033
	2.128494	2.402920
	2.128494	2.403133
	2.128494	2.403367
	2.128494	2.403979
	2.128494	2.403229
	2.128494	2.402631
	2.128494	2.403809
	2.128494	2.403711
	2.128494	2.403441
	2.128494	2.402926
	2.128494	2.403470
	1.963880	2.134591
	1.963880	2.133876
	1.963880	2.130814
	1.963880	2.134455
	1.963880	2.133478
	1.963880	2.135129
	1.963880	2.134378
	1.963880	2.134608
	1.963880	2.133108
	1.963880	2.134851
	1.963880	2.136653
	1.963880	2.136090
	1.963880	2.134194
	1.963880	2.134816
	1.963880	2.135073
	1.963880	2.134244
	1.963880	2.135596
	1.963880	2.134202
	1.963880	2.136245
	1.963880	2.136018
	1.963880	2.137285
	1.963880	2.135619
	1.963880	2.134636
	1.963880	2.137613
	1.963880	2.137208
	1.963880	2.137247
	1.963880	2.135161
	1.963880	2.135665
	1.963880	2.136349
	1.963880	2.138625
	1.963880	2.139036
	1.963880	2.136169
	1.963880	2.137671
	1.963880	2.137720
	1.963880	2.136379
	1.963880	2.136459
	1.963880	2.134882
	1.963880	2.136148
	1.963880	2.136896
	1.963880	2.136470
	1.963880	2.136348
	1.963880	2.138321
	1.963880	2.138235
	1.963880	2.137575
	1.963880	2.138308
	1.963880	2.135216
	1.963880	2.137415
	1.963880	2.137747
	1.963880	2.138730
	1.963880	2.135520
	1.739083	1.774388
	1.739083	1.772545
	1.739083	1.771064
	1.739083	1.773665
	1.739083	1.773799
	1.739083	1.772373
	1.739083	1.770213
	1.739083	1.774023
	1.739083	1.773025
	1.739083	1.769565
	1.739083	1.773453
	1.739083	1.773519
	1.739083	1.771900
	1.739083	1.772026
	1.739083	1.773363
	1.739083	1.772463
	1.739083	1.771582
	1.739083	1.772495
	1.739083	1.772431
	1.739083	1.771919
	1.739083	1.771443
	1.739083	1.772449
	1.739083	1.772086
	1.739083	1.771491
	1.739083	1.771883
	1.739083	1.771676
	1.739083	1.771470
	1.739083	1.771820
	1.739083	1.771509
	1.739083	1.771027
	1.739083	1.771373
	1.739083	1.771175
	1.739083	1.770878
	1.739083	1.770663
	1.739083	1.771117
	1.739083	1.770548
	1.739083	1.770458
	1.739083	1.770849
	1.739083	1.770388
	1.739083	1.770202
	1.739083	1.769976
	1.739083	1.770309
	1.739083	1.769780
	1.739083	1.769749
	1.739083	1.770250
	1.739083	1.769568
	1.739083	1.769299
	1.739083	1.769734
	1.739083	1.769714
	1.739083	1.769168
	1.491661	1.401522
	1.491661	1.401317
	1.491661	1.400825
	1.491661	1.401284
	1.491661	1.400329
	1.491661	1.401221
	1.491661	1.400468
	1.491661	1.400647
	1.491661	1.400541
	1.491661	1.399864
	1.491661	1.400454
	1.491661	1.399770
	1.491661	1.399678
	1.491661	1.400116
	1.491661	1.399148
	1.491661	1.399956
	1.491661	1.398870
	1.491661	1.399285
	1.491661	1.398643
	1.491661	1.398683
	1.491661	1.398810
	1.491661	1.398220
	1.491661	1.398934
	1.491661	1.397880
	1.491661	1.399011
	1.491661	1.397662
	1.491661	1.398525
	1.491661	1.397981
	1.491661	1.397470
	1.491661	1.398305
	1.491661	1.397119
	1.491661	1.397834
	1.491661	1.396921
	1.491661	1.397285
	1.491661	1.396959
	1.491661	1.396818
	1.491661	1.397338
	1.491661	1.396268
	1.491661	1.397135
	1.491661	1.396341
	1.491661	1.396702
	1.491661	1.396589
	1.491661	1.396039
	1.491661	1.396710
	1.491661	1.395904
	1.491661	1.396585
	1.491661	1.395685
	1.491661	1.395906
	1.491661	1.395690
	1.491661	1.395518
	1.235544	1.052675
	1.235544	1.052360
	1.235544	1.052006
	1.235544	1.052039
	1.235544	1.051822
	1.235544	1.051833
	1.235544	1.051604
	1.235544	1.051302
	1.235544	1.051584
	1.235544	1.051205
	1.235544	1.051003
	1.235544	1.051143
	1.235544	1.050790
	1.235544	1.050772
	1.235544	1.050705
	1.235544	1.050409
	1.235544	1.050645
	1.235544	1.050479
	1.235544	1.050270
	1.235544	1.050383
	1.235544	1.050222
	1.235544	1.050029
	1.235544	1.050312
	1.235544	1.050173
	1.235544	1.049739
	1.235544	1.049824
	1.235544	1.049667
	1.235544	1.049511
	1.235544	1.049699
	1.235544	1.049368
	1.235544	1.049632
	1.235544	1.049366
	1.235544	1.049163
	1.235544	1.049460
	1.235544	1.049162
	1.235544	1.048776
	1.235544	1.048862
	1.235544	1.048523
	1.235544	1.048255
	1.235544	1.048461
	1.235544	1.048211
	1.235544	1.048200
	1.235544	1.048177
	1.235544	1.047925
	1.235544	1.048032
	1.235544	1.048063
	1.235544	1.047760
	1.235544	1.047981
	1.235544	1.047699
	1.235544	1.047376
	0.981419	0.742783
	0.981419	0.742776
	0.981419	0.742505
	0.981419	0.742503
	0.981419	0.742362
	0.981419	0.742400
	0.981419	0.742149
	0.981419	0.742282
	0.981419	0.742060
	0.981419	0.742091
	0.981419	0.742196
	0.981419	0.742079
	0.981419	0.741925
	0.981419	0.741913
	0.981419	0.741692
	0.981419	0.741518
	0.981419	0.741405
	0.981419	0.741262
	0.981419	0.741088
	0.981419	0.741195
	0.981419	0.740828
	0.981419	0.740779
	0.981419	0.741051
	0.981419	0.740959
	0.981419	0.740606
	0.981419	0.740622
	0.981419	0.740329
	0.981419	0.740240
	0.981419	0.740230
	0.981419	0.740246
	0.981419	0.739914
	0.981419	0.740075
	0.981419	0.740017
	0.981419	0.740018
	0.981419	0.739823
	0.981419	0.739895
	0.981419	0.739816
	0.981419	0.739677
	0.981419	0.739642
	0.981419	0.739501
	0.981419	0.739527
	0.981419	0.739395
	0.981419	0.739290
	0.981419	0.739221
	0.981419	0.739205
	0.981419	0.739029
	0.981419	0.738910
	0.981419	0.738971
	0.981419	0.739013
	0.981419	0.738652
	0.743064	0.490394
	0.743064	0.490396
	0.743064	0.490289
	0.743064	0.490232
	0.743064	0.490067
	0.743064	0.489837
	0.743064	0.489905
	0.743064	0.489808
	0.743064	0.489518
	0.743064	0.489461
	0.743064	0.489444
	0.743064	0.489279
	0.743064	0.489128
	0.743064	0.489081
	0.743064	0.488780
	0.743064	0.488715
	0.743064	0.488645
	0.743064	0.488544
	0.743064	0.488465
	0.743064	0.488225
	0.743064	0.488077
	0.743064	0.487963
	0.743064	0.487943
	0.743064	0.487904
	0.743064	0.487674
	0.743064	0.487584
	0.743064	0.487448
	0.743064	0.487502
	0.743064	0.487435
	0.743064	0.487440
	0.743064	0.487418
	0.743064	0.487295
	0.743064	0.487227
	0.743064	0.487144
	0.743064	0.487223
	0.743064	0.486912
	0.743064	0.486833
	0.743064	0.486917
	0.743064	0.486798
	0.743064	0.486636
	0.743064	0.486884
	0.743064	0.486801
	0.743064	0.486752
	0.743064	0.486707
	0.743064	0.486592
	0.743064	0.486246
	0.743064	0.486218
	0.743064	0.486234
	0.743064	0.486191
	0.743064	0.486116
	0.532343	0.296199
	0.532343	0.295865
	0.532343	0.296059
	0.532343	0.296178
	0.532343	0.295908
	0.532343	0.295805
	0.532343	0.295740
	0.532343	0.295940
	0.532343	0.295611
	0.532343	0.295559
	0.532343	0.295675
	0.532343	0.295579
	0.532343	0.295394
	0.532343	0.295211
	0.532343	0.295089
	0.532343	0.294928
	0.532343	0.294629
	0.532343	0.294539
	0.532343	0.294493
	0.532343	0.294608
	0.532343	0.294522
	0.532343	0.294536
	0.532343	0.294394
	0.532343	0.294281
	0.532343	0.293988
	0.532343	0.293837
	0.532343	0.293805
	0.532343	0.293898
	0.532343	0.293752
	0.532343	0.293675
	0.532343	0.293657
	0.532343	0.293730
	0.532343	0.293523
	0.532343	0.293415
	0.532343	0.293246
	0.532343	0.293190
	0.532343	0.293078
	0.532343	0.292962
	0.532343	0.292932
	0.532343	0.292829
	0.532343	0.292763
	0.532343	0.292684
	0.532343	0.292689
	0.532343	0.292700
	0.532343	0.292592
	0.532343	0.292433
	0.532343	0.292382
	0.532343	0.292269
	0.532343	0.292202
	0.532343	0.292173
	0.340879	0.141328
	0.340879	0.141320
	0.340879	0.141251
	0.340879	0.141088
	0.340879	0.140919
	0.340879	0.140949
	0.340879	0.140757
	0.340879	0.140735
	0.340879	0.140632
	0.340879	0.140634
	0.340879	0.140696
	0.340879	0.140671
	0.340879	0.140648
	0.340879	0.140372
	0.340879	0.140263
	0.340879	0.140289
	0.340879	0.140014
	0.340879	0.139971
	0.340879	0.139893
	0.340879	0.139842
	0.340879	0.139682
	0.340879	0.139509
	0.340879	0.139437
	0.340879	0.139524
	0.340879	0.139435
	0.340879	0.139369
	0.340879	0.139344
	0.340879	0.139173
	0.340879	0.139059
	0.340879	0.138933
	0.340879	0.138818
	0.340879	0.138713
	0.340879	0.138776
	0.340879	0.138675
	0.340879	0.138653
	0.340879	0.138695
	0.340879	0.138634
	0.340879	0.138726
	0.340879	0.138557
	0.340879	0.138665
	0.340879	0.138406
	0.340879	0.138377
	0.340879	0.138059
	0.340879	0.138211
	0.340879	0.137994
	0.340879	0.138117
	0.340879	0.138148
	0.340879	0.138083
	0.340879	0.137828
	0.340879	0.137784
	0.193087	0.039099
	0.193087	0.039015
	0.193087	0.039011
	0.193087	0.038826
	0.193087	0.038920
	0.193087	0.038915
	0.193087	0.038790
	0.193087	0.038703
	0.193087	0.038727
	0.193087	0.038804
	0.193087	0.038458
	0.193087	0.038536
	0.193087	0.038419
	0.193087	0.038105
	0.193087	0.038138
	0.193087	0.038209
	0.193087	0.038010
	0.193087	0.037961
	0.193087	0.037861
	0.193087	0.037931
	0.193087	0.037740
	0.193087	0.037555
	0.193087	0.037671
	0.193087	0.037746
	0.193087	0.037639
	0.193087	0.037496
	0.193087	0.037549
	0.193087	0.037224
	0.193087	0.037190
	0.193087	0.036952
	0.193087	0.036875
	0.193087	0.036829
	0.193087	0.036726
	0.193087	0.036532
	0.193087	0.036542
	0.193087	0.036519
	0.193087	0.036483
	0.193087	0.036581
	0.193087	0.036612
	0.193087	0.036447
	0.193087	0.036323
	0.193087	0.036362
	0.193087	0.036131
	0.193087	0.036275
	0.193087	0.036181
	0.193087	0.036160
	0.193087	0.036050
	0.193087	0.035972
	0.193087	0.035696
	0.193087	0.035746
	0.101117	-0.009564
	0.101117	-0.009607
	0.101117	-0.009860
	0.101117	-0.009925
	0.101117	-0.010083
	0.101117	-0.010138
	0.101117	-0.010219
	0.101117	-0.009937
	0.101117	-0.010032
	0.101117	-0.010042
	0.101117	-0.009957
	0.101117	-0.010152
	0.101117	-0.010248
	0.101117	-0.010290
	0.101117	-0.010580
	0.101117	-0.010404
	0.101117	-0.010488
	0.101117	-0.010441
	0.101117	-0.010595
	0.101117	-0.010747
	0.101117	-0.010837
	0.101117	-0.010797
	0.101117	-0.010705
	0.101117	-0.010807
	0.101117	-0.010927
	0.101117	-0.011061
	0.101117	-0.010773
	0.101117	-0.010908
	0.101117	-0.011012
	0.101117	-0.011047
	0.101117	-0.011133
	0.101117	-0.011070
	0.101117	-0.011141
	0.101117	-0.011372
	0.101117	-0.011299
	0.101117	-0.011179
	0.101117	-0.011430
	0.101117	-0.011375
	0.101117	-0.011568
	0.101117	-0.011772
	0.101117	-0.011727
	0.101117	-0.011804
	0.101117	-0.011763
	0.101117	-0.011678
	0.101117	-0.011847
	0.101117	-0.012062
	0.101117	-0.012112
	0.101117	-0.012141
	0.101117	-0.012230
	0.101117	-0.012316
	0.060446	-0.021074
	0.060446	-0.021010
	0.060446	-0.021081
	0.060446	-0.021254
	0.060446	-0.021205
	0.060446	-0.021182
	0.060446	-0.021255
	0.060446	-0.021281
	0.060446	-0.021299
	0.060446	-0.021515
	0.060446	-0.021578
	0.060446	-0.021603
	0.060446	-0.021399
	0.060446	-0.021497
	0.060446	-0.021487
	0.060446	-0.021747
	0.060446	-0.021796
	0.060446	-0.021723
	0.060446	-0.021830
	0.060446	-0.021831
	0.060446	-0.021740
	0.060446	-0.021845
	0.060446	-0.022023
	0.060446	-0.021972
	0.060446	-0.022177
	0.060446	-0.022136
	0.060446	-0.022201
	0.060446	-0.022102
	0.060446	-0.022107
	0.060446	-0.022185
	0.060446	-0.022223
	0.060446	-0.022532
	0.060446	-0.022647
	0.060446	-0.022458
	0.060446	-0.022601
	0.060446	-0.022722
	0.060446	-0.022816
	0.060446	-0.022793
	0.060446	-0.022645
	0.060446	-0.022865
	0.060446	-0.022898
	0.060446	-0.023067
	0.060446	-0.023191
	0.060446	-0.023200
	0.060446	-0.023384
	0.060446	-0.023274
	0.060446	-0.023041
	0.060446	-0.023157
	0.060446	-0.023364
	0.060446	-0.023484
	0.047217	-0.022053
	0.047217	-0.022001
	0.047217	-0.021930
	0.047217	-0.021876
	0.047217	-0.021918
	0.047217	-0.021940
	0.047217	-0.022043
	0.047217	-0.022035
	0.047217	-0.022196
	0.047217	-0.022262
	0.047217	-0.022189
	0.047217	-0.022219
	0.047217	-0.022317
	0.047217	-0.022291
	0.047217	-0.022386
	0.047217	-0.022229
	0.047217	-0.022426
	0.047217	-0.022398
	0.047217	-0.022537
	0.047217	-0.022619
	0.047217	-0.022691
	0.047217	-0.022728
	0.047217	-0.022689
	0.047217	-0.022921
	0.047217	-0.022824
	0.047217	-0.022819
	0.047217	-0.022887
	0.047217	-0.022942
	0.047217	-0.023125
	0.047217	-0.023009
	0.047217	-0.023001
	0.047217	-0.022928
	0.047217	-0.022944
	0.047217	-0.023055
	0.047217	-0.023044
	0.047217	-0.022890
	0.047217	-0.023076
	0.047217	-0.023240
	0.047217	-0.023279
	0.047217	-0.023269
	0.047217	-0.023183
	0.047217	-0.023324
	0.047217	-0.023354
	0.047217	-0.023361
	0.047217	-0.023447
	0.047217	-0.023533
	0.047217	-0.023430
	0.047217	-0.023612
	0.047217	-0.023595
	0.047217	-0.023568
	0.043102	-0.024099
	0.043102	-0.023903
	0.043102	-0.024092
	0.043102	-0.024295
	0.043102	-0.024392
	0.043102	-0.024344
	0.043102	-0.024599
	0.043102	-0.024346
	0.043102	-0.024476
	0.043102	-0.024467
	0.043102	-0.024567
	0.043102	-0.024417
	0.043102	-0.024516
	0.043102	-0.024608
	0.043102	-0.024919
	0.043102	-0.024803
	0.043102	-0.024858
	0.043102	-0.024919
	0.043102	-0.024899
	0.043102	-0.024958
	0.043102	-0.025003
	0.043102	-0.025106
	0.043102	-0.025114
	0.043102	-0.025235
	0.043102	-0.025287
	0.043102	-0.025454
	0.043102	-0.025420
	0.043102	-0.025359
	0.043102	-0.025364
	0.043102	-0.025452
	0.043102	-0.025523
	0.043102	-0.025545
	0.043102	-0.025570
	0.043102	-0.025694
	0.043102	-0.025699
	0.043102	-0.025754
	0.043102	-0.025714
	0.043102	-0.025763
	0.043102	-0.025817
	0.043102	-0.025962
	0.043102	-0.026074
	0.043102	-0.025995
	0.043102	-0.026133
	0.043102	-0.026242
	0.043102	-0.026284
	0.043102	-0.026197
	0.043102	-0.026176
	0.043102	-0.026110
	0.043102	-0.026058
	0.043102	-0.026229
	0.043296	-0.027747
	0.043296	-0.027723
	0.043296	-0.027938
	0.043296	-0.027785
	0.043296	-0.027817
	0.043296	-0.027807
	0.043296	-0.027806
	0.043296	-0.027887
	0.043296	-0.027847
	0.043296	-0.027897
	0.043296	-0.027968
	0.043296	-0.027916
	0.043296	-0.027743
	0.043296	-0.027902
	0.043296	-0.027885
	0.043296	-0.028099
	0.043296	-0.028130
	0.043296	-0.028110
	0.043296	-0.028376
	0.043296	-0.028352
	0.043296	-0.028325
	0.043296	-0.028521
	0.043296	-0.028516
	0.043296	-0.028567
	0.043296	-0.028435
	0.043296	-0.028487
	0.043296	-0.028490
	0.043296	-0.028516
	0.043296	-0.028545
	0.043296	-0.028592
	0.043296	-0.028593
	0.043296	-0.028586
	0.043296	-0.028807
	0.043296	-0.028737
	0.043296	-0.028825
	0.043296	-0.029073
	0.043296	-0.029359
	0.043296	-0.029283
	0.043296	-0.029326
	0.043296	-0.029349
	0.043296	-0.029334
	0.043296	-0.029217
	0.043296	-0.029197
