# Supplementary material for: Contact-free experimental determination of the static flexural spring constant of cantilever sensors using a microfluidic force tool
Source: Beilstein J Nanotechnol. 2016 Mar 30;7:492–500. doi: 10.3762/bjnano.7.43 (PMC4901535; doi:10.3762/bjnano.7.43)
Supplement: File 1 — Raw data of thermal noise spectra, cantilever deflection under fluid flow, and sensitivity values σ1. [file Beilstein_J_Nanotechnol-07-492-s001.zip › Supporting information and raw data/NCHV-1-chip3_perpg2_h100_ch100_offset0_pvsPD.lvm]

	0.037252	-0.071813
	0.037252	-0.071844
	0.037252	-0.071847
	0.037252	-0.071833
	0.037252	-0.071832
	0.037252	-0.071843
	0.037252	-0.071853
	0.037252	-0.071835
	0.037252	-0.071831
	0.037252	-0.071849
	0.037252	-0.071852
	0.037252	-0.071859
	0.037252	-0.071854
	0.037252	-0.071865
	0.037252	-0.071858
	0.037252	-0.071841
	0.037252	-0.071850
	0.037252	-0.071847
	0.037252	-0.071835
	0.037252	-0.071846
	0.037252	-0.071865
	0.037252	-0.071850
	0.037252	-0.071858
	0.037252	-0.071841
	0.037252	-0.071820
	0.037252	-0.071825
	0.037252	-0.071848
	0.037252	-0.071862
	0.037252	-0.071884
	0.037252	-0.071848
	0.037252	-0.071855
	0.037252	-0.071848
	0.037252	-0.071839
	0.037252	-0.071849
	0.037252	-0.071839
	0.037252	-0.071848
	0.037252	-0.071840
	0.037252	-0.071851
	0.037252	-0.071854
	0.037252	-0.071848
	0.037252	-0.071861
	0.037252	-0.071867
	0.037252	-0.071875
	0.037252	-0.071869
	0.037252	-0.071878
	0.037252	-0.071880
	0.037252	-0.071873
	0.037252	-0.071890
	0.037252	-0.071867
	0.037252	-0.071874
	0.037252	-0.071870
	0.037252	-0.071880
	0.037252	-0.071869
	0.037252	-0.071874
	0.037252	-0.071852
	0.037252	-0.071884
	0.037252	-0.071873
	0.037252	-0.071870
	0.037252	-0.071855
	0.037252	-0.071857
	0.037252	-0.071868
	0.037252	-0.071857
	0.037252	-0.071856
	0.047406	-0.071927
	0.047406	-0.071925
	0.047406	-0.071911
	0.047406	-0.071914
	0.047406	-0.071904
	0.047406	-0.071905
	0.047406	-0.071892
	0.047406	-0.071874
	0.047406	-0.071868
	0.047406	-0.071881
	0.047406	-0.071881
	0.047406	-0.071890
	0.047406	-0.071876
	0.047406	-0.071877
	0.047406	-0.071874
	0.047406	-0.071881
	0.047406	-0.071889
	0.047406	-0.071875
	0.047406	-0.071874
	0.047406	-0.071878
	0.047406	-0.071871
	0.047406	-0.071867
	0.047406	-0.071865
	0.047406	-0.071858
	0.047406	-0.071863
	0.047406	-0.071860
	0.047406	-0.071853
	0.047406	-0.071858
	0.047406	-0.071858
	0.047406	-0.071855
	0.047406	-0.071855
	0.047406	-0.071840
	0.047406	-0.071853
	0.047406	-0.071860
	0.047406	-0.071851
	0.047406	-0.071880
	0.047406	-0.071856
	0.047406	-0.071875
	0.047406	-0.071870
	0.047406	-0.071856
	0.047406	-0.071860
	0.047406	-0.071854
	0.047406	-0.071866
	0.047406	-0.071851
	0.047406	-0.071862
	0.047406	-0.071848
	0.047406	-0.071852
	0.047406	-0.071858
	0.047406	-0.071855
	0.047406	-0.071864
	0.091204	-0.071775
	0.091204	-0.071761
	0.091204	-0.071765
	0.091204	-0.071758
	0.091204	-0.071798
	0.091204	-0.071769
	0.091204	-0.071766
	0.091204	-0.071736
	0.091204	-0.071741
	0.091204	-0.071737
	0.091204	-0.071747
	0.091204	-0.071731
	0.091204	-0.071737
	0.091204	-0.071728
	0.091204	-0.071749
	0.091204	-0.071725
	0.091204	-0.071733
	0.091204	-0.071742
	0.091204	-0.071735
	0.091204	-0.071732
	0.091204	-0.071738
	0.091204	-0.071755
	0.091204	-0.071760
	0.091204	-0.071753
	0.091204	-0.071753
	0.091204	-0.071754
	0.091204	-0.071732
	0.091204	-0.071734
	0.091204	-0.071730
	0.091204	-0.071726
	0.091204	-0.071726
	0.091204	-0.071728
	0.091204	-0.071723
	0.091204	-0.071706
	0.091204	-0.071700
	0.091204	-0.071707
	0.091204	-0.071699
	0.091204	-0.071701
	0.091204	-0.071709
	0.091204	-0.071722
	0.091204	-0.071704
	0.091204	-0.071702
	0.091204	-0.071706
	0.091204	-0.071707
	0.091204	-0.071697
	0.091204	-0.071713
	0.091204	-0.071718
	0.091204	-0.071727
	0.091204	-0.071694
	0.091204	-0.071694
	0.318707	-0.069482
	0.318707	-0.069495
	0.318707	-0.069490
	0.318707	-0.069489
	0.318707	-0.069463
	0.318707	-0.069449
	0.318707	-0.069452
	0.318707	-0.069450
	0.318707	-0.069461
	0.318707	-0.069477
	0.318707	-0.069468
	0.318707	-0.069454
	0.318707	-0.069452
	0.318707	-0.069471
	0.318707	-0.069470
	0.318707	-0.069463
	0.318707	-0.069438
	0.318707	-0.069450
	0.318707	-0.069453
	0.318707	-0.069449
	0.318707	-0.069453
	0.318707	-0.069444
	0.318707	-0.069452
	0.318707	-0.069454
	0.318707	-0.069452
	0.318707	-0.069443
	0.318707	-0.069442
	0.318707	-0.069422
	0.318707	-0.069431
	0.318707	-0.069442
	0.318707	-0.069431
	0.318707	-0.069457
	0.318707	-0.069461
	0.318707	-0.069452
	0.318707	-0.069447
	0.318707	-0.069458
	0.318707	-0.069454
	0.318707	-0.069437
	0.318707	-0.069435
	0.318707	-0.069465
	0.318707	-0.069446
	0.318707	-0.069475
	0.318707	-0.069464
	0.318707	-0.069481
	0.318707	-0.069459
	0.318707	-0.069440
	0.318707	-0.069455
	0.318707	-0.069458
	0.318707	-0.069446
	0.318707	-0.069450
	0.619306	-0.062652
	0.619306	-0.062641
	0.619306	-0.062644
	0.619306	-0.062638
	0.619306	-0.062605
	0.619306	-0.062608
	0.619306	-0.062593
	0.619306	-0.062589
	0.619306	-0.062567
	0.619306	-0.062566
	0.619306	-0.062524
	0.619306	-0.062510
	0.619306	-0.062492
	0.619306	-0.062455
	0.619306	-0.062429
	0.619306	-0.062403
	0.619306	-0.062369
	0.619306	-0.062330
	0.619306	-0.062321
	0.619306	-0.062299
	0.619306	-0.062234
	0.619306	-0.062206
	0.619306	-0.062172
	0.619306	-0.062114
	0.619306	-0.062101
	0.619306	-0.062053
	0.619306	-0.061999
	0.619306	-0.061957
	0.619306	-0.061917
	0.619306	-0.061881
	0.619306	-0.061852
	0.619306	-0.061790
	0.619306	-0.061776
	0.619306	-0.061727
	0.619306	-0.061686
	0.619306	-0.061631
	0.619306	-0.061625
	0.619306	-0.061558
	0.619306	-0.061549
	0.619306	-0.061522
	0.619306	-0.061491
	0.619306	-0.061439
	0.619306	-0.061392
	0.619306	-0.061374
	0.619306	-0.061358
	0.619306	-0.061311
	0.619306	-0.061259
	0.619306	-0.061224
	0.619306	-0.061207
	0.619306	-0.061175
	0.983798	-0.047940
	0.983798	-0.047929
	0.983798	-0.047881
	0.983798	-0.047857
	0.983798	-0.047838
	0.983798	-0.047811
	0.983798	-0.047803
	0.983798	-0.047791
	0.983798	-0.047780
	0.983798	-0.047762
	0.983798	-0.047759
	0.983798	-0.047726
	0.983798	-0.047706
	0.983798	-0.047698
	0.983798	-0.047710
	0.983798	-0.047717
	0.983798	-0.047702
	0.983798	-0.047687
	0.983798	-0.047688
	0.983798	-0.047664
	0.983798	-0.047645
	0.983798	-0.047641
	0.983798	-0.047632
	0.983798	-0.047640
	0.983798	-0.047624
	0.983798	-0.047610
	0.983798	-0.047609
	0.983798	-0.047583
	0.983798	-0.047589
	0.983798	-0.047604
	0.983798	-0.047573
	0.983798	-0.047575
	0.983798	-0.047583
	0.983798	-0.047565
	0.983798	-0.047541
	0.983798	-0.047559
	0.983798	-0.047547
	0.983798	-0.047514
	0.983798	-0.047522
	0.983798	-0.047541
	0.983798	-0.047515
	0.983798	-0.047530
	0.983798	-0.047537
	0.983798	-0.047508
	0.983798	-0.047490
	0.983798	-0.047496
	0.983798	-0.047500
	0.983798	-0.047505
	0.983798	-0.047510
	0.983798	-0.047505
	1.404778	-0.027900
	1.404778	-0.027901
	1.404778	-0.027872
	1.404778	-0.027863
	1.404778	-0.027845
	1.404778	-0.027853
	1.404778	-0.027851
	1.404778	-0.027849
	1.404778	-0.027822
	1.404778	-0.027809
	1.404778	-0.027797
	1.404778	-0.027799
	1.404778	-0.027798
	1.404778	-0.027788
	1.404778	-0.027800
	1.404778	-0.027814
	1.404778	-0.027800
	1.404778	-0.027794
	1.404778	-0.027797
	1.404778	-0.027792
	1.404778	-0.027782
	1.404778	-0.027778
	1.404778	-0.027777
	1.404778	-0.027785
	1.404778	-0.027771
	1.404778	-0.027816
	1.404778	-0.027788
	1.404778	-0.027794
	1.404778	-0.027792
	1.404778	-0.027775
	1.404778	-0.027764
	1.404778	-0.027762
	1.404778	-0.027756
	1.404778	-0.027751
	1.404778	-0.027757
	1.404778	-0.027751
	1.404778	-0.027747
	1.404778	-0.027777
	1.404778	-0.027742
	1.404778	-0.027733
	1.404778	-0.027741
	1.404778	-0.027742
	1.404778	-0.027743
	1.404778	-0.027760
	1.404778	-0.027758
	1.404778	-0.027729
	1.404778	-0.027737
	1.404778	-0.027739
	1.404778	-0.027729
	1.404778	-0.027732
	1.838790	-0.000712
	1.838790	-0.000769
	1.838790	-0.000716
	1.838790	-0.000679
	1.838790	-0.000712
	1.838790	-0.000673
	1.838790	-0.000680
	1.838790	-0.000673
	1.838790	-0.000667
	1.838790	-0.000677
	1.838790	-0.000699
	1.838790	-0.000672
	1.838790	-0.000681
	1.838790	-0.000674
	1.838790	-0.000672
	1.838790	-0.000684
	1.838790	-0.000640
	1.838790	-0.000671
	1.838790	-0.000677
	1.838790	-0.000626
	1.838790	-0.000638
	1.838790	-0.000613
	1.838790	-0.000638
	1.838790	-0.000660
	1.838790	-0.000659
	1.838790	-0.000615
	1.838790	-0.000590
	1.838790	-0.000576
	1.838790	-0.000618
	1.838790	-0.000568
	1.838790	-0.000579
	1.838790	-0.000588
	1.838790	-0.000600
	1.838790	-0.000578
	1.838790	-0.000560
	1.838790	-0.000560
	1.838790	-0.000622
	1.838790	-0.000572
	1.838790	-0.000601
	1.838790	-0.000585
	1.838790	-0.000563
	1.838790	-0.000552
	1.838790	-0.000529
	1.838790	-0.000577
	1.838790	-0.000563
	1.838790	-0.000595
	1.838790	-0.000592
	1.838790	-0.000600
	1.838790	-0.000571
	1.838790	-0.000531
	2.277058	0.032117
	2.277058	0.032266
	2.277058	0.032205
	2.277058	0.032113
	2.277058	0.032227
	2.277058	0.032153
	2.277058	0.032276
	2.277058	0.032157
	2.277058	0.032362
	2.277058	0.032160
	2.277058	0.032194
	2.277058	0.032248
	2.277058	0.032243
	2.277058	0.032318
	2.277058	0.032250
	2.277058	0.032330
	2.277058	0.032311
	2.277058	0.032257
	2.277058	0.032338
	2.277058	0.032210
	2.277058	0.032272
	2.277058	0.032230
	2.277058	0.032328
	2.277058	0.032262
	2.277058	0.032388
	2.277058	0.032338
	2.277058	0.032275
	2.277058	0.032335
	2.277058	0.032224
	2.277058	0.032344
	2.277058	0.032323
	2.277058	0.032328
	2.277058	0.032356
	2.277058	0.032386
	2.277058	0.032336
	2.277058	0.032366
	2.277058	0.032326
	2.277058	0.032357
	2.277058	0.032373
	2.277058	0.032301
	2.277058	0.032416
	2.277058	0.032367
	2.277058	0.032548
	2.277058	0.032422
	2.277058	0.032404
	2.277058	0.032490
	2.277058	0.032424
	2.277058	0.032367
	2.277058	0.032509
	2.277058	0.032441
	2.692849	0.068804
	2.692849	0.068872
	2.692849	0.068868
	2.692849	0.068877
	2.692849	0.068902
	2.692849	0.068891
	2.692849	0.068844
	2.692849	0.068778
	2.692849	0.068834
	2.692849	0.068992
	2.692849	0.068851
	2.692849	0.068857
	2.692849	0.068986
	2.692849	0.068932
	2.692849	0.068938
	2.692849	0.068983
	2.692849	0.068963
	2.692849	0.068984
	2.692849	0.068886
	2.692849	0.068987
	2.692849	0.068909
	2.692849	0.068942
	2.692849	0.068954
	2.692849	0.068938
	2.692849	0.069034
	2.692849	0.069004
	2.692849	0.068900
	2.692849	0.069145
	2.692849	0.068840
	2.692849	0.068976
	2.692849	0.068979
	2.692849	0.068986
	2.692849	0.069022
	2.692849	0.068926
	2.692849	0.069025
	2.692849	0.068844
	2.692849	0.068960
	2.692849	0.069062
	2.692849	0.068968
	2.692849	0.068902
	2.692849	0.069042
	2.692849	0.068881
	2.692849	0.069062
	2.692849	0.069039
	2.692849	0.069018
	2.692849	0.069129
	2.692849	0.069021
	2.692849	0.069051
	2.692849	0.069044
	2.692849	0.069084
	2.869922	0.086293
	2.869922	0.086329
	2.869922	0.086338
	2.869922	0.086282
	2.869922	0.086334
	2.869922	0.086429
	2.869922	0.086218
	2.869922	0.086496
	2.869922	0.086546
	2.869922	0.086386
	2.869922	0.086317
	2.869922	0.086357
	2.869922	0.086377
	2.869922	0.086409
	2.869922	0.086450
	2.869922	0.086270
	2.869922	0.086323
	2.869922	0.086429
	2.869922	0.086368
	2.869922	0.086371
	2.869922	0.086262
	2.869922	0.086521
	2.869922	0.086435
	2.869922	0.086462
	2.869922	0.086293
	2.869922	0.086317
	2.869922	0.086476
	2.869922	0.086342
	2.869922	0.086288
	2.869922	0.086405
	2.869922	0.086235
	2.869922	0.086432
	2.869922	0.086392
	2.869922	0.086205
	2.869922	0.086367
	2.869922	0.086259
	2.869922	0.086316
	2.869922	0.086315
	2.869922	0.086418
	2.869922	0.086336
	2.869922	0.086179
	2.869922	0.086354
	2.869922	0.086308
	2.869922	0.086247
	2.869922	0.086342
	2.869922	0.086122
	2.869922	0.086419
	2.869922	0.086531
	2.869922	0.086325
	2.869922	0.086474
	2.983200	0.097990
	2.983200	0.097904
	2.983200	0.097920
	2.983200	0.097853
	2.983200	0.098031
	2.983200	0.098052
	2.983200	0.097948
	2.983200	0.097963
	2.983200	0.097991
	2.983200	0.097930
	2.983200	0.098032
	2.983200	0.097910
	2.983200	0.098026
	2.983200	0.097820
	2.983200	0.097942
	2.983200	0.098050
	2.983200	0.098006
	2.983200	0.097796
	2.983200	0.098079
	2.983200	0.097911
	2.983200	0.097856
	2.983200	0.098097
	2.983200	0.097921
	2.983200	0.097988
	2.983200	0.097876
	2.983200	0.097945
	2.983200	0.097941
	2.983200	0.097703
	2.983200	0.098154
	2.983200	0.097938
	2.983200	0.098057
	2.983200	0.097933
	2.983200	0.097856
	2.983200	0.097894
	2.983200	0.097846
	2.983200	0.097927
	2.983200	0.097845
	2.983200	0.097821
	2.983200	0.097950
	2.983200	0.097821
	2.983200	0.097833
	2.983200	0.097911
	2.983200	0.098008
	2.983200	0.097861
	2.983200	0.098016
	2.983200	0.097975
	2.983200	0.097825
	2.983200	0.097563
	2.983200	0.097740
	2.983200	0.097842
	3.098475	0.109769
	3.098475	0.109740
	3.098475	0.109727
	3.098475	0.109943
	3.098475	0.109663
	3.098475	0.109687
	3.098475	0.109744
	3.098475	0.109675
	3.098475	0.109700
	3.098475	0.109736
	3.098475	0.109856
	3.098475	0.109727
	3.098475	0.109751
	3.098475	0.109810
	3.098475	0.109797
	3.098475	0.109835
	3.098475	0.109790
	3.098475	0.109790
	3.098475	0.109733
	3.098475	0.109848
	3.098475	0.109791
	3.098475	0.109811
	3.098475	0.109963
	3.098475	0.109736
	3.098475	0.109777
	3.098475	0.109839
	3.098475	0.109906
	3.098475	0.109808
	3.098475	0.109954
	3.098475	0.109907
	3.098475	0.109888
	3.098475	0.109734
	3.098475	0.109832
	3.098475	0.110031
	3.098475	0.109780
	3.098475	0.109823
	3.098475	0.109817
	3.098475	0.109736
	3.098475	0.109772
	3.098475	0.109775
	3.098475	0.109980
	3.098475	0.109902
	3.098475	0.109956
	3.098475	0.109726
	3.098475	0.109706
	3.098475	0.109800
	3.098475	0.109850
	3.098475	0.109698
	3.098475	0.109792
	3.098475	0.109857
	3.209719	0.121696
	3.209719	0.121894
	3.209719	0.121612
	3.209719	0.121752
	3.209719	0.121719
	3.209719	0.121526
	3.209719	0.121539
	3.209719	0.121683
	3.209719	0.121604
	3.209719	0.121688
	3.209719	0.121952
	3.209719	0.121980
	3.209719	0.121743
	3.209719	0.121755
	3.209719	0.121770
	3.209719	0.121688
	3.209719	0.121736
	3.209719	0.121689
	3.209719	0.121724
	3.209719	0.121838
	3.209719	0.121728
	3.209719	0.121579
	3.209719	0.121666
	3.209719	0.121791
	3.209719	0.121936
	3.209719	0.121716
	3.209719	0.121908
	3.209719	0.121680
	3.209719	0.121798
	3.209719	0.121698
	3.209719	0.121571
	3.209719	0.121757
	3.209719	0.121684
	3.209719	0.121807
	3.209719	0.121941
	3.209719	0.122119
	3.209719	0.122094
	3.209719	0.121719
	3.209719	0.121828
	3.209719	0.121813
	3.209719	0.121768
	3.209719	0.121853
	3.209719	0.121886
	3.209719	0.121914
	3.209719	0.121660
	3.209719	0.121802
	3.209719	0.121720
	3.209719	0.121711
	3.209719	0.121853
	3.209719	0.121724
	3.314664	0.133260
	3.314664	0.133339
	3.314664	0.133396
	3.314664	0.133365
	3.314664	0.133429
	3.314664	0.133501
	3.314664	0.133475
	3.314664	0.133405
	3.314664	0.133465
	3.314664	0.133487
	3.314664	0.133571
	3.314664	0.133437
	3.314664	0.133536
	3.314664	0.133407
	3.314664	0.133348
	3.314664	0.133607
	3.314664	0.133386
	3.314664	0.133365
	3.314664	0.133435
	3.314664	0.133584
	3.314664	0.133472
	3.314664	0.133307
	3.314664	0.133291
	3.314664	0.133492
	3.314664	0.133466
	3.314664	0.133577
	3.314664	0.133256
	3.314664	0.133368
	3.314664	0.133452
	3.314664	0.133423
	3.314664	0.133555
	3.314664	0.133545
	3.314664	0.133358
	3.314664	0.133523
	3.314664	0.133498
	3.314664	0.133334
	3.314664	0.133454
	3.314664	0.133426
	3.314664	0.133478
	3.314664	0.133448
	3.314664	0.133529
	3.314664	0.133483
	3.314664	0.133451
	3.314664	0.133409
	3.314664	0.133381
	3.314664	0.133345
	3.314664	0.133600
	3.314664	0.133539
	3.314664	0.133406
	3.314664	0.133437
	3.418023	0.144747
	3.418023	0.144766
	3.418023	0.144814
	3.418023	0.144703
	3.418023	0.144778
	3.418023	0.144820
	3.418023	0.144742
	3.418023	0.144868
	3.418023	0.144677
	3.418023	0.144879
	3.418023	0.144773
	3.418023	0.144799
	3.418023	0.144811
	3.418023	0.144775
	3.418023	0.144708
	3.418023	0.144626
	3.418023	0.144748
	3.418023	0.144592
	3.418023	0.144529
	3.418023	0.144532
	3.418023	0.144552
	3.418023	0.144707
	3.418023	0.144698
	3.418023	0.144727
	3.418023	0.144671
	3.418023	0.144569
	3.418023	0.144708
	3.418023	0.144775
	3.418023	0.144819
	3.418023	0.144554
	3.418023	0.144583
	3.418023	0.144818
	3.418023	0.144777
	3.418023	0.144674
	3.418023	0.144556
	3.418023	0.144689
	3.418023	0.144578
	3.418023	0.144539
	3.418023	0.144628
	3.418023	0.144645
	3.418023	0.144657
	3.418023	0.144663
	3.418023	0.144631
	3.418023	0.144737
	3.418023	0.144628
	3.418023	0.144688
	3.418023	0.144786
	3.418023	0.144834
	3.418023	0.144692
	3.418023	0.144748
	3.418023	0.144726
	3.418023	0.144676
	3.418023	0.144684
	3.418023	0.144746
	3.418023	0.144664
	3.418023	0.144632
	3.418023	0.144752
	3.418023	0.144731
	3.418023	0.144642
	3.418023	0.144575
	3.418023	0.144669
	3.418023	0.144701
	3.418023	0.144655
	3.418023	0.144778
	3.418023	0.144667
	3.418023	0.144780
	3.418023	0.144514
	3.418023	0.144593
	3.418023	0.144665
	3.418023	0.144706
	3.418023	0.144532
	3.418023	0.144600
	3.418023	0.144537
	3.418023	0.144488
	3.418023	0.144582
	3.418023	0.144684
	3.418023	0.144741
	3.418023	0.144495
	3.418023	0.144580
	3.418023	0.144558
	3.418023	0.144740
	3.418023	0.144657
	3.418023	0.144693
	3.418023	0.144695
	3.418023	0.144453
	3.418023	0.144469
	3.418023	0.144618
	3.418023	0.144535
	3.418023	0.144610
	3.418023	0.144538
	3.418023	0.144559
	3.418023	0.144514
	3.418023	0.144429
	3.418023	0.144585
	3.418023	0.144576
	3.418023	0.144680
	3.418023	0.144507
	3.418023	0.144463
	3.418023	0.144544
	3.418023	0.144593
	3.418023	0.144634
	3.418023	0.144531
	3.418023	0.144610
	3.418023	0.144602
	3.418023	0.144594
	3.418023	0.144457
	3.418023	0.144473
	3.418023	0.144372
	3.418023	0.144510
	3.418023	0.144444
	3.418023	0.144505
	3.418023	0.144465
	3.418023	0.144461
	3.418023	0.144464
	3.418023	0.144455
	3.418023	0.144500
	3.418023	0.144298
	3.418023	0.144634
	3.418023	0.144371
	3.418023	0.144508
	3.418023	0.144415
	3.418023	0.144498
	3.418023	0.144462
	3.418023	0.144442
	3.418023	0.144329
	3.418023	0.144397
	3.418023	0.144361
	3.418023	0.144401
	3.418023	0.144504
	3.418023	0.144282
	3.418023	0.144326
	3.418023	0.144395
	3.418023	0.144215
	3.418023	0.144416
	3.418023	0.144483
	3.320831	0.134997
	3.320831	0.134907
	3.320831	0.135083
	3.320831	0.135225
	3.320831	0.135090
	3.320831	0.135111
	3.320831	0.135230
	3.320831	0.135097
	3.320831	0.135248
	3.320831	0.135228
	3.320831	0.135240
	3.320831	0.135218
	3.320831	0.135268
	3.320831	0.135252
	3.320831	0.135166
	3.320831	0.135373
	3.320831	0.135062
	3.320831	0.135389
	3.320831	0.135218
	3.320831	0.135214
	3.320831	0.135321
	3.320831	0.135347
	3.320831	0.135357
	3.320831	0.135162
	3.320831	0.135292
	3.320831	0.135354
	3.320831	0.135304
	3.320831	0.135266
	3.320831	0.135404
	3.320831	0.135352
	3.320831	0.135208
	3.320831	0.135251
	3.320831	0.135315
	3.320831	0.135404
	3.320831	0.135438
	3.320831	0.135354
	3.320831	0.135324
	3.320831	0.135358
	3.320831	0.135377
	3.320831	0.135522
	3.320831	0.135294
	3.320831	0.135419
	3.320831	0.135492
	3.320831	0.135404
	3.320831	0.135390
	3.320831	0.135361
	3.320831	0.135263
	3.320831	0.135233
	3.320831	0.135409
	3.320831	0.135477
	3.203662	0.122518
	3.203662	0.122801
	3.203662	0.122401
	3.203662	0.122721
	3.203662	0.122592
	3.203662	0.122643
	3.203662	0.122839
	3.203662	0.122776
	3.203662	0.122685
	3.203662	0.122839
	3.203662	0.122789
	3.203662	0.122522
	3.203662	0.122806
	3.203662	0.122860
	3.203662	0.123089
	3.203662	0.122918
	3.203662	0.122778
	3.203662	0.122862
	3.203662	0.122847
	3.203662	0.122717
	3.203662	0.122762
	3.203662	0.122950
	3.203662	0.123008
	3.203662	0.122897
	3.203662	0.122915
	3.203662	0.122990
	3.203662	0.122779
	3.203662	0.122740
	3.203662	0.122880
	3.203662	0.123011
	3.203662	0.122855
	3.203662	0.123248
	3.203662	0.122676
	3.203662	0.122750
	3.203662	0.123052
	3.203662	0.123017
	3.203662	0.123016
	3.203662	0.122879
	3.203662	0.122871
	3.203662	0.122778
	3.203662	0.122719
	3.203662	0.122607
	3.203662	0.122910
	3.203662	0.122919
	3.203662	0.122810
	3.203662	0.122754
	3.203662	0.123069
	3.203662	0.122867
	3.203662	0.122928
	3.203662	0.122721
	3.075147	0.108980
	3.075147	0.109064
	3.075147	0.108966
	3.075147	0.109168
	3.075147	0.109195
	3.075147	0.109147
	3.075147	0.108990
	3.075147	0.109069
	3.075147	0.109148
	3.075147	0.108967
	3.075147	0.109190
	3.075147	0.109250
	3.075147	0.108935
	3.075147	0.109313
	3.075147	0.109198
	3.075147	0.109219
	3.075147	0.109192
	3.075147	0.109244
	3.075147	0.109207
	3.075147	0.109064
	3.075147	0.109352
	3.075147	0.109261
	3.075147	0.109141
	3.075147	0.109197
	3.075147	0.109328
	3.075147	0.109156
	3.075147	0.109213
	3.075147	0.109287
	3.075147	0.109434
	3.075147	0.109168
	3.075147	0.109290
	3.075147	0.109313
	3.075147	0.109120
	3.075147	0.109305
	3.075147	0.109315
	3.075147	0.109330
	3.075147	0.109262
	3.075147	0.109154
	3.075147	0.109345
	3.075147	0.109311
	3.075147	0.109274
	3.075147	0.109211
	3.075147	0.109341
	3.075147	0.109211
	3.075147	0.109268
	3.075147	0.109314
	3.075147	0.109390
	3.075147	0.109367
	3.075147	0.109312
	3.075147	0.109242
	2.941609	0.094943
	2.941609	0.094962
	2.941609	0.095023
	2.941609	0.094901
	2.941609	0.094893
	2.941609	0.094977
	2.941609	0.094987
	2.941609	0.094786
	2.941609	0.094929
	2.941609	0.095013
	2.941609	0.094837
	2.941609	0.095059
	2.941609	0.095035
	2.941609	0.094860
	2.941609	0.095007
	2.941609	0.095048
	2.941609	0.095028
	2.941609	0.094886
	2.941609	0.095096
	2.941609	0.095052
	2.941609	0.095063
	2.941609	0.095115
	2.941609	0.094923
	2.941609	0.095029
	2.941609	0.094812
	2.941609	0.094885
	2.941609	0.095135
	2.941609	0.095119
	2.941609	0.095002
	2.941609	0.094935
	2.941609	0.095046
	2.941609	0.095077
	2.941609	0.094850
	2.941609	0.095058
	2.941609	0.095026
	2.941609	0.094994
	2.941609	0.095082
	2.941609	0.095032
	2.941609	0.094988
	2.941609	0.094880
	2.941609	0.094863
	2.941609	0.095049
	2.941609	0.095099
	2.941609	0.095118
	2.941609	0.094965
	2.941609	0.095047
	2.941609	0.095105
	2.941609	0.094933
	2.941609	0.094928
	2.941609	0.094993
	2.801087	0.080899
	2.801087	0.080831
	2.801087	0.081118
	2.801087	0.080903
	2.801087	0.080800
	2.801087	0.080897
	2.801087	0.080982
	2.801087	0.080949
	2.801087	0.081062
	2.801087	0.081044
	2.801087	0.081115
	2.801087	0.081026
	2.801087	0.080949
	2.801087	0.080935
	2.801087	0.081013
	2.801087	0.080903
	2.801087	0.080970
	2.801087	0.081026
	2.801087	0.081027
	2.801087	0.081042
	2.801087	0.081096
	2.801087	0.081001
	2.801087	0.081069
	2.801087	0.081072
	2.801087	0.080745
	2.801087	0.081086
	2.801087	0.081156
	2.801087	0.081091
	2.801087	0.080790
	2.801087	0.080986
	2.801087	0.081052
	2.801087	0.080861
	2.801087	0.081066
	2.801087	0.080936
	2.801087	0.081044
	2.801087	0.080972
	2.801087	0.080958
	2.801087	0.081022
	2.801087	0.080808
	2.801087	0.081081
	2.801087	0.081018
	2.801087	0.081052
	2.801087	0.080988
	2.801087	0.080911
	2.801087	0.080895
	2.801087	0.080948
	2.801087	0.080905
	2.801087	0.080863
	2.801087	0.081011
	2.801087	0.080977
	2.570198	0.059589
	2.570198	0.059548
	2.570198	0.059590
	2.570198	0.059597
	2.570198	0.059535
	2.570198	0.059575
	2.570198	0.059683
	2.570198	0.059524
	2.570198	0.059560
	2.570198	0.059612
	2.570198	0.059672
	2.570198	0.059572
	2.570198	0.059466
	2.570198	0.059658
	2.570198	0.059598
	2.570198	0.059598
	2.570198	0.059603
	2.570198	0.059603
	2.570198	0.059523
	2.570198	0.059693
	2.570198	0.059511
	2.570198	0.059563
	2.570198	0.059529
	2.570198	0.059679
	2.570198	0.059683
	2.570198	0.059583
	2.570198	0.059600
	2.570198	0.059583
	2.570198	0.059528
	2.570198	0.059493
	2.570198	0.059609
	2.570198	0.059496
	2.570198	0.059562
	2.570198	0.059575
	2.570198	0.059549
	2.570198	0.059585
	2.570198	0.059523
	2.570198	0.059555
	2.570198	0.059519
	2.570198	0.059456
	2.570198	0.059463
	2.570198	0.059445
	2.570198	0.059548
	2.570198	0.059582
	2.570198	0.059455
	2.570198	0.059483
	2.570198	0.059455
	2.570198	0.059429
	2.570198	0.059499
	2.570198	0.059602
	2.099995	0.019999
	2.099995	0.020092
	2.099995	0.020143
	2.099995	0.020044
	2.099995	0.020092
	2.099995	0.020047
	2.099995	0.020109
	2.099995	0.020071
	2.099995	0.019968
	2.099995	0.020121
	2.099995	0.020091
	2.099995	0.020009
	2.099995	0.020108
	2.099995	0.020075
	2.099995	0.020102
	2.099995	0.020043
	2.099995	0.020061
	2.099995	0.020101
	2.099995	0.020018
	2.099995	0.020040
	2.099995	0.020087
	2.099995	0.020082
	2.099995	0.020106
	2.099995	0.020041
	2.099995	0.020000
	2.099995	0.020082
	2.099995	0.020099
	2.099995	0.020011
	2.099995	0.020101
	2.099995	0.019992
	2.099995	0.020049
	2.099995	0.020040
	2.099995	0.019990
	2.099995	0.020027
	2.099995	0.020093
	2.099995	0.020031
	2.099995	0.020011
	2.099995	0.020056
	2.099995	0.020109
	2.099995	0.019942
	2.099995	0.020011
	2.099995	0.019943
	2.099995	0.020079
	2.099995	0.020064
	2.099995	0.019913
	2.099995	0.020009
	2.099995	0.019953
	2.099995	0.019954
	2.099995	0.019927
	2.099995	0.019938
	1.583459	-0.015293
	1.583459	-0.015293
	1.583459	-0.015284
	1.583459	-0.015291
	1.583459	-0.015270
	1.583459	-0.015268
	1.583459	-0.015268
	1.583459	-0.015275
	1.583459	-0.015272
	1.583459	-0.015272
	1.583459	-0.015258
	1.583459	-0.015272
	1.583459	-0.015247
	1.583459	-0.015269
	1.583459	-0.015276
	1.583459	-0.015283
	1.583459	-0.015276
	1.583459	-0.015285
	1.583459	-0.015296
	1.583459	-0.015301
	1.583459	-0.015282
	1.583459	-0.015290
	1.583459	-0.015285
	1.583459	-0.015274
	1.583459	-0.015284
	1.583459	-0.015291
	1.583459	-0.015294
	1.583459	-0.015289
	1.583459	-0.015285
	1.583459	-0.015273
	1.583459	-0.015305
	1.583459	-0.015302
	1.583459	-0.015286
	1.583459	-0.015307
	1.583459	-0.015280
	1.583459	-0.015289
	1.583459	-0.015301
	1.583459	-0.015302
	1.583459	-0.015313
	1.583459	-0.015323
	1.583459	-0.015308
	1.583459	-0.015328
	1.583459	-0.015313
	1.583459	-0.015279
	1.583459	-0.015285
	1.583459	-0.015296
	1.583459	-0.015276
	1.583459	-0.015275
	1.583459	-0.015279
	1.583459	-0.015307
	1.113309	-0.039625
	1.113309	-0.039620
	1.113309	-0.039606
	1.113309	-0.039624
	1.113309	-0.039617
	1.113309	-0.039607
	1.113309	-0.039614
	1.113309	-0.039619
	1.113309	-0.039611
	1.113309	-0.039589
	1.113309	-0.039588
	1.113309	-0.039599
	1.113309	-0.039593
	1.113309	-0.039604
	1.113309	-0.039606
	1.113309	-0.039625
	1.113309	-0.039609
	1.113309	-0.039601
	1.113309	-0.039607
	1.113309	-0.039586
	1.113309	-0.039601
	1.113309	-0.039614
	1.113309	-0.039603
	1.113309	-0.039614
	1.113309	-0.039599
	1.113309	-0.039602
	1.113309	-0.039604
	1.113309	-0.039615
	1.113309	-0.039599
	1.113309	-0.039603
	1.113309	-0.039596
	1.113309	-0.039594
	1.113309	-0.039604
	1.113309	-0.039604
	1.113309	-0.039590
	1.113309	-0.039596
	1.113309	-0.039628
	1.113309	-0.039626
	1.113309	-0.039609
	1.113309	-0.039618
	1.113309	-0.039618
	1.113309	-0.039617
	1.113309	-0.039619
	1.113309	-0.039621
	1.113309	-0.039628
	1.113309	-0.039623
	1.113309	-0.039627
	1.113309	-0.039639
	1.113309	-0.039618
	1.113309	-0.039610
	0.678584	-0.055404
	0.678584	-0.055398
	0.678584	-0.055384
	0.678584	-0.055392
	0.678584	-0.055405
	0.678584	-0.055393
	0.678584	-0.055378
	0.678584	-0.055374
	0.678584	-0.055382
	0.678584	-0.055376
	0.678584	-0.055386
	0.678584	-0.055388
	0.678584	-0.055382
	0.678584	-0.055391
	0.678584	-0.055375
	0.678584	-0.055385
	0.678584	-0.055393
	0.678584	-0.055390
	0.678584	-0.055375
	0.678584	-0.055371
	0.678584	-0.055373
	0.678584	-0.055387
	0.678584	-0.055391
	0.678584	-0.055406
	0.678584	-0.055396
	0.678584	-0.055419
	0.678584	-0.055401
	0.678584	-0.055407
	0.678584	-0.055412
	0.678584	-0.055389
	0.678584	-0.055391
	0.678584	-0.055409
	0.678584	-0.055410
	0.678584	-0.055409
	0.678584	-0.055413
	0.678584	-0.055413
	0.678584	-0.055396
	0.678584	-0.055384
	0.678584	-0.055402
	0.678584	-0.055408
	0.678584	-0.055425
	0.678584	-0.055416
	0.678584	-0.055416
	0.678584	-0.055420
	0.678584	-0.055414
	0.678584	-0.055419
	0.678584	-0.055439
	0.678584	-0.055431
	0.678584	-0.055422
	0.678584	-0.055410
	0.330803	-0.063801
	0.330803	-0.063792
	0.330803	-0.063789
	0.330803	-0.063794
	0.330803	-0.063814
	0.330803	-0.063817
	0.330803	-0.063775
	0.330803	-0.063782
	0.330803	-0.063770
	0.330803	-0.063797
	0.330803	-0.063782
	0.330803	-0.063804
	0.330803	-0.063783
	0.330803	-0.063798
	0.330803	-0.063805
	0.330803	-0.063786
	0.330803	-0.063784
	0.330803	-0.063780
	0.330803	-0.063784
	0.330803	-0.063775
	0.330803	-0.063786
	0.330803	-0.063799
	0.330803	-0.063805
	0.330803	-0.063802
	0.330803	-0.063794
	0.330803	-0.063810
	0.330803	-0.063791
	0.330803	-0.063803
	0.330803	-0.063795
	0.330803	-0.063793
	0.330803	-0.063782
	0.330803	-0.063806
	0.330803	-0.063797
	0.330803	-0.063800
	0.330803	-0.063787
	0.330803	-0.063782
	0.330803	-0.063786
	0.330803	-0.063797
	0.330803	-0.063791
	0.330803	-0.063805
	0.330803	-0.063784
	0.330803	-0.063798
	0.330803	-0.063792
	0.330803	-0.063792
	0.330803	-0.063817
	0.330803	-0.063823
	0.330803	-0.063815
	0.330803	-0.063804
	0.330803	-0.063811
	0.330803	-0.063810
	0.113601	-0.066424
	0.113601	-0.066420
	0.113601	-0.066439
	0.113601	-0.066455
	0.113601	-0.066444
	0.113601	-0.066406
	0.113601	-0.066413
	0.113601	-0.066420
	0.113601	-0.066395
	0.113601	-0.066406
	0.113601	-0.066403
	0.113601	-0.066386
	0.113601	-0.066385
	0.113601	-0.066388
	0.113601	-0.066390
	0.113601	-0.066403
	0.113601	-0.066379
	0.113601	-0.066399
	0.113601	-0.066380
	0.113601	-0.066390
	0.113601	-0.066400
	0.113601	-0.066406
	0.113601	-0.066381
	0.113601	-0.066391
	0.113601	-0.066403
	0.113601	-0.066416
	0.113601	-0.066402
	0.113601	-0.066408
	0.113601	-0.066405
	0.113601	-0.066408
	0.113601	-0.066410
	0.113601	-0.066423
	0.113601	-0.066415
	0.113601	-0.066411
	0.113601	-0.066421
	0.113601	-0.066381
	0.113601	-0.066371
	0.113601	-0.066403
	0.113601	-0.066403
	0.113601	-0.066404
	0.113601	-0.066398
	0.113601	-0.066413
	0.113601	-0.066394
	0.113601	-0.066391
	0.113601	-0.066385
	0.113601	-0.066391
	0.113601	-0.066402
	0.113601	-0.066412
	0.113601	-0.066432
	0.113601	-0.066425
	0.048586	-0.069583
	0.048586	-0.069591
	0.048586	-0.069555
	0.048586	-0.069577
	0.048586	-0.069585
	0.048586	-0.069559
	0.048586	-0.069539
	0.048586	-0.069553
	0.048586	-0.069553
	0.048586	-0.069548
	0.048586	-0.069548
	0.048586	-0.069535
	0.048586	-0.069545
	0.048586	-0.069545
	0.048586	-0.069555
	0.048586	-0.069535
	0.048586	-0.069554
	0.048586	-0.069545
	0.048586	-0.069554
	0.048586	-0.069568
	0.048586	-0.069566
	0.048586	-0.069581
	0.048586	-0.069566
	0.048586	-0.069562
	0.048586	-0.069555
	0.048586	-0.069553
	0.048586	-0.069547
	0.048586	-0.069550
	0.048586	-0.069541
	0.048586	-0.069541
	0.048586	-0.069561
	0.048586	-0.069560
	0.048586	-0.069544
	0.048586	-0.069522
	0.048586	-0.069554
	0.048586	-0.069549
	0.048586	-0.069548
	0.048586	-0.069556
	0.048586	-0.069578
	0.048586	-0.069584
	0.048586	-0.069570
	0.048586	-0.069571
	0.048586	-0.069592
	0.048586	-0.069600
	0.048586	-0.069598
	0.048586	-0.069594
	0.048586	-0.069593
	0.048586	-0.069603
	0.048586	-0.069583
	0.048586	-0.069589
	0.039113	-0.070459
	0.039113	-0.070463
	0.039113	-0.070456
	0.039113	-0.070470
	0.039113	-0.070449
	0.039113	-0.070429
	0.039113	-0.070448
	0.039113	-0.070445
	0.039113	-0.070441
	0.039113	-0.070450
	0.039113	-0.070451
	0.039113	-0.070448
	0.039113	-0.070442
	0.039113	-0.070424
	0.039113	-0.070432
	0.039113	-0.070421
	0.039113	-0.070433
	0.039113	-0.070420
	0.039113	-0.070425
	0.039113	-0.070428
	0.039113	-0.070414
	0.039113	-0.070438
	0.039113	-0.070406
	0.039113	-0.070428
	0.039113	-0.070412
	0.039113	-0.070410
	0.039113	-0.070418
	0.039113	-0.070425
	0.039113	-0.070425
	0.039113	-0.070415
	0.039113	-0.070419
	0.039113	-0.070412
	0.039113	-0.070415
	0.039113	-0.070420
	0.039113	-0.070428
	0.039113	-0.070429
	0.039113	-0.070441
	0.039113	-0.070431
	0.039113	-0.070433
	0.039113	-0.070427
	0.039113	-0.070425
	0.039113	-0.070414
	0.039113	-0.070425
	0.039113	-0.070417
	0.039113	-0.070424
	0.039113	-0.070427
	0.039113	-0.070418
	0.039113	-0.070421
	0.039113	-0.070411
	0.039113	-0.070412
	0.039916	-0.070507
	0.039916	-0.070497
	0.039916	-0.070484
	0.039916	-0.070486
	0.039916	-0.070475
	0.039916	-0.070462
	0.039916	-0.070459
	0.039916	-0.070468
	0.039916	-0.070464
	0.039916	-0.070468
	0.039916	-0.070441
	0.039916	-0.070445
	0.039916	-0.070465
	0.039916	-0.070475
	0.039916	-0.070465
	0.039916	-0.070464
	0.039916	-0.070448
	0.039916	-0.070442
	0.039916	-0.070468
	0.039916	-0.070456
	0.039916	-0.070461
	0.039916	-0.070454
	0.039916	-0.070445
	0.039916	-0.070437
	0.039916	-0.070437
	0.039916	-0.070436
	0.039916	-0.070441
	0.039916	-0.070436
	0.039916	-0.070442
	0.039916	-0.070445
	0.039916	-0.070438
	0.039916	-0.070429
	0.039916	-0.070432
	0.039916	-0.070426
	0.039916	-0.070444
	0.039916	-0.070486
	0.039916	-0.070495
