# Supplementary material for: Contact-free experimental determination of the static flexural spring constant of cantilever sensors using a microfluidic force tool
Source: Beilstein J Nanotechnol. 2016 Mar 30;7:492–500. doi: 10.3762/bjnano.7.43 (PMC4901535; doi:10.3762/bjnano.7.43)
Supplement: File 1 — Raw data of thermal noise spectra, cantilever deflection under fluid flow, and sensitivity values σ1. [file Beilstein_J_Nanotechnol-07-492-s001.zip › Supporting information and raw data/OTESPA-R3-1-perpg2-h100_ch100_offset0_pvsPD.lvm]

	0.043865	-0.014659
	0.043865	-0.014476
	0.043865	-0.014485
	0.043865	-0.014544
	0.057627	-0.014282
	0.057627	-0.014283
	0.057627	-0.014196
	0.057627	-0.014305
	0.057627	-0.014295
	0.057627	-0.014245
	0.057627	-0.014156
	0.057627	-0.014178
	0.057627	-0.014264
	0.057627	-0.014315
	0.138949	-0.013021
	0.138949	-0.012862
	0.138949	-0.012808
	0.138949	-0.012882
	0.138949	-0.013018
	0.138949	-0.012930
	0.138949	-0.012870
	0.138949	-0.012865
	0.138949	-0.012721
	0.138949	-0.012413
	0.319383	-0.009924
	0.319383	-0.009954
	0.319383	-0.009954
	0.319383	-0.009754
	0.319383	-0.009740
	0.319383	-0.009731
	0.319383	-0.009778
	0.319383	-0.009729
	0.319383	-0.009741
	0.319383	-0.009792
	0.580805	0.001279
	0.580805	0.001155
	0.580805	0.001139
	0.580805	0.001154
	0.580805	0.001047
	0.580805	0.001116
	0.580805	0.001114
	0.580805	0.001143
	0.580805	0.001139
	0.580805	0.001318
	0.916163	0.022655
	0.916163	0.022548
	0.916163	0.022605
	0.916163	0.022570
	0.916163	0.022507
	0.916163	0.022492
	0.916163	0.022595
	0.916163	0.022628
	0.916163	0.022603
	0.916163	0.022671
	1.277452	0.055754
	1.277452	0.055599
	1.277452	0.055663
	1.277452	0.055640
	1.277452	0.055668
	1.277452	0.055664
	1.277452	0.055601
	1.277452	0.055471
	1.277452	0.055372
	1.277452	0.055314
	1.660885	0.098357
	1.660885	0.098242
	1.660885	0.098313
	1.660885	0.098419
	1.660885	0.098521
	1.660885	0.098710
	1.660885	0.098404
	1.660885	0.098003
	1.660885	0.098179
	1.660885	0.098420
	2.028068	0.145100
	2.028068	0.145158
	2.028068	0.145051
	2.028068	0.144993
	2.028068	0.144849
	2.028068	0.145033
	2.028068	0.144892
	2.028068	0.144719
	2.028068	0.144484
	2.028068	0.144164
	2.377136	0.194241
	2.377136	0.193903
	2.377136	0.193650
	2.377136	0.193374
	2.377136	0.193627
	2.377136	0.193585
	2.377136	0.193535
	2.377136	0.193545
	2.377136	0.193469
	2.377136	0.193346
	2.613006	0.227637
	2.613006	0.227291
	2.613006	0.227608
	2.613006	0.227507
	2.613006	0.227803
	2.613006	0.227734
	2.613006	0.227625
	2.613006	0.227538
	2.613006	0.227450
	2.613006	0.227408
	2.724426	0.244149
	2.724426	0.243761
	2.724426	0.243516
	2.724426	0.243305
	2.724426	0.243438
	2.724426	0.243482
	2.724426	0.243595
	2.724426	0.243403
	2.724426	0.243260
	2.724426	0.243313
	2.829657	0.259170
	2.829657	0.258679
	2.829657	0.258764
	2.829657	0.258649
	2.829657	0.258432
	2.829657	0.258423
	2.829657	0.258200
	2.829657	0.258039
	2.829657	0.257937
	2.829657	0.257446
	2.927325	0.272756
	2.927325	0.272811
	2.927325	0.272441
	2.927325	0.272436
	2.927325	0.272234
	2.927325	0.271985
	2.927325	0.271959
	2.927325	0.271602
	2.927325	0.271527
	2.927325	0.271550
	3.018421	0.284297
	3.018421	0.284178
	3.018421	0.284059
	3.018421	0.284125
	3.018421	0.283799
	3.018421	0.283700
	3.018421	0.283181
	3.018421	0.283167
	3.018421	0.282645
	3.018421	0.282583
	3.018421	0.282456
	3.018421	0.282391
	3.018421	0.282192
	3.018421	0.282071
	3.018421	0.281752
	3.018421	0.281831
	3.018421	0.281417
	3.018421	0.281357
	3.018421	0.280797
	3.018421	0.280705
	3.018421	0.280401
	3.018421	0.280322
	3.018421	0.280292
	3.018421	0.280251
	3.018421	0.280112
	3.018421	0.279978
	3.018421	0.279593
	3.018421	0.279292
	3.104168	0.292263
	3.104168	0.291958
	3.104168	0.291804
	3.104168	0.291846
	3.104168	0.291632
	3.104168	0.291105
	3.104168	0.290586
	3.104168	0.290774
	3.104168	0.290395
	3.104168	0.290510
	2.985050	0.272551
	2.985050	0.272476
	2.985050	0.272452
	2.985050	0.272088
	2.985050	0.271721
	2.985050	0.271798
	2.985050	0.271387
	2.985050	0.271303
	2.985050	0.271405
	2.985050	0.270852
	2.882687	0.254592
	2.882687	0.254404
	2.882687	0.254294
	2.882687	0.254277
	2.882687	0.253877
	2.882687	0.253332
	2.882687	0.253339
	2.882687	0.253470
	2.882687	0.253292
	2.882687	0.253288
	2.767166	0.236394
	2.767166	0.235764
	2.767166	0.235873
	2.767166	0.235771
	2.767166	0.235703
	2.767166	0.235656
	2.767166	0.235319
	2.767166	0.235028
	2.767166	0.235274
	2.767166	0.234967
	2.647046	0.217193
	2.647046	0.217051
	2.647046	0.216954
	2.647046	0.216671
	2.647046	0.216380
	2.647046	0.216276
	2.647046	0.215987
	2.647046	0.215861
	2.647046	0.215714
	2.647046	0.215242
	2.492698	0.194696
	2.492698	0.194684
	2.492698	0.194254
	2.492698	0.194191
	2.492698	0.193893
	2.492698	0.193470
	2.492698	0.193175
	2.492698	0.193046
	2.492698	0.193008
	2.492698	0.192798
	2.178892	0.153202
	2.178892	0.152749
	2.178892	0.152767
	2.178892	0.152613
	2.178892	0.152312
	2.178892	0.152326
	2.178892	0.152187
	2.178892	0.152171
	2.178892	0.151951
	2.178892	0.151805
	1.759726	0.103031
	1.759726	0.102899
	1.759726	0.102758
	1.759726	0.102945
	1.759726	0.102613
	1.759726	0.102310
	1.759726	0.102070
	1.759726	0.102304
	1.759726	0.101677
	1.759726	0.101386
	1.334565	0.059934
	1.334565	0.059807
	1.334565	0.059657
	1.334565	0.059539
	1.334565	0.059365
	1.334565	0.059282
	1.334565	0.059206
	1.334565	0.059101
	1.334565	0.058818
	1.334565	0.058742
	0.940116	0.027300
	0.940116	0.027260
	0.940116	0.027126
	0.940116	0.027148
	0.940116	0.027114
	0.940116	0.026933
	0.940116	0.026791
	0.940116	0.026727
	0.940116	0.026579
	0.940116	0.026537
	0.561800	0.008343
	0.561800	0.008335
	0.561800	0.008238
	0.561800	0.008243
	0.561800	0.008292
	0.561800	0.008052
	0.561800	0.008125
	0.561800	0.008220
	0.561800	0.008090
	0.561800	0.007894
	0.281249	0.000845
	0.281249	0.000738
	0.281249	0.000726
	0.281249	0.000562
	0.281249	0.000520
	0.281249	0.000655
	0.281249	0.000688
	0.281249	0.000662
	0.281249	0.000506
	0.281249	0.000243
	0.102956	0.000643
	0.102956	0.000652
	0.102956	0.000609
	0.102956	0.000494
	0.102956	0.000454
	0.102956	0.000341
	0.102956	0.000359
	0.102956	0.000381
	0.102956	0.000159
	0.102956	3.694096E-5
	0.049481	-0.002643
	0.049481	-0.002795
	0.049481	-0.002956
	0.049481	-0.003145
	0.049481	-0.003293
	0.049481	-0.003300
	0.049481	-0.003367
	0.049481	-0.003494
	0.049481	-0.003627
	0.049481	-0.003598
	0.041357	-0.004526
	0.041357	-0.004488
	0.041357	-0.004501
	0.041357	-0.004601
	0.041357	-0.004492
	0.041357	-0.004561
	0.041357	-0.004597
	0.041357	-0.004521
	0.041357	-0.004512
	0.041357	-0.004487
	0.042361	-0.005293
	0.042361	-0.005336
	0.042361	-0.005500
	0.042361	-0.005551
	0.042361	-0.005618
	0.042361	-0.005697
	0.042361	-0.005871
