# Supplementary material for: Contact-free experimental determination of the static flexural spring constant of cantilever sensors using a microfluidic force tool
Source: Beilstein J Nanotechnol. 2016 Mar 30;7:492–500. doi: 10.3762/bjnano.7.43 (PMC4901535; doi:10.3762/bjnano.7.43)
Supplement: File 1 — Raw data of thermal noise spectra, cantilever deflection under fluid flow, and sensitivity values σ1. [file Beilstein_J_Nanotechnol-07-492-s001.zip › Supporting information and raw data/perpg2_h100_ch100_FastscanC_chip10_Tune1_1.txt]

kHz	pm�/Hz
4.959106e+000	6.959399e-003
5.006790e+000	6.700413e-003
5.054474e+000	6.959399e-003
5.102158e+000	7.304090e-003
5.149841e+000	7.304090e-003
5.197525e+000	6.803233e-003
5.245209e+000	6.803233e-003
5.292893e+000	7.016252e-003
5.340576e+000	7.016252e-003
5.388260e+000	6.649205e-003
5.435943e+000	6.649205e-003
5.483627e+000	6.745838e-003
5.531311e+000	6.906271e-003
5.578995e+000	7.161110e-003
5.626679e+000	7.161110e-003
5.674362e+000	6.578088e-003
5.722046e+000	6.195150e-003
5.769729e+000	6.578088e-003
5.817413e+000	6.578320e-003
5.865097e+000	6.578320e-003
5.912781e+000	6.984390e-003
5.960464e+000	6.903797e-003
6.008148e+000	6.903797e-003
6.055832e+000	6.859095e-003
6.103516e+000	6.582397e-003
6.151199e+000	6.308640e-003
6.198883e+000	6.236548e-003
6.246567e+000	6.308640e-003
6.294250e+000	7.212104e-003
6.341934e+000	7.212104e-003
6.389618e+000	6.475872e-003
6.437302e+000	6.444020e-003
6.484985e+000	6.444020e-003
6.532669e+000	6.406581e-003
6.580353e+000	6.837212e-003
6.628037e+000	7.100885e-003
6.675720e+000	7.100885e-003
6.723404e+000	6.768450e-003
6.771088e+000	6.594161e-003
6.818771e+000	6.594161e-003
6.866455e+000	6.550624e-003
6.914139e+000	6.550624e-003
6.961822e+000	6.795111e-003
7.009506e+000	6.795111e-003
7.057190e+000	6.795111e-003
7.104874e+000	6.803146e-003
7.152558e+000	6.803146e-003
7.200241e+000	6.186885e-003
7.247925e+000	6.186885e-003
7.295608e+000	6.186885e-003
7.343292e+000	6.340121e-003
7.390976e+000	6.352259e-003
7.438660e+000	6.476448e-003
7.486343e+000	7.134755e-003
7.534027e+000	7.134755e-003
7.581711e+000	6.801048e-003
7.629395e+000	6.708892e-003
7.677078e+000	6.708892e-003
7.724762e+000	7.031057e-003
7.772446e+000	7.031057e-003
7.820129e+000	6.044856e-003
7.867813e+000	6.044856e-003
7.915497e+000	6.632500e-003
7.963181e+000	6.632500e-003
8.010864e+000	6.632500e-003
8.058548e+000	6.169453e-003
8.106231e+000	6.461601e-003
8.153916e+000	6.461601e-003
8.201600e+000	6.461601e-003
8.249283e+000	6.379851e-003
8.296967e+000	6.379851e-003
8.344650e+000	6.379851e-003
8.392334e+000	6.621211e-003
8.440018e+000	6.461069e-003
8.487701e+000	6.505052e-003
8.535385e+000	6.461069e-003
8.583068e+000	6.325366e-003
8.630753e+000	6.295572e-003
8.678437e+000	6.295572e-003
8.726120e+000	6.264341e-003
8.773804e+000	6.735878e-003
8.821487e+000	6.581214e-003
8.869171e+000	6.581214e-003
8.916854e+000	6.232512e-003
8.964539e+000	6.232512e-003
9.012223e+000	6.232512e-003
9.059906e+000	6.245752e-003
9.107590e+000	6.125698e-003
9.155273e+000	6.445922e-003
9.202957e+000	6.619866e-003
9.250641e+000	6.805059e-003
9.298324e+000	6.619866e-003
9.346008e+000	6.122784e-003
9.393692e+000	6.057366e-003
9.441376e+000	6.122784e-003
9.489060e+000	6.125126e-003
9.536743e+000	6.268428e-003
9.584427e+000	6.125126e-003
9.632110e+000	6.513708e-003
9.679794e+000	6.305347e-003
9.727479e+000	6.513708e-003
9.775162e+000	6.305814e-003
9.822846e+000	6.305814e-003
9.870529e+000	5.976823e-003
9.918213e+000	5.976823e-003
9.965896e+000	6.321268e-003
1.001358e+001	6.321268e-003
1.006126e+001	6.212360e-003
1.010895e+001	6.071874e-003
1.015663e+001	5.907808e-003
1.020432e+001	5.907808e-003
1.025200e+001	6.226884e-003
1.029968e+001	6.604710e-003
1.034737e+001	6.604710e-003
1.039505e+001	6.609230e-003
1.044273e+001	6.609230e-003
1.049042e+001	6.609230e-003
1.053810e+001	6.401793e-003
1.058579e+001	6.113577e-003
1.063347e+001	6.113577e-003
1.068115e+001	6.113577e-003
1.072884e+001	5.902916e-003
1.077652e+001	5.902916e-003
1.082420e+001	6.018022e-003
1.087189e+001	6.018022e-003
1.091957e+001	6.018022e-003
1.096725e+001	6.939849e-003
1.101494e+001	6.939849e-003
1.106262e+001	5.872300e-003
1.111031e+001	5.872300e-003
1.115799e+001	6.234787e-003
1.120567e+001	6.356959e-003
1.125336e+001	6.374393e-003
1.130104e+001	6.374393e-003
1.134872e+001	6.339871e-003
1.139641e+001	6.339871e-003
1.144409e+001	6.917457e-003
1.149178e+001	6.917457e-003
1.153946e+001	6.205904e-003
1.158714e+001	5.558867e-003
1.163483e+001	5.558867e-003
1.168251e+001	6.006012e-003
1.173019e+001	6.006012e-003
1.177788e+001	5.794463e-003
1.182556e+001	5.739554e-003
1.187325e+001	5.794463e-003
1.192093e+001	5.878504e-003
1.196861e+001	5.878504e-003
1.201630e+001	5.878504e-003
1.206398e+001	6.040896e-003
1.211166e+001	6.215822e-003
1.215935e+001	6.215822e-003
1.220703e+001	6.162831e-003
1.225471e+001	6.162831e-003
1.230240e+001	6.162831e-003
1.235008e+001	5.844426e-003
1.239777e+001	5.844426e-003
1.244545e+001	6.799248e-003
1.249313e+001	6.799248e-003
1.254082e+001	6.802434e-003
1.258850e+001	6.762613e-003
1.263618e+001	6.363103e-003
1.268387e+001	6.363103e-003
1.273155e+001	6.074263e-003
1.277924e+001	6.045440e-003
1.282692e+001	6.045440e-003
1.287460e+001	6.353745e-003
1.292229e+001	6.370013e-003
1.296997e+001	6.353745e-003
1.301765e+001	6.029900e-003
1.306534e+001	5.925227e-003
1.311302e+001	5.749057e-003
1.316071e+001	5.702942e-003
1.320839e+001	5.702942e-003
1.325607e+001	5.702942e-003
1.330376e+001	6.457334e-003
1.335144e+001	6.090902e-003
1.339912e+001	6.762042e-003
1.344681e+001	6.090902e-003
1.349449e+001	5.921883e-003
1.354218e+001	5.921883e-003
1.358986e+001	5.903249e-003
1.363754e+001	5.903249e-003
1.368523e+001	5.903249e-003
1.373291e+001	5.850311e-003
1.378059e+001	6.191018e-003
1.382828e+001	6.208028e-003
1.387596e+001	6.246642e-003
1.392364e+001	6.208028e-003
1.397133e+001	5.846373e-003
1.401901e+001	5.846373e-003
1.406670e+001	6.118515e-003
1.411438e+001	6.223826e-003
1.416206e+001	6.452593e-003
1.420975e+001	6.452593e-003
1.425743e+001	5.975200e-003
1.430512e+001	5.975200e-003
1.435280e+001	5.594547e-003
1.440048e+001	6.661449e-003
1.444817e+001	5.851452e-003
1.449585e+001	5.976039e-003
1.454353e+001	5.851452e-003
1.459122e+001	5.976039e-003
1.463890e+001	6.257805e-003
1.468658e+001	6.257805e-003
1.473427e+001	5.777757e-003
1.478195e+001	5.777757e-003
1.482964e+001	5.833571e-003
1.487732e+001	5.833571e-003
1.492500e+001	5.723880e-003
1.497269e+001	5.723880e-003
1.502037e+001	5.876822e-003
1.506805e+001	5.982890e-003
1.511574e+001	6.340975e-003
1.516342e+001	6.340975e-003
1.521111e+001	6.234147e-003
1.525879e+001	6.234147e-003
1.530647e+001	5.588531e-003
1.535416e+001	6.412283e-003
1.540184e+001	6.028783e-003
1.544952e+001	6.116950e-003
1.549721e+001	6.028783e-003
1.554489e+001	5.495734e-003
1.559258e+001	5.495734e-003
1.564026e+001	6.158477e-003
1.568794e+001	6.158477e-003
1.573563e+001	5.996374e-003
1.578331e+001	5.738356e-003
1.583099e+001	5.931952e-003
1.587868e+001	5.931952e-003
1.592636e+001	5.931952e-003
1.597404e+001	5.575501e-003
1.602173e+001	5.575501e-003
1.606941e+001	5.733904e-003
1.611710e+001	5.733904e-003
1.616478e+001	5.842548e-003
1.621246e+001	6.051069e-003
1.626015e+001	6.204180e-003
1.630783e+001	6.387863e-003
1.635551e+001	6.204180e-003
1.640320e+001	5.954449e-003
1.645088e+001	5.954449e-003
1.649857e+001	5.879323e-003
1.654625e+001	5.896761e-003
1.659393e+001	5.896761e-003
1.664162e+001	6.118691e-003
1.668930e+001	6.290379e-003
1.673698e+001	6.290379e-003
1.678467e+001	6.473329e-003
1.683235e+001	6.264611e-003
1.688004e+001	6.050270e-003
1.692772e+001	5.715903e-003
1.697540e+001	6.050270e-003
1.702309e+001	5.828383e-003
1.707077e+001	5.877203e-003
1.711845e+001	5.828383e-003
1.716614e+001	5.585839e-003
1.721382e+001	5.585839e-003
1.726151e+001	5.605447e-003
1.730919e+001	5.605447e-003
1.735687e+001	5.605447e-003
1.740456e+001	5.688905e-003
1.745224e+001	5.906023e-003
1.749992e+001	5.688905e-003
1.754761e+001	5.457389e-003
1.759529e+001	5.392618e-003
1.764297e+001	5.457389e-003
1.769066e+001	5.392618e-003
1.773834e+001	5.992550e-003
1.778603e+001	5.992550e-003
1.783371e+001	5.992550e-003
1.788139e+001	6.235593e-003
1.792908e+001	6.154622e-003
1.797676e+001	6.154622e-003
1.802445e+001	5.755204e-003
1.807213e+001	5.755204e-003
1.811981e+001	5.704173e-003
1.816750e+001	5.834502e-003
1.821518e+001	5.868913e-003
1.826286e+001	5.868913e-003
1.831055e+001	5.868913e-003
1.835823e+001	6.165689e-003
1.840591e+001	7.083187e-003
1.845360e+001	6.165689e-003
1.850128e+001	6.687645e-003
1.854896e+001	6.654009e-003
1.859665e+001	6.654009e-003
1.864433e+001	5.923989e-003
1.869202e+001	5.870399e-003
1.873970e+001	5.689934e-003
1.878738e+001	5.689934e-003
1.883507e+001	6.096303e-003
1.888275e+001	6.096303e-003
1.893044e+001	5.763620e-003
1.897812e+001	5.694717e-003
1.902580e+001	5.763620e-003
1.907349e+001	5.648197e-003
1.912117e+001	5.818454e-003
1.916885e+001	5.818454e-003
1.921654e+001	6.026436e-003
1.926422e+001	6.393433e-003
1.931190e+001	6.393433e-003
1.935959e+001	6.120473e-003
1.940727e+001	6.120473e-003
1.945496e+001	7.691778e-003
1.950264e+001	1.265334e-002
1.955032e+001	1.265334e-002
1.959801e+001	7.153775e-003
1.964569e+001	7.011269e-003
1.969338e+001	6.548569e-003
1.974106e+001	5.776891e-003
1.978874e+001	5.776891e-003
1.983643e+001	5.776891e-003
1.988411e+001	5.845822e-003
1.993179e+001	5.845822e-003
1.997948e+001	5.427121e-003
2.002716e+001	5.427121e-003
2.007484e+001	6.405887e-003
2.012253e+001	6.405887e-003
2.017021e+001	5.845235e-003
2.021789e+001	5.845235e-003
2.026558e+001	5.419131e-003
2.031326e+001	5.663789e-003
2.036095e+001	5.663789e-003
2.040863e+001	5.827929e-003
2.045631e+001	5.827929e-003
2.050400e+001	5.827929e-003
2.055168e+001	5.930410e-003
2.059937e+001	5.930410e-003
2.064705e+001	5.481440e-003
2.069473e+001	5.481440e-003
2.074242e+001	5.481440e-003
2.079010e+001	5.556814e-003
2.083778e+001	5.556814e-003
2.088547e+001	6.073914e-003
2.093315e+001	6.203854e-003
2.098084e+001	6.154866e-003
2.102852e+001	6.154866e-003
2.107620e+001	6.006216e-003
2.112389e+001	5.873221e-003
2.117157e+001	6.006216e-003
2.121925e+001	6.024367e-003
2.126694e+001	6.137045e-003
2.131462e+001	6.024367e-003
2.136230e+001	5.874621e-003
2.140999e+001	5.662994e-003
2.145767e+001	5.874621e-003
2.150536e+001	5.810616e-003
2.155304e+001	5.810616e-003
2.160072e+001	5.810616e-003
2.164841e+001	6.553558e-003
2.169609e+001	6.553558e-003
2.174377e+001	5.638876e-003
2.179146e+001	5.576251e-003
2.183914e+001	5.638876e-003
2.188683e+001	6.111902e-003
2.193451e+001	6.111902e-003
2.198219e+001	6.055552e-003
2.202988e+001	6.055552e-003
2.207756e+001	6.355400e-003
2.212524e+001	6.355400e-003
2.217293e+001	6.551425e-003
2.222061e+001	6.268345e-003
2.226829e+001	5.727959e-003
2.231598e+001	5.650965e-003
2.236366e+001	5.650965e-003
2.241135e+001	5.887936e-003
2.245903e+001	5.936314e-003
2.250671e+001	6.423610e-003
2.255440e+001	6.423610e-003
2.260208e+001	6.221456e-003
2.264977e+001	5.349566e-003
2.269745e+001	5.349566e-003
2.274513e+001	5.489116e-003
2.279282e+001	5.540244e-003
2.284050e+001	5.687991e-003
2.288818e+001	6.053233e-003
2.293587e+001	6.053233e-003
2.298355e+001	5.389017e-003
2.303123e+001	5.389017e-003
2.307892e+001	6.930358e-003
2.312660e+001	6.930358e-003
2.317429e+001	6.340245e-003
2.322197e+001	5.832094e-003
2.326965e+001	5.832094e-003
2.331734e+001	5.692723e-003
2.336502e+001	5.683671e-003
2.341271e+001	5.692723e-003
2.346039e+001	5.683671e-003
2.350807e+001	6.186437e-003
2.355576e+001	5.557665e-003
2.360344e+001	5.575524e-003
2.365112e+001	5.575524e-003
2.369881e+001	5.587451e-003
2.374649e+001	5.587451e-003
2.379417e+001	5.288958e-003
2.384186e+001	5.288958e-003
2.388954e+001	5.827378e-003
2.393722e+001	5.827378e-003
2.398491e+001	5.827378e-003
2.403259e+001	5.919734e-003
2.408028e+001	6.212385e-003
2.412796e+001	6.212385e-003
2.417564e+001	5.567744e-003
2.422333e+001	5.567744e-003
2.427101e+001	5.632374e-003
2.431870e+001	5.702731e-003
2.436638e+001	5.668453e-003
2.441406e+001	5.668453e-003
2.446175e+001	5.505263e-003
2.450943e+001	5.505263e-003
2.455711e+001	5.627899e-003
2.460480e+001	5.627899e-003
2.465248e+001	5.730869e-003
2.470016e+001	5.544263e-003
2.474785e+001	5.730869e-003
2.479553e+001	5.356158e-003
2.484322e+001	5.356158e-003
2.489090e+001	5.356158e-003
2.493858e+001	5.329692e-003
2.498627e+001	5.516057e-003
2.503395e+001	5.516057e-003
2.508163e+001	5.516057e-003
2.512932e+001	5.909706e-003
2.517700e+001	5.909706e-003
2.522469e+001	6.038062e-003
2.527237e+001	6.038062e-003
2.532005e+001	6.074840e-003
2.536774e+001	5.979950e-003
2.541542e+001	5.979950e-003
2.546310e+001	5.822194e-003
2.551079e+001	5.822194e-003
2.555847e+001	5.996414e-003
2.560616e+001	5.996414e-003
2.565384e+001	5.518041e-003
2.570152e+001	5.398002e-003
2.574921e+001	5.208537e-003
2.579689e+001	5.398002e-003
2.584457e+001	6.006501e-003
2.589226e+001	6.131513e-003
2.593994e+001	6.231287e-003
2.598763e+001	6.231287e-003
2.603531e+001	6.435962e-003
2.608299e+001	5.811416e-003
2.613068e+001	6.324833e-003
2.617836e+001	5.681943e-003
2.622604e+001	5.487780e-003
2.627373e+001	5.487780e-003
2.632141e+001	5.835075e-003
2.636910e+001	5.952458e-003
2.641678e+001	6.276478e-003
2.646446e+001	6.276478e-003
2.651215e+001	6.119175e-003
2.655983e+001	6.095037e-003
2.660751e+001	5.980209e-003
2.665520e+001	5.875385e-003
2.670288e+001	5.710519e-003
2.675056e+001	5.710519e-003
2.679825e+001	5.710519e-003
2.684593e+001	6.015634e-003
2.689362e+001	6.015634e-003
2.694130e+001	5.979731e-003
2.698898e+001	5.459042e-003
2.703667e+001	5.459042e-003
2.708435e+001	5.628281e-003
2.713204e+001	5.628281e-003
2.717972e+001	5.504181e-003
2.722740e+001	5.504181e-003
2.727509e+001	6.029307e-003
2.732277e+001	6.029307e-003
2.737045e+001	5.999142e-003
2.741814e+001	5.882852e-003
2.746582e+001	5.874316e-003
2.751350e+001	5.874316e-003
2.756119e+001	5.602663e-003
2.760887e+001	5.534600e-003
2.765655e+001	5.602663e-003
2.770424e+001	5.444142e-003
2.775192e+001	5.609265e-003
2.779961e+001	5.905025e-003
2.784729e+001	5.905025e-003
2.789497e+001	5.399378e-003
2.794266e+001	5.399378e-003
2.799034e+001	5.768728e-003
2.803803e+001	5.788624e-003
2.808571e+001	5.788624e-003
2.813339e+001	5.785487e-003
2.818108e+001	5.785487e-003
2.822876e+001	5.782487e-003
2.827644e+001	5.688339e-003
2.832413e+001	5.647198e-003
2.837181e+001	5.647198e-003
2.841949e+001	5.681869e-003
2.846718e+001	6.297419e-003
2.851486e+001	6.297419e-003
2.856254e+001	5.802444e-003
2.861023e+001	5.669767e-003
2.865791e+001	5.802444e-003
2.870560e+001	5.676030e-003
2.875328e+001	5.938208e-003
2.880096e+001	5.938208e-003
2.884865e+001	5.938208e-003
2.889633e+001	6.049699e-003
2.894402e+001	6.049699e-003
2.899170e+001	6.049699e-003
2.903938e+001	6.155343e-003
2.908707e+001	6.155343e-003
2.913475e+001	6.155343e-003
2.918243e+001	5.658913e-003
2.923012e+001	5.658913e-003
2.927780e+001	5.807274e-003
2.932548e+001	5.998459e-003
2.937317e+001	5.998459e-003
2.942085e+001	6.123491e-003
2.946854e+001	5.344180e-003
2.951622e+001	6.093357e-003
2.956390e+001	5.361400e-003
2.961159e+001	6.093357e-003
2.965927e+001	6.282453e-003
2.970696e+001	6.282453e-003
2.975464e+001	6.256395e-003
2.980232e+001	5.782887e-003
2.985001e+001	6.082879e-003
2.989769e+001	5.782887e-003
2.994537e+001	5.657589e-003
2.999306e+001	5.657589e-003
3.004074e+001	5.966348e-003
3.008842e+001	5.966348e-003
3.013611e+001	5.694644e-003
3.018379e+001	5.694644e-003
3.023148e+001	5.698854e-003
3.027916e+001	5.698854e-003
3.032684e+001	5.698854e-003
3.037453e+001	5.666115e-003
3.042221e+001	5.834406e-003
3.046989e+001	6.110676e-003
3.051758e+001	6.110676e-003
3.056526e+001	6.110676e-003
3.061295e+001	6.029710e-003
3.066063e+001	6.243445e-003
3.070831e+001	6.029710e-003
3.075600e+001	5.776591e-003
3.080368e+001	5.715169e-003
3.085136e+001	5.776591e-003
3.089905e+001	5.792878e-003
3.094673e+001	5.948235e-003
3.099442e+001	5.948235e-003
3.104210e+001	6.022748e-003
3.108978e+001	5.598271e-003
3.113747e+001	5.598271e-003
3.118515e+001	5.598271e-003
3.123283e+001	5.743236e-003
3.128052e+001	5.826484e-003
3.132820e+001	6.452896e-003
3.137588e+001	6.452896e-003
3.142357e+001	6.452896e-003
3.147125e+001	6.014925e-003
3.151894e+001	5.958488e-003
3.156662e+001	5.855629e-003
3.161430e+001	5.855629e-003
3.166199e+001	5.307076e-003
3.170967e+001	5.225469e-003
3.175736e+001	5.113896e-003
3.180504e+001	5.113896e-003
3.185272e+001	5.636939e-003
3.190041e+001	5.636939e-003
3.194809e+001	5.557442e-003
3.199577e+001	5.285290e-003
3.204346e+001	5.285290e-003
3.209114e+001	5.425587e-003
3.213882e+001	5.867213e-003
3.218651e+001	5.876588e-003
3.223419e+001	5.876588e-003
3.228187e+001	5.876588e-003
3.232956e+001	6.005578e-003
3.237724e+001	6.005578e-003
3.242493e+001	5.740909e-003
3.247261e+001	5.517896e-003
3.252029e+001	5.517896e-003
3.256798e+001	5.517896e-003
3.261566e+001	6.033734e-003
3.266335e+001	6.033734e-003
3.271103e+001	5.686422e-003
3.275871e+001	5.686422e-003
3.280640e+001	5.686422e-003
3.285408e+001	5.763845e-003
3.290177e+001	5.763845e-003
3.294945e+001	5.983749e-003
3.299713e+001	5.983749e-003
3.304482e+001	5.295006e-003
3.309250e+001	4.956394e-003
3.314018e+001	5.295006e-003
3.318787e+001	5.315916e-003
3.323555e+001	6.082478e-003
3.328323e+001	6.082478e-003
3.333092e+001	5.552362e-003
3.337860e+001	5.503057e-003
3.342629e+001	5.503057e-003
3.347397e+001	5.616537e-003
3.352165e+001	5.616537e-003
3.356934e+001	5.492122e-003
3.361702e+001	5.288163e-003
3.366470e+001	5.288163e-003
3.371239e+001	5.288163e-003
3.376007e+001	5.988859e-003
3.380775e+001	5.231045e-003
3.385544e+001	5.988859e-003
3.390312e+001	6.273970e-003
3.395080e+001	6.273970e-003
3.399849e+001	5.685800e-003
3.404617e+001	5.685800e-003
3.409386e+001	6.430985e-003
3.414154e+001	6.430985e-003
3.418922e+001	5.461387e-003
3.423691e+001	5.152430e-003
3.428459e+001	5.461387e-003
3.433227e+001	5.976849e-003
3.437996e+001	5.976849e-003
3.442764e+001	5.845951e-003
3.447533e+001	5.369566e-003
3.452301e+001	5.369566e-003
3.457070e+001	4.692737e-003
3.461838e+001	5.014213e-003
3.466606e+001	5.014213e-003
3.471375e+001	5.740508e-003
3.476143e+001	6.157719e-003
3.480911e+001	6.157719e-003
3.485680e+001	5.598238e-003
3.490448e+001	5.598238e-003
3.495216e+001	5.975043e-003
3.499985e+001	6.014767e-003
3.504753e+001	6.132124e-003
3.509521e+001	6.014767e-003
3.514290e+001	5.986632e-003
3.519058e+001	5.778853e-003
3.523827e+001	5.778853e-003
3.528595e+001	5.803183e-003
3.533363e+001	5.808508e-003
3.538132e+001	5.803183e-003
3.542900e+001	5.669759e-003
3.547668e+001	5.669759e-003
3.552437e+001	5.669759e-003
3.557205e+001	5.612259e-003
3.561973e+001	5.489245e-003
3.566742e+001	5.489245e-003
3.571510e+001	5.479039e-003
3.576279e+001	5.650989e-003
3.581047e+001	5.392379e-003
3.585816e+001	5.417978e-003
3.590584e+001	5.417978e-003
3.595352e+001	6.145701e-003
3.600121e+001	6.145701e-003
3.604889e+001	5.558619e-003
3.609657e+001	5.482604e-003
3.614426e+001	5.558619e-003
3.619194e+001	5.773449e-003
3.623963e+001	5.773449e-003
3.628731e+001	5.684700e-003
3.633499e+001	5.544206e-003
3.638268e+001	5.684700e-003
3.643036e+001	6.268972e-003
3.647804e+001	6.268972e-003
3.652573e+001	5.809666e-003
3.657341e+001	5.772851e-003
3.662109e+001	5.772851e-003
3.666878e+001	5.551706e-003
3.671646e+001	5.551706e-003
3.676414e+001	5.775496e-003
3.681183e+001	5.775496e-003
3.685951e+001	5.377329e-003
3.690720e+001	5.377329e-003
3.695488e+001	5.969403e-003
3.700256e+001	5.969403e-003
3.705025e+001	5.807140e-003
3.709793e+001	5.508861e-003
3.714561e+001	5.807140e-003
3.719330e+001	5.446477e-003
3.724098e+001	5.955853e-003
3.728866e+001	5.932481e-003
3.733635e+001	5.955853e-003
3.738403e+001	5.932481e-003
3.743172e+001	6.274652e-003
3.747940e+001	5.642788e-003
3.752709e+001	6.484695e-003
3.757477e+001	5.510550e-003
3.762245e+001	6.452039e-003
3.767014e+001	5.933372e-003
3.771782e+001	5.933372e-003
3.776550e+001	5.315746e-003
3.781319e+001	5.315746e-003
3.786087e+001	5.376052e-003
3.790855e+001	5.936605e-003
3.795624e+001	5.936605e-003
3.800392e+001	5.690731e-003
3.805161e+001	5.690731e-003
3.809929e+001	5.588123e-003
3.814697e+001	5.728963e-003
3.819466e+001	5.588123e-003
3.824234e+001	4.964699e-003
3.829002e+001	4.964699e-003
3.833771e+001	5.580310e-003
3.838539e+001	5.681926e-003
3.843307e+001	6.110724e-003
3.848076e+001	5.681926e-003
3.852844e+001	5.379412e-003
3.857612e+001	5.379412e-003
3.862381e+001	5.710071e-003
3.867149e+001	5.710071e-003
3.871918e+001	5.479577e-003
3.876686e+001	5.340471e-003
3.881454e+001	5.340471e-003
3.886223e+001	5.706820e-003
3.890991e+001	6.368187e-003
3.895760e+001	6.368187e-003
3.900528e+001	6.540922e-003
3.905296e+001	6.502001e-003
3.910065e+001	6.502001e-003
3.914833e+001	6.180769e-003
3.919602e+001	5.561065e-003
3.924370e+001	5.561065e-003
3.929138e+001	5.792605e-003
3.933907e+001	6.050277e-003
3.938675e+001	6.263089e-003
3.943443e+001	6.263089e-003
3.948212e+001	6.227531e-003
3.952980e+001	6.227531e-003
3.957748e+001	6.094522e-003
3.962517e+001	6.092598e-003
3.967285e+001	5.481785e-003
3.972054e+001	5.481785e-003
3.976822e+001	5.469435e-003
3.981590e+001	5.642592e-003
3.986359e+001	5.526744e-003
3.991127e+001	5.839452e-003
3.995895e+001	6.226370e-003
4.000664e+001	6.226370e-003
4.005432e+001	5.800206e-003
4.010200e+001	5.628719e-003
4.014969e+001	5.217736e-003
4.019737e+001	5.217736e-003
4.024505e+001	6.432743e-003
4.029274e+001	6.432743e-003
4.034042e+001	6.420981e-003
4.038811e+001	5.594251e-003
4.043579e+001	5.439974e-003
4.048348e+001	5.536404e-003
4.053116e+001	5.536404e-003
4.057884e+001	5.811732e-003
4.062653e+001	5.877027e-003
4.067421e+001	5.880109e-003
4.072189e+001	5.880109e-003
4.076958e+001	5.494716e-003
4.081726e+001	5.452427e-003
4.086495e+001	5.452427e-003
4.091263e+001	5.536708e-003
4.096031e+001	5.536708e-003
4.100800e+001	5.608117e-003
4.105568e+001	5.608117e-003
4.110336e+001	5.608117e-003
4.115105e+001	6.015141e-003
4.119873e+001	5.591758e-003
4.124641e+001	5.728325e-003
4.129410e+001	5.591758e-003
4.134178e+001	5.595366e-003
4.138946e+001	5.454366e-003
4.143715e+001	5.595366e-003
4.148483e+001	5.731139e-003
4.153252e+001	5.731139e-003
4.158020e+001	5.731139e-003
4.162788e+001	5.801892e-003
4.167557e+001	5.801892e-003
4.172325e+001	5.801892e-003
4.177093e+001	5.757284e-003
4.181862e+001	5.757284e-003
4.186630e+001	5.471184e-003
4.191398e+001	5.471184e-003
4.196167e+001	5.573866e-003
4.200936e+001	5.666666e-003
4.205704e+001	5.692031e-003
4.210472e+001	5.692031e-003
4.215241e+001	5.930179e-003
4.220009e+001	6.150634e-003
4.224777e+001	6.196476e-003
4.229546e+001	6.150634e-003
4.234314e+001	6.429581e-003
4.239082e+001	5.690509e-003
4.243851e+001	6.544463e-003
4.248619e+001	5.833747e-003
4.253388e+001	6.233865e-003
4.258156e+001	5.833747e-003
4.262924e+001	5.516924e-003
4.267693e+001	5.516924e-003
4.272461e+001	5.170266e-003
4.277229e+001	5.216195e-003
4.281998e+001	5.216195e-003
4.286766e+001	5.714592e-003
4.291534e+001	5.732490e-003
4.296303e+001	5.930177e-003
4.301071e+001	5.983326e-003
4.305839e+001	6.130406e-003
4.310608e+001	6.130406e-003
4.315376e+001	6.130406e-003
4.320145e+001	5.479872e-003
4.324913e+001	5.479872e-003
4.329681e+001	5.946819e-003
4.334450e+001	6.022491e-003
4.339218e+001	6.022491e-003
4.343986e+001	6.022491e-003
4.348755e+001	5.833877e-003
4.353523e+001	5.832911e-003
4.358292e+001	5.259424e-003
4.363060e+001	5.259424e-003
4.367829e+001	6.011996e-003
4.372597e+001	6.011996e-003
4.377365e+001	6.011996e-003
4.382134e+001	5.858694e-003
4.386902e+001	5.820673e-003
4.391670e+001	5.485127e-003
4.396439e+001	5.820673e-003
4.401207e+001	5.485127e-003
4.405975e+001	5.456753e-003
4.410744e+001	5.456753e-003
4.415512e+001	5.491218e-003
4.420280e+001	5.952631e-003
4.425049e+001	5.952631e-003
4.429817e+001	5.184474e-003
4.434586e+001	5.184474e-003
4.439354e+001	5.230055e-003
4.444122e+001	5.989196e-003
4.448891e+001	5.353099e-003
4.453659e+001	5.353099e-003
4.458427e+001	5.115342e-003
4.463196e+001	5.115342e-003
4.467964e+001	5.645404e-003
4.472732e+001	5.743260e-003
4.477501e+001	5.822060e-003
4.482269e+001	5.822060e-003
4.487038e+001	5.576358e-003
4.491806e+001	5.551979e-003
4.496574e+001	5.274027e-003
4.501343e+001	5.237778e-003
4.506111e+001	5.237778e-003
4.510880e+001	5.237778e-003
4.515648e+001	5.450890e-003
4.520416e+001	5.592039e-003
4.525185e+001	5.660729e-003
4.529953e+001	5.742119e-003
4.534721e+001	5.742119e-003
4.539490e+001	5.634068e-003
4.544258e+001	5.634068e-003
4.549027e+001	5.636100e-003
4.553795e+001	5.636100e-003
4.558563e+001	5.578479e-003
4.563332e+001	5.578479e-003
4.568100e+001	6.082055e-003
4.572868e+001	6.082055e-003
4.577637e+001	5.523826e-003
4.582405e+001	5.523826e-003
4.587173e+001	5.523826e-003
4.591942e+001	5.907041e-003
4.596710e+001	5.934723e-003
4.601479e+001	6.009626e-003
4.606247e+001	6.205433e-003
4.611015e+001	6.205433e-003
4.615784e+001	5.686696e-003
4.620552e+001	5.686696e-003
4.625320e+001	6.054786e-003
4.630089e+001	6.054786e-003
4.634857e+001	5.578654e-003
4.639625e+001	5.578654e-003
4.644394e+001	5.630063e-003
4.649162e+001	5.630063e-003
4.653930e+001	5.501479e-003
4.658699e+001	5.474841e-003
4.663468e+001	5.501479e-003
4.668236e+001	5.305981e-003
4.673004e+001	5.598616e-003
4.677773e+001	6.050738e-003
4.682541e+001	6.214651e-003
4.687309e+001	6.214651e-003
4.692078e+001	6.214651e-003
4.696846e+001	6.140309e-003
4.701614e+001	6.000622e-003
4.706383e+001	6.000622e-003
4.711151e+001	5.861092e-003
4.715920e+001	5.747193e-003
4.720688e+001	5.747193e-003
4.725456e+001	5.747193e-003
4.730225e+001	5.793113e-003
4.734993e+001	5.769768e-003
4.739761e+001	5.769768e-003
4.744530e+001	5.551509e-003
4.749298e+001	5.505562e-003
4.754066e+001	5.480746e-003
4.758835e+001	5.480746e-003
4.763603e+001	5.888510e-003
4.768371e+001	5.888510e-003
4.773140e+001	5.758807e-003
4.777908e+001	5.718213e-003
4.782677e+001	5.718213e-003
4.787445e+001	5.718213e-003
4.792213e+001	5.567055e-003
4.796982e+001	5.759909e-003
4.801750e+001	5.641762e-003
4.806519e+001	5.848265e-003
4.811287e+001	5.721397e-003
4.816055e+001	5.811041e-003
4.820824e+001	5.811041e-003
4.825592e+001	6.101421e-003
4.830361e+001	6.101421e-003
4.835129e+001	6.098861e-003
4.839897e+001	5.969833e-003
4.844666e+001	5.221030e-003
4.849434e+001	5.221030e-003
4.854202e+001	5.480787e-003
4.858971e+001	5.687636e-003
4.863739e+001	5.814187e-003
4.868507e+001	5.826258e-003
4.873276e+001	5.814187e-003
4.878044e+001	5.826258e-003
4.882813e+001	5.524992e-003
4.887581e+001	5.524992e-003
4.892349e+001	5.349225e-003
4.897118e+001	5.349225e-003
4.901886e+001	5.699532e-003
4.906654e+001	6.250401e-003
4.911423e+001	6.250401e-003
4.916191e+001	5.556482e-003
4.920959e+001	5.060092e-003
4.925728e+001	5.556482e-003
4.930496e+001	5.858662e-003
4.935264e+001	6.170929e-003
4.940033e+001	6.170929e-003
4.944801e+001	5.612369e-003
4.949570e+001	5.612369e-003
4.954338e+001	5.927193e-003
4.959106e+001	6.003189e-003
4.963875e+001	6.004491e-003
4.968643e+001	6.003189e-003
4.973412e+001	5.779031e-003
4.978180e+001	5.331558e-003
4.982948e+001	5.331558e-003
4.987717e+001	5.331558e-003
4.992485e+001	5.245460e-003
4.997254e+001	5.677561e-003
5.002022e+001	5.768821e-003
5.006790e+001	5.768821e-003
5.011559e+001	5.889354e-003
5.016327e+001	6.094423e-003
5.021095e+001	6.094423e-003
5.025864e+001	5.718167e-003
5.030632e+001	5.481720e-003
5.035400e+001	5.718167e-003
5.040169e+001	5.846314e-003
5.044937e+001	5.869246e-003
5.049705e+001	6.148824e-003
5.054474e+001	6.228555e-003
5.059242e+001	6.148824e-003
5.064011e+001	6.185726e-003
5.068779e+001	5.889552e-003
5.073547e+001	6.071546e-003
5.078316e+001	5.889552e-003
5.083084e+001	5.512373e-003
5.087852e+001	5.447376e-003
5.092621e+001	5.409316e-003
5.097389e+001	5.325110e-003
5.102157e+001	5.409316e-003
5.106926e+001	5.325110e-003
5.111695e+001	5.362734e-003
5.116463e+001	5.248132e-003
5.121231e+001	5.362734e-003
5.126000e+001	5.911260e-003
5.130768e+001	5.911260e-003
5.135536e+001	5.730964e-003
5.140305e+001	5.730964e-003
5.145073e+001	6.048145e-003
5.149841e+001	6.590693e-003
5.154610e+001	6.590693e-003
5.159378e+001	6.523900e-003
5.164146e+001	6.144795e-003
5.168915e+001	6.144795e-003
5.173683e+001	5.682183e-003
5.178452e+001	5.682183e-003
5.183220e+001	5.692517e-003
5.187988e+001	6.047939e-003
5.192757e+001	6.047939e-003
5.197525e+001	5.988626e-003
5.202293e+001	5.985977e-003
5.207062e+001	5.590441e-003
5.211830e+001	5.365082e-003
5.216598e+001	5.365082e-003
5.221367e+001	5.340560e-003
5.226135e+001	5.152016e-003
5.230904e+001	5.152016e-003
5.235672e+001	5.759953e-003
5.240440e+001	5.759953e-003
5.245209e+001	5.759953e-003
5.249977e+001	5.735186e-003
5.254745e+001	5.623371e-003
5.259514e+001	5.594350e-003
5.264282e+001	5.594350e-003
5.269051e+001	5.594350e-003
5.273819e+001	5.493880e-003
5.278588e+001	5.598283e-003
5.283356e+001	5.598283e-003
5.288124e+001	6.421305e-003
5.292893e+001	6.421305e-003
5.297661e+001	6.421305e-003
5.302429e+001	5.969612e-003
5.307198e+001	5.841965e-003
5.311966e+001	5.584742e-003
5.316734e+001	5.584742e-003
5.321503e+001	5.584742e-003
5.326271e+001	5.498592e-003
5.331039e+001	5.498592e-003
5.335808e+001	5.536423e-003
5.340576e+001	5.602620e-003
5.345345e+001	5.602620e-003
5.350113e+001	5.701876e-003
5.354881e+001	5.943849e-003
5.359650e+001	5.943849e-003
5.364418e+001	5.342596e-003
5.369186e+001	5.342596e-003
5.373955e+001	5.388454e-003
5.378723e+001	5.388454e-003
5.383491e+001	5.324464e-003
5.388260e+001	5.324464e-003
5.393028e+001	5.720116e-003
5.397796e+001	5.875745e-003
5.402565e+001	5.720116e-003
5.407333e+001	5.713694e-003
5.412102e+001	5.570727e-003
5.416870e+001	5.713694e-003
5.421639e+001	5.478372e-003
5.426407e+001	5.474955e-003
5.431175e+001	5.346511e-003
5.435944e+001	5.346511e-003
5.440712e+001	5.924718e-003
5.445480e+001	6.013902e-003
5.450249e+001	5.924718e-003
5.455017e+001	5.507730e-003
5.459786e+001	5.507730e-003
5.464554e+001	5.812060e-003
5.469322e+001	5.812060e-003
5.474091e+001	5.661954e-003
5.478859e+001	5.337029e-003
5.483627e+001	5.337029e-003
5.488396e+001	5.337029e-003
5.493164e+001	5.601969e-003
5.497932e+001	5.601969e-003
5.502701e+001	5.240040e-003
5.507469e+001	5.216591e-003
5.512237e+001	5.216591e-003
5.517006e+001	5.390612e-003
5.521774e+001	5.698889e-003
5.526543e+001	5.769076e-003
5.531311e+001	5.879901e-003
5.536079e+001	6.005649e-003
5.540848e+001	6.065691e-003
5.545616e+001	6.065691e-003
5.550384e+001	5.772261e-003
5.555153e+001	5.772261e-003
5.559921e+001	5.772261e-003
5.564689e+001	5.579612e-003
5.569458e+001	5.579612e-003
5.574227e+001	5.881456e-003
5.578995e+001	5.881456e-003
5.583763e+001	5.664909e-003
5.588532e+001	5.270093e-003
5.593300e+001	5.270093e-003
5.598068e+001	5.721393e-003
5.602837e+001	5.721393e-003
5.607605e+001	5.651155e-003
5.612373e+001	5.651155e-003
5.617142e+001	5.426055e-003
5.621910e+001	5.694085e-003
5.626679e+001	5.497748e-003
5.631447e+001	5.694085e-003
5.636215e+001	5.701998e-003
5.640984e+001	5.701998e-003
5.645752e+001	5.395453e-003
5.650520e+001	5.246119e-003
5.655289e+001	5.246119e-003
5.660057e+001	5.246119e-003
5.664825e+001	6.032005e-003
5.669594e+001	6.227995e-003
5.674362e+001	6.227995e-003
5.679130e+001	5.174122e-003
5.683899e+001	4.983185e-003
5.688667e+001	4.983185e-003
5.693436e+001	4.983185e-003
5.698204e+001	5.920801e-003
5.702972e+001	5.920801e-003
5.707741e+001	5.630011e-003
5.712509e+001	5.023764e-003
5.717277e+001	5.023764e-003
5.722046e+001	6.253330e-003
5.726814e+001	6.253330e-003
5.731583e+001	5.754636e-003
5.736351e+001	5.348129e-003
5.741120e+001	5.352835e-003
5.745888e+001	5.273622e-003
5.750656e+001	5.352835e-003
5.755425e+001	5.806789e-003
5.760193e+001	5.806789e-003
5.764961e+001	5.562111e-003
5.769730e+001	5.462056e-003
5.774498e+001	5.562111e-003
5.779266e+001	5.768918e-003
5.784035e+001	5.768918e-003
5.788803e+001	5.768918e-003
5.793571e+001	6.413401e-003
5.798340e+001	6.413401e-003
5.803108e+001	5.735652e-003
5.807877e+001	5.717525e-003
5.812645e+001	5.478082e-003
5.817413e+001	5.478082e-003
5.822182e+001	5.473840e-003
5.826950e+001	5.564020e-003
5.831718e+001	5.564020e-003
5.836487e+001	5.715828e-003
5.841255e+001	5.802189e-003
5.846023e+001	5.880024e-003
5.850792e+001	5.880024e-003
5.855560e+001	5.880024e-003
5.860329e+001	6.007786e-003
5.865097e+001	6.035826e-003
5.869865e+001	6.007786e-003
5.874634e+001	6.011397e-003
5.879402e+001	5.888708e-003
5.884171e+001	5.710896e-003
5.888939e+001	5.375154e-003
5.893707e+001	5.402467e-003
5.898476e+001	5.402467e-003
5.903244e+001	6.004218e-003
5.908013e+001	6.237798e-003
5.912781e+001	6.004218e-003
5.917549e+001	6.063359e-003
5.922318e+001	5.757489e-003
5.927086e+001	5.551106e-003
5.931854e+001	5.260090e-003
5.936623e+001	5.260090e-003
5.941391e+001	5.749653e-003
5.946159e+001	5.850134e-003
5.950928e+001	5.788102e-003
5.955696e+001	5.788102e-003
5.960464e+001	5.640178e-003
5.965233e+001	5.640178e-003
5.970001e+001	5.737077e-003
5.974770e+001	6.008184e-003
5.979538e+001	6.008184e-003
5.984306e+001	5.909825e-003
5.989075e+001	5.786159e-003
5.993843e+001	5.786159e-003
5.998611e+001	5.786159e-003
6.003380e+001	5.209614e-003
6.008148e+001	5.209614e-003
6.012916e+001	5.239320e-003
6.017685e+001	5.499887e-003
6.022453e+001	5.576360e-003
6.027222e+001	5.575821e-003
6.031990e+001	5.575821e-003
6.036759e+001	5.343124e-003
6.041527e+001	5.343124e-003
6.046295e+001	5.577765e-003
6.051064e+001	5.691895e-003
6.055832e+001	5.691895e-003
6.060600e+001	5.734220e-003
6.065369e+001	5.837427e-003
6.070137e+001	5.932780e-003
6.074905e+001	5.837427e-003
6.079674e+001	5.932780e-003
6.084442e+001	6.396015e-003
6.089211e+001	6.396015e-003
6.093979e+001	5.194768e-003
6.098747e+001	5.194768e-003
6.103516e+001	5.802453e-003
6.108284e+001	6.350304e-003
6.113052e+001	6.350304e-003
6.117821e+001	6.176146e-003
6.122589e+001	5.877816e-003
6.127357e+001	5.877816e-003
6.132126e+001	5.877816e-003
6.136894e+001	5.746899e-003
6.141663e+001	5.746899e-003
6.146431e+001	5.707322e-003
6.151199e+001	5.707322e-003
6.155968e+001	5.557853e-003
6.160736e+001	5.557853e-003
6.165504e+001	5.557853e-003
6.170273e+001	6.276414e-003
6.175041e+001	6.276414e-003
6.179809e+001	6.225146e-003
6.184578e+001	6.003323e-003
6.189346e+001	5.738469e-003
6.194115e+001	5.621149e-003
6.198883e+001	5.621149e-003
6.203652e+001	5.355338e-003
6.208420e+001	4.939491e-003
6.213188e+001	4.939491e-003
6.217957e+001	5.786135e-003
6.222725e+001	5.958927e-003
6.227493e+001	6.015809e-003
6.232262e+001	6.015809e-003
6.237030e+001	6.047625e-003
6.241798e+001	6.217395e-003
6.246567e+001	6.217395e-003
6.251335e+001	5.710704e-003
6.256104e+001	5.710704e-003
6.260872e+001	5.624349e-003
6.265640e+001	5.878449e-003
6.270409e+001	5.504875e-003
6.275177e+001	5.776260e-003
6.279945e+001	5.776260e-003
6.284714e+001	5.776260e-003
6.289482e+001	5.133240e-003
6.294250e+001	5.133240e-003
6.299019e+001	5.139037e-003
6.303787e+001	5.416083e-003
6.308555e+001	5.416083e-003
6.313324e+001	5.645951e-003
6.318092e+001	5.645951e-003
6.322861e+001	5.645951e-003
6.327629e+001	5.626284e-003
6.332398e+001	5.595173e-003
6.337166e+001	5.626284e-003
6.341934e+001	5.759343e-003
6.346703e+001	5.841548e-003
6.351471e+001	5.759343e-003
6.356239e+001	5.783065e-003
6.361008e+001	5.605522e-003
6.365776e+001	5.605522e-003
6.370545e+001	5.554254e-003
6.375313e+001	5.554254e-003
6.380081e+001	5.532580e-003
6.384850e+001	5.532580e-003
6.389618e+001	5.151623e-003
6.394386e+001	5.151623e-003
6.399155e+001	5.958194e-003
6.403923e+001	5.958194e-003
6.408691e+001	5.380975e-003
6.413460e+001	5.175330e-003
6.418228e+001	5.175330e-003
6.422996e+001	5.345157e-003
6.427765e+001	6.239144e-003
6.432533e+001	5.662034e-003
6.437302e+001	5.662034e-003
6.442070e+001	5.662034e-003
6.446838e+001	5.784002e-003
6.451607e+001	5.784002e-003
6.456375e+001	5.536072e-003
6.461143e+001	5.536072e-003
6.465912e+001	5.641164e-003
6.470680e+001	5.698514e-003
6.475448e+001	5.987158e-003
6.480217e+001	5.698514e-003
6.484985e+001	5.042493e-003
6.489754e+001	5.042493e-003
6.494522e+001	5.456577e-003
6.499291e+001	5.820693e-003
6.504059e+001	5.820693e-003
6.508827e+001	5.471709e-003
6.513596e+001	5.471709e-003
6.518364e+001	5.471709e-003
6.523132e+001	6.301619e-003
6.527901e+001	5.333057e-003
6.532669e+001	5.212440e-003
6.537438e+001	5.013447e-003
6.542206e+001	5.212440e-003
6.546974e+001	5.369566e-003
6.551743e+001	5.369566e-003
6.556511e+001	5.338629e-003
6.561280e+001	5.338629e-003
6.566048e+001	5.393801e-003
6.570816e+001	5.421954e-003
6.575584e+001	5.496871e-003
6.580353e+001	5.496871e-003
6.585121e+001	5.870442e-003
6.589890e+001	5.903230e-003
6.594658e+001	5.984231e-003
6.599427e+001	6.606080e-003
6.604195e+001	6.606080e-003
6.608963e+001	6.063053e-003
6.613731e+001	5.706028e-003
6.618500e+001	5.706028e-003
6.623268e+001	6.044367e-003
6.628037e+001	6.358236e-003
6.632805e+001	6.358236e-003
6.637573e+001	6.358236e-003
6.642341e+001	5.956686e-003
6.647110e+001	6.429161e-003
6.651878e+001	5.987316e-003
6.656647e+001	6.206838e-003
6.661415e+001	6.206838e-003
6.666184e+001	6.206838e-003
6.670952e+001	5.739478e-003
6.675720e+001	5.721778e-003
6.680488e+001	5.739478e-003
6.685257e+001	5.860448e-003
6.690025e+001	5.860448e-003
6.694794e+001	5.860448e-003
6.699562e+001	5.772638e-003
6.704330e+001	5.696221e-003
6.709098e+001	5.267015e-003
6.713867e+001	5.696221e-003
6.718636e+001	5.245100e-003
6.723404e+001	5.852011e-003
6.728173e+001	5.846540e-003
6.732941e+001	5.846540e-003
6.737709e+001	5.609295e-003
6.742477e+001	5.466111e-003
6.747246e+001	5.466111e-003
6.752014e+001	5.991910e-003
6.756783e+001	6.148266e-003
6.761551e+001	5.991910e-003
6.766320e+001	5.706451e-003
6.771088e+001	5.581402e-003
6.775856e+001	5.581402e-003
6.780624e+001	5.738282e-003
6.785393e+001	5.851935e-003
6.790161e+001	5.996173e-003
6.794930e+001	5.996173e-003
6.799698e+001	5.530512e-003
6.804466e+001	5.407809e-003
6.809234e+001	5.278635e-003
6.814003e+001	5.151867e-003
6.818771e+001	5.151867e-003
6.823540e+001	6.247531e-003
6.828308e+001	6.247531e-003
6.833077e+001	6.247531e-003
6.837845e+001	5.793271e-003
6.842613e+001	5.491600e-003
6.847381e+001	5.491600e-003
6.852150e+001	5.500860e-003
6.856918e+001	5.763323e-003
6.861687e+001	5.763323e-003
6.866455e+001	5.763323e-003
6.871223e+001	5.799877e-003
6.875992e+001	6.157436e-003
6.880760e+001	6.157436e-003
6.885529e+001	6.311502e-003
6.890297e+001	6.311502e-003
6.895066e+001	6.191284e-003
6.899834e+001	5.994192e-003
6.904602e+001	5.994192e-003
6.909370e+001	5.386986e-003
6.914139e+001	5.310932e-003
6.918907e+001	5.386986e-003
6.923676e+001	5.687178e-003
6.928444e+001	5.687178e-003
6.933213e+001	5.857834e-003
6.937980e+001	5.857834e-003
6.942749e+001	5.857834e-003
6.947517e+001	5.647223e-003
6.952286e+001	5.587145e-003
6.957054e+001	5.647223e-003
6.961823e+001	5.383185e-003
6.966591e+001	5.679183e-003
6.971359e+001	5.680209e-003
6.976127e+001	5.680209e-003
6.980896e+001	5.852691e-003
6.985664e+001	6.028722e-003
6.990433e+001	6.101027e-003
6.995201e+001	6.028722e-003
6.999970e+001	5.649589e-003
7.004738e+001	5.570222e-003
7.009506e+001	5.570222e-003
7.014274e+001	5.647290e-003
7.019043e+001	6.325762e-003
7.023812e+001	5.647290e-003
7.028580e+001	5.554216e-003
7.033348e+001	5.554216e-003
7.038116e+001	5.554216e-003
7.042885e+001	6.129592e-003
7.047653e+001	5.574520e-003
7.052422e+001	5.574520e-003
7.057190e+001	5.501797e-003
7.061959e+001	5.479199e-003
7.066727e+001	5.501797e-003
7.071495e+001	5.904637e-003
7.076263e+001	5.904637e-003
7.081032e+001	5.755794e-003
7.085800e+001	5.528329e-003
7.090569e+001	5.755794e-003
7.095337e+001	6.040394e-003
7.100105e+001	6.040394e-003
7.104873e+001	6.082976e-003
7.109642e+001	5.854237e-003
7.114410e+001	5.765797e-003
7.119179e+001	5.765797e-003
7.123947e+001	5.515199e-003
7.128716e+001	5.495866e-003
7.133484e+001	5.495866e-003
7.138252e+001	5.848904e-003
7.143020e+001	5.848904e-003
7.147789e+001	5.848904e-003
7.152557e+001	5.687854e-003
7.157326e+001	5.687854e-003
7.162094e+001	5.687854e-003
7.166863e+001	5.745885e-003
7.171631e+001	6.209824e-003
7.176399e+001	6.209824e-003
7.181168e+001	6.167056e-003
7.185936e+001	5.411841e-003
7.190705e+001	6.028137e-003
7.195473e+001	6.028137e-003
7.200241e+001	6.028137e-003
7.205009e+001	5.870214e-003
7.209778e+001	5.870214e-003
7.214546e+001	5.523265e-003
7.219315e+001	6.133994e-003
7.224083e+001	5.861285e-003
7.228852e+001	5.861285e-003
7.233620e+001	5.737403e-003
7.238388e+001	5.737403e-003
7.243156e+001	6.056495e-003
7.247925e+001	6.056495e-003
7.252693e+001	5.985426e-003
7.257462e+001	5.758170e-003
7.262230e+001	5.758170e-003
7.266998e+001	5.222245e-003
7.271766e+001	5.222245e-003
7.276535e+001	5.597547e-003
7.281303e+001	5.597547e-003
7.286072e+001	5.597547e-003
7.290840e+001	5.643064e-003
7.295609e+001	5.643064e-003
7.300377e+001	5.643064e-003
7.305145e+001	5.631983e-003
7.309913e+001	5.844709e-003
7.314682e+001	5.631983e-003
7.319450e+001	5.291838e-003
7.324219e+001	5.291838e-003
7.328987e+001	5.405877e-003
7.333755e+001	5.646525e-003
7.338524e+001	5.810130e-003
7.343292e+001	5.810130e-003
7.348061e+001	5.626648e-003
7.352829e+001	5.351453e-003
7.357598e+001	5.290573e-003
7.362366e+001	5.351453e-003
7.367134e+001	5.426685e-003
7.371902e+001	5.815580e-003
7.376671e+001	5.815580e-003
7.381439e+001	5.610287e-003
7.386208e+001	5.610287e-003
7.390976e+001	6.005920e-003
7.395745e+001	6.050428e-003
7.400513e+001	6.005920e-003
7.405281e+001	5.445219e-003
7.410049e+001	5.445219e-003
7.414818e+001	5.725561e-003
7.419586e+001	5.767545e-003
7.424355e+001	5.725561e-003
7.429123e+001	4.964040e-003
7.433891e+001	4.964040e-003
7.438659e+001	5.652922e-003
7.443428e+001	5.652922e-003
7.448196e+001	5.783091e-003
7.452965e+001	6.065430e-003
7.457733e+001	6.065430e-003
7.462502e+001	5.518307e-003
7.467270e+001	5.510437e-003
7.472038e+001	5.518307e-003
7.476806e+001	5.824340e-003
7.481575e+001	5.824340e-003
7.486344e+001	5.824340e-003
7.491112e+001	5.949004e-003
7.495880e+001	5.949004e-003
7.500648e+001	5.616918e-003
7.505417e+001	5.616918e-003
7.510185e+001	5.616918e-003
7.514954e+001	5.271659e-003
7.519722e+001	5.230710e-003
7.524491e+001	5.230710e-003
7.529259e+001	5.435474e-003
7.534027e+001	5.435474e-003
7.538795e+001	5.571466e-003
7.543564e+001	5.719757e-003
7.548332e+001	5.828337e-003
7.553101e+001	5.828337e-003
7.557869e+001	5.859204e-003
7.562637e+001	5.859204e-003
7.567405e+001	5.745518e-003
7.572174e+001	5.279585e-003
7.576942e+001	5.279585e-003
7.581711e+001	5.279585e-003
7.586479e+001	5.656389e-003
7.591248e+001	5.691192e-003
7.596016e+001	5.937106e-003
7.600784e+001	5.855060e-003
7.605552e+001	5.877909e-003
7.610321e+001	5.855060e-003
7.615089e+001	5.877909e-003
7.619858e+001	5.676016e-003
7.624626e+001	5.871668e-003
7.629395e+001	5.871668e-003
7.634163e+001	5.871668e-003
7.638931e+001	5.686681e-003
7.643700e+001	5.686681e-003
7.648468e+001	5.919115e-003
7.653237e+001	5.919115e-003
7.658005e+001	5.556674e-003
7.662773e+001	5.343270e-003
7.667541e+001	5.556674e-003
7.672310e+001	5.913283e-003
7.677078e+001	5.930955e-003
7.681847e+001	5.913283e-003
7.686615e+001	5.735843e-003
7.691384e+001	5.735843e-003
7.696152e+001	5.875853e-003
7.700920e+001	5.875853e-003
7.705688e+001	5.875853e-003
7.710457e+001	5.923134e-003
7.715225e+001	6.170461e-003
7.719994e+001	5.923134e-003
7.724762e+001	5.670832e-003
7.729530e+001	5.231882e-003
7.734298e+001	5.231882e-003
7.739067e+001	5.282587e-003
7.743835e+001	5.282587e-003
7.748604e+001	5.282587e-003
7.753372e+001	5.356935e-003
7.758141e+001	5.456878e-003
7.762909e+001	5.754582e-003
7.767677e+001	5.754582e-003
7.772445e+001	5.754582e-003
7.777214e+001	5.884441e-003
7.781983e+001	6.011472e-003
7.786751e+001	6.011472e-003
7.791520e+001	5.248761e-003
7.796287e+001	5.210551e-003
7.801056e+001	4.999120e-003
7.805824e+001	4.999120e-003
7.810593e+001	5.513358e-003
7.815361e+001	5.513358e-003
7.820130e+001	5.513358e-003
7.824898e+001	5.721689e-003
7.829666e+001	6.220474e-003
7.834434e+001	5.721689e-003
7.839203e+001	5.582923e-003
7.843971e+001	5.582923e-003
7.848740e+001	5.830282e-003
7.853508e+001	5.830282e-003
7.858277e+001	6.031473e-003
7.863045e+001	5.665321e-003
7.867813e+001	5.460129e-003
7.872581e+001	5.460129e-003
7.877350e+001	5.630482e-003
7.882118e+001	5.630482e-003
7.886887e+001	5.480860e-003
7.891655e+001	5.480860e-003
7.896423e+001	5.480860e-003
7.901191e+001	5.174592e-003
7.905960e+001	5.174592e-003
7.910728e+001	6.357374e-003
7.915497e+001	6.357374e-003
7.920265e+001	5.647174e-003
7.925034e+001	5.647174e-003
7.929802e+001	5.647174e-003
7.934570e+001	5.975788e-003
7.939339e+001	5.477794e-003
7.944107e+001	5.477794e-003
7.948876e+001	5.477794e-003
7.953644e+001	5.816399e-003
7.958413e+001	5.999113e-003
7.963180e+001	5.999113e-003
7.967949e+001	6.282252e-003
7.972717e+001	6.377696e-003
7.977486e+001	6.377696e-003
7.982254e+001	5.807829e-003
7.987023e+001	5.657997e-003
7.991791e+001	5.657997e-003
7.996559e+001	5.657997e-003
8.001327e+001	5.470248e-003
8.006096e+001	5.470248e-003
8.010864e+001	5.555309e-003
8.015633e+001	5.860327e-003
8.020401e+001	5.860327e-003
8.025170e+001	5.646071e-003
8.029937e+001	5.646071e-003
8.034706e+001	6.080661e-003
8.039474e+001	6.080661e-003
8.044243e+001	5.835972e-003
8.049011e+001	5.604212e-003
8.053780e+001	5.641271e-003
8.058548e+001	5.641271e-003
8.063316e+001	5.641271e-003
8.068084e+001	5.568234e-003
8.072853e+001	5.568234e-003
8.077621e+001	6.034992e-003
8.082390e+001	6.034992e-003
8.087158e+001	6.005842e-003
8.091927e+001	6.005842e-003
8.096695e+001	5.955115e-003
8.101463e+001	5.758181e-003
8.106232e+001	5.389350e-003
8.111000e+001	5.389350e-003
8.115769e+001	5.707112e-003
8.120537e+001	5.999101e-003
8.125305e+001	5.999101e-003
8.130073e+001	5.999101e-003
8.134842e+001	5.856573e-003
8.139610e+001	5.834698e-003
8.144379e+001	5.856573e-003
8.149147e+001	6.067705e-003
8.153916e+001	6.067705e-003
8.158684e+001	5.183789e-003
8.163452e+001	5.183789e-003
8.168220e+001	6.071916e-003
8.172989e+001	6.264846e-003
8.177757e+001	6.071916e-003
8.182526e+001	5.827040e-003
8.187294e+001	5.827040e-003
8.192063e+001	5.641079e-003
8.196830e+001	5.749898e-003
8.201599e+001	5.749898e-003
8.206367e+001	5.944451e-003
8.211136e+001	5.944451e-003
8.215904e+001	5.772576e-003
8.220673e+001	5.772576e-003
8.225441e+001	5.523481e-003
8.230209e+001	5.406095e-003
8.234977e+001	5.406095e-003
8.239746e+001	5.830454e-003
8.244515e+001	6.161911e-003
8.249283e+001	6.161911e-003
8.254052e+001	6.059680e-003
8.258820e+001	5.695733e-003
8.263588e+001	5.624543e-003
8.268356e+001	5.624543e-003
8.273125e+001	5.564845e-003
8.277893e+001	5.245428e-003
8.282662e+001	5.245428e-003
8.287430e+001	5.314224e-003
8.292198e+001	5.405234e-003
8.296966e+001	5.803788e-003
8.301735e+001	5.803788e-003
8.306503e+001	5.272486e-003
8.311272e+001	5.272486e-003
8.316040e+001	5.364335e-003
8.320809e+001	5.804304e-003
8.325577e+001	5.804304e-003
8.330345e+001	6.005271e-003
8.335113e+001	6.005271e-003
8.339882e+001	5.542538e-003
8.344650e+001	5.421760e-003
8.349419e+001	5.421760e-003
8.354187e+001	5.479409e-003
8.358955e+001	5.657161e-003
8.363723e+001	5.479409e-003
8.368492e+001	5.609691e-003
8.373260e+001	5.348802e-003
8.378029e+001	5.609691e-003
8.382797e+001	6.056172e-003
8.387566e+001	6.056172e-003
8.392334e+001	5.365318e-003
8.397102e+001	5.365318e-003
8.401871e+001	5.840331e-003
8.406639e+001	5.840331e-003
8.411408e+001	5.638398e-003
8.416176e+001	5.302542e-003
8.420945e+001	5.302542e-003
8.425713e+001	5.614540e-003
8.430481e+001	5.969562e-003
8.435249e+001	6.452058e-003
8.440018e+001	6.261358e-003
8.444786e+001	6.261358e-003
8.449555e+001	6.158055e-003
8.454323e+001	5.681169e-003
8.459091e+001	5.539419e-003
8.463859e+001	5.681169e-003
8.468628e+001	5.842875e-003
8.473396e+001	5.842875e-003
8.478165e+001	5.803367e-003
8.482933e+001	5.565520e-003
8.487702e+001	5.296262e-003
8.492470e+001	5.194504e-003
8.497238e+001	5.194504e-003
8.502006e+001	6.196353e-003
8.506775e+001	6.196353e-003
8.511543e+001	5.522769e-003
8.516312e+001	5.522769e-003
8.521080e+001	5.585777e-003
8.525848e+001	5.949585e-003
8.530616e+001	5.949585e-003
8.535385e+001	5.572477e-003
8.540153e+001	5.247526e-003
8.544922e+001	4.883125e-003
8.549691e+001	4.883125e-003
8.554459e+001	6.119249e-003
8.559227e+001	6.119249e-003
8.563995e+001	5.670561e-003
8.568764e+001	5.670561e-003
8.573532e+001	5.429221e-003
8.578301e+001	5.901917e-003
8.583069e+001	5.932090e-003
8.587838e+001	5.932090e-003
8.592605e+001	5.814388e-003
8.597374e+001	5.814388e-003
8.602142e+001	5.318903e-003
8.606911e+001	5.791697e-003
8.611679e+001	5.791697e-003
8.616448e+001	5.919282e-003
8.621216e+001	6.669225e-003
8.625984e+001	5.919282e-003
8.630752e+001	5.649688e-003
8.635521e+001	5.376400e-003
8.640289e+001	5.285391e-003
8.645058e+001	5.285391e-003
8.649826e+001	5.666275e-003
8.654595e+001	5.720187e-003
8.659363e+001	5.666275e-003
8.664131e+001	5.720187e-003
8.668899e+001	5.271406e-003
8.673668e+001	5.821963e-003
8.678436e+001	5.915107e-003
8.683205e+001	5.915107e-003
8.687973e+001	5.906302e-003
8.692741e+001	5.243857e-003
8.697509e+001	5.243857e-003
8.702278e+001	5.871972e-003
8.707047e+001	5.871972e-003
8.711815e+001	5.760308e-003
8.716584e+001	5.703843e-003
8.721352e+001	5.640901e-003
8.726120e+001	5.640901e-003
8.730888e+001	5.155820e-003
8.735657e+001	5.499030e-003
8.740425e+001	5.499030e-003
8.745194e+001	5.682393e-003
8.749962e+001	5.682393e-003
8.754730e+001	5.511975e-003
8.759498e+001	5.511975e-003
8.764267e+001	5.595441e-003
8.769035e+001	5.627548e-003
8.773804e+001	5.716160e-003
8.778572e+001	5.679704e-003
8.783341e+001	5.716160e-003
8.788109e+001	5.679704e-003
8.792877e+001	5.384420e-003
8.797645e+001	5.132534e-003
8.802414e+001	5.132534e-003
8.807182e+001	5.132534e-003
8.811951e+001	5.602827e-003
8.816719e+001	5.602827e-003
8.821488e+001	5.602827e-003
8.826255e+001	5.729885e-003
8.831024e+001	6.142439e-003
8.835792e+001	6.142439e-003
8.840561e+001	5.530580e-003
8.845329e+001	5.530580e-003
8.850098e+001	5.530580e-003
8.854866e+001	5.439748e-003
8.859634e+001	5.439748e-003
8.864403e+001	5.439748e-003
8.869171e+001	5.666941e-003
8.873940e+001	5.368036e-003
8.878708e+001	5.516291e-003
8.883477e+001	5.516291e-003
8.888245e+001	6.035482e-003
8.893013e+001	6.035482e-003
8.897781e+001	5.793369e-003
8.902550e+001	5.793369e-003
8.907318e+001	5.858325e-003
8.912087e+001	5.858325e-003
8.916855e+001	5.653584e-003
8.921623e+001	5.321826e-003
8.926391e+001	5.318873e-003
8.931160e+001	5.318873e-003
8.935928e+001	6.017244e-003
8.940697e+001	6.017244e-003
8.945465e+001	5.682417e-003
8.950234e+001	5.682417e-003
8.955002e+001	5.057761e-003
8.959770e+001	5.910847e-003
8.964538e+001	5.057761e-003
8.969307e+001	5.727899e-003
8.974075e+001	5.727899e-003
8.978844e+001	5.727899e-003
8.983612e+001	5.536586e-003
8.988380e+001	5.536586e-003
8.993148e+001	5.390038e-003
8.997917e+001	5.081968e-003
9.002686e+001	5.081968e-003
9.007454e+001	5.567810e-003
9.012223e+001	5.656546e-003
9.016991e+001	5.656546e-003
9.021759e+001	5.656546e-003
9.026527e+001	5.588713e-003
9.031296e+001	5.398906e-003
9.036064e+001	5.398906e-003
9.040833e+001	5.398906e-003
9.045601e+001	5.403748e-003
9.050370e+001	5.403748e-003
9.055138e+001	5.916661e-003
9.059906e+001	5.916661e-003
9.064674e+001	6.218607e-003
9.069443e+001	5.704796e-003
9.074211e+001	5.796460e-003
9.078980e+001	5.704796e-003
9.083748e+001	5.796460e-003
9.088516e+001	5.718916e-003
9.093284e+001	5.718916e-003
9.098053e+001	5.718916e-003
9.102821e+001	6.220790e-003
9.107590e+001	6.220790e-003
9.112358e+001	5.676069e-003
9.117127e+001	5.588875e-003
9.121895e+001	5.395734e-003
9.126663e+001	5.395734e-003
9.131431e+001	5.628020e-003
9.136200e+001	5.845505e-003
9.140968e+001	5.845505e-003
9.145737e+001	5.845505e-003
9.150505e+001	5.741639e-003
9.155273e+001	5.963389e-003
9.160042e+001	5.684690e-003
9.164810e+001	5.314210e-003
9.169579e+001	5.314210e-003
9.174347e+001	5.817385e-003
9.179116e+001	5.855537e-003
9.183884e+001	5.855537e-003
9.188652e+001	5.494849e-003
9.193420e+001	5.494849e-003
9.198189e+001	5.546486e-003
9.202957e+001	5.712222e-003
9.207726e+001	5.712222e-003
9.212494e+001	5.712222e-003
9.217262e+001	5.897384e-003
9.222030e+001	6.879986e-003
9.226799e+001	6.879986e-003
9.231567e+001	5.930207e-003
9.236336e+001	5.580239e-003
9.241104e+001	5.580239e-003
9.245873e+001	5.583817e-003
9.250641e+001	5.623583e-003
9.255409e+001	5.583817e-003
9.260177e+001	5.669336e-003
9.264946e+001	5.649365e-003
9.269714e+001	5.669336e-003
9.274483e+001	5.649365e-003
9.279251e+001	5.302519e-003
9.284020e+001	5.302519e-003
9.288788e+001	5.715497e-003
9.293556e+001	5.984457e-003
9.298324e+001	5.715497e-003
9.303093e+001	5.630950e-003
9.307861e+001	5.630950e-003
9.312630e+001	5.733502e-003
9.317398e+001	5.920789e-003
9.322166e+001	5.920789e-003
9.326935e+001	5.672825e-003
9.331703e+001	5.672825e-003
9.336472e+001	5.672825e-003
9.341240e+001	5.373965e-003
9.346009e+001	5.373965e-003
9.350777e+001	5.471536e-003
9.355545e+001	5.720353e-003
9.360313e+001	5.491899e-003
9.365082e+001	5.491899e-003
9.369850e+001	5.491899e-003
9.374619e+001	5.693065e-003
9.379387e+001	5.693065e-003
9.384155e+001	5.879078e-003
9.388923e+001	5.970126e-003
9.393692e+001	5.970126e-003
9.398460e+001	5.704968e-003
9.403229e+001	5.704968e-003
9.407997e+001	5.813556e-003
9.412766e+001	5.813556e-003
9.417534e+001	5.839313e-003
9.422302e+001	5.407091e-003
9.427070e+001	5.283815e-003
9.431839e+001	5.283815e-003
9.436607e+001	5.941510e-003
9.441376e+001	5.941510e-003
9.446144e+001	5.758790e-003
9.450912e+001	5.758790e-003
9.455680e+001	5.779140e-003
9.460449e+001	6.241471e-003
9.465218e+001	6.241471e-003
9.469986e+001	6.016617e-003
9.474755e+001	5.834789e-003
9.479523e+001	5.212763e-003
9.484291e+001	5.212763e-003
9.489059e+001	5.874159e-003
9.493828e+001	5.921913e-003
9.498596e+001	5.874159e-003
9.503365e+001	5.842065e-003
9.508133e+001	5.811371e-003
9.512902e+001	5.390156e-003
9.517670e+001	5.390156e-003
9.522438e+001	5.452624e-003
9.527206e+001	5.558766e-003
9.531975e+001	5.558766e-003
9.536743e+001	5.731149e-003
9.541512e+001	5.731149e-003
9.546280e+001	5.971951e-003
9.551048e+001	5.971951e-003
9.555816e+001	5.810178e-003
9.560585e+001	5.810178e-003
9.565353e+001	5.652183e-003
9.570122e+001	5.652183e-003
9.574890e+001	5.448183e-003
9.579659e+001	5.448183e-003
9.584427e+001	5.634697e-003
9.589195e+001	5.634697e-003
9.593963e+001	5.297143e-003
9.598732e+001	5.297143e-003
9.603500e+001	5.481553e-003
9.608269e+001	5.583594e-003
9.613038e+001	5.777217e-003
9.617805e+001	6.221762e-003
9.622574e+001	5.836821e-003
9.627342e+001	6.076257e-003
9.632111e+001	5.836821e-003
9.636879e+001	5.541780e-003
9.641648e+001	5.541780e-003
9.646416e+001	6.003857e-003
9.651184e+001	6.126988e-003
9.655952e+001	6.003857e-003
9.660721e+001	6.126988e-003
9.665489e+001	5.863182e-003
9.670258e+001	5.768568e-003
9.675026e+001	5.556018e-003
9.679795e+001	5.556018e-003
9.684562e+001	5.556018e-003
9.689331e+001	5.720688e-003
9.694099e+001	5.486273e-003
9.698868e+001	5.720688e-003
9.703636e+001	5.678359e-003
9.708405e+001	5.697058e-003
9.713173e+001	5.697058e-003
9.717941e+001	5.697058e-003
9.722709e+001	6.017711e-003
9.727478e+001	5.394539e-003
9.732246e+001	5.702651e-003
9.737015e+001	5.496576e-003
9.741783e+001	5.496576e-003
9.746552e+001	5.496576e-003
9.751320e+001	5.623262e-003
9.756088e+001	5.623262e-003
9.760856e+001	5.623262e-003
9.765625e+001	5.634047e-003
9.770394e+001	5.983074e-003
9.775162e+001	5.983074e-003
9.779930e+001	5.764676e-003
9.784698e+001	5.764676e-003
9.789467e+001	6.019611e-003
9.794235e+001	6.325824e-003
9.799004e+001	6.325824e-003
9.803772e+001	5.659760e-003
9.808541e+001	5.659760e-003
9.813309e+001	5.885363e-003
9.818077e+001	5.885363e-003
9.822845e+001	5.582950e-003
9.827614e+001	5.527207e-003
9.832382e+001	5.527207e-003
9.837151e+001	5.560661e-003
9.841919e+001	5.820284e-003
9.846688e+001	5.820284e-003
9.851455e+001	5.958267e-003
9.856224e+001	5.452070e-003
9.860992e+001	5.452070e-003
9.865761e+001	5.452070e-003
9.870529e+001	5.578512e-003
9.875298e+001	5.743261e-003
9.880066e+001	5.754088e-003
9.884834e+001	5.743261e-003
9.889602e+001	5.556985e-003
9.894371e+001	5.531742e-003
9.899139e+001	5.332827e-003
9.903908e+001	5.192829e-003
9.908676e+001	5.332827e-003
9.913445e+001	6.429806e-003
9.918212e+001	6.429806e-003
9.922981e+001	5.401850e-003
9.927750e+001	5.401850e-003
9.932518e+001	5.619456e-003
9.937287e+001	5.619456e-003
9.942055e+001	5.430293e-003
9.946823e+001	5.065393e-003
9.951591e+001	5.065393e-003
9.956360e+001	5.377493e-003
9.961128e+001	5.377493e-003
9.965897e+001	5.524159e-003
9.970665e+001	5.524159e-003
9.975434e+001	5.629387e-003
9.980202e+001	5.866907e-003
9.984970e+001	5.866907e-003
9.989738e+001	5.866907e-003
9.994507e+001	5.848139e-003
9.999275e+001	5.848139e-003
1.000404e+002	5.674603e-003
1.000881e+002	5.488048e-003
1.001358e+002	5.488048e-003
1.001835e+002	5.586959e-003
1.002312e+002	5.586959e-003
[truncated: 39,841 more rows]
