# Supplementary material for: Contact-free experimental determination of the static flexural spring constant of cantilever sensors using a microfluidic force tool
Source: Beilstein J Nanotechnol. 2016 Mar 30;7:492–500. doi: 10.3762/bjnano.7.43 (PMC4901535; doi:10.3762/bjnano.7.43)
Supplement: File 1 — Raw data of thermal noise spectra, cantilever deflection under fluid flow, and sensitivity values σ1. [file Beilstein_J_Nanotechnol-07-492-s001.zip › Supporting information and raw data/RA2um-2-perpg2_pvsPD.lvm]

	0.045008	0.050882
	0.045008	0.050859
	0.045008	0.050878
	0.045008	0.050868
	0.045008	0.050820
	0.066929	0.051484
	0.066929	0.051488
	0.066929	0.051504
	0.066929	0.051520
	0.066929	0.051529
	0.066929	0.051517
	0.066929	0.051496
	0.066929	0.051523
	0.066929	0.051510
	0.066929	0.051476
	0.118730	0.053180
	0.118730	0.053151
	0.118730	0.053150
	0.118730	0.053164
	0.118730	0.053157
	0.118730	0.053140
	0.118730	0.053152
	0.118730	0.053174
	0.118730	0.053205
	0.118730	0.053209
	0.203310	0.057900
	0.203310	0.057967
	0.203310	0.057986
	0.203310	0.058026
	0.203310	0.058066
	0.203310	0.058092
	0.203310	0.058149
	0.203310	0.058149
	0.203310	0.058194
	0.203310	0.058180
	0.330670	0.070288
	0.330670	0.070331
	0.330670	0.070362
	0.330670	0.070423
	0.330670	0.070436
	0.330670	0.070460
	0.330670	0.070460
	0.330670	0.070520
	0.330670	0.070535
	0.330670	0.070535
	0.487870	0.092221
	0.487870	0.092241
	0.487870	0.092262
	0.487870	0.092294
	0.487870	0.092294
	0.487870	0.092343
	0.487870	0.092347
	0.487870	0.092326
	0.487870	0.092337
	0.487870	0.092339
	0.667692	0.125349
	0.667692	0.125388
	0.667692	0.125409
	0.667692	0.125408
	0.667692	0.125387
	0.667692	0.125420
	0.667692	0.125372
	0.667692	0.125354
	0.667692	0.125343
	0.667692	0.125332
	0.860164	0.169037
	0.860164	0.169090
	0.860164	0.169118
	0.860164	0.169115
	0.860164	0.169132
	0.860164	0.169116
	0.860164	0.169102
	0.860164	0.169123
	0.860164	0.169115
	0.860164	0.169151
	1.072229	0.227318
	1.072229	0.227272
	1.072229	0.227349
	1.072229	0.227349
	1.072229	0.227379
	1.072229	0.227377
	1.072229	0.227388
	1.072229	0.227410
	1.072229	0.227455
	1.072229	0.227358
	1.281915	0.296036
	1.281915	0.296061
	1.281915	0.296124
	1.281915	0.296120
	1.281915	0.296133
	1.281915	0.296129
	1.281915	0.296144
	1.281915	0.296165
	1.281915	0.296090
	1.281915	0.296097
	1.487027	0.374467
	1.487027	0.374614
	1.487027	0.374594
	1.487027	0.374688
	1.487027	0.374714
	1.487027	0.374733
	1.487027	0.374778
	1.487027	0.374726
	1.487027	0.374735
	1.487027	0.374768
	1.699528	0.467226
	1.699528	0.466982
	1.699528	0.467198
	1.699528	0.467157
	1.699528	0.467050
	1.699528	0.467043
	1.699528	0.466982
	1.699528	0.466884
	1.699528	0.466948
	1.699528	0.466869
	1.907411	0.571394
	1.907411	0.571283
	1.907411	0.571396
	1.907411	0.571619
	1.907411	0.571686
	1.907411	0.571697
	1.907411	0.571933
	1.907411	0.571898
	1.907411	0.571844
	1.907411	0.571821
	2.098010	0.673413
	2.098010	0.673425
	2.098010	0.673172
	2.098010	0.673280
	2.098010	0.673129
	2.098010	0.673100
	2.098010	0.673162
	2.098010	0.672925
	2.098010	0.672801
	2.098010	0.672746
	2.262225	0.770495
	2.262225	0.770928
	2.262225	0.770754
	2.262225	0.770810
	2.262225	0.770298
	2.262225	0.771015
	2.262225	0.770914
	2.262225	0.770492
	2.262225	0.770876
	2.262225	0.770363
	2.345388	0.820632
	2.345388	0.820726
	2.345388	0.820484
	2.345388	0.820093
	2.345388	0.819981
	2.345388	0.819922
	2.345388	0.819333
	2.345388	0.819197
	2.345388	0.819399
	2.345388	0.818902
	2.398063	0.852957
	2.398063	0.852952
	2.398063	0.852887
	2.398063	0.852120
	2.398063	0.852412
	2.398063	0.851874
	2.398063	0.851884
	2.398063	0.851704
	2.398063	0.851673
	2.398063	0.851541
	2.450924	0.884952
	2.450924	0.884866
	2.450924	0.885041
	2.450924	0.885077
	2.450924	0.885018
	2.450924	0.884730
	2.450924	0.884478
	2.450924	0.884269
	2.450924	0.884573
	2.450924	0.884073
	2.450924	0.884016
	2.450924	0.883829
	2.450924	0.883333
	2.450924	0.883371
	2.450924	0.883137
	2.450924	0.882782
	2.450924	0.882309
	2.450924	0.882251
	2.450924	0.881745
	2.450924	0.881834
	2.450924	0.881555
	2.450924	0.881379
	2.450924	0.881122
	2.450924	0.880701
	2.450924	0.880618
	2.450924	0.880157
	2.450924	0.879875
	2.450924	0.879767
	2.450924	0.879706
	2.450924	0.879284
	2.548451	0.944509
	2.548451	0.944426
	2.548451	0.944566
	2.548451	0.944433
	2.548451	0.944107
	2.548451	0.943864
	2.548451	0.943766
	2.548451	0.943527
	2.548451	0.943390
	2.548451	0.942814
	2.467696	0.894926
	2.467696	0.895078
	2.467696	0.895391
	2.467696	0.895257
	2.467696	0.895362
	2.467696	0.895271
	2.467696	0.895446
	2.467696	0.895369
	2.467696	0.895291
	2.467696	0.895339
	2.402967	0.850090
	2.402967	0.850240
	2.402967	0.850616
	2.402967	0.850943
	2.402967	0.850847
	2.402967	0.850694
	2.402967	0.850794
	2.402967	0.850828
	2.402967	0.850814
	2.402967	0.850748
	2.327769	0.800302
	2.327769	0.800255
	2.327769	0.800335
	2.327769	0.800129
	2.327769	0.799983
	2.327769	0.800074
	2.327769	0.800263
	2.327769	0.800054
	2.327769	0.799941
	2.327769	0.800193
	2.234009	0.741574
	2.234009	0.741596
	2.234009	0.741544
	2.234009	0.741178
	2.234009	0.741279
	2.234009	0.741510
	2.234009	0.740871
	2.234009	0.741004
	2.234009	0.740559
	2.234009	0.740003
	2.045904	0.632671
	2.045904	0.632376
	2.045904	0.632217
	2.045904	0.631938
	2.045904	0.631654
	2.045904	0.631286
	2.045904	0.631168
	2.045904	0.630916
	2.045904	0.630722
	2.045904	0.630588
	1.795614	0.501304
	1.795614	0.501080
	1.795614	0.500837
	1.795614	0.500685
	1.795614	0.500646
	1.795614	0.500361
	1.795614	0.500312
	1.795614	0.500152
	1.795614	0.499991
	1.795614	0.499878
	1.529384	0.380015
	1.529384	0.379843
	1.529384	0.379687
	1.529384	0.379575
	1.529384	0.379486
	1.529384	0.379402
	1.529384	0.379335
	1.529384	0.379294
	1.529384	0.379198
	1.529384	0.379084
	1.260592	0.278721
	1.260592	0.278679
	1.260592	0.278593
	1.260592	0.278574
	1.260592	0.278556
	1.260592	0.278473
	1.260592	0.278414
	1.260592	0.278359
	1.260592	0.278388
	1.260592	0.278327
	0.993547	0.197898
	0.993547	0.197877
	0.993547	0.197832
	0.993547	0.197838
	0.993547	0.197803
	0.993547	0.197752
	0.993547	0.197702
	0.993547	0.197651
	0.993547	0.197595
	0.993547	0.197577
	0.723211	0.132686
	0.723211	0.132667
	0.723211	0.132646
	0.723211	0.132622
	0.723211	0.132598
	0.723211	0.132572
	0.723211	0.132348
	0.723211	0.131900
	0.723211	0.131787
	0.723211	0.131479
	0.493692	0.089439
	0.493692	0.089518
	0.493692	0.089544
	0.493692	0.089550
	0.493692	0.089587
	0.493692	0.089615
	0.493692	0.089631
	0.493692	0.089685
	0.493692	0.089693
	0.493692	0.089718
	0.295497	0.065231
	0.295497	0.065233
	0.295497	0.065243
	0.295497	0.065248
	0.295497	0.065266
	0.295497	0.065237
	0.295497	0.065210
	0.295497	0.065202
	0.295497	0.065148
	0.295497	0.065101
	0.144902	0.053395
	0.144902	0.053387
	0.144902	0.053377
	0.144902	0.053343
	0.144902	0.053328
	0.144902	0.053318
	0.144902	0.053259
	0.144902	0.053242
	0.144902	0.053232
	0.144902	0.053182
	0.069348	0.050007
	0.069348	0.050050
	0.069348	0.050098
	0.069348	0.050101
	0.069348	0.050096
	0.069348	0.050083
	0.069348	0.050093
	0.069348	0.050148
	0.069348	0.050214
	0.069348	0.050254
	0.049354	0.049683
	0.049354	0.049741
	0.049354	0.049771
	0.049354	0.049817
	0.049354	0.049858
	0.049354	0.049876
	0.049354	0.049946
	0.049354	0.050006
	0.049354	0.050037
	0.049354	0.050059
	0.044160	0.049964
	0.044160	0.049954
	0.044160	0.050019
	0.044160	0.050038
	0.044160	0.050027
	0.044160	0.050018
	0.044160	0.050025
	0.044160	0.050009
	0.044160	0.050026
	0.044160	0.050012
	0.042859	0.049813
	0.042859	0.049804
	0.042859	0.049811
	0.042859	0.049806
	0.042859	0.049752
	0.042859	0.049730
	0.042859	0.049694
	0.042859	0.049609
	0.042859	0.049589
	0.042859	0.049537
	0.042859	0.049499
	0.042859	0.049454
	0.042859	0.049425
	0.042859	0.049399
	0.042859	0.048905
	0.042859	0.048916
	0.042859	0.048895
	0.042859	0.048880
	0.042859	0.048872
	0.042859	0.048835
	0.042859	0.048834
	0.042859	0.048853
	0.042859	0.048851
	0.042859	0.048830
	0.042859	0.048844
	0.042859	0.048842
	0.042859	0.048849
