# Supplementary material for: Contact-free experimental determination of the static flexural spring constant of cantilever sensors using a microfluidic force tool
Source: Beilstein J Nanotechnol. 2016 Mar 30;7:492–500. doi: 10.3762/bjnano.7.43 (PMC4901535; doi:10.3762/bjnano.7.43)
Supplement: File 1 — Raw data of thermal noise spectra, cantilever deflection under fluid flow, and sensitivity values σ1. [file Beilstein_J_Nanotechnol-07-492-s001.zip › Supporting information and raw data/RA2um_perpg2_h100_ch120_offset0_tune1_2.txt]

kHz	fm�/Hz
4.959106e+000	1.834081e+003
5.006790e+000	1.834082e+003
5.054474e+000	1.834082e+003
5.102158e+000	1.834082e+003
5.149841e+000	1.834083e+003
5.197525e+000	1.834083e+003
5.245209e+000	1.834084e+003
5.292893e+000	1.834084e+003
5.340576e+000	1.834085e+003
5.388260e+000	1.834085e+003
5.435943e+000	1.834086e+003
5.483627e+000	1.834086e+003
5.531311e+000	1.834087e+003
5.578995e+000	1.834087e+003
5.626679e+000	1.834088e+003
5.674362e+000	1.834088e+003
5.722046e+000	1.834088e+003
5.769729e+000	1.834089e+003
5.817413e+000	1.834089e+003
5.865097e+000	1.834090e+003
5.912781e+000	1.834090e+003
5.960464e+000	1.834091e+003
6.008148e+000	1.834091e+003
6.055832e+000	1.834092e+003
6.103516e+000	1.834092e+003
6.151199e+000	1.834093e+003
6.198883e+000	1.834093e+003
6.246567e+000	1.834094e+003
6.294250e+000	1.834094e+003
6.341934e+000	1.834094e+003
6.389618e+000	1.834095e+003
6.437302e+000	1.834095e+003
6.484985e+000	1.834096e+003
6.532669e+000	1.834096e+003
6.580353e+000	1.834097e+003
6.628037e+000	1.834097e+003
6.675720e+000	1.834098e+003
6.723404e+000	1.834098e+003
6.771088e+000	1.834099e+003
6.818771e+000	1.834099e+003
6.866455e+000	1.834100e+003
6.914139e+000	1.834100e+003
6.961822e+000	1.834100e+003
7.009506e+000	1.834101e+003
7.057190e+000	1.834101e+003
7.104874e+000	1.834102e+003
7.152558e+000	1.834102e+003
7.200241e+000	1.834103e+003
7.247925e+000	1.834103e+003
7.295608e+000	1.834104e+003
7.343292e+000	1.834104e+003
7.390976e+000	1.834105e+003
7.438660e+000	1.834105e+003
7.486343e+000	1.834106e+003
7.534027e+000	1.834106e+003
7.581711e+000	1.834107e+003
7.629395e+000	1.834107e+003
7.677078e+000	1.834108e+003
7.724762e+000	1.834108e+003
7.772446e+000	1.834109e+003
7.820129e+000	1.834109e+003
7.867813e+000	1.834110e+003
7.915497e+000	1.834110e+003
7.963181e+000	1.834110e+003
8.010864e+000	1.834111e+003
8.058548e+000	1.834111e+003
8.106231e+000	1.834112e+003
8.153916e+000	1.834112e+003
8.201600e+000	1.834113e+003
8.249283e+000	1.834113e+003
8.296967e+000	1.834114e+003
8.344650e+000	1.834114e+003
8.392334e+000	1.834115e+003
8.440018e+000	1.834115e+003
8.487701e+000	1.834116e+003
8.535385e+000	1.834116e+003
8.583068e+000	1.834117e+003
8.630753e+000	1.834117e+003
8.678437e+000	1.834118e+003
8.726120e+000	1.834118e+003
8.773804e+000	1.834119e+003
8.821487e+000	1.834119e+003
8.869171e+000	1.834120e+003
8.916854e+000	1.834120e+003
8.964539e+000	1.834120e+003
9.012223e+000	1.834121e+003
9.059906e+000	1.834121e+003
9.107590e+000	1.834122e+003
9.155273e+000	1.834122e+003
9.202957e+000	1.834123e+003
9.250641e+000	1.834123e+003
9.298324e+000	1.834124e+003
9.346008e+000	1.834124e+003
9.393692e+000	1.834125e+003
9.441376e+000	1.834125e+003
9.489060e+000	1.834126e+003
9.536743e+000	1.834126e+003
9.584427e+000	1.834127e+003
9.632110e+000	1.834127e+003
9.679794e+000	1.834128e+003
9.727479e+000	1.834128e+003
9.775162e+000	1.834129e+003
9.822846e+000	1.834129e+003
9.870529e+000	1.834130e+003
9.918213e+000	1.834130e+003
9.965896e+000	1.834131e+003
1.001358e+001	1.834131e+003
1.006126e+001	1.834132e+003
1.010895e+001	1.834132e+003
1.015663e+001	1.834133e+003
1.020432e+001	1.834133e+003
1.025200e+001	1.834134e+003
1.029968e+001	1.834134e+003
1.034737e+001	1.834135e+003
1.039505e+001	1.834135e+003
1.044273e+001	1.834136e+003
1.049042e+001	1.834136e+003
1.053810e+001	1.834137e+003
1.058579e+001	1.834137e+003
1.063347e+001	1.834138e+003
1.068115e+001	1.834138e+003
1.072884e+001	1.834139e+003
1.077652e+001	1.834139e+003
1.082420e+001	1.834140e+003
1.087189e+001	1.834140e+003
1.091957e+001	1.834141e+003
1.096725e+001	1.834141e+003
1.101494e+001	1.834142e+003
1.106262e+001	1.834142e+003
1.111031e+001	1.834143e+003
1.115799e+001	1.834143e+003
1.120567e+001	1.834144e+003
1.125336e+001	1.834144e+003
1.130104e+001	1.834145e+003
1.134872e+001	1.834145e+003
1.139641e+001	1.834146e+003
1.144409e+001	1.834146e+003
1.149178e+001	1.834147e+003
1.153946e+001	1.834147e+003
1.158714e+001	1.834148e+003
1.163483e+001	1.834148e+003
1.168251e+001	1.834149e+003
1.173019e+001	1.834149e+003
1.177788e+001	1.834150e+003
1.182556e+001	1.834150e+003
1.187325e+001	1.834151e+003
1.192093e+001	1.834151e+003
1.196861e+001	1.834152e+003
1.201630e+001	1.834152e+003
1.206398e+001	1.834153e+003
1.211166e+001	1.834153e+003
1.215935e+001	1.834154e+003
1.220703e+001	1.834154e+003
1.225471e+001	1.834155e+003
1.230240e+001	1.834155e+003
1.235008e+001	1.834156e+003
1.239777e+001	1.834156e+003
1.244545e+001	1.834157e+003
1.249313e+001	1.834157e+003
1.254082e+001	1.834158e+003
1.258850e+001	1.834158e+003
1.263618e+001	1.834159e+003
1.268387e+001	1.834159e+003
1.273155e+001	1.834160e+003
1.277924e+001	1.834160e+003
1.282692e+001	1.834161e+003
1.287460e+001	1.834161e+003
1.292229e+001	1.834162e+003
1.296997e+001	1.834162e+003
1.301765e+001	1.834163e+003
1.306534e+001	1.834163e+003
1.311302e+001	1.834164e+003
1.316071e+001	1.834164e+003
1.320839e+001	1.834165e+003
1.325607e+001	1.834165e+003
1.330376e+001	1.834166e+003
1.335144e+001	1.834166e+003
1.339912e+001	1.834167e+003
1.344681e+001	1.834167e+003
1.349449e+001	1.834168e+003
1.354218e+001	1.834168e+003
1.358986e+001	1.834169e+003
1.363754e+001	1.834169e+003
1.368523e+001	1.834170e+003
1.373291e+001	1.834171e+003
1.378059e+001	1.834171e+003
1.382828e+001	1.834172e+003
1.387596e+001	1.834172e+003
1.392364e+001	1.834172e+003
1.397133e+001	1.834173e+003
1.401901e+001	1.834174e+003
1.406670e+001	1.834174e+003
1.411438e+001	1.834175e+003
1.416206e+001	1.834175e+003
1.420975e+001	1.834176e+003
1.425743e+001	1.834176e+003
1.430512e+001	1.834177e+003
1.435280e+001	1.834177e+003
1.440048e+001	1.834178e+003
1.444817e+001	1.834178e+003
1.449585e+001	1.834179e+003
1.454353e+001	1.834179e+003
1.459122e+001	1.834180e+003
1.463890e+001	1.834180e+003
1.468658e+001	1.834181e+003
1.473427e+001	1.834181e+003
1.478195e+001	1.834182e+003
1.482964e+001	1.834182e+003
1.487732e+001	1.834183e+003
1.492500e+001	1.834183e+003
1.497269e+001	1.834184e+003
1.502037e+001	1.834184e+003
1.506805e+001	1.834185e+003
1.511574e+001	1.834186e+003
1.516342e+001	1.834186e+003
1.521111e+001	1.834187e+003
1.525879e+001	1.834187e+003
1.530647e+001	1.834188e+003
1.535416e+001	1.834188e+003
1.540184e+001	1.834189e+003
1.544952e+001	1.834189e+003
1.549721e+001	1.834190e+003
1.554489e+001	1.834190e+003
1.559258e+001	1.834191e+003
1.564026e+001	1.834191e+003
1.568794e+001	1.834192e+003
1.573563e+001	1.834193e+003
1.578331e+001	1.834193e+003
1.583099e+001	1.834193e+003
1.587868e+001	1.834194e+003
1.592636e+001	1.834195e+003
1.597404e+001	1.834195e+003
1.602173e+001	1.834196e+003
1.606941e+001	1.834196e+003
1.611710e+001	1.834197e+003
1.616478e+001	1.834197e+003
1.621246e+001	1.834198e+003
1.626015e+001	1.834198e+003
1.630783e+001	1.834199e+003
1.635551e+001	1.834199e+003
1.640320e+001	1.834200e+003
1.645088e+001	1.834200e+003
1.649857e+001	1.834201e+003
1.654625e+001	1.834202e+003
1.659393e+001	1.834202e+003
1.664162e+001	1.834203e+003
1.668930e+001	1.834203e+003
1.673698e+001	1.834204e+003
1.678467e+001	1.834204e+003
1.683235e+001	1.834205e+003
1.688004e+001	1.834205e+003
1.692772e+001	1.834206e+003
1.697540e+001	1.834206e+003
1.702309e+001	1.834207e+003
1.707077e+001	1.834207e+003
1.711845e+001	1.834208e+003
1.716614e+001	1.834208e+003
1.721382e+001	1.834209e+003
1.726151e+001	1.834210e+003
1.730919e+001	1.834210e+003
1.735687e+001	1.834211e+003
1.740456e+001	1.834211e+003
1.745224e+001	1.834212e+003
1.749992e+001	1.834212e+003
1.754761e+001	1.834213e+003
1.759529e+001	1.834213e+003
1.764297e+001	1.834214e+003
1.769066e+001	1.834214e+003
1.773834e+001	1.834215e+003
1.778603e+001	1.834216e+003
1.783371e+001	1.834216e+003
1.788139e+001	1.834217e+003
1.792908e+001	1.834217e+003
1.797676e+001	1.834218e+003
1.802445e+001	1.834218e+003
1.807213e+001	1.834219e+003
1.811981e+001	1.834219e+003
1.816750e+001	1.834220e+003
1.821518e+001	1.834220e+003
1.826286e+001	1.834221e+003
1.831055e+001	1.834222e+003
1.835823e+001	1.834222e+003
1.840591e+001	1.834223e+003
1.845360e+001	1.834223e+003
1.850128e+001	1.834224e+003
1.854896e+001	1.834224e+003
1.859665e+001	1.834225e+003
1.864433e+001	1.834225e+003
1.869202e+001	1.834226e+003
1.873970e+001	1.834227e+003
1.878738e+001	1.834227e+003
1.883507e+001	1.834228e+003
1.888275e+001	1.834228e+003
1.893044e+001	1.834229e+003
1.897812e+001	1.834229e+003
1.902580e+001	1.834230e+003
1.907349e+001	1.834230e+003
1.912117e+001	1.834231e+003
1.916885e+001	1.834232e+003
1.921654e+001	1.834232e+003
1.926422e+001	1.834233e+003
1.931190e+001	1.834233e+003
1.935959e+001	1.834234e+003
1.940727e+001	1.834234e+003
1.945496e+001	1.834235e+003
1.950264e+001	1.834235e+003
1.955032e+001	1.834236e+003
1.959801e+001	1.834237e+003
1.964569e+001	1.834237e+003
1.969338e+001	1.834238e+003
1.974106e+001	1.834238e+003
1.978874e+001	1.834239e+003
1.983643e+001	1.834239e+003
1.988411e+001	1.834240e+003
1.993179e+001	1.834240e+003
1.997948e+001	1.834241e+003
2.002716e+001	1.834242e+003
2.007484e+001	1.834242e+003
2.012253e+001	1.834243e+003
2.017021e+001	1.834243e+003
2.021789e+001	1.834244e+003
2.026558e+001	1.834245e+003
2.031326e+001	1.834245e+003
2.036095e+001	1.834246e+003
2.040863e+001	1.834246e+003
2.045631e+001	1.834247e+003
2.050400e+001	1.834247e+003
2.055168e+001	1.834248e+003
2.059937e+001	1.834248e+003
2.064705e+001	1.834249e+003
2.069473e+001	1.834250e+003
2.074242e+001	1.834250e+003
2.079010e+001	1.834251e+003
2.083778e+001	1.834251e+003
2.088547e+001	1.834252e+003
2.093315e+001	1.834252e+003
2.098084e+001	1.834253e+003
2.102852e+001	1.834254e+003
2.107620e+001	1.834254e+003
2.112389e+001	1.834255e+003
2.117157e+001	1.834255e+003
2.121925e+001	1.834256e+003
2.126694e+001	1.834256e+003
2.131462e+001	1.834257e+003
2.136230e+001	1.834258e+003
2.140999e+001	1.834258e+003
2.145767e+001	1.834259e+003
2.150536e+001	1.834259e+003
2.155304e+001	1.834260e+003
2.160072e+001	1.834260e+003
2.164841e+001	1.834261e+003
2.169609e+001	1.834262e+003
2.174377e+001	1.834262e+003
2.179146e+001	1.834263e+003
2.183914e+001	1.834263e+003
2.188683e+001	1.834264e+003
2.193451e+001	1.834265e+003
2.198219e+001	1.834265e+003
2.202988e+001	1.834266e+003
2.207756e+001	1.834266e+003
2.212524e+001	1.834267e+003
2.217293e+001	1.834267e+003
2.222061e+001	1.834268e+003
2.226829e+001	1.834269e+003
2.231598e+001	1.834269e+003
2.236366e+001	1.834270e+003
2.241135e+001	1.834270e+003
2.245903e+001	1.834271e+003
2.250671e+001	1.834271e+003
2.255440e+001	1.834272e+003
2.260208e+001	1.834273e+003
2.264977e+001	1.834273e+003
2.269745e+001	1.834274e+003
2.274513e+001	1.834274e+003
2.279282e+001	1.834275e+003
2.284050e+001	1.834276e+003
2.288818e+001	1.834276e+003
2.293587e+001	1.834277e+003
2.298355e+001	1.834277e+003
2.303123e+001	1.834278e+003
2.307892e+001	1.834278e+003
2.312660e+001	1.834279e+003
2.317429e+001	1.834280e+003
2.322197e+001	1.834280e+003
2.326965e+001	1.834281e+003
2.331734e+001	1.834281e+003
2.336502e+001	1.834282e+003
2.341271e+001	1.834283e+003
2.346039e+001	1.834283e+003
2.350807e+001	1.834284e+003
2.355576e+001	1.834284e+003
2.360344e+001	1.834285e+003
2.365112e+001	1.834286e+003
2.369881e+001	1.834286e+003
2.374649e+001	1.834287e+003
2.379417e+001	1.834287e+003
2.384186e+001	1.834288e+003
2.388954e+001	1.834289e+003
2.393722e+001	1.834289e+003
2.398491e+001	1.834290e+003
2.403259e+001	1.834290e+003
2.408028e+001	1.834291e+003
2.412796e+001	1.834292e+003
2.417564e+001	1.834292e+003
2.422333e+001	1.834293e+003
2.427101e+001	1.834293e+003
2.431870e+001	1.834294e+003
2.436638e+001	1.834295e+003
2.441406e+001	1.834295e+003
2.446175e+001	1.834296e+003
2.450943e+001	1.834296e+003
2.455711e+001	1.834297e+003
2.460480e+001	1.834297e+003
2.465248e+001	1.834298e+003
2.470016e+001	1.834299e+003
2.474785e+001	1.834299e+003
2.479553e+001	1.834300e+003
2.484322e+001	1.834301e+003
2.489090e+001	1.834301e+003
2.493858e+001	1.834302e+003
2.498627e+001	1.834302e+003
2.503395e+001	1.834303e+003
2.508163e+001	1.834304e+003
2.512932e+001	1.834304e+003
2.517700e+001	1.834305e+003
2.522469e+001	1.834305e+003
2.527237e+001	1.834306e+003
2.532005e+001	1.834307e+003
2.536774e+001	1.834307e+003
2.541542e+001	1.834308e+003
2.546310e+001	1.834308e+003
2.551079e+001	1.834309e+003
2.555847e+001	1.834310e+003
2.560616e+001	1.834310e+003
2.565384e+001	1.834311e+003
2.570152e+001	1.834312e+003
2.574921e+001	1.834312e+003
2.579689e+001	1.834313e+003
2.584457e+001	1.834313e+003
2.589226e+001	1.834314e+003
2.593994e+001	1.834315e+003
2.598763e+001	1.834315e+003
2.603531e+001	1.834316e+003
2.608299e+001	1.834316e+003
2.613068e+001	1.834317e+003
2.617836e+001	1.834318e+003
2.622604e+001	1.834318e+003
2.627373e+001	1.834319e+003
2.632141e+001	1.834319e+003
2.636910e+001	1.834320e+003
2.641678e+001	1.834321e+003
2.646446e+001	1.834321e+003
2.651215e+001	1.834322e+003
2.655983e+001	1.834323e+003
2.660751e+001	1.834323e+003
2.665520e+001	1.834324e+003
2.670288e+001	1.834324e+003
2.675056e+001	1.834325e+003
2.679825e+001	1.834326e+003
2.684593e+001	1.834326e+003
2.689362e+001	1.834327e+003
2.694130e+001	1.834328e+003
2.698898e+001	1.834328e+003
2.703667e+001	1.834329e+003
2.708435e+001	1.834329e+003
2.713204e+001	1.834330e+003
2.717972e+001	1.834331e+003
2.722740e+001	1.834331e+003
2.727509e+001	1.834332e+003
2.732277e+001	1.834333e+003
2.737045e+001	1.834333e+003
2.741814e+001	1.834334e+003
2.746582e+001	1.834334e+003
2.751350e+001	1.834335e+003
2.756119e+001	1.834336e+003
2.760887e+001	1.834336e+003
2.765655e+001	1.834337e+003
2.770424e+001	1.834338e+003
2.775192e+001	1.834338e+003
2.779961e+001	1.834339e+003
2.784729e+001	1.834339e+003
2.789497e+001	1.834340e+003
2.794266e+001	1.834341e+003
2.799034e+001	1.834341e+003
2.803803e+001	1.834342e+003
2.808571e+001	1.834343e+003
2.813339e+001	1.834343e+003
2.818108e+001	1.834344e+003
2.822876e+001	1.834344e+003
2.827644e+001	1.834345e+003
2.832413e+001	1.834346e+003
2.837181e+001	1.834346e+003
2.841949e+001	1.834347e+003
2.846718e+001	1.834348e+003
2.851486e+001	1.834348e+003
2.856254e+001	1.834349e+003
2.861023e+001	1.834350e+003
2.865791e+001	1.834350e+003
2.870560e+001	1.834351e+003
2.875328e+001	1.834352e+003
2.880096e+001	1.834352e+003
2.884865e+001	1.834353e+003
2.889633e+001	1.834354e+003
2.894402e+001	1.834354e+003
2.899170e+001	1.834355e+003
2.903938e+001	1.834355e+003
2.908707e+001	1.834356e+003
2.913475e+001	1.834357e+003
2.918243e+001	1.834357e+003
2.923012e+001	1.834358e+003
2.927780e+001	1.834359e+003
2.932548e+001	1.834359e+003
2.937317e+001	1.834360e+003
2.942085e+001	1.834361e+003
2.946854e+001	1.834361e+003
2.951622e+001	1.834362e+003
2.956390e+001	1.834363e+003
2.961159e+001	1.834363e+003
2.965927e+001	1.834364e+003
2.970696e+001	1.834364e+003
2.975464e+001	1.834365e+003
2.980232e+001	1.834366e+003
2.985001e+001	1.834366e+003
2.989769e+001	1.834367e+003
2.994537e+001	1.834368e+003
2.999306e+001	1.834368e+003
3.004074e+001	1.834369e+003
3.008842e+001	1.834370e+003
3.013611e+001	1.834370e+003
3.018379e+001	1.834371e+003
3.023148e+001	1.834372e+003
3.027916e+001	1.834372e+003
3.032684e+001	1.834373e+003
3.037453e+001	1.834374e+003
3.042221e+001	1.834374e+003
3.046989e+001	1.834375e+003
3.051758e+001	1.834375e+003
3.056526e+001	1.834376e+003
3.061295e+001	1.834377e+003
3.066063e+001	1.834378e+003
3.070831e+001	1.834378e+003
3.075600e+001	1.834379e+003
3.080368e+001	1.834380e+003
3.085136e+001	1.834380e+003
3.089905e+001	1.834381e+003
3.094673e+001	1.834381e+003
3.099442e+001	1.834382e+003
3.104210e+001	1.834383e+003
3.108978e+001	1.834383e+003
3.113747e+001	1.834384e+003
3.118515e+001	1.834385e+003
3.123283e+001	1.834385e+003
3.128052e+001	1.834386e+003
3.132820e+001	1.834387e+003
3.137588e+001	1.834387e+003
3.142357e+001	1.834388e+003
3.147125e+001	1.834389e+003
3.151894e+001	1.834390e+003
3.156662e+001	1.834390e+003
3.161430e+001	1.834391e+003
3.166199e+001	1.834391e+003
3.170967e+001	1.834392e+003
3.175736e+001	1.834393e+003
3.180504e+001	1.834393e+003
3.185272e+001	1.834394e+003
3.190041e+001	1.834395e+003
3.194809e+001	1.834396e+003
3.199577e+001	1.834396e+003
3.204346e+001	1.834397e+003
3.209114e+001	1.834397e+003
3.213882e+001	1.834398e+003
3.218651e+001	1.834399e+003
3.223419e+001	1.834400e+003
3.228187e+001	1.834400e+003
3.232956e+001	1.834401e+003
3.237724e+001	1.834401e+003
3.242493e+001	1.834402e+003
3.247261e+001	1.834403e+003
3.252029e+001	1.834404e+003
3.256798e+001	1.834404e+003
3.261566e+001	1.834405e+003
3.266335e+001	1.834406e+003
3.271103e+001	1.834406e+003
3.275871e+001	1.834407e+003
3.280640e+001	1.834408e+003
3.285408e+001	1.834408e+003
3.290177e+001	1.834409e+003
3.294945e+001	1.834410e+003
3.299713e+001	1.834410e+003
3.304482e+001	1.834411e+003
3.309250e+001	1.834412e+003
3.314018e+001	1.834412e+003
3.318787e+001	1.834413e+003
3.323555e+001	1.834414e+003
3.328323e+001	1.834414e+003
3.333092e+001	1.834415e+003
3.337860e+001	1.834416e+003
3.342629e+001	1.834416e+003
3.347397e+001	1.834417e+003
3.352165e+001	1.834418e+003
3.356934e+001	1.834419e+003
3.361702e+001	1.834419e+003
3.366470e+001	1.834420e+003
3.371239e+001	1.834421e+003
3.376007e+001	1.834421e+003
3.380775e+001	1.834422e+003
3.385544e+001	1.834423e+003
3.390312e+001	1.834423e+003
3.395080e+001	1.834424e+003
3.399849e+001	1.834425e+003
3.404617e+001	1.834426e+003
3.409386e+001	1.834426e+003
3.414154e+001	1.834427e+003
3.418922e+001	1.834428e+003
3.423691e+001	1.834428e+003
3.428459e+001	1.834429e+003
3.433227e+001	1.834430e+003
3.437996e+001	1.834430e+003
3.442764e+001	1.834431e+003
3.447533e+001	1.834432e+003
3.452301e+001	1.834432e+003
3.457070e+001	1.834433e+003
3.461838e+001	1.834434e+003
3.466606e+001	1.834435e+003
3.471375e+001	1.834435e+003
3.476143e+001	1.834436e+003
3.480911e+001	1.834437e+003
3.485680e+001	1.834437e+003
3.490448e+001	1.834438e+003
3.495216e+001	1.834439e+003
3.499985e+001	1.834439e+003
3.504753e+001	1.834440e+003
3.509521e+001	1.834441e+003
3.514290e+001	1.834442e+003
3.519058e+001	1.834442e+003
3.523827e+001	1.834443e+003
3.528595e+001	1.834444e+003
3.533363e+001	1.834444e+003
3.538132e+001	1.834445e+003
3.542900e+001	1.834446e+003
3.547668e+001	1.834447e+003
3.552437e+001	1.834447e+003
3.557205e+001	1.834448e+003
3.561973e+001	1.834449e+003
3.566742e+001	1.834449e+003
3.571510e+001	1.834450e+003
3.576279e+001	1.834451e+003
3.581047e+001	1.834452e+003
3.585816e+001	1.834452e+003
3.590584e+001	1.834453e+003
3.595352e+001	1.834454e+003
3.600121e+001	1.834454e+003
3.604889e+001	1.834455e+003
3.609657e+001	1.834456e+003
3.614426e+001	1.834457e+003
3.619194e+001	1.834457e+003
3.623963e+001	1.834458e+003
3.628731e+001	1.834459e+003
3.633499e+001	1.834459e+003
3.638268e+001	1.834460e+003
3.643036e+001	1.834461e+003
3.647804e+001	1.834462e+003
3.652573e+001	1.834462e+003
3.657341e+001	1.834463e+003
3.662109e+001	1.834464e+003
3.666878e+001	1.834464e+003
3.671646e+001	1.834465e+003
3.676414e+001	1.834466e+003
3.681183e+001	1.834467e+003
3.685951e+001	1.834467e+003
3.690720e+001	1.834468e+003
3.695488e+001	1.834469e+003
3.700256e+001	1.834469e+003
3.705025e+001	1.834470e+003
3.709793e+001	1.834471e+003
3.714561e+001	1.834472e+003
3.719330e+001	1.834472e+003
3.724098e+001	1.834473e+003
3.728866e+001	1.834474e+003
3.733635e+001	1.834474e+003
3.738403e+001	1.834475e+003
3.743172e+001	1.834476e+003
3.747940e+001	1.834477e+003
3.752709e+001	1.834478e+003
3.757477e+001	1.834478e+003
3.762245e+001	1.834479e+003
3.767014e+001	1.834480e+003
3.771782e+001	1.834480e+003
3.776550e+001	1.834481e+003
3.781319e+001	1.834482e+003
3.786087e+001	1.834483e+003
3.790855e+001	1.834483e+003
3.795624e+001	1.834484e+003
3.800392e+001	1.834485e+003
3.805161e+001	1.834486e+003
3.809929e+001	1.834486e+003
3.814697e+001	1.834487e+003
3.819466e+001	1.834488e+003
3.824234e+001	1.834489e+003
3.829002e+001	1.834489e+003
3.833771e+001	1.834490e+003
3.838539e+001	1.834491e+003
3.843307e+001	1.834491e+003
3.848076e+001	1.834492e+003
3.852844e+001	1.834493e+003
3.857612e+001	1.834494e+003
3.862381e+001	1.834494e+003
3.867149e+001	1.834495e+003
3.871918e+001	1.834496e+003
3.876686e+001	1.834497e+003
3.881454e+001	1.834497e+003
3.886223e+001	1.834498e+003
3.890991e+001	1.834499e+003
3.895760e+001	1.834500e+003
3.900528e+001	1.834500e+003
3.905296e+001	1.834501e+003
3.910065e+001	1.834502e+003
3.914833e+001	1.834503e+003
3.919602e+001	1.834503e+003
3.924370e+001	1.834504e+003
3.929138e+001	1.834505e+003
3.933907e+001	1.834506e+003
3.938675e+001	1.834506e+003
3.943443e+001	1.834507e+003
3.948212e+001	1.834508e+003
3.952980e+001	1.834509e+003
3.957748e+001	1.834510e+003
3.962517e+001	1.834510e+003
3.967285e+001	1.834511e+003
3.972054e+001	1.834512e+003
3.976822e+001	1.834512e+003
3.981590e+001	1.834513e+003
3.986359e+001	1.834514e+003
3.991127e+001	1.834515e+003
3.995895e+001	1.834515e+003
4.000664e+001	1.834516e+003
4.005432e+001	1.834517e+003
4.010200e+001	1.834518e+003
4.014969e+001	1.834519e+003
4.019737e+001	1.834519e+003
4.024505e+001	1.834520e+003
4.029274e+001	1.834521e+003
4.034042e+001	1.834522e+003
4.038811e+001	1.834522e+003
4.043579e+001	1.834523e+003
4.048348e+001	1.834524e+003
4.053116e+001	1.834525e+003
4.057884e+001	1.834526e+003
4.062653e+001	1.834526e+003
4.067421e+001	1.834527e+003
4.072189e+001	1.834528e+003
4.076958e+001	1.834529e+003
4.081726e+001	1.834529e+003
4.086495e+001	1.834530e+003
4.091263e+001	1.834531e+003
4.096031e+001	1.834532e+003
4.100800e+001	1.834532e+003
4.105568e+001	1.834533e+003
4.110336e+001	1.834534e+003
4.115105e+001	1.834535e+003
4.119873e+001	1.834536e+003
4.124641e+001	1.834536e+003
4.129410e+001	1.834537e+003
4.134178e+001	1.834538e+003
4.138946e+001	1.834539e+003
4.143715e+001	1.834539e+003
4.148483e+001	1.834540e+003
4.153252e+001	1.834541e+003
4.158020e+001	1.834542e+003
4.162788e+001	1.834542e+003
4.167557e+001	1.834543e+003
4.172325e+001	1.834544e+003
4.177093e+001	1.834545e+003
4.181862e+001	1.834546e+003
4.186630e+001	1.834546e+003
4.191398e+001	1.834547e+003
4.196167e+001	1.834548e+003
4.200936e+001	1.834549e+003
4.205704e+001	1.834550e+003
4.210472e+001	1.834550e+003
4.215241e+001	1.834551e+003
4.220009e+001	1.834552e+003
4.224777e+001	1.834553e+003
4.229546e+001	1.834553e+003
4.234314e+001	1.834554e+003
4.239082e+001	1.834555e+003
4.243851e+001	1.834556e+003
4.248619e+001	1.834557e+003
4.253388e+001	1.834557e+003
4.258156e+001	1.834558e+003
4.262924e+001	1.834559e+003
4.267693e+001	1.834560e+003
4.272461e+001	1.834561e+003
4.277229e+001	1.834561e+003
4.281998e+001	1.834562e+003
4.286766e+001	1.834563e+003
4.291534e+001	1.834564e+003
4.296303e+001	1.834565e+003
4.301071e+001	1.834565e+003
4.305839e+001	1.834566e+003
4.310608e+001	1.834567e+003
4.315376e+001	1.834568e+003
4.320145e+001	1.834568e+003
4.324913e+001	1.834569e+003
4.329681e+001	1.834570e+003
4.334450e+001	1.834571e+003
4.339218e+001	1.834572e+003
4.343986e+001	1.834572e+003
4.348755e+001	1.834573e+003
4.353523e+001	1.834574e+003
4.358292e+001	1.834575e+003
4.363060e+001	1.834576e+003
4.367829e+001	1.834577e+003
4.372597e+001	1.834577e+003
4.377365e+001	1.834578e+003
4.382134e+001	1.834579e+003
4.386902e+001	1.834580e+003
4.391670e+001	1.834581e+003
4.396439e+001	1.834581e+003
4.401207e+001	1.834582e+003
4.405975e+001	1.834583e+003
4.410744e+001	1.834584e+003
4.415512e+001	1.834585e+003
4.420280e+001	1.834585e+003
4.425049e+001	1.834586e+003
4.429817e+001	1.834587e+003
4.434586e+001	1.834588e+003
4.439354e+001	1.834589e+003
4.444122e+001	1.834589e+003
4.448891e+001	1.834590e+003
4.453659e+001	1.834591e+003
4.458427e+001	1.834592e+003
4.463196e+001	1.834593e+003
4.467964e+001	1.834594e+003
4.472732e+001	1.834594e+003
4.477501e+001	1.834595e+003
4.482269e+001	1.834596e+003
4.487038e+001	1.834597e+003
4.491806e+001	1.834598e+003
4.496574e+001	1.834598e+003
4.501343e+001	1.834599e+003
4.506111e+001	1.834600e+003
4.510880e+001	1.834601e+003
4.515648e+001	1.834602e+003
4.520416e+001	1.834603e+003
4.525185e+001	1.834604e+003
4.529953e+001	1.834604e+003
4.534721e+001	1.834605e+003
4.539490e+001	1.834606e+003
4.544258e+001	1.834607e+003
4.549027e+001	1.834608e+003
4.553795e+001	1.834609e+003
4.558563e+001	1.834609e+003
4.563332e+001	1.834610e+003
4.568100e+001	1.834611e+003
4.572868e+001	1.834612e+003
4.577637e+001	1.834613e+003
4.582405e+001	1.834614e+003
4.587173e+001	1.834614e+003
4.591942e+001	1.834615e+003
4.596710e+001	1.834616e+003
4.601479e+001	1.834617e+003
4.606247e+001	1.834618e+003
4.611015e+001	1.834619e+003
4.615784e+001	1.834619e+003
4.620552e+001	1.834620e+003
4.625320e+001	1.834621e+003
4.630089e+001	1.834622e+003
4.634857e+001	1.834623e+003
4.639625e+001	1.834624e+003
4.644394e+001	1.834624e+003
4.649162e+001	1.834625e+003
4.653930e+001	1.834626e+003
4.658699e+001	1.834627e+003
4.663468e+001	1.834628e+003
4.668236e+001	1.834629e+003
4.673004e+001	1.834630e+003
4.677773e+001	1.834630e+003
4.682541e+001	1.834631e+003
4.687309e+001	1.834632e+003
4.692078e+001	1.834633e+003
4.696846e+001	1.834634e+003
4.701614e+001	1.834635e+003
4.706383e+001	1.834635e+003
4.711151e+001	1.834636e+003
4.715920e+001	1.834637e+003
4.720688e+001	1.834638e+003
4.725456e+001	1.834639e+003
4.730225e+001	1.834640e+003
4.734993e+001	1.834640e+003
4.739761e+001	1.834641e+003
4.744530e+001	1.834642e+003
4.749298e+001	1.834643e+003
4.754066e+001	1.834644e+003
4.758835e+001	1.834645e+003
4.763603e+001	1.834646e+003
4.768371e+001	1.834646e+003
4.773140e+001	1.834647e+003
4.777908e+001	1.834648e+003
4.782677e+001	1.834649e+003
4.787445e+001	1.834650e+003
4.792213e+001	1.834651e+003
4.796982e+001	1.834652e+003
4.801750e+001	1.834653e+003
4.806519e+001	1.834653e+003
4.811287e+001	1.834654e+003
4.816055e+001	1.834655e+003
4.820824e+001	1.834656e+003
4.825592e+001	1.834657e+003
4.830361e+001	1.834658e+003
4.835129e+001	1.834659e+003
4.839897e+001	1.834660e+003
4.844666e+001	1.834660e+003
4.849434e+001	1.834661e+003
4.854202e+001	1.834662e+003
4.858971e+001	1.834663e+003
4.863739e+001	1.834664e+003
4.868507e+001	1.834665e+003
4.873276e+001	1.834666e+003
4.878044e+001	1.834666e+003
4.882813e+001	1.834667e+003
4.887581e+001	1.834668e+003
4.892349e+001	1.834669e+003
4.897118e+001	1.834670e+003
4.901886e+001	1.834671e+003
4.906654e+001	1.834672e+003
4.911423e+001	1.834673e+003
4.916191e+001	1.834674e+003
4.920959e+001	1.834674e+003
4.925728e+001	1.834675e+003
4.930496e+001	1.834676e+003
4.935264e+001	1.834677e+003
4.940033e+001	1.834678e+003
4.944801e+001	1.834679e+003
4.949570e+001	1.834680e+003
4.954338e+001	1.834681e+003
4.959106e+001	1.834682e+003
4.963875e+001	1.834682e+003
4.968643e+001	1.834683e+003
4.973412e+001	1.834684e+003
4.978180e+001	1.834685e+003
4.982948e+001	1.834686e+003
4.987717e+001	1.834687e+003
4.992485e+001	1.834688e+003
4.997254e+001	1.834689e+003
5.002022e+001	1.834690e+003
5.006790e+001	1.834690e+003
5.011559e+001	1.834691e+003
5.016327e+001	1.834692e+003
5.021095e+001	1.834693e+003
5.025864e+001	1.834694e+003
5.030632e+001	1.834695e+003
5.035400e+001	1.834696e+003
5.040169e+001	1.834697e+003
5.044937e+001	1.834698e+003
5.049705e+001	1.834698e+003
5.054474e+001	1.834699e+003
5.059242e+001	1.834700e+003
5.064011e+001	1.834701e+003
5.068779e+001	1.834702e+003
5.073547e+001	1.834703e+003
5.078316e+001	1.834704e+003
5.083084e+001	1.834705e+003
5.087852e+001	1.834706e+003
5.092621e+001	1.834707e+003
5.097389e+001	1.834708e+003
5.102157e+001	1.834708e+003
5.106926e+001	1.834709e+003
5.111695e+001	1.834710e+003
5.116463e+001	1.834711e+003
5.121231e+001	1.834712e+003
5.126000e+001	1.834713e+003
5.130768e+001	1.834714e+003
5.135536e+001	1.834715e+003
5.140305e+001	1.834716e+003
5.145073e+001	1.834717e+003
5.149841e+001	1.834718e+003
5.154610e+001	1.834718e+003
5.159378e+001	1.834719e+003
5.164146e+001	1.834720e+003
5.168915e+001	1.834721e+003
5.173683e+001	1.834722e+003
5.178452e+001	1.834723e+003
5.183220e+001	1.834724e+003
5.187988e+001	1.834725e+003
5.192757e+001	1.834726e+003
5.197525e+001	1.834727e+003
5.202293e+001	1.834728e+003
5.207062e+001	1.834729e+003
5.211830e+001	1.834730e+003
5.216598e+001	1.834730e+003
5.221367e+001	1.834731e+003
5.226135e+001	1.834732e+003
5.230904e+001	1.834733e+003
5.235672e+001	1.834734e+003
5.240440e+001	1.834735e+003
5.245209e+001	1.834736e+003
5.249977e+001	1.834737e+003
5.254745e+001	1.834738e+003
5.259514e+001	1.834739e+003
5.264282e+001	1.834740e+003
5.269051e+001	1.834741e+003
5.273819e+001	1.834742e+003
5.278588e+001	1.834743e+003
5.283356e+001	1.834744e+003
5.288124e+001	1.834744e+003
5.292893e+001	1.834745e+003
5.297661e+001	1.834746e+003
5.302429e+001	1.834747e+003
5.307198e+001	1.834748e+003
5.311966e+001	1.834749e+003
5.316734e+001	1.834750e+003
5.321503e+001	1.834751e+003
5.326271e+001	1.834752e+003
5.331039e+001	1.834753e+003
5.335808e+001	1.834754e+003
5.340576e+001	1.834755e+003
5.345345e+001	1.834756e+003
5.350113e+001	1.834757e+003
5.354881e+001	1.834758e+003
5.359650e+001	1.834759e+003
5.364418e+001	1.834760e+003
5.369186e+001	1.834760e+003
5.373955e+001	1.834761e+003
5.378723e+001	1.834762e+003
5.383491e+001	1.834763e+003
5.388260e+001	1.834764e+003
5.393028e+001	1.834765e+003
5.397796e+001	1.834766e+003
5.402565e+001	1.834767e+003
5.407333e+001	1.834768e+003
5.412102e+001	1.834769e+003
5.416870e+001	1.834770e+003
5.421639e+001	1.834771e+003
5.426407e+001	1.834772e+003
5.431175e+001	1.834773e+003
5.435944e+001	1.834774e+003
5.440712e+001	1.834775e+003
5.445480e+001	1.834776e+003
5.450249e+001	1.834777e+003
5.455017e+001	1.834778e+003
5.459786e+001	1.834779e+003
5.464554e+001	1.834780e+003
5.469322e+001	1.834781e+003
5.474091e+001	1.834782e+003
5.478859e+001	1.834783e+003
5.483627e+001	1.834784e+003
5.488396e+001	1.834785e+003
5.493164e+001	1.834786e+003
5.497932e+001	1.834786e+003
5.502701e+001	1.834787e+003
5.507469e+001	1.834788e+003
5.512237e+001	1.834789e+003
5.517006e+001	1.834791e+003
5.521774e+001	1.834791e+003
5.526543e+001	1.834792e+003
5.531311e+001	1.834793e+003
5.536079e+001	1.834794e+003
5.540848e+001	1.834795e+003
5.545616e+001	1.834796e+003
5.550384e+001	1.834797e+003
5.555153e+001	1.834798e+003
5.559921e+001	1.834799e+003
5.564689e+001	1.834800e+003
5.569458e+001	1.834801e+003
5.574227e+001	1.834802e+003
5.578995e+001	1.834803e+003
5.583763e+001	1.834804e+003
5.588532e+001	1.834805e+003
5.593300e+001	1.834806e+003
5.598068e+001	1.834807e+003
5.602837e+001	1.834808e+003
5.607605e+001	1.834809e+003
5.612373e+001	1.834810e+003
5.617142e+001	1.834811e+003
5.621910e+001	1.834812e+003
5.626679e+001	1.834813e+003
5.631447e+001	1.834814e+003
5.636215e+001	1.834815e+003
5.640984e+001	1.834816e+003
5.645752e+001	1.834817e+003
5.650520e+001	1.834818e+003
5.655289e+001	1.834819e+003
5.660057e+001	1.834820e+003
5.664825e+001	1.834821e+003
5.669594e+001	1.834822e+003
5.674362e+001	1.834823e+003
5.679130e+001	1.834824e+003
5.683899e+001	1.834825e+003
5.688667e+001	1.834826e+003
5.693436e+001	1.834827e+003
5.698204e+001	1.834828e+003
5.702972e+001	1.834829e+003
5.707741e+001	1.834830e+003
5.712509e+001	1.834831e+003
5.717277e+001	1.834832e+003
5.722046e+001	1.834833e+003
5.726814e+001	1.834834e+003
5.731583e+001	1.834835e+003
5.736351e+001	1.834836e+003
5.741120e+001	1.834837e+003
5.745888e+001	1.834838e+003
5.750656e+001	1.834839e+003
5.755425e+001	1.834840e+003
5.760193e+001	1.834841e+003
5.764961e+001	1.834842e+003
5.769730e+001	1.834843e+003
5.774498e+001	1.834844e+003
5.779266e+001	1.834845e+003
5.784035e+001	1.834846e+003
5.788803e+001	1.834847e+003
5.793571e+001	1.834848e+003
5.798340e+001	1.834849e+003
5.803108e+001	1.834850e+003
5.807877e+001	1.834851e+003
5.812645e+001	1.834853e+003
5.817413e+001	1.834853e+003
5.822182e+001	1.834854e+003
5.826950e+001	1.834856e+003
5.831718e+001	1.834857e+003
5.836487e+001	1.834858e+003
5.841255e+001	1.834859e+003
5.846023e+001	1.834860e+003
5.850792e+001	1.834861e+003
5.855560e+001	1.834862e+003
5.860329e+001	1.834863e+003
5.865097e+001	1.834864e+003
5.869865e+001	1.834865e+003
5.874634e+001	1.834866e+003
5.879402e+001	1.834867e+003
5.884171e+001	1.834868e+003
5.888939e+001	1.834869e+003
5.893707e+001	1.834870e+003
5.898476e+001	1.834871e+003
5.903244e+001	1.834872e+003
5.908013e+001	1.834873e+003
5.912781e+001	1.834874e+003
5.917549e+001	1.834875e+003
5.922318e+001	1.834876e+003
5.927086e+001	1.834877e+003
5.931854e+001	1.834879e+003
5.936623e+001	1.834879e+003
5.941391e+001	1.834880e+003
5.946159e+001	1.834882e+003
5.950928e+001	1.834883e+003
5.955696e+001	1.834884e+003
5.960464e+001	1.834885e+003
5.965233e+001	1.834886e+003
5.970001e+001	1.834887e+003
5.974770e+001	1.834888e+003
5.979538e+001	1.834889e+003
5.984306e+001	1.834890e+003
5.989075e+001	1.834891e+003
5.993843e+001	1.834892e+003
5.998611e+001	1.834893e+003
6.003380e+001	1.834894e+003
6.008148e+001	1.834895e+003
6.012916e+001	1.834896e+003
6.017685e+001	1.834897e+003
6.022453e+001	1.834899e+003
6.027222e+001	1.834900e+003
6.031990e+001	1.834901e+003
6.036759e+001	1.834902e+003
6.041527e+001	1.834903e+003
6.046295e+001	1.834904e+003
6.051064e+001	1.834905e+003
6.055832e+001	1.834906e+003
6.060600e+001	1.834907e+003
6.065369e+001	1.834908e+003
6.070137e+001	1.834909e+003
6.074905e+001	1.834910e+003
6.079674e+001	1.834911e+003
6.084442e+001	1.834912e+003
6.089211e+001	1.834914e+003
6.093979e+001	1.834915e+003
6.098747e+001	1.834916e+003
6.103516e+001	1.834917e+003
6.108284e+001	1.834918e+003
6.113052e+001	1.834919e+003
6.117821e+001	1.834920e+003
6.122589e+001	1.834921e+003
6.127357e+001	1.834922e+003
6.132126e+001	1.834923e+003
6.136894e+001	1.834924e+003
6.141663e+001	1.834926e+003
6.146431e+001	1.834926e+003
6.151199e+001	1.834928e+003
6.155968e+001	1.834929e+003
6.160736e+001	1.834930e+003
6.165504e+001	1.834931e+003
6.170273e+001	1.834932e+003
6.175041e+001	1.834933e+003
6.179809e+001	1.834934e+003
6.184578e+001	1.834935e+003
6.189346e+001	1.834936e+003
6.194115e+001	1.834937e+003
6.198883e+001	1.834939e+003
6.203652e+001	1.834940e+003
6.208420e+001	1.834941e+003
6.213188e+001	1.834942e+003
6.217957e+001	1.834943e+003
6.222725e+001	1.834944e+003
6.227493e+001	1.834945e+003
6.232262e+001	1.834946e+003
6.237030e+001	1.834947e+003
6.241798e+001	1.834948e+003
6.246567e+001	1.834950e+003
6.251335e+001	1.834951e+003
6.256104e+001	1.834952e+003
6.260872e+001	1.834953e+003
6.265640e+001	1.834954e+003
6.270409e+001	1.834955e+003
6.275177e+001	1.834956e+003
6.279945e+001	1.834957e+003
6.284714e+001	1.834958e+003
6.289482e+001	1.834960e+003
6.294250e+001	1.834961e+003
6.299019e+001	1.834962e+003
6.303787e+001	1.834963e+003
6.308555e+001	1.834964e+003
6.313324e+001	1.834965e+003
6.318092e+001	1.834966e+003
6.322861e+001	1.834968e+003
6.327629e+001	1.834969e+003
6.332398e+001	1.834970e+003
6.337166e+001	1.834971e+003
6.341934e+001	1.834972e+003
6.346703e+001	1.834973e+003
6.351471e+001	1.834974e+003
6.356239e+001	1.834975e+003
6.361008e+001	1.834977e+003
6.365776e+001	1.834978e+003
6.370545e+001	1.834979e+003
6.375313e+001	1.834980e+003
6.380081e+001	1.834981e+003
6.384850e+001	1.834982e+003
6.389618e+001	1.834983e+003
6.394386e+001	1.834984e+003
6.399155e+001	1.834986e+003
6.403923e+001	1.834987e+003
6.408691e+001	1.834988e+003
6.413460e+001	1.834989e+003
6.418228e+001	1.834990e+003
6.422996e+001	1.834991e+003
6.427765e+001	1.834992e+003
6.432533e+001	1.834994e+003
6.437302e+001	1.834995e+003
6.442070e+001	1.834996e+003
6.446838e+001	1.834997e+003
6.451607e+001	1.834998e+003
6.456375e+001	1.834999e+003
6.461143e+001	1.835000e+003
6.465912e+001	1.835002e+003
6.470680e+001	1.835003e+003
6.475448e+001	1.835004e+003
6.480217e+001	1.835005e+003
6.484985e+001	1.835006e+003
6.489754e+001	1.835007e+003
6.494522e+001	1.835009e+003
6.499291e+001	1.835010e+003
6.504059e+001	1.835011e+003
6.508827e+001	1.835012e+003
6.513596e+001	1.835013e+003
6.518364e+001	1.835014e+003
6.523132e+001	1.835015e+003
6.527901e+001	1.835017e+003
6.532669e+001	1.835018e+003
6.537438e+001	1.835019e+003
6.542206e+001	1.835020e+003
6.546974e+001	1.835021e+003
6.551743e+001	1.835023e+003
6.556511e+001	1.835024e+003
6.561280e+001	1.835025e+003
6.566048e+001	1.835026e+003
6.570816e+001	1.835027e+003
6.575584e+001	1.835028e+003
6.580353e+001	1.835030e+003
6.585121e+001	1.835031e+003
6.589890e+001	1.835032e+003
6.594658e+001	1.835033e+003
6.599427e+001	1.835034e+003
6.604195e+001	1.835035e+003
6.608963e+001	1.835037e+003
6.613731e+001	1.835038e+003
6.618500e+001	1.835039e+003
6.623268e+001	1.835040e+003
6.628037e+001	1.835041e+003
6.632805e+001	1.835043e+003
6.637573e+001	1.835044e+003
6.642341e+001	1.835045e+003
6.647110e+001	1.835046e+003
6.651878e+001	1.835047e+003
6.656647e+001	1.835049e+003
6.661415e+001	1.835050e+003
6.666184e+001	1.835051e+003
6.670952e+001	1.835052e+003
6.675720e+001	1.835053e+003
6.680488e+001	1.835055e+003
6.685257e+001	1.835056e+003
6.690025e+001	1.835057e+003
6.694794e+001	1.835058e+003
6.699562e+001	1.835059e+003
6.704330e+001	1.835061e+003
6.709098e+001	1.835062e+003
6.713867e+001	1.835063e+003
6.718636e+001	1.835064e+003
6.723404e+001	1.835065e+003
6.728173e+001	1.835067e+003
6.732941e+001	1.835068e+003
6.737709e+001	1.835069e+003
6.742477e+001	1.835070e+003
6.747246e+001	1.835072e+003
6.752014e+001	1.835073e+003
6.756783e+001	1.835074e+003
6.761551e+001	1.835075e+003
6.766320e+001	1.835076e+003
6.771088e+001	1.835077e+003
6.775856e+001	1.835079e+003
6.780624e+001	1.835080e+003
6.785393e+001	1.835081e+003
6.790161e+001	1.835082e+003
6.794930e+001	1.835084e+003
6.799698e+001	1.835085e+003
6.804466e+001	1.835086e+003
6.809234e+001	1.835087e+003
6.814003e+001	1.835089e+003
6.818771e+001	1.835090e+003
6.823540e+001	1.835091e+003
6.828308e+001	1.835092e+003
6.833077e+001	1.835093e+003
6.837845e+001	1.835095e+003
6.842613e+001	1.835096e+003
6.847381e+001	1.835097e+003
6.852150e+001	1.835098e+003
6.856918e+001	1.835100e+003
6.861687e+001	1.835101e+003
6.866455e+001	1.835102e+003
6.871223e+001	1.835103e+003
6.875992e+001	1.835105e+003
6.880760e+001	1.835106e+003
6.885529e+001	1.835107e+003
6.890297e+001	1.835108e+003
6.895066e+001	1.835110e+003
6.899834e+001	1.835111e+003
6.904602e+001	1.835112e+003
6.909370e+001	1.835113e+003
6.914139e+001	1.835115e+003
6.918907e+001	1.835116e+003
6.923676e+001	1.835117e+003
6.928444e+001	1.835118e+003
6.933213e+001	1.835120e+003
6.937980e+001	1.835121e+003
6.942749e+001	1.835122e+003
6.947517e+001	1.835124e+003
6.952286e+001	1.835125e+003
6.957054e+001	1.835126e+003
6.961823e+001	1.835127e+003
6.966591e+001	1.835129e+003
6.971359e+001	1.835130e+003
6.976127e+001	1.835131e+003
6.980896e+001	1.835132e+003
6.985664e+001	1.835134e+003
6.990433e+001	1.835135e+003
6.995201e+001	1.835136e+003
6.999970e+001	1.835137e+003
7.004738e+001	1.835139e+003
7.009506e+001	1.835140e+003
7.014274e+001	1.835141e+003
7.019043e+001	1.835142e+003
7.023812e+001	1.835144e+003
7.028580e+001	1.835145e+003
7.033348e+001	1.835146e+003
7.038116e+001	1.835148e+003
7.042885e+001	1.835149e+003
7.047653e+001	1.835150e+003
7.052422e+001	1.835151e+003
7.057190e+001	1.835153e+003
7.061959e+001	1.835154e+003
7.066727e+001	1.835155e+003
7.071495e+001	1.835157e+003
7.076263e+001	1.835158e+003
7.081032e+001	1.835159e+003
7.085800e+001	1.835160e+003
7.090569e+001	1.835162e+003
7.095337e+001	1.835163e+003
7.100105e+001	1.835164e+003
7.104873e+001	1.835166e+003
7.109642e+001	1.835167e+003
7.114410e+001	1.835168e+003
7.119179e+001	1.835170e+003
7.123947e+001	1.835171e+003
7.128716e+001	1.835172e+003
7.133484e+001	1.835173e+003
7.138252e+001	1.835175e+003
7.143020e+001	1.835176e+003
7.147789e+001	1.835177e+003
7.152557e+001	1.835179e+003
7.157326e+001	1.835180e+003
7.162094e+001	1.835181e+003
7.166863e+001	1.835183e+003
7.171631e+001	1.835184e+003
7.176399e+001	1.835185e+003
7.181168e+001	1.835186e+003
7.185936e+001	1.835188e+003
7.190705e+001	1.835189e+003
7.195473e+001	1.835191e+003
7.200241e+001	1.835192e+003
7.205009e+001	1.835193e+003
7.209778e+001	1.835194e+003
7.214546e+001	1.835196e+003
7.219315e+001	1.835197e+003
7.224083e+001	1.835198e+003
7.228852e+001	1.835200e+003
7.233620e+001	1.835201e+003
7.238388e+001	1.835202e+003
7.243156e+001	1.835204e+003
7.247925e+001	1.835205e+003
7.252693e+001	1.835207e+003
7.257462e+001	1.835208e+003
7.262230e+001	1.835209e+003
7.266998e+001	1.835210e+003
7.271766e+001	1.835212e+003
7.276535e+001	1.835213e+003
7.281303e+001	1.835214e+003
7.286072e+001	1.835216e+003
7.290840e+001	1.835217e+003
7.295609e+001	1.835218e+003
7.300377e+001	1.835220e+003
7.305145e+001	1.835221e+003
7.309913e+001	1.835222e+003
7.314682e+001	1.835224e+003
7.319450e+001	1.835225e+003
7.324219e+001	1.835227e+003
7.328987e+001	1.835228e+003
7.333755e+001	1.835229e+003
7.338524e+001	1.835231e+003
7.343292e+001	1.835232e+003
7.348061e+001	1.835233e+003
7.352829e+001	1.835235e+003
7.357598e+001	1.835236e+003
7.362366e+001	1.835238e+003
7.367134e+001	1.835239e+003
7.371902e+001	1.835240e+003
7.376671e+001	1.835242e+003
7.381439e+001	1.835243e+003
7.386208e+001	1.835244e+003
7.390976e+001	1.835246e+003
7.395745e+001	1.835247e+003
7.400513e+001	1.835248e+003
7.405281e+001	1.835250e+003
7.410049e+001	1.835251e+003
7.414818e+001	1.835253e+003
7.419586e+001	1.835254e+003
7.424355e+001	1.835255e+003
7.429123e+001	1.835257e+003
7.433891e+001	1.835258e+003
7.438659e+001	1.835259e+003
7.443428e+001	1.835261e+003
7.448196e+001	1.835262e+003
7.452965e+001	1.835264e+003
7.457733e+001	1.835265e+003
7.462502e+001	1.835266e+003
7.467270e+001	1.835268e+003
7.472038e+001	1.835269e+003
7.476806e+001	1.835270e+003
7.481575e+001	1.835272e+003
7.486344e+001	1.835273e+003
7.491112e+001	1.835275e+003
7.495880e+001	1.835276e+003
7.500648e+001	1.835278e+003
7.505417e+001	1.835279e+003
7.510185e+001	1.835280e+003
7.514954e+001	1.835282e+003
7.519722e+001	1.835283e+003
7.524491e+001	1.835285e+003
7.529259e+001	1.835286e+003
7.534027e+001	1.835287e+003
7.538795e+001	1.835289e+003
7.543564e+001	1.835290e+003
7.548332e+001	1.835292e+003
7.553101e+001	1.835293e+003
7.557869e+001	1.835294e+003
7.562637e+001	1.835296e+003
7.567405e+001	1.835297e+003
7.572174e+001	1.835299e+003
7.576942e+001	1.835300e+003
7.581711e+001	1.835301e+003
7.586479e+001	1.835303e+003
7.591248e+001	1.835304e+003
7.596016e+001	1.835306e+003
7.600784e+001	1.835307e+003
7.605552e+001	1.835309e+003
7.610321e+001	1.835310e+003
7.615089e+001	1.835311e+003
7.619858e+001	1.835313e+003
7.624626e+001	1.835314e+003
7.629395e+001	1.835316e+003
7.634163e+001	1.835317e+003
7.638931e+001	1.835319e+003
7.643700e+001	1.835320e+003
7.648468e+001	1.835321e+003
7.653237e+001	1.835323e+003
7.658005e+001	1.835324e+003
7.662773e+001	1.835326e+003
7.667541e+001	1.835327e+003
7.672310e+001	1.835329e+003
7.677078e+001	1.835330e+003
7.681847e+001	1.835332e+003
7.686615e+001	1.835333e+003
7.691384e+001	1.835335e+003
7.696152e+001	1.835336e+003
7.700920e+001	1.835337e+003
7.705688e+001	1.835339e+003
7.710457e+001	1.835340e+003
7.715225e+001	1.835342e+003
7.719994e+001	1.835343e+003
7.724762e+001	1.835345e+003
7.729530e+001	1.835346e+003
7.734298e+001	1.835348e+003
7.739067e+001	1.835349e+003
7.743835e+001	1.835351e+003
7.748604e+001	1.835352e+003
7.753372e+001	1.835354e+003
7.758141e+001	1.835355e+003
7.762909e+001	1.835357e+003
7.767677e+001	1.835358e+003
7.772445e+001	1.835359e+003
7.777214e+001	1.835361e+003
7.781983e+001	1.835362e+003
7.786751e+001	1.835364e+003
7.791520e+001	1.835365e+003
7.796287e+001	1.835367e+003
7.801056e+001	1.835368e+003
7.805824e+001	1.835370e+003
7.810593e+001	1.835371e+003
7.815361e+001	1.835373e+003
7.820130e+001	1.835374e+003
7.824898e+001	1.835376e+003
7.829666e+001	1.835377e+003
7.834434e+001	1.835379e+003
7.839203e+001	1.835380e+003
7.843971e+001	1.835382e+003
7.848740e+001	1.835383e+003
7.853508e+001	1.835385e+003
7.858277e+001	1.835386e+003
7.863045e+001	1.835388e+003
7.867813e+001	1.835389e+003
7.872581e+001	1.835391e+003
7.877350e+001	1.835392e+003
7.882118e+001	1.835394e+003
7.886887e+001	1.835395e+003
7.891655e+001	1.835397e+003
7.896423e+001	1.835398e+003
7.901191e+001	1.835400e+003
7.905960e+001	1.835401e+003
7.910728e+001	1.835403e+003
7.915497e+001	1.835404e+003
7.920265e+001	1.835406e+003
7.925034e+001	1.835407e+003
7.929802e+001	1.835409e+003
7.934570e+001	1.835410e+003
7.939339e+001	1.835412e+003
7.944107e+001	1.835414e+003
7.948876e+001	1.835415e+003
7.953644e+001	1.835417e+003
7.958413e+001	1.835418e+003
7.963180e+001	1.835420e+003
7.967949e+001	1.835421e+003
7.972717e+001	1.835423e+003
7.977486e+001	1.835424e+003
7.982254e+001	1.835426e+003
7.987023e+001	1.835427e+003
7.991791e+001	1.835429e+003
7.996559e+001	1.835430e+003
8.001327e+001	1.835432e+003
8.006096e+001	1.835434e+003
8.010864e+001	1.835435e+003
8.015633e+001	1.835437e+003
8.020401e+001	1.835438e+003
8.025170e+001	1.835440e+003
8.029937e+001	1.835441e+003
8.034706e+001	1.835443e+003
8.039474e+001	1.835444e+003
8.044243e+001	1.835446e+003
8.049011e+001	1.835447e+003
8.053780e+001	1.835449e+003
8.058548e+001	1.835451e+003
8.063316e+001	1.835452e+003
8.068084e+001	1.835454e+003
8.072853e+001	1.835455e+003
8.077621e+001	1.835457e+003
8.082390e+001	1.835458e+003
8.087158e+001	1.835460e+003
8.091927e+001	1.835462e+003
8.096695e+001	1.835463e+003
8.101463e+001	1.835465e+003
8.106232e+001	1.835466e+003
8.111000e+001	1.835468e+003
8.115769e+001	1.835469e+003
8.120537e+001	1.835471e+003
8.125305e+001	1.835473e+003
8.130073e+001	1.835474e+003
8.134842e+001	1.835476e+003
8.139610e+001	1.835477e+003
8.144379e+001	1.835479e+003
8.149147e+001	1.835481e+003
8.153916e+001	1.835482e+003
8.158684e+001	1.835484e+003
8.163452e+001	1.835485e+003
8.168220e+001	1.835487e+003
8.172989e+001	1.835488e+003
8.177757e+001	1.835490e+003
8.182526e+001	1.835492e+003
8.187294e+001	1.835493e+003
8.192063e+001	1.835495e+003
8.196830e+001	1.835497e+003
8.201599e+001	1.835498e+003
8.206367e+001	1.835500e+003
8.211136e+001	1.835501e+003
8.215904e+001	1.835503e+003
8.220673e+001	1.835505e+003
8.225441e+001	1.835506e+003
8.230209e+001	1.835508e+003
8.234977e+001	1.835509e+003
8.239746e+001	1.835511e+003
8.244515e+001	1.835513e+003
8.249283e+001	1.835514e+003
8.254052e+001	1.835516e+003
8.258820e+001	1.835518e+003
8.263588e+001	1.835519e+003
8.268356e+001	1.835521e+003
8.273125e+001	1.835522e+003
8.277893e+001	1.835524e+003
8.282662e+001	1.835526e+003
8.287430e+001	1.835527e+003
8.292198e+001	1.835529e+003
8.296966e+001	1.835531e+003
8.301735e+001	1.835532e+003
8.306503e+001	1.835534e+003
8.311272e+001	1.835535e+003
8.316040e+001	1.835537e+003
8.320809e+001	1.835539e+003
8.325577e+001	1.835540e+003
8.330345e+001	1.835542e+003
8.335113e+001	1.835544e+003
8.339882e+001	1.835545e+003
8.344650e+001	1.835547e+003
8.349419e+001	1.835549e+003
8.354187e+001	1.835550e+003
8.358955e+001	1.835552e+003
8.363723e+001	1.835554e+003
8.368492e+001	1.835555e+003
8.373260e+001	1.835557e+003
8.378029e+001	1.835559e+003
8.382797e+001	1.835560e+003
8.387566e+001	1.835562e+003
8.392334e+001	1.835564e+003
8.397102e+001	1.835565e+003
8.401871e+001	1.835567e+003
8.406639e+001	1.835569e+003
8.411408e+001	1.835571e+003
8.416176e+001	1.835572e+003
8.420945e+001	1.835574e+003
8.425713e+001	1.835576e+003
8.430481e+001	1.835577e+003
8.435249e+001	1.835579e+003
8.440018e+001	1.835581e+003
8.444786e+001	1.835582e+003
8.449555e+001	1.835584e+003
8.454323e+001	1.835586e+003
8.459091e+001	1.835587e+003
8.463859e+001	1.835589e+003
8.468628e+001	1.835591e+003
8.473396e+001	1.835592e+003
8.478165e+001	1.835594e+003
8.482933e+001	1.835596e+003
8.487702e+001	1.835597e+003
8.492470e+001	1.835599e+003
8.497238e+001	1.835601e+003
8.502006e+001	1.835603e+003
8.506775e+001	1.835604e+003
8.511543e+001	1.835606e+003
8.516312e+001	1.835608e+003
8.521080e+001	1.835609e+003
8.525848e+001	1.835611e+003
8.530616e+001	1.835613e+003
8.535385e+001	1.835615e+003
8.540153e+001	1.835616e+003
8.544922e+001	1.835618e+003
8.549691e+001	1.835620e+003
8.554459e+001	1.835622e+003
8.559227e+001	1.835623e+003
8.563995e+001	1.835625e+003
8.568764e+001	1.835627e+003
8.573532e+001	1.835628e+003
8.578301e+001	1.835630e+003
8.583069e+001	1.835632e+003
8.587838e+001	1.835634e+003
8.592605e+001	1.835635e+003
8.597374e+001	1.835637e+003
8.602142e+001	1.835639e+003
8.606911e+001	1.835641e+003
8.611679e+001	1.835642e+003
8.616448e+001	1.835644e+003
8.621216e+001	1.835646e+003
8.625984e+001	1.835648e+003
8.630752e+001	1.835649e+003
8.635521e+001	1.835651e+003
8.640289e+001	1.835653e+003
8.645058e+001	1.835655e+003
8.649826e+001	1.835656e+003
8.654595e+001	1.835658e+003
8.659363e+001	1.835660e+003
8.664131e+001	1.835662e+003
8.668899e+001	1.835664e+003
8.673668e+001	1.835665e+003
8.678436e+001	1.835667e+003
8.683205e+001	1.835669e+003
8.687973e+001	1.835671e+003
8.692741e+001	1.835672e+003
8.697509e+001	1.835674e+003
8.702278e+001	1.835676e+003
8.707047e+001	1.835678e+003
8.711815e+001	1.835680e+003
8.716584e+001	1.835681e+003
8.721352e+001	1.835683e+003
8.726120e+001	1.835685e+003
8.730888e+001	1.835687e+003
8.735657e+001	1.835689e+003
8.740425e+001	1.835690e+003
8.745194e+001	1.835692e+003
8.749962e+001	1.835694e+003
8.754730e+001	1.835696e+003
8.759498e+001	1.835697e+003
8.764267e+001	1.835699e+003
8.769035e+001	1.835701e+003
8.773804e+001	1.835703e+003
8.778572e+001	1.835705e+003
8.783341e+001	1.835706e+003
8.788109e+001	1.835708e+003
8.792877e+001	1.835710e+003
8.797645e+001	1.835712e+003
8.802414e+001	1.835714e+003
8.807182e+001	1.835716e+003
8.811951e+001	1.835717e+003
8.816719e+001	1.835719e+003
8.821488e+001	1.835721e+003
8.826255e+001	1.835723e+003
8.831024e+001	1.835725e+003
8.835792e+001	1.835727e+003
8.840561e+001	1.835728e+003
8.845329e+001	1.835730e+003
8.850098e+001	1.835732e+003
8.854866e+001	1.835734e+003
8.859634e+001	1.835736e+003
8.864403e+001	1.835738e+003
8.869171e+001	1.835739e+003
8.873940e+001	1.835741e+003
8.878708e+001	1.835743e+003
8.883477e+001	1.835745e+003
8.888245e+001	1.835747e+003
8.893013e+001	1.835749e+003
8.897781e+001	1.835751e+003
8.902550e+001	1.835753e+003
8.907318e+001	1.835754e+003
8.912087e+001	1.835756e+003
8.916855e+001	1.835758e+003
8.921623e+001	1.835760e+003
8.926391e+001	1.835762e+003
8.931160e+001	1.835764e+003
8.935928e+001	1.835765e+003
8.940697e+001	1.835767e+003
8.945465e+001	1.835769e+003
8.950234e+001	1.835771e+003
8.955002e+001	1.835773e+003
8.959770e+001	1.835775e+003
8.964538e+001	1.835777e+003
8.969307e+001	1.835779e+003
8.974075e+001	1.835781e+003
8.978844e+001	1.835782e+003
8.983612e+001	1.835784e+003
8.988380e+001	1.835786e+003
8.993148e+001	1.835788e+003
8.997917e+001	1.835790e+003
9.002686e+001	1.835792e+003
9.007454e+001	1.835794e+003
9.012223e+001	1.835796e+003
9.016991e+001	1.835798e+003
9.021759e+001	1.835800e+003
9.026527e+001	1.835801e+003
9.031296e+001	1.835803e+003
9.036064e+001	1.835805e+003
9.040833e+001	1.835807e+003
9.045601e+001	1.835809e+003
9.050370e+001	1.835811e+003
9.055138e+001	1.835813e+003
9.059906e+001	1.835815e+003
9.064674e+001	1.835817e+003
9.069443e+001	1.835819e+003
9.074211e+001	1.835821e+003
9.078980e+001	1.835823e+003
9.083748e+001	1.835825e+003
9.088516e+001	1.835826e+003
9.093284e+001	1.835828e+003
9.098053e+001	1.835830e+003
9.102821e+001	1.835832e+003
9.107590e+001	1.835834e+003
9.112358e+001	1.835836e+003
9.117127e+001	1.835838e+003
9.121895e+001	1.835840e+003
9.126663e+001	1.835842e+003
9.131431e+001	1.835844e+003
9.136200e+001	1.835846e+003
9.140968e+001	1.835848e+003
9.145737e+001	1.835850e+003
9.150505e+001	1.835852e+003
9.155273e+001	1.835854e+003
9.160042e+001	1.835856e+003
9.164810e+001	1.835858e+003
9.169579e+001	1.835860e+003
9.174347e+001	1.835862e+003
9.179116e+001	1.835864e+003
9.183884e+001	1.835866e+003
9.188652e+001	1.835867e+003
9.193420e+001	1.835869e+003
9.198189e+001	1.835872e+003
9.202957e+001	1.835873e+003
9.207726e+001	1.835875e+003
9.212494e+001	1.835878e+003
9.217262e+001	1.835879e+003
9.222030e+001	1.835881e+003
9.226799e+001	1.835883e+003
9.231567e+001	1.835885e+003
9.236336e+001	1.835887e+003
9.241104e+001	1.835889e+003
9.245873e+001	1.835891e+003
9.250641e+001	1.835893e+003
9.255409e+001	1.835895e+003
9.260177e+001	1.835897e+003
9.264946e+001	1.835899e+003
9.269714e+001	1.835901e+003
9.274483e+001	1.835904e+003
9.279251e+001	1.835905e+003
9.284020e+001	1.835908e+003
9.288788e+001	1.835909e+003
9.293556e+001	1.835912e+003
9.298324e+001	1.835914e+003
9.303093e+001	1.835916e+003
9.307861e+001	1.835918e+003
9.312630e+001	1.835920e+003
9.317398e+001	1.835922e+003
9.322166e+001	1.835924e+003
9.326935e+001	1.835926e+003
9.331703e+001	1.835928e+003
9.336472e+001	1.835930e+003
9.341240e+001	1.835932e+003
9.346009e+001	1.835934e+003
9.350777e+001	1.835936e+003
9.355545e+001	1.835938e+003
9.360313e+001	1.835940e+003
9.365082e+001	1.835942e+003
9.369850e+001	1.835944e+003
9.374619e+001	1.835946e+003
9.379387e+001	1.835948e+003
9.384155e+001	1.835950e+003
9.388923e+001	1.835952e+003
9.393692e+001	1.835955e+003
9.398460e+001	1.835957e+003
9.403229e+001	1.835959e+003
9.407997e+001	1.835961e+003
9.412766e+001	1.835963e+003
9.417534e+001	1.835965e+003
9.422302e+001	1.835967e+003
9.427070e+001	1.835969e+003
9.431839e+001	1.835971e+003
9.436607e+001	1.835973e+003
9.441376e+001	1.835975e+003
9.446144e+001	1.835977e+003
9.450912e+001	1.835979e+003
9.455680e+001	1.835982e+003
9.460449e+001	1.835984e+003
9.465218e+001	1.835986e+003
9.469986e+001	1.835988e+003
9.474755e+001	1.835990e+003
9.479523e+001	1.835992e+003
9.484291e+001	1.835994e+003
9.489059e+001	1.835996e+003
9.493828e+001	1.835998e+003
9.498596e+001	1.836001e+003
9.503365e+001	1.836003e+003
9.508133e+001	1.836005e+003
9.512902e+001	1.836007e+003
9.517670e+001	1.836009e+003
9.522438e+001	1.836011e+003
9.527206e+001	1.836013e+003
9.531975e+001	1.836015e+003
9.536743e+001	1.836018e+003
9.541512e+001	1.836020e+003
9.546280e+001	1.836022e+003
9.551048e+001	1.836024e+003
9.555816e+001	1.836026e+003
9.560585e+001	1.836028e+003
9.565353e+001	1.836030e+003
9.570122e+001	1.836033e+003
9.574890e+001	1.836035e+003
9.579659e+001	1.836037e+003
9.584427e+001	1.836039e+003
9.589195e+001	1.836041e+003
9.593963e+001	1.836043e+003
9.598732e+001	1.836045e+003
9.603500e+001	1.836048e+003
9.608269e+001	1.836050e+003
9.613038e+001	1.836052e+003
9.617805e+001	1.836054e+003
9.622574e+001	1.836056e+003
9.627342e+001	1.836059e+003
9.632111e+001	1.836061e+003
9.636879e+001	1.836063e+003
9.641648e+001	1.836065e+003
9.646416e+001	1.836067e+003
9.651184e+001	1.836070e+003
9.655952e+001	1.836072e+003
9.660721e+001	1.836074e+003
9.665489e+001	1.836076e+003
9.670258e+001	1.836078e+003
9.675026e+001	1.836080e+003
9.679795e+001	1.836083e+003
9.684562e+001	1.836085e+003
9.689331e+001	1.836087e+003
9.694099e+001	1.836089e+003
9.698868e+001	1.836091e+003
9.703636e+001	1.836094e+003
9.708405e+001	1.836096e+003
9.713173e+001	1.836098e+003
9.717941e+001	1.836100e+003
9.722709e+001	1.836103e+003
9.727478e+001	1.836105e+003
9.732246e+001	1.836107e+003
9.737015e+001	1.836109e+003
9.741783e+001	1.836112e+003
9.746552e+001	1.836114e+003
9.751320e+001	1.836116e+003
9.756088e+001	1.836118e+003
9.760856e+001	1.836120e+003
9.765625e+001	1.836123e+003
9.770394e+001	1.836125e+003
9.775162e+001	1.836127e+003
9.779930e+001	1.836129e+003
9.784698e+001	1.836132e+003
9.789467e+001	1.836134e+003
9.794235e+001	1.836136e+003
9.799004e+001	1.836138e+003
9.803772e+001	1.836141e+003
9.808541e+001	1.836143e+003
9.813309e+001	1.836145e+003
9.818077e+001	1.836148e+003
9.822845e+001	1.836150e+003
9.827614e+001	1.836152e+003
9.832382e+001	1.836154e+003
9.837151e+001	1.836157e+003
9.841919e+001	1.836159e+003
9.846688e+001	1.836161e+003
9.851455e+001	1.836164e+003
9.856224e+001	1.836166e+003
9.860992e+001	1.836168e+003
9.865761e+001	1.836170e+003
9.870529e+001	1.836173e+003
9.875298e+001	1.836175e+003
9.880066e+001	1.836177e+003
9.884834e+001	1.836180e+003
9.889602e+001	1.836182e+003
9.894371e+001	1.836184e+003
9.899139e+001	1.836187e+003
9.903908e+001	1.836189e+003
9.908676e+001	1.836191e+003
9.913445e+001	1.836194e+003
9.918212e+001	1.836196e+003
9.922981e+001	1.836198e+003
9.927750e+001	1.836200e+003
9.932518e+001	1.836203e+003
9.937287e+001	1.836205e+003
9.942055e+001	1.836208e+003
9.946823e+001	1.836210e+003
9.951591e+001	1.836212e+003
9.956360e+001	1.836215e+003
9.961128e+001	1.836217e+003
9.965897e+001	1.836219e+003
9.970665e+001	1.836222e+003
9.975434e+001	1.836224e+003
9.980202e+001	1.836226e+003
9.984970e+001	1.836229e+003
9.989738e+001	1.836231e+003
9.994507e+001	1.836233e+003
9.999275e+001	1.836236e+003
1.000404e+002	1.836238e+003
1.000881e+002	1.836241e+003
1.001358e+002	1.836243e+003
1.001835e+002	1.836245e+003
1.002312e+002	1.836248e+003
[truncated: 39,841 more rows]
