# Supplementary material for: Contact-free experimental determination of the static flexural spring constant of cantilever sensors using a microfluidic force tool
Source: Beilstein J Nanotechnol. 2016 Mar 30;7:492–500. doi: 10.3762/bjnano.7.43 (PMC4901535; doi:10.3762/bjnano.7.43)
Supplement: File 1 — Raw data of thermal noise spectra, cantilever deflection under fluid flow, and sensitivity values σ1. [file Beilstein_J_Nanotechnol-07-492-s001.zip › Supporting information and raw data/RC2um-1-perpg2_pvsPD.lvm]

	0.043626	0.190211
	0.043626	0.190158
	0.043626	0.190179
	0.043626	0.190194
	0.043626	0.190192
	0.043626	0.190204
	0.043626	0.190250
	0.043626	0.190208
	0.043626	0.190198
	0.043626	0.190171
	0.043626	0.190160
	0.043626	0.190182
	0.057491	0.191250
	0.057491	0.191225
	0.057491	0.191237
	0.057491	0.191206
	0.057491	0.191191
	0.057491	0.191222
	0.057491	0.191178
	0.057491	0.191224
	0.057491	0.191268
	0.057491	0.191226
	0.078513	0.192884
	0.078513	0.192916
	0.078513	0.192946
	0.078513	0.192960
	0.078513	0.192997
	0.078513	0.192969
	0.078513	0.192916
	0.078513	0.192927
	0.078513	0.192951
	0.078513	0.192956
	0.128452	0.195686
	0.128452	0.195718
	0.128452	0.195699
	0.128452	0.195694
	0.128452	0.195696
	0.128452	0.195721
	0.128452	0.195713
	0.128452	0.195724
	0.128452	0.195705
	0.128452	0.195703
	0.203006	0.202796
	0.203006	0.202875
	0.203006	0.202854
	0.203006	0.202893
	0.203006	0.202903
	0.203006	0.202920
	0.203006	0.202924
	0.203006	0.202949
	0.203006	0.202931
	0.203006	0.202931
	0.305938	0.219532
	0.305938	0.219597
	0.305938	0.219634
	0.305938	0.219681
	0.305938	0.219728
	0.305938	0.219742
	0.305938	0.219778
	0.305938	0.219784
	0.305938	0.219762
	0.305938	0.219777
	0.430532	0.247742
	0.430532	0.247842
	0.430532	0.247842
	0.430532	0.247988
	0.430532	0.247743
	0.430532	0.247695
	0.430532	0.247904
	0.430532	0.247874
	0.430532	0.247939
	0.430532	0.248117
	0.569828	0.289012
	0.569828	0.289071
	0.569828	0.289082
	0.569828	0.289109
	0.569828	0.289137
	0.569828	0.289187
	0.569828	0.289177
	0.569828	0.289158
	0.569828	0.289142
	0.569828	0.289156
	0.718121	0.344018
	0.718121	0.344047
	0.718121	0.344071
	0.718121	0.344099
	0.718121	0.344167
	0.718121	0.344125
	0.718121	0.344148
	0.718121	0.344166
	0.718121	0.344166
	0.718121	0.344199
	0.878478	0.414525
	0.878478	0.414609
	0.878478	0.414669
	0.878478	0.414720
	0.878478	0.414743
	0.878478	0.414806
	0.878478	0.414787
	0.878478	0.414832
	0.878478	0.414812
	0.878478	0.414837
	1.051130	0.503570
	1.051130	0.503673
	1.051130	0.503772
	1.051130	0.503849
	1.051130	0.503928
	1.051130	0.503976
	1.051130	0.504004
	1.051130	0.504149
	1.051130	0.504203
	1.051130	0.504213
	1.221856	0.603449
	1.221856	0.603550
	1.221856	0.603692
	1.221856	0.603793
	1.221856	0.603865
	1.221856	0.603957
	1.221856	0.604039
	1.221856	0.604115
	1.221856	0.603987
	1.221856	0.604117
	1.390309	0.716915
	1.390309	0.717208
	1.390309	0.717319
	1.390309	0.717423
	1.390309	0.717474
	1.390309	0.717630
	1.390309	0.717791
	1.390309	0.717898
	1.390309	0.718013
	1.390309	0.717994
	1.561758	0.844420
	1.561758	0.844464
	1.561758	0.844583
	1.561758	0.844655
	1.561758	0.844706
	1.561758	0.844769
	1.561758	0.844953
	1.561758	0.844965
	1.561758	0.845022
	1.561758	0.844926
	1.736174	0.995109
	1.736174	0.995808
	1.736174	0.996034
	1.736174	0.995687
	1.736174	0.996221
	1.736174	0.996289
	1.736174	0.996239
	1.736174	0.996174
	1.736174	0.996499
	1.736174	0.996484
	1.894327	1.136612
	1.894327	1.136941
	1.894327	1.136954
	1.894327	1.137098
	1.894327	1.137135
	1.894327	1.137395
	1.894327	1.137248
	1.894327	1.137334
	1.894327	1.137533
	1.894327	1.137639
	2.044599	1.284449
	2.044599	1.284828
	2.044599	1.285224
	2.044599	1.285602
	2.044599	1.285380
	2.044599	1.285283
	2.044599	1.285674
	2.044599	1.286353
	2.044599	1.285672
	2.044599	1.285988
	2.189075	1.429293
	2.189075	1.429861
	2.189075	1.430024
	2.189075	1.430270
	2.189075	1.430329
	2.189075	1.430718
	2.189075	1.430761
	2.189075	1.430950
	2.189075	1.431272
	2.189075	1.431402
	2.189075	1.431276
	2.189075	1.431807
	2.189075	1.432190
	2.189075	1.432020
	2.189075	1.432009
	2.189075	1.432283
	2.189075	1.432553
	2.189075	1.432686
	2.189075	1.432769
	2.189075	1.433000
	2.189075	1.433253
	2.189075	1.433298
	2.189075	1.433665
	2.189075	1.433597
	2.189075	1.433878
	2.189075	1.433904
	2.189075	1.433894
	2.189075	1.433396
	2.189075	1.434018
	2.189075	1.434161
	2.189075	1.434145
	2.189075	1.433494
	2.189075	1.433715
	2.189075	1.433651
	2.189075	1.433262
	2.189075	1.433260
	2.189075	1.433290
	2.189075	1.432971
	2.189075	1.432867
	2.189075	1.432372
	2.189075	1.432188
	2.189075	1.431618
	2.189075	1.431753
	2.189075	1.431156
	2.189075	1.430964
	2.189075	1.430612
	2.189075	1.430183
	2.189075	1.430025
	2.189075	1.429980
	2.189075	1.429763
	2.189075	1.429567
	2.189075	1.429040
	2.189075	1.429083
	2.189075	1.429029
	2.189075	1.428758
	2.189075	1.428277
	2.189075	1.428421
	2.189075	1.427852
	2.189075	1.427970
	2.189075	1.427850
	2.189075	1.427554
	2.189075	1.427377
	2.189075	1.426532
	2.189075	1.426800
	2.189075	1.426598
	2.189075	1.426673
	2.189075	1.425695
	2.189075	1.425388
	2.189075	1.425164
	2.189075	1.424700
	2.189075	1.424057
	2.189075	1.424229
	2.189075	1.423906
	2.189075	1.423389
	2.189075	1.423335
	2.189075	1.423374
	2.189075	1.422780
	2.189075	1.422431
	2.189075	1.422015
	2.189075	1.421592
	2.189075	1.421370
	2.444234	1.696697
	2.444234	1.697084
	2.444234	1.697576
	2.444234	1.697594
	2.444234	1.697886
	2.444234	1.698061
	2.444234	1.698367
	2.444234	1.697832
	2.444234	1.697992
	2.444234	1.697572
	2.363390	1.620983
	2.363390	1.621320
	2.363390	1.620710
	2.363390	1.621239
	2.363390	1.621196
	2.363390	1.621213
	2.363390	1.621156
	2.363390	1.621753
	2.363390	1.621382
	2.363390	1.621563
	2.278632	1.531338
	2.278632	1.531831
	2.278632	1.532144
	2.278632	1.532427
	2.278632	1.532646
	2.278632	1.532759
	2.278632	1.532957
	2.278632	1.532783
	2.278632	1.533150
	2.278632	1.533004
	2.111287	1.362211
	2.111287	1.362246
	2.111287	1.362826
	2.111287	1.362869
	2.111287	1.362852
	2.111287	1.362435
	2.111287	1.362762
	2.111287	1.362374
	2.111287	1.361592
	2.111287	1.361634
	1.905739	1.155959
	1.905739	1.156036
	1.905739	1.155416
	1.905739	1.155272
	1.905739	1.155212
	1.905739	1.154922
	1.905739	1.154826
	1.905739	1.154377
	1.905739	1.154772
	1.905739	1.154626
	1.685176	0.952811
	1.685176	0.952554
	1.685176	0.952603
	1.685176	0.952620
	1.685176	0.952227
	1.685176	0.952319
	1.685176	0.952215
	1.685176	0.952078
	1.685176	0.952014
	1.685176	0.951621
	1.436562	0.752276
	1.436562	0.752063
	1.436562	0.751954
	1.436562	0.751824
	1.436562	0.751835
	1.436562	0.751920
	1.436562	0.751753
	1.436562	0.751727
	1.436562	0.751291
	1.436562	0.751454
	1.195213	0.586925
	1.195213	0.586936
	1.195213	0.586855
	1.195213	0.586665
	1.195213	0.586647
	1.195213	0.586707
	1.195213	0.586683
	1.195213	0.586466
	1.195213	0.586404
	1.195213	0.586464
	0.949071	0.447166
	0.949071	0.447134
	0.949071	0.447118
	0.949071	0.447071
	0.949071	0.447057
	0.949071	0.447008
	0.949071	0.446980
	0.949071	0.446936
	0.949071	0.446902
	0.949071	0.446835
	0.718223	0.341566
	0.718223	0.341586
	0.718223	0.341581
	0.718223	0.341547
	0.718223	0.341578
	0.718223	0.341512
	0.718223	0.341527
	0.718223	0.341530
	0.718223	0.341475
	0.718223	0.341499
	0.509570	0.267333
	0.509570	0.267331
	0.509570	0.267351
	0.509570	0.267354
	0.509570	0.267386
	0.509570	0.267377
	0.509570	0.267378
	0.509570	0.267438
	0.509570	0.267404
	0.509570	0.267399
	0.331895	0.222853
	0.331895	0.222914
	0.331895	0.222942
	0.331895	0.222909
	0.331895	0.222897
	0.331895	0.222908
	0.331895	0.222952
	0.331895	0.222898
	0.331895	0.222919
	0.331895	0.222946
	0.183560	0.199611
	0.183560	0.199662
	0.183560	0.199695
	0.183560	0.199709
	0.183560	0.199726
	0.183560	0.199713
	0.183560	0.199728
	0.183560	0.199721
	0.183560	0.199738
	0.183560	0.199750
	0.092628	0.192096
	0.092628	0.192146
	0.092628	0.192160
	0.092628	0.192251
	0.092628	0.192251
	0.092628	0.192264
	0.092628	0.192277
	0.092628	0.192305
	0.092628	0.192311
	0.092628	0.192324
	0.058005	0.188648
	0.058005	0.188690
	0.058005	0.188709
	0.058005	0.188723
	0.058005	0.188765
	0.058005	0.188779
	0.058005	0.188787
	0.058005	0.188786
	0.058005	0.188803
	0.058005	0.188824
	0.046680	0.187380
	0.046680	0.187440
	0.046680	0.187471
	0.046680	0.187460
	0.046680	0.187494
	0.046680	0.187493
	0.046680	0.187484
	0.046680	0.187488
	0.046680	0.187518
	0.046680	0.187523
	0.044264	0.187262
	0.044264	0.187277
	0.044264	0.187317
	0.044264	0.187311
	0.044264	0.187325
	0.044264	0.187379
	0.044264	0.187399
	0.044264	0.187409
	0.044264	0.187399
	0.044264	0.187410
	0.044481	0.187376
	0.044481	0.187406
	0.044481	0.187389
	0.044481	0.187395
	0.044481	0.187409
	0.044481	0.187393
	0.044481	0.187404
	0.044481	0.187173
