# Supplementary material for: Contact-free experimental determination of the static flexural spring constant of cantilever sensors using a microfluidic force tool
Source: Beilstein J Nanotechnol. 2016 Mar 30;7:492–500. doi: 10.3762/bjnano.7.43 (PMC4901535; doi:10.3762/bjnano.7.43)
Supplement: File 1 — Raw data of thermal noise spectra, cantilever deflection under fluid flow, and sensitivity values σ1. [file Beilstein_J_Nanotechnol-07-492-s001.zip › Supporting information and raw data/RC2um_perpg2_h100_ch120_offset0_tune1_2.txt]

kHz	fm�/Hz
4.959106e+000	6.683899e+003
5.006790e+000	6.683901e+003
5.054474e+000	6.683902e+003
5.102158e+000	6.683904e+003
5.149841e+000	6.683906e+003
5.197525e+000	6.683908e+003
5.245209e+000	6.683909e+003
5.292893e+000	6.683911e+003
5.340576e+000	6.683913e+003
5.388260e+000	6.683914e+003
5.435943e+000	6.683916e+003
5.483627e+000	6.683918e+003
5.531311e+000	6.683920e+003
5.578995e+000	6.683921e+003
5.626679e+000	6.683923e+003
5.674362e+000	6.683924e+003
5.722046e+000	6.683927e+003
5.769729e+000	6.683928e+003
5.817413e+000	6.683930e+003
5.865097e+000	6.683931e+003
5.912781e+000	6.683934e+003
5.960464e+000	6.683935e+003
6.008148e+000	6.683937e+003
6.055832e+000	6.683938e+003
6.103516e+000	6.683941e+003
6.151199e+000	6.683942e+003
6.198883e+000	6.683944e+003
6.246567e+000	6.683946e+003
6.294250e+000	6.683948e+003
6.341934e+000	6.683949e+003
6.389618e+000	6.683951e+003
6.437302e+000	6.683953e+003
6.484985e+000	6.683955e+003
6.532669e+000	6.683956e+003
6.580353e+000	6.683958e+003
6.628037e+000	6.683960e+003
6.675720e+000	6.683961e+003
6.723404e+000	6.683964e+003
6.771088e+000	6.683965e+003
6.818771e+000	6.683967e+003
6.866455e+000	6.683968e+003
6.914139e+000	6.683971e+003
6.961822e+000	6.683972e+003
7.009506e+000	6.683974e+003
7.057190e+000	6.683976e+003
7.104874e+000	6.683978e+003
7.152558e+000	6.683979e+003
7.200241e+000	6.683981e+003
7.247925e+000	6.683983e+003
7.295608e+000	6.683985e+003
7.343292e+000	6.683987e+003
7.390976e+000	6.683988e+003
7.438660e+000	6.683990e+003
7.486343e+000	6.683992e+003
7.534027e+000	6.683994e+003
7.581711e+000	6.683995e+003
7.629395e+000	6.683998e+003
7.677078e+000	6.683999e+003
7.724762e+000	6.684001e+003
7.772446e+000	6.684003e+003
7.820129e+000	6.684005e+003
7.867813e+000	6.684007e+003
7.915497e+000	6.684008e+003
7.963181e+000	6.684010e+003
8.010864e+000	6.684012e+003
8.058548e+000	6.684014e+003
8.106231e+000	6.684015e+003
8.153916e+000	6.684018e+003
8.201600e+000	6.684019e+003
8.249283e+000	6.684021e+003
8.296967e+000	6.684023e+003
8.344650e+000	6.684025e+003
8.392334e+000	6.684027e+003
8.440018e+000	6.684028e+003
8.487701e+000	6.684030e+003
8.535385e+000	6.684032e+003
8.583068e+000	6.684034e+003
8.630753e+000	6.684035e+003
8.678437e+000	6.684038e+003
8.726120e+000	6.684039e+003
8.773804e+000	6.684042e+003
8.821487e+000	6.684043e+003
8.869171e+000	6.684045e+003
8.916854e+000	6.684047e+003
8.964539e+000	6.684048e+003
9.012223e+000	6.684051e+003
9.059906e+000	6.684052e+003
9.107590e+000	6.684055e+003
9.155273e+000	6.684056e+003
9.202957e+000	6.684058e+003
9.250641e+000	6.684060e+003
9.298324e+000	6.684062e+003
9.346008e+000	6.684064e+003
9.393692e+000	6.684065e+003
9.441376e+000	6.684067e+003
9.489060e+000	6.684069e+003
9.536743e+000	6.684071e+003
9.584427e+000	6.684073e+003
9.632110e+000	6.684075e+003
9.679794e+000	6.684077e+003
9.727479e+000	6.684079e+003
9.775162e+000	6.684081e+003
9.822846e+000	6.684082e+003
9.870529e+000	6.684084e+003
9.918213e+000	6.684086e+003
9.965896e+000	6.684088e+003
1.001358e+001	6.684090e+003
1.006126e+001	6.684092e+003
1.010895e+001	6.684094e+003
1.015663e+001	6.684095e+003
1.020432e+001	6.684098e+003
1.025200e+001	6.684099e+003
1.029968e+001	6.684102e+003
1.034737e+001	6.684103e+003
1.039505e+001	6.684106e+003
1.044273e+001	6.684107e+003
1.049042e+001	6.684109e+003
1.053810e+001	6.684111e+003
1.058579e+001	6.684112e+003
1.063347e+001	6.684115e+003
1.068115e+001	6.684116e+003
1.072884e+001	6.684119e+003
1.077652e+001	6.684120e+003
1.082420e+001	6.684122e+003
1.087189e+001	6.684124e+003
1.091957e+001	6.684126e+003
1.096725e+001	6.684128e+003
1.101494e+001	6.684130e+003
1.106262e+001	6.684132e+003
1.111031e+001	6.684134e+003
1.115799e+001	6.684136e+003
1.120567e+001	6.684138e+003
1.125336e+001	6.684140e+003
1.130104e+001	6.684142e+003
1.134872e+001	6.684144e+003
1.139641e+001	6.684146e+003
1.144409e+001	6.684148e+003
1.149178e+001	6.684149e+003
1.153946e+001	6.684152e+003
1.158714e+001	6.684153e+003
1.163483e+001	6.684156e+003
1.168251e+001	6.684157e+003
1.173019e+001	6.684159e+003
1.177788e+001	6.684161e+003
1.182556e+001	6.684163e+003
1.187325e+001	6.684165e+003
1.192093e+001	6.684167e+003
1.196861e+001	6.684169e+003
1.201630e+001	6.684171e+003
1.206398e+001	6.684173e+003
1.211166e+001	6.684175e+003
1.215935e+001	6.684177e+003
1.220703e+001	6.684179e+003
1.225471e+001	6.684181e+003
1.230240e+001	6.684183e+003
1.235008e+001	6.684185e+003
1.239777e+001	6.684187e+003
1.244545e+001	6.684189e+003
1.249313e+001	6.684191e+003
1.254082e+001	6.684193e+003
1.258850e+001	6.684195e+003
1.263618e+001	6.684197e+003
1.268387e+001	6.684199e+003
1.273155e+001	6.684201e+003
1.277924e+001	6.684203e+003
1.282692e+001	6.684205e+003
1.287460e+001	6.684207e+003
1.292229e+001	6.684209e+003
1.296997e+001	6.684211e+003
1.301765e+001	6.684213e+003
1.306534e+001	6.684215e+003
1.311302e+001	6.684217e+003
1.316071e+001	6.684219e+003
1.320839e+001	6.684221e+003
1.325607e+001	6.684223e+003
1.330376e+001	6.684225e+003
1.335144e+001	6.684227e+003
1.339912e+001	6.684229e+003
1.344681e+001	6.684231e+003
1.349449e+001	6.684233e+003
1.354218e+001	6.684235e+003
1.358986e+001	6.684237e+003
1.363754e+001	6.684240e+003
1.368523e+001	6.684241e+003
1.373291e+001	6.684243e+003
1.378059e+001	6.684246e+003
1.382828e+001	6.684247e+003
1.387596e+001	6.684250e+003
1.392364e+001	6.684251e+003
1.397133e+001	6.684253e+003
1.401901e+001	6.684256e+003
1.406670e+001	6.684257e+003
1.411438e+001	6.684260e+003
1.416206e+001	6.684262e+003
1.420975e+001	6.684263e+003
1.425743e+001	6.684266e+003
1.430512e+001	6.684268e+003
1.435280e+001	6.684270e+003
1.440048e+001	6.684272e+003
1.444817e+001	6.684274e+003
1.449585e+001	6.684277e+003
1.454353e+001	6.684278e+003
1.459122e+001	6.684280e+003
1.463890e+001	6.684283e+003
1.468658e+001	6.684284e+003
1.473427e+001	6.684287e+003
1.478195e+001	6.684289e+003
1.482964e+001	6.684290e+003
1.487732e+001	6.684293e+003
1.492500e+001	6.684295e+003
1.497269e+001	6.684297e+003
1.502037e+001	6.684299e+003
1.506805e+001	6.684301e+003
1.511574e+001	6.684303e+003
1.516342e+001	6.684305e+003
1.521111e+001	6.684307e+003
1.525879e+001	6.684310e+003
1.530647e+001	6.684312e+003
1.535416e+001	6.684314e+003
1.540184e+001	6.684316e+003
1.544952e+001	6.684318e+003
1.549721e+001	6.684320e+003
1.554489e+001	6.684322e+003
1.559258e+001	6.684324e+003
1.564026e+001	6.684327e+003
1.568794e+001	6.684329e+003
1.573563e+001	6.684330e+003
1.578331e+001	6.684333e+003
1.583099e+001	6.684335e+003
1.587868e+001	6.684337e+003
1.592636e+001	6.684339e+003
1.597404e+001	6.684341e+003
1.602173e+001	6.684344e+003
1.606941e+001	6.684346e+003
1.611710e+001	6.684348e+003
1.616478e+001	6.684350e+003
1.621246e+001	6.684352e+003
1.626015e+001	6.684354e+003
1.630783e+001	6.684357e+003
1.635551e+001	6.684358e+003
1.640320e+001	6.684360e+003
1.645088e+001	6.684363e+003
1.649857e+001	6.684365e+003
1.654625e+001	6.684367e+003
1.659393e+001	6.684369e+003
1.664162e+001	6.684371e+003
1.668930e+001	6.684374e+003
1.673698e+001	6.684376e+003
1.678467e+001	6.684378e+003
1.683235e+001	6.684381e+003
1.688004e+001	6.684382e+003
1.692772e+001	6.684384e+003
1.697540e+001	6.684387e+003
1.702309e+001	6.684389e+003
1.707077e+001	6.684391e+003
1.711845e+001	6.684394e+003
1.716614e+001	6.684395e+003
1.721382e+001	6.684397e+003
1.726151e+001	6.684400e+003
1.730919e+001	6.684402e+003
1.735687e+001	6.684404e+003
1.740456e+001	6.684407e+003
1.745224e+001	6.684408e+003
1.749992e+001	6.684411e+003
1.754761e+001	6.684413e+003
1.759529e+001	6.684415e+003
1.764297e+001	6.684418e+003
1.769066e+001	6.684420e+003
1.773834e+001	6.684422e+003
1.778603e+001	6.684424e+003
1.783371e+001	6.684426e+003
1.788139e+001	6.684428e+003
1.792908e+001	6.684431e+003
1.797676e+001	6.684433e+003
1.802445e+001	6.684435e+003
1.807213e+001	6.684438e+003
1.811981e+001	6.684440e+003
1.816750e+001	6.684442e+003
1.821518e+001	6.684444e+003
1.826286e+001	6.684446e+003
1.831055e+001	6.684448e+003
1.835823e+001	6.684451e+003
1.840591e+001	6.684453e+003
1.845360e+001	6.684455e+003
1.850128e+001	6.684458e+003
1.854896e+001	6.684460e+003
1.859665e+001	6.684462e+003
1.864433e+001	6.684464e+003
1.869202e+001	6.684467e+003
1.873970e+001	6.684469e+003
1.878738e+001	6.684471e+003
1.883507e+001	6.684474e+003
1.888275e+001	6.684475e+003
1.893044e+001	6.684478e+003
1.897812e+001	6.684480e+003
1.902580e+001	6.684482e+003
1.907349e+001	6.684485e+003
1.912117e+001	6.684487e+003
1.916885e+001	6.684489e+003
1.921654e+001	6.684491e+003
1.926422e+001	6.684494e+003
1.931190e+001	6.684496e+003
1.935959e+001	6.684498e+003
1.940727e+001	6.684501e+003
1.945496e+001	6.684503e+003
1.950264e+001	6.684505e+003
1.955032e+001	6.684508e+003
1.959801e+001	6.684510e+003
1.964569e+001	6.684512e+003
1.969338e+001	6.684515e+003
1.974106e+001	6.684517e+003
1.978874e+001	6.684519e+003
1.983643e+001	6.684522e+003
1.988411e+001	6.684524e+003
1.993179e+001	6.684526e+003
1.997948e+001	6.684528e+003
2.002716e+001	6.684531e+003
2.007484e+001	6.684533e+003
2.012253e+001	6.684535e+003
2.017021e+001	6.684538e+003
2.021789e+001	6.684540e+003
2.026558e+001	6.684542e+003
2.031326e+001	6.684545e+003
2.036095e+001	6.684547e+003
2.040863e+001	6.684549e+003
2.045631e+001	6.684552e+003
2.050400e+001	6.684554e+003
2.055168e+001	6.684556e+003
2.059937e+001	6.684558e+003
2.064705e+001	6.684561e+003
2.069473e+001	6.684563e+003
2.074242e+001	6.684566e+003
2.079010e+001	6.684568e+003
2.083778e+001	6.684571e+003
2.088547e+001	6.684573e+003
2.093315e+001	6.684575e+003
2.098084e+001	6.684578e+003
2.102852e+001	6.684580e+003
2.107620e+001	6.684582e+003
2.112389e+001	6.684585e+003
2.117157e+001	6.684587e+003
2.121925e+001	6.684589e+003
2.126694e+001	6.684592e+003
2.131462e+001	6.684595e+003
2.136230e+001	6.684597e+003
2.140999e+001	6.684599e+003
2.145767e+001	6.684602e+003
2.150536e+001	6.684604e+003
2.155304e+001	6.684606e+003
2.160072e+001	6.684609e+003
2.164841e+001	6.684611e+003
2.169609e+001	6.684613e+003
2.174377e+001	6.684616e+003
2.179146e+001	6.684619e+003
2.183914e+001	6.684621e+003
2.188683e+001	6.684623e+003
2.193451e+001	6.684626e+003
2.198219e+001	6.684628e+003
2.202988e+001	6.684630e+003
2.207756e+001	6.684633e+003
2.212524e+001	6.684636e+003
2.217293e+001	6.684638e+003
2.222061e+001	6.684640e+003
2.226829e+001	6.684642e+003
2.231598e+001	6.684645e+003
2.236366e+001	6.684647e+003
2.241135e+001	6.684650e+003
2.245903e+001	6.684652e+003
2.250671e+001	6.684655e+003
2.255440e+001	6.684657e+003
2.260208e+001	6.684659e+003
2.264977e+001	6.684662e+003
2.269745e+001	6.684665e+003
2.274513e+001	6.684667e+003
2.279282e+001	6.684669e+003
2.284050e+001	6.684672e+003
2.288818e+001	6.684675e+003
2.293587e+001	6.684677e+003
2.298355e+001	6.684679e+003
2.303123e+001	6.684682e+003
2.307892e+001	6.684684e+003
2.312660e+001	6.684687e+003
2.317429e+001	6.684689e+003
2.322197e+001	6.684692e+003
2.326965e+001	6.684694e+003
2.331734e+001	6.684697e+003
2.336502e+001	6.684699e+003
2.341271e+001	6.684702e+003
2.346039e+001	6.684704e+003
2.350807e+001	6.684706e+003
2.355576e+001	6.684709e+003
2.360344e+001	6.684712e+003
2.365112e+001	6.684714e+003
2.369881e+001	6.684717e+003
2.374649e+001	6.684719e+003
2.379417e+001	6.684722e+003
2.384186e+001	6.684724e+003
2.388954e+001	6.684727e+003
2.393722e+001	6.684730e+003
2.398491e+001	6.684732e+003
2.403259e+001	6.684734e+003
2.408028e+001	6.684737e+003
2.412796e+001	6.684740e+003
2.417564e+001	6.684742e+003
2.422333e+001	6.684745e+003
2.427101e+001	6.684747e+003
2.431870e+001	6.684750e+003
2.436638e+001	6.684753e+003
2.441406e+001	6.684755e+003
2.446175e+001	6.684757e+003
2.450943e+001	6.684760e+003
2.455711e+001	6.684763e+003
2.460480e+001	6.684765e+003
2.465248e+001	6.684767e+003
2.470016e+001	6.684770e+003
2.474785e+001	6.684773e+003
2.479553e+001	6.684775e+003
2.484322e+001	6.684778e+003
2.489090e+001	6.684780e+003
2.493858e+001	6.684783e+003
2.498627e+001	6.684786e+003
2.503395e+001	6.684788e+003
2.508163e+001	6.684791e+003
2.512932e+001	6.684793e+003
2.517700e+001	6.684796e+003
2.522469e+001	6.684799e+003
2.527237e+001	6.684801e+003
2.532005e+001	6.684803e+003
2.536774e+001	6.684807e+003
2.541542e+001	6.684809e+003
2.546310e+001	6.684812e+003
2.551079e+001	6.684814e+003
2.555847e+001	6.684817e+003
2.560616e+001	6.684820e+003
2.565384e+001	6.684822e+003
2.570152e+001	6.684825e+003
2.574921e+001	6.684827e+003
2.579689e+001	6.684830e+003
2.584457e+001	6.684833e+003
2.589226e+001	6.684835e+003
2.593994e+001	6.684838e+003
2.598763e+001	6.684840e+003
2.603531e+001	6.684844e+003
2.608299e+001	6.684846e+003
2.613068e+001	6.684848e+003
2.617836e+001	6.684851e+003
2.622604e+001	6.684854e+003
2.627373e+001	6.684857e+003
2.632141e+001	6.684859e+003
2.636910e+001	6.684862e+003
2.641678e+001	6.684864e+003
2.646446e+001	6.684867e+003
2.651215e+001	6.684870e+003
2.655983e+001	6.684873e+003
2.660751e+001	6.684875e+003
2.665520e+001	6.684877e+003
2.670288e+001	6.684880e+003
2.675056e+001	6.684883e+003
2.679825e+001	6.684886e+003
2.684593e+001	6.684888e+003
2.689362e+001	6.684891e+003
2.694130e+001	6.684894e+003
2.698898e+001	6.684897e+003
2.703667e+001	6.684899e+003
2.708435e+001	6.684902e+003
2.713204e+001	6.684904e+003
2.717972e+001	6.684907e+003
2.722740e+001	6.684911e+003
2.727509e+001	6.684913e+003
2.732277e+001	6.684916e+003
2.737045e+001	6.684918e+003
2.741814e+001	6.684921e+003
2.746582e+001	6.684924e+003
2.751350e+001	6.684927e+003
2.756119e+001	6.684929e+003
2.760887e+001	6.684932e+003
2.765655e+001	6.684934e+003
2.770424e+001	6.684938e+003
2.775192e+001	6.684941e+003
2.779961e+001	6.684943e+003
2.784729e+001	6.684946e+003
2.789497e+001	6.684948e+003
2.794266e+001	6.684951e+003
2.799034e+001	6.684954e+003
2.803803e+001	6.684957e+003
2.808571e+001	6.684960e+003
2.813339e+001	6.684962e+003
2.818108e+001	6.684965e+003
2.822876e+001	6.684968e+003
2.827644e+001	6.684971e+003
2.832413e+001	6.684974e+003
2.837181e+001	6.684976e+003
2.841949e+001	6.684979e+003
2.846718e+001	6.684981e+003
2.851486e+001	6.684984e+003
2.856254e+001	6.684988e+003
2.861023e+001	6.684990e+003
2.865791e+001	6.684993e+003
2.870560e+001	6.684996e+003
2.875328e+001	6.684998e+003
2.880096e+001	6.685001e+003
2.884865e+001	6.685005e+003
2.889633e+001	6.685007e+003
2.894402e+001	6.685010e+003
2.899170e+001	6.685013e+003
2.903938e+001	6.685015e+003
2.908707e+001	6.685018e+003
2.913475e+001	6.685021e+003
2.918243e+001	6.685024e+003
2.923012e+001	6.685027e+003
2.927780e+001	6.685030e+003
2.932548e+001	6.685032e+003
2.937317e+001	6.685035e+003
2.942085e+001	6.685038e+003
2.946854e+001	6.685041e+003
2.951622e+001	6.685044e+003
2.956390e+001	6.685047e+003
2.961159e+001	6.685050e+003
2.965927e+001	6.685052e+003
2.970696e+001	6.685055e+003
2.975464e+001	6.685058e+003
2.980232e+001	6.685061e+003
2.985001e+001	6.685064e+003
2.989769e+001	6.685067e+003
2.994537e+001	6.685070e+003
2.999306e+001	6.685072e+003
3.004074e+001	6.685075e+003
3.008842e+001	6.685078e+003
3.013611e+001	6.685082e+003
3.018379e+001	6.685084e+003
3.023148e+001	6.685087e+003
3.027916e+001	6.685090e+003
3.032684e+001	6.685093e+003
3.037453e+001	6.685096e+003
3.042221e+001	6.685099e+003
3.046989e+001	6.685102e+003
3.051758e+001	6.685105e+003
3.056526e+001	6.685108e+003
3.061295e+001	6.685111e+003
3.066063e+001	6.685113e+003
3.070831e+001	6.685116e+003
3.075600e+001	6.685119e+003
3.080368e+001	6.685122e+003
3.085136e+001	6.685125e+003
3.089905e+001	6.685128e+003
3.094673e+001	6.685131e+003
3.099442e+001	6.685134e+003
3.104210e+001	6.685137e+003
3.108978e+001	6.685140e+003
3.113747e+001	6.685143e+003
3.118515e+001	6.685146e+003
3.123283e+001	6.685149e+003
3.128052e+001	6.685152e+003
3.132820e+001	6.685155e+003
3.137588e+001	6.685158e+003
3.142357e+001	6.685161e+003
3.147125e+001	6.685164e+003
3.151894e+001	6.685167e+003
3.156662e+001	6.685169e+003
3.161430e+001	6.685172e+003
3.166199e+001	6.685176e+003
3.170967e+001	6.685179e+003
3.175736e+001	6.685182e+003
3.180504e+001	6.685185e+003
3.185272e+001	6.685188e+003
3.190041e+001	6.685191e+003
3.194809e+001	6.685194e+003
3.199577e+001	6.685197e+003
3.204346e+001	6.685200e+003
3.209114e+001	6.685203e+003
3.213882e+001	6.685206e+003
3.218651e+001	6.685209e+003
3.223419e+001	6.685212e+003
3.228187e+001	6.685215e+003
3.232956e+001	6.685218e+003
3.237724e+001	6.685221e+003
3.242493e+001	6.685224e+003
3.247261e+001	6.685227e+003
3.252029e+001	6.685230e+003
3.256798e+001	6.685233e+003
3.261566e+001	6.685236e+003
3.266335e+001	6.685239e+003
3.271103e+001	6.685243e+003
3.275871e+001	6.685246e+003
3.280640e+001	6.685249e+003
3.285408e+001	6.685252e+003
3.290177e+001	6.685255e+003
3.294945e+001	6.685258e+003
3.299713e+001	6.685261e+003
3.304482e+001	6.685264e+003
3.309250e+001	6.685267e+003
3.314018e+001	6.685270e+003
3.318787e+001	6.685273e+003
3.323555e+001	6.685276e+003
3.328323e+001	6.685280e+003
3.333092e+001	6.685283e+003
3.337860e+001	6.685286e+003
3.342629e+001	6.685289e+003
3.347397e+001	6.685293e+003
3.352165e+001	6.685296e+003
3.356934e+001	6.685299e+003
3.361702e+001	6.685302e+003
3.366470e+001	6.685305e+003
3.371239e+001	6.685308e+003
3.376007e+001	6.685311e+003
3.380775e+001	6.685314e+003
3.385544e+001	6.685317e+003
3.390312e+001	6.685320e+003
3.395080e+001	6.685323e+003
3.399849e+001	6.685327e+003
3.404617e+001	6.685330e+003
3.409386e+001	6.685333e+003
3.414154e+001	6.685337e+003
3.418922e+001	6.685340e+003
3.423691e+001	6.685343e+003
3.428459e+001	6.685346e+003
3.433227e+001	6.685349e+003
3.437996e+001	6.685353e+003
3.442764e+001	6.685356e+003
3.447533e+001	6.685359e+003
3.452301e+001	6.685362e+003
3.457070e+001	6.685365e+003
3.461838e+001	6.685368e+003
3.466606e+001	6.685372e+003
3.471375e+001	6.685375e+003
3.476143e+001	6.685378e+003
3.480911e+001	6.685381e+003
3.485680e+001	6.685384e+003
3.490448e+001	6.685388e+003
3.495216e+001	6.685391e+003
3.499985e+001	6.685394e+003
3.504753e+001	6.685397e+003
3.509521e+001	6.685400e+003
3.514290e+001	6.685404e+003
3.519058e+001	6.685407e+003
3.523827e+001	6.685411e+003
3.528595e+001	6.685414e+003
3.533363e+001	6.685417e+003
3.538132e+001	6.685421e+003
3.542900e+001	6.685424e+003
3.547668e+001	6.685427e+003
3.552437e+001	6.685431e+003
3.557205e+001	6.685434e+003
3.561973e+001	6.685437e+003
3.566742e+001	6.685440e+003
3.571510e+001	6.685444e+003
3.576279e+001	6.685447e+003
3.581047e+001	6.685450e+003
3.585816e+001	6.685454e+003
3.590584e+001	6.685457e+003
3.595352e+001	6.685460e+003
3.600121e+001	6.685463e+003
3.604889e+001	6.685467e+003
3.609657e+001	6.685470e+003
3.614426e+001	6.685473e+003
3.619194e+001	6.685477e+003
3.623963e+001	6.685480e+003
3.628731e+001	6.685483e+003
3.633499e+001	6.685487e+003
3.638268e+001	6.685490e+003
3.643036e+001	6.685493e+003
3.647804e+001	6.685497e+003
3.652573e+001	6.685500e+003
3.657341e+001	6.685504e+003
3.662109e+001	6.685507e+003
3.666878e+001	6.685510e+003
3.671646e+001	6.685514e+003
3.676414e+001	6.685517e+003
3.681183e+001	6.685521e+003
3.685951e+001	6.685524e+003
3.690720e+001	6.685527e+003
3.695488e+001	6.685531e+003
3.700256e+001	6.685534e+003
3.705025e+001	6.685538e+003
3.709793e+001	6.685541e+003
3.714561e+001	6.685544e+003
3.719330e+001	6.685548e+003
3.724098e+001	6.685551e+003
3.728866e+001	6.685555e+003
3.733635e+001	6.685558e+003
3.738403e+001	6.685562e+003
3.743172e+001	6.685565e+003
3.747940e+001	6.685568e+003
3.752709e+001	6.685572e+003
3.757477e+001	6.685575e+003
3.762245e+001	6.685578e+003
3.767014e+001	6.685582e+003
3.771782e+001	6.685585e+003
3.776550e+001	6.685588e+003
3.781319e+001	6.685592e+003
3.786087e+001	6.685595e+003
3.790855e+001	6.685599e+003
3.795624e+001	6.685603e+003
3.800392e+001	6.685606e+003
3.805161e+001	6.685610e+003
3.809929e+001	6.685613e+003
3.814697e+001	6.685617e+003
3.819466e+001	6.685620e+003
3.824234e+001	6.685624e+003
3.829002e+001	6.685627e+003
3.833771e+001	6.685631e+003
3.838539e+001	6.685634e+003
3.843307e+001	6.685638e+003
3.848076e+001	6.685642e+003
3.852844e+001	6.685645e+003
3.857612e+001	6.685649e+003
3.862381e+001	6.685652e+003
3.867149e+001	6.685655e+003
3.871918e+001	6.685659e+003
3.876686e+001	6.685662e+003
3.881454e+001	6.685666e+003
3.886223e+001	6.685669e+003
3.890991e+001	6.685673e+003
3.895760e+001	6.685677e+003
3.900528e+001	6.685680e+003
3.905296e+001	6.685684e+003
3.910065e+001	6.685688e+003
3.914833e+001	6.685691e+003
3.919602e+001	6.685695e+003
3.924370e+001	6.685699e+003
3.929138e+001	6.685702e+003
3.933907e+001	6.685706e+003
3.938675e+001	6.685709e+003
3.943443e+001	6.685712e+003
3.948212e+001	6.685716e+003
3.952980e+001	6.685720e+003
3.957748e+001	6.685723e+003
3.962517e+001	6.685727e+003
3.967285e+001	6.685731e+003
3.972054e+001	6.685734e+003
3.976822e+001	6.685738e+003
3.981590e+001	6.685742e+003
3.986359e+001	6.685746e+003
3.991127e+001	6.685749e+003
3.995895e+001	6.685753e+003
4.000664e+001	6.685756e+003
4.005432e+001	6.685760e+003
4.010200e+001	6.685763e+003
4.014969e+001	6.685767e+003
4.019737e+001	6.685771e+003
4.024505e+001	6.685775e+003
4.029274e+001	6.685778e+003
4.034042e+001	6.685782e+003
4.038811e+001	6.685786e+003
4.043579e+001	6.685790e+003
4.048348e+001	6.685793e+003
4.053116e+001	6.685796e+003
4.057884e+001	6.685800e+003
4.062653e+001	6.685804e+003
4.067421e+001	6.685808e+003
4.072189e+001	6.685812e+003
4.076958e+001	6.685816e+003
4.081726e+001	6.685819e+003
4.086495e+001	6.685823e+003
4.091263e+001	6.685827e+003
4.096031e+001	6.685830e+003
4.100800e+001	6.685834e+003
4.105568e+001	6.685838e+003
4.110336e+001	6.685842e+003
4.115105e+001	6.685846e+003
4.119873e+001	6.685849e+003
4.124641e+001	6.685853e+003
4.129410e+001	6.685857e+003
4.134178e+001	6.685860e+003
4.138946e+001	6.685864e+003
4.143715e+001	6.685868e+003
4.148483e+001	6.685872e+003
4.153252e+001	6.685876e+003
4.158020e+001	6.685880e+003
4.162788e+001	6.685884e+003
4.167557e+001	6.685887e+003
4.172325e+001	6.685891e+003
4.177093e+001	6.685895e+003
4.181862e+001	6.685899e+003
4.186630e+001	6.685903e+003
4.191398e+001	6.685907e+003
4.196167e+001	6.685910e+003
4.200936e+001	6.685914e+003
4.205704e+001	6.685917e+003
4.210472e+001	6.685921e+003
4.215241e+001	6.685926e+003
4.220009e+001	6.685930e+003
4.224777e+001	6.685934e+003
4.229546e+001	6.685937e+003
4.234314e+001	6.685941e+003
4.239082e+001	6.685945e+003
4.243851e+001	6.685949e+003
4.248619e+001	6.685953e+003
4.253388e+001	6.685957e+003
4.258156e+001	6.685961e+003
4.262924e+001	6.685964e+003
4.267693e+001	6.685968e+003
4.272461e+001	6.685972e+003
4.277229e+001	6.685976e+003
4.281998e+001	6.685980e+003
4.286766e+001	6.685984e+003
4.291534e+001	6.685988e+003
4.296303e+001	6.685992e+003
4.301071e+001	6.685996e+003
4.305839e+001	6.686000e+003
4.310608e+001	6.686004e+003
4.315376e+001	6.686008e+003
4.320145e+001	6.686011e+003
4.324913e+001	6.686015e+003
4.329681e+001	6.686020e+003
4.334450e+001	6.686024e+003
4.339218e+001	6.686028e+003
4.343986e+001	6.686031e+003
4.348755e+001	6.686035e+003
4.353523e+001	6.686039e+003
4.358292e+001	6.686044e+003
4.363060e+001	6.686048e+003
4.367829e+001	6.686051e+003
4.372597e+001	6.686055e+003
4.377365e+001	6.686059e+003
4.382134e+001	6.686064e+003
4.386902e+001	6.686068e+003
4.391670e+001	6.686071e+003
4.396439e+001	6.686075e+003
4.401207e+001	6.686080e+003
4.405975e+001	6.686084e+003
4.410744e+001	6.686088e+003
4.415512e+001	6.686092e+003
4.420280e+001	6.686096e+003
4.425049e+001	6.686100e+003
4.429817e+001	6.686104e+003
4.434586e+001	6.686108e+003
4.439354e+001	6.686112e+003
4.444122e+001	6.686116e+003
4.448891e+001	6.686120e+003
4.453659e+001	6.686125e+003
4.458427e+001	6.686128e+003
4.463196e+001	6.686132e+003
4.467964e+001	6.686137e+003
4.472732e+001	6.686141e+003
4.477501e+001	6.686145e+003
4.482269e+001	6.686149e+003
4.487038e+001	6.686153e+003
4.491806e+001	6.686158e+003
4.496574e+001	6.686162e+003
4.501343e+001	6.686165e+003
4.506111e+001	6.686170e+003
4.510880e+001	6.686174e+003
4.515648e+001	6.686179e+003
4.520416e+001	6.686182e+003
4.525185e+001	6.686186e+003
4.529953e+001	6.686191e+003
4.534721e+001	6.686195e+003
4.539490e+001	6.686199e+003
4.544258e+001	6.686203e+003
4.549027e+001	6.686208e+003
4.553795e+001	6.686212e+003
4.558563e+001	6.686216e+003
4.563332e+001	6.686220e+003
4.568100e+001	6.686224e+003
4.572868e+001	6.686229e+003
4.577637e+001	6.686232e+003
4.582405e+001	6.686237e+003
4.587173e+001	6.686241e+003
4.591942e+001	6.686246e+003
4.596710e+001	6.686249e+003
4.601479e+001	6.686254e+003
4.606247e+001	6.686259e+003
4.611015e+001	6.686263e+003
4.615784e+001	6.686267e+003
4.620552e+001	6.686271e+003
4.625320e+001	6.686276e+003
4.630089e+001	6.686279e+003
4.634857e+001	6.686284e+003
4.639625e+001	6.686288e+003
4.644394e+001	6.686293e+003
4.649162e+001	6.686297e+003
4.653930e+001	6.686301e+003
4.658699e+001	6.686306e+003
4.663468e+001	6.686310e+003
4.668236e+001	6.686314e+003
4.673004e+001	6.686319e+003
4.677773e+001	6.686323e+003
4.682541e+001	6.686327e+003
4.687309e+001	6.686332e+003
4.692078e+001	6.686336e+003
4.696846e+001	6.686340e+003
4.701614e+001	6.686345e+003
4.706383e+001	6.686349e+003
4.711151e+001	6.686353e+003
4.715920e+001	6.686358e+003
4.720688e+001	6.686362e+003
4.725456e+001	6.686367e+003
4.730225e+001	6.686371e+003
4.734993e+001	6.686376e+003
4.739761e+001	6.686380e+003
4.744530e+001	6.686384e+003
4.749298e+001	6.686389e+003
4.754066e+001	6.686394e+003
4.758835e+001	6.686397e+003
4.763603e+001	6.686402e+003
4.768371e+001	6.686407e+003
4.773140e+001	6.686411e+003
4.777908e+001	6.686415e+003
4.782677e+001	6.686420e+003
4.787445e+001	6.686424e+003
4.792213e+001	6.686429e+003
4.796982e+001	6.686434e+003
4.801750e+001	6.686437e+003
4.806519e+001	6.686442e+003
4.811287e+001	6.686447e+003
4.816055e+001	6.686451e+003
4.820824e+001	6.686456e+003
4.825592e+001	6.686461e+003
4.830361e+001	6.686465e+003
4.835129e+001	6.686469e+003
4.839897e+001	6.686474e+003
4.844666e+001	6.686478e+003
4.849434e+001	6.686483e+003
4.854202e+001	6.686487e+003
4.858971e+001	6.686492e+003
4.863739e+001	6.686497e+003
4.868507e+001	6.686501e+003
4.873276e+001	6.686506e+003
4.878044e+001	6.686511e+003
4.882813e+001	6.686515e+003
4.887581e+001	6.686519e+003
4.892349e+001	6.686524e+003
4.897118e+001	6.686528e+003
4.901886e+001	6.686533e+003
4.906654e+001	6.686538e+003
4.911423e+001	6.686542e+003
4.916191e+001	6.686547e+003
4.920959e+001	6.686551e+003
4.925728e+001	6.686556e+003
4.930496e+001	6.686561e+003
4.935264e+001	6.686565e+003
4.940033e+001	6.686571e+003
4.944801e+001	6.686575e+003
4.949570e+001	6.686580e+003
4.954338e+001	6.686585e+003
4.959106e+001	6.686589e+003
4.963875e+001	6.686594e+003
4.968643e+001	6.686598e+003
4.973412e+001	6.686603e+003
4.978180e+001	6.686608e+003
4.982948e+001	6.686612e+003
4.987717e+001	6.686617e+003
4.992485e+001	6.686622e+003
4.997254e+001	6.686627e+003
5.002022e+001	6.686632e+003
5.006790e+001	6.686636e+003
5.011559e+001	6.686641e+003
5.016327e+001	6.686645e+003
5.021095e+001	6.686650e+003
5.025864e+001	6.686655e+003
5.030632e+001	6.686660e+003
5.035400e+001	6.686665e+003
5.040169e+001	6.686669e+003
5.044937e+001	6.686674e+003
5.049705e+001	6.686679e+003
5.054474e+001	6.686684e+003
5.059242e+001	6.686689e+003
5.064011e+001	6.686693e+003
5.068779e+001	6.686699e+003
5.073547e+001	6.686703e+003
5.078316e+001	6.686708e+003
5.083084e+001	6.686712e+003
5.087852e+001	6.686718e+003
5.092621e+001	6.686722e+003
5.097389e+001	6.686727e+003
5.102157e+001	6.686732e+003
5.106926e+001	6.686737e+003
5.111695e+001	6.686742e+003
5.116463e+001	6.686746e+003
5.121231e+001	6.686752e+003
5.126000e+001	6.686756e+003
5.130768e+001	6.686762e+003
5.135536e+001	6.686766e+003
5.140305e+001	6.686771e+003
5.145073e+001	6.686776e+003
5.149841e+001	6.686781e+003
5.154610e+001	6.686786e+003
5.159378e+001	6.686791e+003
5.164146e+001	6.686796e+003
5.168915e+001	6.686801e+003
5.173683e+001	6.686806e+003
5.178452e+001	6.686811e+003
5.183220e+001	6.686816e+003
5.187988e+001	6.686820e+003
5.192757e+001	6.686826e+003
5.197525e+001	6.686830e+003
5.202293e+001	6.686836e+003
5.207062e+001	6.686840e+003
5.211830e+001	6.686846e+003
5.216598e+001	6.686850e+003
5.221367e+001	6.686856e+003
5.226135e+001	6.686860e+003
5.230904e+001	6.686866e+003
5.235672e+001	6.686870e+003
5.240440e+001	6.686876e+003
5.245209e+001	6.686881e+003
5.249977e+001	6.686886e+003
5.254745e+001	6.686891e+003
5.259514e+001	6.686896e+003
5.264282e+001	6.686901e+003
5.269051e+001	6.686907e+003
5.273819e+001	6.686911e+003
5.278588e+001	6.686917e+003
5.283356e+001	6.686921e+003
5.288124e+001	6.686927e+003
5.292893e+001	6.686932e+003
5.297661e+001	6.686937e+003
5.302429e+001	6.686942e+003
5.307198e+001	6.686947e+003
5.311966e+001	6.686952e+003
5.316734e+001	6.686957e+003
5.321503e+001	6.686963e+003
5.326271e+001	6.686967e+003
5.331039e+001	6.686973e+003
5.335808e+001	6.686978e+003
5.340576e+001	6.686984e+003
5.345345e+001	6.686988e+003
5.350113e+001	6.686994e+003
5.354881e+001	6.686999e+003
5.359650e+001	6.687004e+003
5.364418e+001	6.687009e+003
5.369186e+001	6.687014e+003
5.373955e+001	6.687020e+003
5.378723e+001	6.687025e+003
5.383491e+001	6.687031e+003
5.388260e+001	6.687035e+003
5.393028e+001	6.687041e+003
5.397796e+001	6.687046e+003
5.402565e+001	6.687051e+003
5.407333e+001	6.687057e+003
5.412102e+001	6.687062e+003
5.416870e+001	6.687068e+003
5.421639e+001	6.687072e+003
5.426407e+001	6.687078e+003
5.431175e+001	6.687083e+003
5.435944e+001	6.687088e+003
5.440712e+001	6.687094e+003
5.445480e+001	6.687099e+003
5.450249e+001	6.687105e+003
5.455017e+001	6.687110e+003
5.459786e+001	6.687115e+003
5.464554e+001	6.687121e+003
5.469322e+001	6.687126e+003
5.474091e+001	6.687132e+003
5.478859e+001	6.687137e+003
5.483627e+001	6.687142e+003
5.488396e+001	6.687148e+003
5.493164e+001	6.687153e+003
5.497932e+001	6.687158e+003
5.502701e+001	6.687164e+003
5.507469e+001	6.687169e+003
5.512237e+001	6.687175e+003
5.517006e+001	6.687180e+003
5.521774e+001	6.687185e+003
5.526543e+001	6.687191e+003
5.531311e+001	6.687196e+003
5.536079e+001	6.687202e+003
5.540848e+001	6.687208e+003
5.545616e+001	6.687213e+003
5.550384e+001	6.687219e+003
5.555153e+001	6.687224e+003
5.559921e+001	6.687229e+003
5.564689e+001	6.687235e+003
5.569458e+001	6.687240e+003
5.574227e+001	6.687246e+003
5.578995e+001	6.687252e+003
5.583763e+001	6.687257e+003
5.588532e+001	6.687262e+003
5.593300e+001	6.687268e+003
5.598068e+001	6.687274e+003
5.602837e+001	6.687279e+003
5.607605e+001	6.687285e+003
5.612373e+001	6.687290e+003
5.617142e+001	6.687296e+003
5.621910e+001	6.687302e+003
5.626679e+001	6.687307e+003
5.631447e+001	6.687313e+003
5.636215e+001	6.687319e+003
5.640984e+001	6.687324e+003
5.645752e+001	6.687330e+003
5.650520e+001	6.687336e+003
5.655289e+001	6.687341e+003
5.660057e+001	6.687347e+003
5.664825e+001	6.687353e+003
5.669594e+001	6.687358e+003
5.674362e+001	6.687364e+003
5.679130e+001	6.687370e+003
5.683899e+001	6.687376e+003
5.688667e+001	6.687381e+003
5.693436e+001	6.687387e+003
5.698204e+001	6.687393e+003
5.702972e+001	6.687398e+003
5.707741e+001	6.687404e+003
5.712509e+001	6.687410e+003
5.717277e+001	6.687416e+003
5.722046e+001	6.687421e+003
5.726814e+001	6.687427e+003
5.731583e+001	6.687433e+003
5.736351e+001	6.687439e+003
5.741120e+001	6.687444e+003
5.745888e+001	6.687450e+003
5.750656e+001	6.687456e+003
5.755425e+001	6.687462e+003
5.760193e+001	6.687468e+003
5.764961e+001	6.687474e+003
5.769730e+001	6.687480e+003
5.774498e+001	6.687485e+003
5.779266e+001	6.687491e+003
5.784035e+001	6.687497e+003
5.788803e+001	6.687503e+003
5.793571e+001	6.687509e+003
5.798340e+001	6.687515e+003
5.803108e+001	6.687521e+003
5.807877e+001	6.687527e+003
5.812645e+001	6.687533e+003
5.817413e+001	6.687538e+003
5.822182e+001	6.687544e+003
5.826950e+001	6.687551e+003
5.831718e+001	6.687557e+003
5.836487e+001	6.687562e+003
5.841255e+001	6.687568e+003
5.846023e+001	6.687574e+003
5.850792e+001	6.687581e+003
5.855560e+001	6.687586e+003
5.860329e+001	6.687592e+003
5.865097e+001	6.687598e+003
5.869865e+001	6.687605e+003
5.874634e+001	6.687611e+003
5.879402e+001	6.687616e+003
5.884171e+001	6.687622e+003
5.888939e+001	6.687628e+003
5.893707e+001	6.687635e+003
5.898476e+001	6.687641e+003
5.903244e+001	6.687647e+003
5.908013e+001	6.687653e+003
5.912781e+001	6.687659e+003
5.917549e+001	6.687665e+003
5.922318e+001	6.687672e+003
5.927086e+001	6.687677e+003
5.931854e+001	6.687683e+003
5.936623e+001	6.687689e+003
5.941391e+001	6.687695e+003
5.946159e+001	6.687702e+003
5.950928e+001	6.687708e+003
5.955696e+001	6.687714e+003
5.960464e+001	6.687720e+003
5.965233e+001	6.687727e+003
5.970001e+001	6.687733e+003
5.974770e+001	6.687739e+003
5.979538e+001	6.687746e+003
5.984306e+001	6.687752e+003
5.989075e+001	6.687758e+003
5.993843e+001	6.687764e+003
5.998611e+001	6.687770e+003
6.003380e+001	6.687776e+003
6.008148e+001	6.687782e+003
6.012916e+001	6.687789e+003
6.017685e+001	6.687796e+003
6.022453e+001	6.687802e+003
6.027222e+001	6.687808e+003
6.031990e+001	6.687814e+003
6.036759e+001	6.687820e+003
6.041527e+001	6.687827e+003
6.046295e+001	6.687833e+003
6.051064e+001	6.687839e+003
6.055832e+001	6.687846e+003
6.060600e+001	6.687853e+003
6.065369e+001	6.687859e+003
6.070137e+001	6.687865e+003
6.074905e+001	6.687872e+003
6.079674e+001	6.687878e+003
6.084442e+001	6.687884e+003
6.089211e+001	6.687891e+003
6.093979e+001	6.687897e+003
6.098747e+001	6.687903e+003
6.103516e+001	6.687910e+003
6.108284e+001	6.687917e+003
6.113052e+001	6.687923e+003
6.117821e+001	6.687930e+003
6.122589e+001	6.687936e+003
6.127357e+001	6.687943e+003
6.132126e+001	6.687949e+003
6.136894e+001	6.687956e+003
6.141663e+001	6.687962e+003
6.146431e+001	6.687969e+003
6.151199e+001	6.687975e+003
6.155968e+001	6.687982e+003
6.160736e+001	6.687988e+003
6.165504e+001	6.687995e+003
6.170273e+001	6.688001e+003
6.175041e+001	6.688008e+003
6.179809e+001	6.688014e+003
6.184578e+001	6.688021e+003
6.189346e+001	6.688027e+003
6.194115e+001	6.688034e+003
6.198883e+001	6.688041e+003
6.203652e+001	6.688047e+003
6.208420e+001	6.688054e+003
6.213188e+001	6.688061e+003
6.217957e+001	6.688068e+003
6.222725e+001	6.688074e+003
6.227493e+001	6.688081e+003
6.232262e+001	6.688088e+003
6.237030e+001	6.688094e+003
6.241798e+001	6.688101e+003
6.246567e+001	6.688108e+003
6.251335e+001	6.688115e+003
6.256104e+001	6.688121e+003
6.260872e+001	6.688128e+003
6.265640e+001	6.688135e+003
6.270409e+001	6.688141e+003
6.275177e+001	6.688148e+003
6.279945e+001	6.688155e+003
6.284714e+001	6.688162e+003
6.289482e+001	6.688169e+003
6.294250e+001	6.688176e+003
6.299019e+001	6.688183e+003
6.303787e+001	6.688189e+003
6.308555e+001	6.688196e+003
6.313324e+001	6.688203e+003
6.318092e+001	6.688210e+003
6.322861e+001	6.688217e+003
6.327629e+001	6.688224e+003
6.332398e+001	6.688231e+003
6.337166e+001	6.688238e+003
6.341934e+001	6.688245e+003
6.346703e+001	6.688252e+003
6.351471e+001	6.688259e+003
6.356239e+001	6.688266e+003
6.361008e+001	6.688272e+003
6.365776e+001	6.688279e+003
6.370545e+001	6.688286e+003
6.375313e+001	6.688293e+003
6.380081e+001	6.688300e+003
6.384850e+001	6.688308e+003
6.389618e+001	6.688315e+003
6.394386e+001	6.688322e+003
6.399155e+001	6.688329e+003
6.403923e+001	6.688336e+003
6.408691e+001	6.688343e+003
6.413460e+001	6.688350e+003
6.418228e+001	6.688357e+003
6.422996e+001	6.688364e+003
6.427765e+001	6.688371e+003
6.432533e+001	6.688379e+003
6.437302e+001	6.688386e+003
6.442070e+001	6.688393e+003
6.446838e+001	6.688400e+003
6.451607e+001	6.688407e+003
6.456375e+001	6.688414e+003
6.461143e+001	6.688421e+003
6.465912e+001	6.688429e+003
6.470680e+001	6.688436e+003
6.475448e+001	6.688443e+003
6.480217e+001	6.688450e+003
6.484985e+001	6.688457e+003
6.489754e+001	6.688465e+003
6.494522e+001	6.688472e+003
6.499291e+001	6.688479e+003
6.504059e+001	6.688487e+003
6.508827e+001	6.688494e+003
6.513596e+001	6.688501e+003
6.518364e+001	6.688508e+003
6.523132e+001	6.688516e+003
6.527901e+001	6.688523e+003
6.532669e+001	6.688531e+003
6.537438e+001	6.688537e+003
6.542206e+001	6.688545e+003
6.546974e+001	6.688553e+003
6.551743e+001	6.688560e+003
6.556511e+001	6.688567e+003
6.561280e+001	6.688574e+003
6.566048e+001	6.688582e+003
6.570816e+001	6.688590e+003
6.575584e+001	6.688597e+003
6.580353e+001	6.688604e+003
6.585121e+001	6.688612e+003
6.589890e+001	6.688620e+003
6.594658e+001	6.688627e+003
6.599427e+001	6.688635e+003
6.604195e+001	6.688642e+003
6.608963e+001	6.688650e+003
6.613731e+001	6.688657e+003
6.618500e+001	6.688665e+003
6.623268e+001	6.688672e+003
6.628037e+001	6.688680e+003
6.632805e+001	6.688688e+003
6.637573e+001	6.688695e+003
6.642341e+001	6.688702e+003
6.647110e+001	6.688710e+003
6.651878e+001	6.688718e+003
6.656647e+001	6.688725e+003
6.661415e+001	6.688733e+003
6.666184e+001	6.688741e+003
6.670952e+001	6.688749e+003
6.675720e+001	6.688756e+003
6.680488e+001	6.688764e+003
6.685257e+001	6.688772e+003
6.690025e+001	6.688779e+003
6.694794e+001	6.688787e+003
6.699562e+001	6.688795e+003
6.704330e+001	6.688802e+003
6.709098e+001	6.688810e+003
6.713867e+001	6.688818e+003
6.718636e+001	6.688826e+003
6.723404e+001	6.688833e+003
6.728173e+001	6.688842e+003
6.732941e+001	6.688849e+003
6.737709e+001	6.688857e+003
6.742477e+001	6.688865e+003
6.747246e+001	6.688873e+003
6.752014e+001	6.688880e+003
6.756783e+001	6.688889e+003
6.761551e+001	6.688896e+003
6.766320e+001	6.688904e+003
6.771088e+001	6.688912e+003
6.775856e+001	6.688920e+003
6.780624e+001	6.688928e+003
6.785393e+001	6.688936e+003
6.790161e+001	6.688944e+003
6.794930e+001	6.688952e+003
6.799698e+001	6.688960e+003
6.804466e+001	6.688968e+003
6.809234e+001	6.688976e+003
6.814003e+001	6.688984e+003
6.818771e+001	6.688992e+003
6.823540e+001	6.689000e+003
6.828308e+001	6.689008e+003
6.833077e+001	6.689017e+003
6.837845e+001	6.689024e+003
6.842613e+001	6.689033e+003
6.847381e+001	6.689041e+003
6.852150e+001	6.689049e+003
6.856918e+001	6.689057e+003
6.861687e+001	6.689065e+003
6.866455e+001	6.689073e+003
6.871223e+001	6.689081e+003
6.875992e+001	6.689090e+003
6.880760e+001	6.689098e+003
6.885529e+001	6.689106e+003
6.890297e+001	6.689114e+003
6.895066e+001	6.689122e+003
6.899834e+001	6.689131e+003
6.904602e+001	6.689139e+003
6.909370e+001	6.689148e+003
6.914139e+001	6.689155e+003
6.918907e+001	6.689164e+003
6.923676e+001	6.689172e+003
6.928444e+001	6.689181e+003
6.933213e+001	6.689189e+003
6.937980e+001	6.689197e+003
6.942749e+001	6.689205e+003
6.947517e+001	6.689214e+003
6.952286e+001	6.689222e+003
6.957054e+001	6.689231e+003
6.961823e+001	6.689239e+003
6.966591e+001	6.689248e+003
6.971359e+001	6.689256e+003
6.976127e+001	6.689265e+003
6.980896e+001	6.689273e+003
6.985664e+001	6.689282e+003
6.990433e+001	6.689290e+003
6.995201e+001	6.689299e+003
6.999970e+001	6.689307e+003
7.004738e+001	6.689316e+003
7.009506e+001	6.689324e+003
7.014274e+001	6.689332e+003
7.019043e+001	6.689341e+003
7.023812e+001	6.689350e+003
7.028580e+001	6.689359e+003
7.033348e+001	6.689367e+003
7.038116e+001	6.689376e+003
7.042885e+001	6.689384e+003
7.047653e+001	6.689393e+003
7.052422e+001	6.689402e+003
7.057190e+001	6.689410e+003
7.061959e+001	6.689419e+003
7.066727e+001	6.689428e+003
7.071495e+001	6.689436e+003
7.076263e+001	6.689445e+003
7.081032e+001	6.689454e+003
7.085800e+001	6.689463e+003
7.090569e+001	6.689471e+003
7.095337e+001	6.689480e+003
7.100105e+001	6.689489e+003
7.104873e+001	6.689498e+003
7.109642e+001	6.689507e+003
7.114410e+001	6.689516e+003
7.119179e+001	6.689524e+003
7.123947e+001	6.689534e+003
7.128716e+001	6.689542e+003
7.133484e+001	6.689551e+003
7.138252e+001	6.689560e+003
7.143020e+001	6.689569e+003
7.147789e+001	6.689578e+003
7.152557e+001	6.689587e+003
7.157326e+001	6.689596e+003
7.162094e+001	6.689605e+003
7.166863e+001	6.689614e+003
7.171631e+001	6.689623e+003
7.176399e+001	6.689632e+003
7.181168e+001	6.689641e+003
7.185936e+001	6.689650e+003
7.190705e+001	6.689659e+003
7.195473e+001	6.689668e+003
7.200241e+001	6.689678e+003
7.205009e+001	6.689687e+003
7.209778e+001	6.689695e+003
7.214546e+001	6.689705e+003
7.219315e+001	6.689714e+003
7.224083e+001	6.689723e+003
7.228852e+001	6.689732e+003
7.233620e+001	6.689742e+003
7.238388e+001	6.689751e+003
7.243156e+001	6.689760e+003
7.247925e+001	6.689769e+003
7.252693e+001	6.689779e+003
7.257462e+001	6.689788e+003
7.262230e+001	6.689797e+003
7.266998e+001	6.689806e+003
7.271766e+001	6.689815e+003
7.276535e+001	6.689825e+003
7.281303e+001	6.689835e+003
7.286072e+001	6.689844e+003
7.290840e+001	6.689853e+003
7.295609e+001	6.689862e+003
7.300377e+001	6.689872e+003
7.305145e+001	6.689882e+003
7.309913e+001	6.689891e+003
7.314682e+001	6.689900e+003
7.319450e+001	6.689909e+003
7.324219e+001	6.689919e+003
7.328987e+001	6.689929e+003
7.333755e+001	6.689938e+003
7.338524e+001	6.689948e+003
7.343292e+001	6.689957e+003
7.348061e+001	6.689967e+003
7.352829e+001	6.689977e+003
7.357598e+001	6.689987e+003
7.362366e+001	6.689996e+003
7.367134e+001	6.690006e+003
7.371902e+001	6.690015e+003
7.376671e+001	6.690025e+003
7.381439e+001	6.690034e+003
7.386208e+001	6.690044e+003
7.390976e+001	6.690054e+003
7.395745e+001	6.690064e+003
7.400513e+001	6.690074e+003
7.405281e+001	6.690083e+003
7.410049e+001	6.690093e+003
7.414818e+001	6.690103e+003
7.419586e+001	6.690112e+003
7.424355e+001	6.690122e+003
7.429123e+001	6.690132e+003
7.433891e+001	6.690142e+003
7.438659e+001	6.690152e+003
7.443428e+001	6.690161e+003
7.448196e+001	6.690171e+003
7.452965e+001	6.690181e+003
7.457733e+001	6.690191e+003
7.462502e+001	6.690201e+003
7.467270e+001	6.690211e+003
7.472038e+001	6.690221e+003
7.476806e+001	6.690231e+003
7.481575e+001	6.690242e+003
7.486344e+001	6.690252e+003
7.491112e+001	6.690262e+003
7.495880e+001	6.690272e+003
7.500648e+001	6.690282e+003
7.505417e+001	6.690292e+003
7.510185e+001	6.690302e+003
7.514954e+001	6.690312e+003
7.519722e+001	6.690322e+003
7.524491e+001	6.690332e+003
7.529259e+001	6.690342e+003
7.534027e+001	6.690352e+003
7.538795e+001	6.690363e+003
7.543564e+001	6.690373e+003
7.548332e+001	6.690383e+003
7.553101e+001	6.690393e+003
7.557869e+001	6.690404e+003
7.562637e+001	6.690414e+003
7.567405e+001	6.690425e+003
7.572174e+001	6.690435e+003
7.576942e+001	6.690445e+003
7.581711e+001	6.690456e+003
7.586479e+001	6.690466e+003
7.591248e+001	6.690476e+003
7.596016e+001	6.690486e+003
7.600784e+001	6.690497e+003
7.605552e+001	6.690507e+003
7.610321e+001	6.690518e+003
7.615089e+001	6.690529e+003
7.619858e+001	6.690539e+003
7.624626e+001	6.690550e+003
7.629395e+001	6.690560e+003
7.634163e+001	6.690570e+003
7.638931e+001	6.690581e+003
7.643700e+001	6.690592e+003
7.648468e+001	6.690603e+003
7.653237e+001	6.690613e+003
7.658005e+001	6.690624e+003
7.662773e+001	6.690634e+003
7.667541e+001	6.690645e+003
7.672310e+001	6.690656e+003
7.677078e+001	6.690667e+003
7.681847e+001	6.690678e+003
7.686615e+001	6.690688e+003
7.691384e+001	6.690699e+003
7.696152e+001	6.690710e+003
7.700920e+001	6.690721e+003
7.705688e+001	6.690731e+003
7.710457e+001	6.690742e+003
7.715225e+001	6.690753e+003
7.719994e+001	6.690764e+003
7.724762e+001	6.690775e+003
7.729530e+001	6.690785e+003
7.734298e+001	6.690797e+003
7.739067e+001	6.690808e+003
7.743835e+001	6.690819e+003
7.748604e+001	6.690829e+003
7.753372e+001	6.690841e+003
7.758141e+001	6.690852e+003
7.762909e+001	6.690862e+003
7.767677e+001	6.690874e+003
7.772445e+001	6.690885e+003
7.777214e+001	6.690896e+003
7.781983e+001	6.690907e+003
7.786751e+001	6.690918e+003
7.791520e+001	6.690929e+003
7.796287e+001	6.690940e+003
7.801056e+001	6.690952e+003
7.805824e+001	6.690963e+003
7.810593e+001	6.690974e+003
7.815361e+001	6.690986e+003
7.820130e+001	6.690996e+003
7.824898e+001	6.691008e+003
7.829666e+001	6.691020e+003
7.834434e+001	6.691030e+003
7.839203e+001	6.691042e+003
7.843971e+001	6.691053e+003
7.848740e+001	6.691065e+003
7.853508e+001	6.691077e+003
7.858277e+001	6.691087e+003
7.863045e+001	6.691099e+003
7.867813e+001	6.691110e+003
7.872581e+001	6.691122e+003
7.877350e+001	6.691134e+003
7.882118e+001	6.691145e+003
7.886887e+001	6.691157e+003
7.891655e+001	6.691168e+003
7.896423e+001	6.691180e+003
7.901191e+001	6.691191e+003
7.905960e+001	6.691203e+003
7.910728e+001	6.691214e+003
7.915497e+001	6.691227e+003
7.920265e+001	6.691238e+003
7.925034e+001	6.691250e+003
7.929802e+001	6.691261e+003
7.934570e+001	6.691273e+003
7.939339e+001	6.691285e+003
7.944107e+001	6.691297e+003
7.948876e+001	6.691308e+003
7.953644e+001	6.691321e+003
7.958413e+001	6.691332e+003
7.963180e+001	6.691344e+003
7.967949e+001	6.691356e+003
7.972717e+001	6.691368e+003
7.977486e+001	6.691380e+003
7.982254e+001	6.691392e+003
7.987023e+001	6.691404e+003
7.991791e+001	6.691416e+003
7.996559e+001	6.691428e+003
8.001327e+001	6.691440e+003
8.006096e+001	6.691452e+003
8.010864e+001	6.691464e+003
8.015633e+001	6.691476e+003
8.020401e+001	6.691489e+003
8.025170e+001	6.691500e+003
8.029937e+001	6.691513e+003
8.034706e+001	6.691525e+003
8.039474e+001	6.691537e+003
8.044243e+001	6.691550e+003
8.049011e+001	6.691562e+003
8.053780e+001	6.691574e+003
8.058548e+001	6.691586e+003
8.063316e+001	6.691598e+003
8.068084e+001	6.691611e+003
8.072853e+001	6.691624e+003
8.077621e+001	6.691636e+003
8.082390e+001	6.691648e+003
8.087158e+001	6.691661e+003
8.091927e+001	6.691673e+003
8.096695e+001	6.691685e+003
8.101463e+001	6.691698e+003
8.106232e+001	6.691711e+003
8.111000e+001	6.691723e+003
8.115769e+001	6.691735e+003
8.120537e+001	6.691748e+003
8.125305e+001	6.691761e+003
8.130073e+001	6.691773e+003
8.134842e+001	6.691786e+003
8.139610e+001	6.691798e+003
8.144379e+001	6.691812e+003
8.149147e+001	6.691824e+003
8.153916e+001	6.691837e+003
8.158684e+001	6.691849e+003
8.163452e+001	6.691862e+003
8.168220e+001	6.691875e+003
8.172989e+001	6.691888e+003
8.177757e+001	6.691901e+003
8.182526e+001	6.691914e+003
8.187294e+001	6.691926e+003
8.192063e+001	6.691939e+003
8.196830e+001	6.691953e+003
8.201599e+001	6.691966e+003
8.206367e+001	6.691979e+003
8.211136e+001	6.691991e+003
8.215904e+001	6.692004e+003
8.220673e+001	6.692017e+003
8.225441e+001	6.692030e+003
8.230209e+001	6.692043e+003
8.234977e+001	6.692057e+003
8.239746e+001	6.692070e+003
8.244515e+001	6.692083e+003
8.249283e+001	6.692097e+003
8.254052e+001	6.692110e+003
8.258820e+001	6.692123e+003
8.263588e+001	6.692136e+003
8.268356e+001	6.692150e+003
8.273125e+001	6.692163e+003
8.277893e+001	6.692176e+003
8.282662e+001	6.692190e+003
8.287430e+001	6.692203e+003
8.292198e+001	6.692216e+003
8.296966e+001	6.692230e+003
8.301735e+001	6.692243e+003
8.306503e+001	6.692257e+003
8.311272e+001	6.692270e+003
8.316040e+001	6.692284e+003
8.320809e+001	6.692298e+003
8.325577e+001	6.692311e+003
8.330345e+001	6.692325e+003
8.335113e+001	6.692338e+003
8.339882e+001	6.692352e+003
8.344650e+001	6.692365e+003
8.349419e+001	6.692379e+003
8.354187e+001	6.692393e+003
8.358955e+001	6.692407e+003
8.363723e+001	6.692420e+003
8.368492e+001	6.692434e+003
8.373260e+001	6.692448e+003
8.378029e+001	6.692462e+003
8.382797e+001	6.692476e+003
8.387566e+001	6.692489e+003
8.392334e+001	6.692504e+003
8.397102e+001	6.692518e+003
8.401871e+001	6.692532e+003
8.406639e+001	6.692546e+003
8.411408e+001	6.692560e+003
8.416176e+001	6.692574e+003
8.420945e+001	6.692588e+003
8.425713e+001	6.692602e+003
8.430481e+001	6.692617e+003
8.435249e+001	6.692630e+003
8.440018e+001	6.692644e+003
8.444786e+001	6.692659e+003
8.449555e+001	6.692673e+003
8.454323e+001	6.692687e+003
8.459091e+001	6.692701e+003
8.463859e+001	6.692716e+003
8.468628e+001	6.692731e+003
8.473396e+001	6.692744e+003
8.478165e+001	6.692759e+003
8.482933e+001	6.692774e+003
8.487702e+001	6.692788e+003
8.492470e+001	6.692802e+003
8.497238e+001	6.692817e+003
8.502006e+001	6.692832e+003
8.506775e+001	6.692846e+003
8.511543e+001	6.692861e+003
8.516312e+001	6.692875e+003
8.521080e+001	6.692890e+003
8.525848e+001	6.692905e+003
8.530616e+001	6.692919e+003
8.535385e+001	6.692934e+003
8.540153e+001	6.692949e+003
8.544922e+001	6.692964e+003
8.549691e+001	6.692979e+003
8.554459e+001	6.692993e+003
8.559227e+001	6.693008e+003
8.563995e+001	6.693023e+003
8.568764e+001	6.693038e+003
8.573532e+001	6.693053e+003
8.578301e+001	6.693068e+003
8.583069e+001	6.693083e+003
8.587838e+001	6.693098e+003
8.592605e+001	6.693113e+003
8.597374e+001	6.693128e+003
8.602142e+001	6.693144e+003
8.606911e+001	6.693158e+003
8.611679e+001	6.693174e+003
8.616448e+001	6.693189e+003
8.621216e+001	6.693204e+003
8.625984e+001	6.693220e+003
8.630752e+001	6.693234e+003
8.635521e+001	6.693250e+003
8.640289e+001	6.693265e+003
8.645058e+001	6.693281e+003
8.649826e+001	6.693296e+003
8.654595e+001	6.693311e+003
8.659363e+001	6.693327e+003
8.664131e+001	6.693342e+003
8.668899e+001	6.693358e+003
8.673668e+001	6.693374e+003
8.678436e+001	6.693389e+003
8.683205e+001	6.693405e+003
8.687973e+001	6.693421e+003
8.692741e+001	6.693436e+003
8.697509e+001	6.693452e+003
8.702278e+001	6.693468e+003
8.707047e+001	6.693483e+003
8.711815e+001	6.693499e+003
8.716584e+001	6.693515e+003
8.721352e+001	6.693531e+003
8.726120e+001	6.693547e+003
8.730888e+001	6.693563e+003
8.735657e+001	6.693579e+003
8.740425e+001	6.693595e+003
8.745194e+001	6.693610e+003
8.749962e+001	6.693627e+003
8.754730e+001	6.693643e+003
8.759498e+001	6.693659e+003
8.764267e+001	6.693675e+003
8.769035e+001	6.693691e+003
8.773804e+001	6.693707e+003
8.778572e+001	6.693724e+003
8.783341e+001	6.693740e+003
8.788109e+001	6.693756e+003
8.792877e+001	6.693773e+003
8.797645e+001	6.693789e+003
8.802414e+001	6.693805e+003
8.807182e+001	6.693821e+003
8.811951e+001	6.693838e+003
8.816719e+001	6.693855e+003
8.821488e+001	6.693872e+003
8.826255e+001	6.693888e+003
8.831024e+001	6.693905e+003
8.835792e+001	6.693921e+003
8.840561e+001	6.693938e+003
8.845329e+001	6.693954e+003
8.850098e+001	6.693971e+003
8.854866e+001	6.693988e+003
8.859634e+001	6.694005e+003
8.864403e+001	6.694021e+003
8.869171e+001	6.694038e+003
8.873940e+001	6.694055e+003
8.878708e+001	6.694072e+003
8.883477e+001	6.694089e+003
8.888245e+001	6.694106e+003
8.893013e+001	6.694123e+003
8.897781e+001	6.694140e+003
8.902550e+001	6.694157e+003
8.907318e+001	6.694174e+003
8.912087e+001	6.694191e+003
8.916855e+001	6.694208e+003
8.921623e+001	6.694226e+003
8.926391e+001	6.694243e+003
8.931160e+001	6.694260e+003
8.935928e+001	6.694277e+003
8.940697e+001	6.694294e+003
8.945465e+001	6.694312e+003
8.950234e+001	6.694329e+003
8.955002e+001	6.694347e+003
8.959770e+001	6.694365e+003
8.964538e+001	6.694382e+003
8.969307e+001	6.694399e+003
8.974075e+001	6.694417e+003
8.978844e+001	6.694435e+003
8.983612e+001	6.694452e+003
8.988380e+001	6.694470e+003
8.993148e+001	6.694488e+003
8.997917e+001	6.694506e+003
9.002686e+001	6.694523e+003
9.007454e+001	6.694541e+003
9.012223e+001	6.694559e+003
9.016991e+001	6.694577e+003
9.021759e+001	6.694595e+003
9.026527e+001	6.694613e+003
9.031296e+001	6.694631e+003
9.036064e+001	6.694649e+003
9.040833e+001	6.694667e+003
9.045601e+001	6.694685e+003
9.050370e+001	6.694703e+003
9.055138e+001	6.694721e+003
9.059906e+001	6.694740e+003
9.064674e+001	6.694757e+003
9.069443e+001	6.694776e+003
9.074211e+001	6.694794e+003
9.078980e+001	6.694813e+003
9.083748e+001	6.694831e+003
9.088516e+001	6.694850e+003
9.093284e+001	6.694868e+003
9.098053e+001	6.694887e+003
9.102821e+001	6.694905e+003
9.107590e+001	6.694924e+003
9.112358e+001	6.694942e+003
9.117127e+001	6.694961e+003
9.121895e+001	6.694980e+003
9.126663e+001	6.694999e+003
9.131431e+001	6.695017e+003
9.136200e+001	6.695036e+003
9.140968e+001	6.695055e+003
9.145737e+001	6.695074e+003
9.150505e+001	6.695093e+003
9.155273e+001	6.695112e+003
9.160042e+001	6.695131e+003
9.164810e+001	6.695150e+003
9.169579e+001	6.695169e+003
9.174347e+001	6.695188e+003
9.179116e+001	6.695207e+003
9.183884e+001	6.695227e+003
9.188652e+001	6.695246e+003
9.193420e+001	6.695265e+003
9.198189e+001	6.695284e+003
9.202957e+001	6.695304e+003
9.207726e+001	6.695323e+003
9.212494e+001	6.695342e+003
9.217262e+001	6.695362e+003
9.222030e+001	6.695381e+003
9.226799e+001	6.695401e+003
9.231567e+001	6.695421e+003
9.236336e+001	6.695440e+003
9.241104e+001	6.695460e+003
9.245873e+001	6.695480e+003
9.250641e+001	6.695499e+003
9.255409e+001	6.695519e+003
9.260177e+001	6.695539e+003
9.264946e+001	6.695559e+003
9.269714e+001	6.695579e+003
9.274483e+001	6.695599e+003
9.279251e+001	6.695619e+003
9.284020e+001	6.695639e+003
9.288788e+001	6.695659e+003
9.293556e+001	6.695679e+003
9.298324e+001	6.695700e+003
9.303093e+001	6.695720e+003
9.307861e+001	6.695740e+003
9.312630e+001	6.695760e+003
9.317398e+001	6.695780e+003
9.322166e+001	6.695801e+003
9.326935e+001	6.695821e+003
9.331703e+001	6.695841e+003
9.336472e+001	6.695862e+003
9.341240e+001	6.695883e+003
9.346009e+001	6.695904e+003
9.350777e+001	6.695924e+003
9.355545e+001	6.695945e+003
9.360313e+001	6.695965e+003
9.365082e+001	6.695986e+003
9.369850e+001	6.696007e+003
9.374619e+001	6.696028e+003
9.379387e+001	6.696049e+003
9.384155e+001	6.696069e+003
9.388923e+001	6.696091e+003
9.393692e+001	6.696112e+003
9.398460e+001	6.696133e+003
9.403229e+001	6.696154e+003
9.407997e+001	6.696175e+003
9.412766e+001	6.696196e+003
9.417534e+001	6.696217e+003
9.422302e+001	6.696239e+003
9.427070e+001	6.696260e+003
9.431839e+001	6.696281e+003
9.436607e+001	6.696303e+003
9.441376e+001	6.696324e+003
9.446144e+001	6.696346e+003
9.450912e+001	6.696368e+003
9.455680e+001	6.696389e+003
9.460449e+001	6.696411e+003
9.465218e+001	6.696433e+003
9.469986e+001	6.696455e+003
9.474755e+001	6.696476e+003
9.479523e+001	6.696498e+003
9.484291e+001	6.696520e+003
9.489059e+001	6.696542e+003
9.493828e+001	6.696564e+003
9.498596e+001	6.696586e+003
9.503365e+001	6.696608e+003
9.508133e+001	6.696630e+003
9.512902e+001	6.696653e+003
9.517670e+001	6.696674e+003
9.522438e+001	6.696696e+003
9.527206e+001	6.696719e+003
9.531975e+001	6.696741e+003
9.536743e+001	6.696764e+003
9.541512e+001	6.696787e+003
9.546280e+001	6.696809e+003
9.551048e+001	6.696831e+003
9.555816e+001	6.696854e+003
9.560585e+001	6.696877e+003
9.565353e+001	6.696899e+003
9.570122e+001	6.696922e+003
9.574890e+001	6.696945e+003
9.579659e+001	6.696968e+003
9.584427e+001	6.696991e+003
9.589195e+001	6.697014e+003
9.593963e+001	6.697037e+003
9.598732e+001	6.697060e+003
9.603500e+001	6.697083e+003
9.608269e+001	6.697106e+003
9.613038e+001	6.697129e+003
9.617805e+001	6.697153e+003
9.622574e+001	6.697176e+003
9.627342e+001	6.697199e+003
9.632111e+001	6.697223e+003
9.636879e+001	6.697246e+003
9.641648e+001	6.697270e+003
9.646416e+001	6.697293e+003
9.651184e+001	6.697317e+003
9.655952e+001	6.697340e+003
9.660721e+001	6.697364e+003
9.665489e+001	6.697387e+003
9.670258e+001	6.697411e+003
9.675026e+001	6.697435e+003
9.679795e+001	6.697459e+003
9.684562e+001	6.697483e+003
9.689331e+001	6.697508e+003
9.694099e+001	6.697532e+003
9.698868e+001	6.697555e+003
9.703636e+001	6.697580e+003
9.708405e+001	6.697604e+003
9.713173e+001	6.697629e+003
9.717941e+001	6.697652e+003
9.722709e+001	6.697677e+003
9.727478e+001	6.697702e+003
9.732246e+001	6.697726e+003
9.737015e+001	6.697750e+003
9.741783e+001	6.697775e+003
9.746552e+001	6.697800e+003
9.751320e+001	6.697824e+003
9.756088e+001	6.697850e+003
9.760856e+001	6.697874e+003
9.765625e+001	6.697899e+003
9.770394e+001	6.697924e+003
9.775162e+001	6.697949e+003
9.779930e+001	6.697974e+003
9.784698e+001	6.697999e+003
9.789467e+001	6.698025e+003
9.794235e+001	6.698049e+003
9.799004e+001	6.698075e+003
9.803772e+001	6.698100e+003
9.808541e+001	6.698126e+003
9.813309e+001	6.698151e+003
9.818077e+001	6.698176e+003
9.822845e+001	6.698202e+003
9.827614e+001	6.698228e+003
9.832382e+001	6.698253e+003
9.837151e+001	6.698279e+003
9.841919e+001	6.698305e+003
9.846688e+001	6.698330e+003
9.851455e+001	6.698357e+003
9.856224e+001	6.698383e+003
9.860992e+001	6.698409e+003
9.865761e+001	6.698434e+003
9.870529e+001	6.698461e+003
9.875298e+001	6.698487e+003
9.880066e+001	6.698514e+003
9.884834e+001	6.698540e+003
9.889602e+001	6.698566e+003
9.894371e+001	6.698592e+003
9.899139e+001	6.698619e+003
9.903908e+001	6.698646e+003
9.908676e+001	6.698672e+003
9.913445e+001	6.698699e+003
9.918212e+001	6.698726e+003
9.922981e+001	6.698753e+003
9.927750e+001	6.698780e+003
9.932518e+001	6.698807e+003
9.937287e+001	6.698833e+003
9.942055e+001	6.698860e+003
9.946823e+001	6.698887e+003
9.951591e+001	6.698914e+003
9.956360e+001	6.698942e+003
9.961128e+001	6.698969e+003
9.965897e+001	6.698997e+003
9.970665e+001	6.699024e+003
9.975434e+001	6.699051e+003
9.980202e+001	6.699079e+003
9.984970e+001	6.699107e+003
9.989738e+001	6.699134e+003
9.994507e+001	6.699162e+003
9.999275e+001	6.699190e+003
1.000404e+002	6.699218e+003
1.000881e+002	6.699246e+003
1.001358e+002	6.699273e+003
1.001835e+002	6.699302e+003
1.002312e+002	6.699330e+003
[truncated: 39,841 more rows]
