# Supplementary material for: Contact-free experimental determination of the static flexural spring constant of cantilever sensors using a microfluidic force tool
Source: Beilstein J Nanotechnol. 2016 Mar 30;7:492–500. doi: 10.3762/bjnano.7.43 (PMC4901535; doi:10.3762/bjnano.7.43)
Supplement: File 1 — Raw data of thermal noise spectra, cantilever deflection under fluid flow, and sensitivity values σ1. [file Beilstein_J_Nanotechnol-07-492-s001.zip › Supporting information and raw data/Tap150A-0-Chip6_perpg2_h100_ch100_offset0_Tune1_1.txt]

kHz	fm�/Hz
4.959106e+000	2.541797e+003
5.006790e+000	2.541797e+003
5.054474e+000	2.740318e+003
5.102158e+000	2.761352e+003
5.149841e+000	2.815193e+003
5.197525e+000	2.761352e+003
5.245209e+000	2.815193e+003
5.292893e+000	3.301393e+003
5.340576e+000	3.301393e+003
5.388260e+000	2.871256e+003
5.435943e+000	2.702188e+003
5.483627e+000	2.597750e+003
5.531311e+000	2.597750e+003
5.578995e+000	2.970977e+003
5.626679e+000	2.992062e+003
5.674362e+000	2.970977e+003
5.722046e+000	2.930169e+003
5.769729e+000	2.930169e+003
5.817413e+000	2.939062e+003
5.865097e+000	2.939062e+003
5.912781e+000	2.800795e+003
5.960464e+000	2.800795e+003
6.008148e+000	3.088553e+003
6.055832e+000	3.088553e+003
6.103516e+000	2.765773e+003
6.151199e+000	2.757224e+003
6.198883e+000	2.757224e+003
6.246567e+000	2.997927e+003
6.294250e+000	3.047240e+003
6.341934e+000	3.103043e+003
6.389618e+000	3.326187e+003
6.437302e+000	3.103043e+003
6.484985e+000	3.166101e+003
6.532669e+000	3.111023e+003
6.580353e+000	3.111023e+003
6.628037e+000	3.072511e+003
6.675720e+000	2.865962e+003
6.723404e+000	2.865962e+003
6.771088e+000	2.865962e+003
6.818771e+000	3.250741e+003
6.866455e+000	3.250741e+003
6.914139e+000	3.205509e+003
6.961822e+000	3.158815e+003
7.009506e+000	3.158815e+003
7.057190e+000	2.967258e+003
7.104874e+000	2.900206e+003
7.152558e+000	2.900206e+003
7.200241e+000	2.952475e+003
7.247925e+000	3.108064e+003
7.295608e+000	3.417494e+003
7.343292e+000	3.417494e+003
7.390976e+000	3.117203e+003
7.438660e+000	3.117203e+003
7.486343e+000	3.019608e+003
7.534027e+000	3.231859e+003
7.581711e+000	3.048040e+003
7.629395e+000	3.048040e+003
7.677078e+000	2.598783e+003
7.724762e+000	2.598783e+003
7.772446e+000	2.974168e+003
7.820129e+000	2.974168e+003
7.867813e+000	3.044864e+003
7.915497e+000	2.939325e+003
7.963181e+000	2.939325e+003
8.010864e+000	2.937227e+003
8.058548e+000	2.917583e+003
8.106231e+000	2.937227e+003
8.153916e+000	3.239305e+003
8.201600e+000	3.239305e+003
8.249283e+000	2.922486e+003
8.296967e+000	2.922486e+003
8.344650e+000	3.073417e+003
8.392334e+000	3.073417e+003
8.440018e+000	2.837100e+003
8.487701e+000	2.837100e+003
8.535385e+000	2.740700e+003
8.583068e+000	2.891930e+003
8.630753e+000	2.740700e+003
8.678437e+000	2.711465e+003
8.726120e+000	2.711465e+003
8.773804e+000	3.022860e+003
8.821487e+000	3.022860e+003
8.869171e+000	3.132909e+003
8.916854e+000	3.132909e+003
8.964539e+000	3.132909e+003
9.012223e+000	2.921531e+003
9.059906e+000	2.921531e+003
9.107590e+000	2.921531e+003
9.155273e+000	2.889060e+003
9.202957e+000	2.690102e+003
9.250641e+000	2.690102e+003
9.298324e+000	2.690102e+003
9.346008e+000	2.586591e+003
9.393692e+000	2.586591e+003
9.441376e+000	2.515977e+003
9.489060e+000	2.515977e+003
9.536743e+000	2.552187e+003
9.584427e+000	2.552187e+003
9.632110e+000	2.537211e+003
9.679794e+000	2.537211e+003
9.727479e+000	3.214799e+003
9.775162e+000	3.214799e+003
9.822846e+000	3.076068e+003
9.870529e+000	2.855038e+003
9.918213e+000	2.855038e+003
9.965896e+000	2.643274e+003
1.001358e+001	2.643274e+003
1.006126e+001	2.643274e+003
1.010895e+001	2.845475e+003
1.015663e+001	2.845475e+003
1.020432e+001	2.699413e+003
1.025200e+001	2.699413e+003
1.029968e+001	2.748816e+003
1.034737e+001	2.748816e+003
1.039505e+001	2.748816e+003
1.044273e+001	2.832221e+003
1.049042e+001	2.832221e+003
1.053810e+001	2.494723e+003
1.058579e+001	2.473033e+003
1.063347e+001	2.473033e+003
1.068115e+001	2.501686e+003
1.072884e+001	2.501686e+003
1.077652e+001	2.462427e+003
1.082420e+001	2.462427e+003
1.087189e+001	2.568285e+003
1.091957e+001	2.568285e+003
1.096725e+001	2.539789e+003
1.101494e+001	2.539789e+003
1.106262e+001	2.409723e+003
1.111031e+001	2.573701e+003
1.115799e+001	2.409723e+003
1.120567e+001	2.582387e+003
1.125336e+001	2.203421e+003
1.130104e+001	2.637446e+003
1.134872e+001	2.568462e+003
1.139641e+001	2.583170e+003
1.144409e+001	2.583170e+003
1.149178e+001	2.583170e+003
1.153946e+001	2.687822e+003
1.158714e+001	2.426431e+003
1.163483e+001	2.426431e+003
1.168251e+001	2.426431e+003
1.173019e+001	2.479866e+003
1.177788e+001	2.479866e+003
1.182556e+001	2.471815e+003
1.187325e+001	2.471815e+003
1.192093e+001	2.470459e+003
1.196861e+001	2.505077e+003
1.201630e+001	2.470459e+003
1.206398e+001	2.309743e+003
1.211166e+001	2.309743e+003
1.215935e+001	2.482330e+003
1.220703e+001	2.482330e+003
1.225471e+001	2.528700e+003
1.230240e+001	2.408824e+003
1.235008e+001	2.323044e+003
1.239777e+001	2.323044e+003
1.244545e+001	2.443171e+003
1.249313e+001	2.443171e+003
1.254082e+001	2.443171e+003
1.258850e+001	2.280945e+003
1.263618e+001	2.280945e+003
1.268387e+001	2.257951e+003
1.273155e+001	2.257951e+003
1.277924e+001	2.349266e+003
1.282692e+001	2.403466e+003
1.287460e+001	2.364840e+003
1.292229e+001	2.364840e+003
1.296997e+001	2.339637e+003
1.301765e+001	2.310382e+003
1.306534e+001	2.310382e+003
1.311302e+001	2.414785e+003
1.316071e+001	2.414785e+003
1.320839e+001	2.304697e+003
1.325607e+001	2.304697e+003
1.330376e+001	2.252675e+003
1.335144e+001	2.359163e+003
1.339912e+001	2.290695e+003
1.344681e+001	2.290695e+003
1.349449e+001	2.290695e+003
1.354218e+001	2.394075e+003
1.358986e+001	2.431363e+003
1.363754e+001	2.394075e+003
1.368523e+001	2.342933e+003
1.373291e+001	2.020458e+003
1.378059e+001	2.020458e+003
1.382828e+001	2.102490e+003
1.387596e+001	2.234447e+003
1.392364e+001	2.102490e+003
1.397133e+001	2.234447e+003
1.401901e+001	2.230677e+003
1.406670e+001	2.230677e+003
1.411438e+001	2.000487e+003
1.416206e+001	2.000487e+003
1.420975e+001	2.459476e+003
1.425743e+001	2.459476e+003
1.430512e+001	2.373832e+003
1.435280e+001	2.373832e+003
1.440048e+001	2.394467e+003
1.444817e+001	2.394467e+003
1.449585e+001	2.359950e+003
1.454353e+001	2.231725e+003
1.459122e+001	2.231725e+003
1.463890e+001	2.197134e+003
1.468658e+001	2.197134e+003
1.473427e+001	2.197134e+003
1.478195e+001	2.213243e+003
1.482964e+001	2.213243e+003
1.487732e+001	2.213243e+003
1.492500e+001	2.239724e+003
1.497269e+001	2.258514e+003
1.502037e+001	2.285912e+003
1.506805e+001	2.285912e+003
1.511574e+001	2.218568e+003
1.516342e+001	2.149561e+003
1.521111e+001	2.149561e+003
1.525879e+001	2.072917e+003
1.530647e+001	2.072917e+003
1.535416e+001	2.072917e+003
1.540184e+001	2.221505e+003
1.544952e+001	2.221505e+003
1.549721e+001	2.134456e+003
1.554489e+001	2.134456e+003
1.559258e+001	2.182961e+003
1.564026e+001	2.182961e+003
1.568794e+001	2.115759e+003
1.573563e+001	2.115759e+003
1.578331e+001	2.140510e+003
1.583099e+001	2.140510e+003
1.587868e+001	2.049895e+003
1.592636e+001	2.015541e+003
1.597404e+001	2.049895e+003
1.602173e+001	1.895934e+003
1.606941e+001	2.150685e+003
1.611710e+001	2.178609e+003
1.616478e+001	2.178609e+003
1.621246e+001	2.178609e+003
1.626015e+001	2.031502e+003
1.630783e+001	2.015542e+003
1.635551e+001	1.929938e+003
1.640320e+001	1.929938e+003
1.645088e+001	2.133031e+003
1.649857e+001	2.150471e+003
1.654625e+001	2.503525e+003
1.659393e+001	2.150471e+003
1.664162e+001	2.076301e+003
1.668930e+001	1.936961e+003
1.673698e+001	1.848778e+003
1.678467e+001	1.896147e+003
1.683235e+001	1.896147e+003
1.688004e+001	2.021429e+003
1.692772e+001	2.021429e+003
1.697540e+001	2.021429e+003
1.702309e+001	1.999825e+003
1.707077e+001	1.919195e+003
1.711845e+001	1.919195e+003
1.716614e+001	2.115340e+003
1.721382e+001	2.115340e+003
1.726151e+001	2.024605e+003
1.730919e+001	1.979880e+003
1.735687e+001	1.979880e+003
1.740456e+001	1.979880e+003
1.745224e+001	2.080433e+003
1.749992e+001	1.943933e+003
1.754761e+001	1.971676e+003
1.759529e+001	1.971676e+003
1.764297e+001	1.971676e+003
1.769066e+001	2.043039e+003
1.773834e+001	1.856593e+003
1.778603e+001	1.820504e+003
1.783371e+001	1.820504e+003
1.788139e+001	1.863508e+003
1.792908e+001	1.863508e+003
1.797676e+001	1.863508e+003
1.802445e+001	1.935101e+003
1.807213e+001	2.109210e+003
1.811981e+001	1.935101e+003
1.816750e+001	1.905956e+003
1.821518e+001	1.905956e+003
1.826286e+001	1.905956e+003
1.831055e+001	1.866236e+003
1.835823e+001	1.723771e+003
1.840591e+001	1.866236e+003
1.845360e+001	2.092031e+003
1.850128e+001	2.092031e+003
1.854896e+001	2.020625e+003
1.859665e+001	1.991418e+003
1.864433e+001	1.929748e+003
1.869202e+001	1.929748e+003
1.873970e+001	1.929748e+003
1.878738e+001	1.929160e+003
1.883507e+001	1.883668e+003
1.888275e+001	1.883668e+003
1.893044e+001	1.883668e+003
1.897812e+001	1.812169e+003
1.902580e+001	1.984722e+003
1.907349e+001	2.005181e+003
1.912117e+001	2.032605e+003
1.916885e+001	2.105977e+003
1.921654e+001	2.216654e+003
1.926422e+001	2.275010e+003
1.931190e+001	2.437396e+003
1.935959e+001	3.030728e+003
1.940727e+001	3.511299e+003
1.945496e+001	6.416968e+003
1.950264e+001	3.291977e+004
1.955032e+001	3.291977e+004
1.959801e+001	7.861453e+003
1.964569e+001	3.480205e+003
1.969338e+001	2.701626e+003
1.974106e+001	2.611914e+003
1.978874e+001	2.316377e+003
1.983643e+001	2.184830e+003
1.988411e+001	1.988827e+003
1.993179e+001	1.988827e+003
1.997948e+001	1.952418e+003
2.002716e+001	1.936850e+003
2.007484e+001	1.730301e+003
2.012253e+001	1.730301e+003
2.017021e+001	2.077993e+003
2.021789e+001	2.077993e+003
2.026558e+001	1.974252e+003
2.031326e+001	1.831310e+003
2.036095e+001	1.831310e+003
2.040863e+001	1.824244e+003
2.045631e+001	1.884711e+003
2.050400e+001	1.824244e+003
2.055168e+001	1.863957e+003
2.059937e+001	1.863957e+003
2.064705e+001	1.870082e+003
2.069473e+001	1.870082e+003
2.074242e+001	1.850800e+003
2.079010e+001	1.779414e+003
2.083778e+001	1.849466e+003
2.088547e+001	1.834035e+003
2.093315e+001	1.849466e+003
2.098084e+001	1.863294e+003
2.102852e+001	1.863294e+003
2.107620e+001	1.842885e+003
2.112389e+001	1.842885e+003
2.117157e+001	1.766397e+003
2.121925e+001	1.772501e+003
2.126694e+001	1.729241e+003
2.131462e+001	1.762612e+003
2.136230e+001	1.762612e+003
2.140999e+001	1.898102e+003
2.145767e+001	1.898102e+003
2.150536e+001	1.785154e+003
2.155304e+001	1.754113e+003
2.160072e+001	1.749802e+003
2.164841e+001	1.749802e+003
2.169609e+001	1.749802e+003
2.174377e+001	1.649469e+003
2.179146e+001	1.649469e+003
2.183914e+001	1.657154e+003
2.188683e+001	1.657154e+003
2.193451e+001	1.626321e+003
2.198219e+001	1.626321e+003
2.202988e+001	1.759435e+003
2.207756e+001	1.826797e+003
2.212524e+001	1.826797e+003
2.217293e+001	1.797226e+003
2.222061e+001	1.718368e+003
2.226829e+001	1.718368e+003
2.231598e+001	1.742292e+003
2.236366e+001	1.742292e+003
2.241135e+001	1.832503e+003
2.245903e+001	1.681598e+003
2.250671e+001	1.832503e+003
2.255440e+001	1.670680e+003
2.260208e+001	1.605755e+003
2.264977e+001	1.605755e+003
2.269745e+001	1.658753e+003
2.274513e+001	1.745781e+003
2.279282e+001	1.745781e+003
2.284050e+001	1.745781e+003
2.288818e+001	1.794006e+003
2.293587e+001	1.794006e+003
2.298355e+001	1.794006e+003
2.303123e+001	1.900779e+003
2.307892e+001	1.900779e+003
2.312660e+001	1.785387e+003
2.317429e+001	1.785387e+003
2.322197e+001	1.785387e+003
2.326965e+001	1.777702e+003
2.331734e+001	1.777702e+003
2.336502e+001	1.809126e+003
2.341271e+001	1.974482e+003
2.346039e+001	1.974482e+003
2.350807e+001	1.843346e+003
2.355576e+001	1.790807e+003
2.360344e+001	1.745425e+003
2.365112e+001	1.592586e+003
2.369881e+001	1.592586e+003
2.374649e+001	1.792964e+003
2.379417e+001	2.004094e+003
2.384186e+001	2.004094e+003
2.388954e+001	1.996265e+003
2.393722e+001	1.716428e+003
2.398491e+001	1.864006e+003
2.403259e+001	1.654452e+003
2.408028e+001	1.654452e+003
2.412796e+001	1.654452e+003
2.417564e+001	1.601733e+003
2.422333e+001	1.633574e+003
2.427101e+001	1.633574e+003
2.431870e+001	1.790401e+003
2.436638e+001	1.790401e+003
2.441406e+001	1.797740e+003
2.446175e+001	1.578825e+003
2.450943e+001	1.578825e+003
2.455711e+001	1.578825e+003
2.460480e+001	1.667819e+003
2.465248e+001	1.701873e+003
2.470016e+001	1.701873e+003
2.474785e+001	1.755333e+003
2.479553e+001	1.714416e+003
2.484322e+001	1.875429e+003
2.489090e+001	1.752132e+003
2.493858e+001	1.792162e+003
2.498627e+001	1.792162e+003
2.503395e+001	1.792162e+003
2.508163e+001	1.791983e+003
2.512932e+001	1.791983e+003
2.517700e+001	1.764807e+003
2.522469e+001	1.810300e+003
2.527237e+001	1.764807e+003
2.532005e+001	1.586207e+003
2.536774e+001	1.586207e+003
2.541542e+001	1.620117e+003
2.546310e+001	1.680245e+003
2.551079e+001	1.702435e+003
2.555847e+001	1.702435e+003
2.560616e+001	1.633933e+003
2.565384e+001	1.594275e+003
2.570152e+001	1.594275e+003
2.574921e+001	1.594275e+003
2.579689e+001	1.572252e+003
2.584457e+001	1.659283e+003
2.589226e+001	1.572252e+003
2.593994e+001	1.659283e+003
2.598763e+001	1.531446e+003
2.603531e+001	1.572675e+003
2.608299e+001	1.480699e+003
2.613068e+001	1.572675e+003
2.617836e+001	1.574123e+003
2.622604e+001	1.600736e+003
2.627373e+001	1.709193e+003
2.632141e+001	1.709193e+003
2.636910e+001	1.525496e+003
2.641678e+001	1.525496e+003
2.646446e+001	1.535008e+003
2.651215e+001	1.598204e+003
2.655983e+001	1.598204e+003
2.660751e+001	1.615454e+003
2.665520e+001	1.667643e+003
2.670288e+001	1.779868e+003
2.675056e+001	1.779868e+003
2.679825e+001	1.696187e+003
2.684593e+001	1.666131e+003
2.689362e+001	1.666131e+003
2.694130e+001	1.780397e+003
2.698898e+001	1.794435e+003
2.703667e+001	1.874179e+003
2.708435e+001	1.874179e+003
2.713204e+001	1.764966e+003
2.717972e+001	1.726683e+003
2.722740e+001	1.764966e+003
2.727509e+001	1.858882e+003
2.732277e+001	1.858882e+003
2.737045e+001	1.697804e+003
2.741814e+001	1.616495e+003
2.746582e+001	1.616495e+003
2.751350e+001	1.620372e+003
2.756119e+001	1.734020e+003
2.760887e+001	1.660945e+003
2.765655e+001	1.660945e+003
2.770424e+001	1.628099e+003
2.775192e+001	1.591988e+003
2.779961e+001	1.612509e+003
2.784729e+001	1.591988e+003
2.789497e+001	1.612509e+003
2.794266e+001	1.510255e+003
2.799034e+001	1.688731e+003
2.803803e+001	1.498277e+003
2.808571e+001	1.506698e+003
2.813339e+001	1.506698e+003
2.818108e+001	1.536687e+003
2.822876e+001	1.536687e+003
2.827644e+001	1.566727e+003
2.832413e+001	1.620504e+003
2.837181e+001	1.620504e+003
2.841949e+001	1.622790e+003
2.846718e+001	1.528921e+003
2.851486e+001	1.548428e+003
2.856254e+001	1.548428e+003
2.861023e+001	1.571866e+003
2.865791e+001	1.695992e+003
2.870560e+001	1.666894e+003
2.875328e+001	1.666894e+003
2.880096e+001	1.666894e+003
2.884865e+001	1.765035e+003
2.889633e+001	1.765035e+003
2.894402e+001	1.632208e+003
2.899170e+001	1.558944e+003
2.903938e+001	1.558944e+003
2.908707e+001	1.558944e+003
2.913475e+001	1.584944e+003
2.918243e+001	1.670373e+003
2.923012e+001	1.713773e+003
2.927780e+001	1.784461e+003
2.932548e+001	1.713773e+003
2.937317e+001	1.553996e+003
2.942085e+001	1.553996e+003
2.946854e+001	1.740345e+003
2.951622e+001	1.740345e+003
2.956390e+001	1.750883e+003
2.961159e+001	1.633842e+003
2.965927e+001	1.596140e+003
2.970696e+001	1.596140e+003
2.975464e+001	1.511984e+003
2.980232e+001	1.454618e+003
2.985001e+001	1.454618e+003
2.989769e+001	1.673281e+003
2.994537e+001	1.747218e+003
2.999306e+001	1.673281e+003
3.004074e+001	1.693166e+003
3.008842e+001	1.585880e+003
3.013611e+001	1.608526e+003
3.018379e+001	1.606775e+003
3.023148e+001	1.608526e+003
3.027916e+001	1.619677e+003
3.032684e+001	1.619677e+003
3.037453e+001	1.569859e+003
3.042221e+001	1.569859e+003
3.046989e+001	1.741572e+003
3.051758e+001	1.741572e+003
3.056526e+001	1.664239e+003
3.061295e+001	1.664239e+003
3.066063e+001	1.691469e+003
3.070831e+001	1.691469e+003
3.075600e+001	1.586766e+003
3.080368e+001	1.586766e+003
3.085136e+001	1.645742e+003
3.089905e+001	1.684615e+003
3.094673e+001	1.684615e+003
3.099442e+001	1.632838e+003
3.104210e+001	1.610207e+003
3.108978e+001	1.575720e+003
3.113747e+001	1.575720e+003
3.118515e+001	1.675473e+003
3.123283e+001	1.698321e+003
3.128052e+001	1.698321e+003
3.132820e+001	1.672690e+003
3.137588e+001	1.614216e+003
3.142357e+001	1.577640e+003
3.147125e+001	1.577640e+003
3.151894e+001	1.577640e+003
3.156662e+001	1.593822e+003
3.161430e+001	1.593822e+003
3.166199e+001	1.593822e+003
3.170967e+001	1.578855e+003
3.175736e+001	1.698356e+003
3.180504e+001	1.592278e+003
3.185272e+001	1.696514e+003
3.190041e+001	1.592278e+003
3.194809e+001	1.612608e+003
3.199577e+001	1.516141e+003
3.204346e+001	1.577249e+003
3.209114e+001	1.577249e+003
3.213882e+001	1.589058e+003
3.218651e+001	1.594244e+003
3.223419e+001	1.612095e+003
3.228187e+001	1.612095e+003
3.232956e+001	1.661913e+003
3.237724e+001	1.597089e+003
3.242493e+001	1.524693e+003
3.247261e+001	1.422185e+003
3.252029e+001	1.422185e+003
3.256798e+001	1.525324e+003
3.261566e+001	1.544754e+003
3.266335e+001	1.610901e+003
3.271103e+001	1.653828e+003
3.275871e+001	1.610901e+003
3.280640e+001	1.585238e+003
3.285408e+001	1.585238e+003
3.290177e+001	1.585238e+003
3.294945e+001	1.591875e+003
3.299713e+001	1.618916e+003
3.304482e+001	1.618916e+003
3.309250e+001	1.609091e+003
3.314018e+001	1.607343e+003
3.318787e+001	1.609091e+003
3.323555e+001	1.656131e+003
3.328323e+001	1.656131e+003
3.333092e+001	1.538407e+003
3.337860e+001	1.497022e+003
3.342629e+001	1.497022e+003
3.347397e+001	1.507222e+003
3.352165e+001	1.507222e+003
3.356934e+001	1.507222e+003
3.361702e+001	1.454867e+003
3.366470e+001	1.568356e+003
3.371239e+001	1.506576e+003
3.376007e+001	1.568356e+003
3.380775e+001	1.539816e+003
3.385544e+001	1.695587e+003
3.390312e+001	1.643345e+003
3.395080e+001	1.643345e+003
3.399849e+001	1.643345e+003
3.404617e+001	1.693759e+003
3.409386e+001	1.693759e+003
3.414154e+001	1.659233e+003
3.418922e+001	1.557244e+003
3.423691e+001	1.489020e+003
3.428459e+001	1.489020e+003
3.433227e+001	1.489020e+003
3.437996e+001	1.545312e+003
3.442764e+001	1.545312e+003
3.447533e+001	1.495612e+003
3.452301e+001	1.495612e+003
3.457070e+001	1.495612e+003
3.461838e+001	1.519399e+003
3.466606e+001	1.519399e+003
3.471375e+001	1.544611e+003
3.476143e+001	1.873656e+003
3.480911e+001	2.013179e+003
3.485680e+001	2.013179e+003
3.490448e+001	1.851312e+003
3.495216e+001	1.593517e+003
3.499985e+001	1.593517e+003
3.504753e+001	1.730729e+003
3.509521e+001	1.730729e+003
3.514290e+001	1.631455e+003
3.519058e+001	1.545787e+003
3.523827e+001	1.495231e+003
3.528595e+001	1.491372e+003
3.533363e+001	1.491372e+003
3.538132e+001	1.650234e+003
3.542900e+001	1.650234e+003
3.547668e+001	1.612648e+003
3.552437e+001	1.514602e+003
3.557205e+001	1.514602e+003
3.561973e+001	1.654975e+003
3.566742e+001	1.654975e+003
3.571510e+001	1.654975e+003
3.576279e+001	1.571319e+003
3.581047e+001	1.720584e+003
3.585816e+001	1.575561e+003
3.590584e+001	1.575561e+003
3.595352e+001	1.553580e+003
3.600121e+001	1.552635e+003
3.604889e+001	1.553580e+003
3.609657e+001	1.575655e+003
3.614426e+001	1.575655e+003
3.619194e+001	1.570789e+003
3.623963e+001	1.412165e+003
3.628731e+001	1.412165e+003
3.633499e+001	1.464890e+003
3.638268e+001	1.488311e+003
3.643036e+001	1.549068e+003
3.647804e+001	1.586447e+003
3.652573e+001	1.586447e+003
3.657341e+001	1.444010e+003
3.662109e+001	1.444010e+003
3.666878e+001	1.537155e+003
3.671646e+001	1.652966e+003
3.676414e+001	1.652966e+003
3.681183e+001	1.582106e+003
3.685951e+001	1.582106e+003
3.690720e+001	1.522729e+003
3.695488e+001	1.633756e+003
3.700256e+001	1.522729e+003
3.705025e+001	1.461147e+003
3.709793e+001	1.461147e+003
3.714561e+001	1.546883e+003
3.719330e+001	1.593978e+003
3.724098e+001	1.546883e+003
3.728866e+001	1.576516e+003
3.733635e+001	1.576516e+003
3.738403e+001	1.634049e+003
3.743172e+001	1.634049e+003
3.747940e+001	1.604538e+003
3.752709e+001	1.499212e+003
3.757477e+001	1.515742e+003
3.762245e+001	1.515742e+003
3.767014e+001	1.607764e+003
3.771782e+001	1.607764e+003
3.776550e+001	1.533137e+003
3.781319e+001	1.533137e+003
3.786087e+001	1.566146e+003
3.790855e+001	1.566146e+003
3.795624e+001	1.593616e+003
3.800392e+001	1.593616e+003
3.805161e+001	1.623475e+003
3.809929e+001	1.623475e+003
3.814697e+001	1.477934e+003
3.819466e+001	1.477934e+003
3.824234e+001	1.504404e+003
3.829002e+001	1.504404e+003
3.833771e+001	1.568448e+003
3.838539e+001	1.568448e+003
3.843307e+001	1.568448e+003
3.848076e+001	1.436114e+003
3.852844e+001	1.436114e+003
3.857612e+001	1.371928e+003
3.862381e+001	1.489538e+003
3.867149e+001	1.489538e+003
3.871918e+001	1.528947e+003
3.876686e+001	1.551802e+003
3.881454e+001	1.685497e+003
3.886223e+001	1.685497e+003
3.890991e+001	1.586827e+003
3.895760e+001	1.586827e+003
3.900528e+001	2.117990e+003
3.905296e+001	2.669679e+003
3.910065e+001	2.669679e+003
3.914833e+001	1.660638e+003
3.919602e+001	1.470826e+003
3.924370e+001	1.624796e+003
3.929138e+001	1.571654e+003
3.933907e+001	1.583174e+003
3.938675e+001	1.583174e+003
3.943443e+001	1.583174e+003
3.948212e+001	1.539868e+003
3.952980e+001	1.405432e+003
3.957748e+001	1.405432e+003
3.962517e+001	1.445535e+003
3.967285e+001	1.513722e+003
3.972054e+001	1.513722e+003
3.976822e+001	1.513722e+003
3.981590e+001	1.547589e+003
3.986359e+001	1.590356e+003
3.991127e+001	1.590356e+003
3.995895e+001	1.566312e+003
4.000664e+001	1.521232e+003
4.005432e+001	1.521232e+003
4.010200e+001	1.521232e+003
4.014969e+001	1.464864e+003
4.019737e+001	1.443175e+003
4.024505e+001	1.443175e+003
4.029274e+001	1.592370e+003
4.034042e+001	1.592370e+003
4.038811e+001	1.393679e+003
4.043579e+001	1.393679e+003
4.048348e+001	1.490190e+003
4.053116e+001	1.490190e+003
4.057884e+001	1.490190e+003
4.062653e+001	1.471445e+003
4.067421e+001	1.471445e+003
4.072189e+001	1.471445e+003
4.076958e+001	1.441996e+003
4.081726e+001	1.580629e+003
4.086495e+001	1.521910e+003
4.091263e+001	1.594403e+003
4.096031e+001	1.626410e+003
4.100800e+001	1.643922e+003
4.105568e+001	1.643922e+003
4.110336e+001	1.643922e+003
4.115105e+001	1.636217e+003
4.119873e+001	1.547456e+003
4.124641e+001	1.547456e+003
4.129410e+001	1.386873e+003
4.134178e+001	1.381563e+003
4.138946e+001	1.381563e+003
4.143715e+001	1.379013e+003
4.148483e+001	1.437441e+003
4.153252e+001	1.438171e+003
4.158020e+001	1.556871e+003
4.162788e+001	1.614401e+003
4.167557e+001	1.614401e+003
4.172325e+001	1.458186e+003
4.177093e+001	1.408679e+003
4.181862e+001	1.408679e+003
4.186630e+001	1.438184e+003
4.191398e+001	1.455333e+003
4.196167e+001	1.457454e+003
4.200936e+001	1.485636e+003
4.205704e+001	1.550477e+003
4.210472e+001	1.550477e+003
4.215241e+001	1.464060e+003
4.220009e+001	1.448897e+003
4.224777e+001	1.385833e+003
4.229546e+001	1.385833e+003
4.234314e+001	1.548853e+003
4.239082e+001	1.555615e+003
4.243851e+001	1.575907e+003
4.248619e+001	1.575907e+003
4.253388e+001	1.379053e+003
4.258156e+001	1.379053e+003
4.262924e+001	1.385022e+003
4.267693e+001	1.534754e+003
4.272461e+001	1.534754e+003
4.277229e+001	1.534754e+003
4.281998e+001	1.576109e+003
4.286766e+001	1.604625e+003
4.291534e+001	1.737692e+003
4.296303e+001	1.737692e+003
4.301071e+001	1.489516e+003
4.305839e+001	1.489516e+003
4.310608e+001	1.489516e+003
4.315376e+001	1.601423e+003
4.320145e+001	1.601423e+003
4.324913e+001	1.601423e+003
4.329681e+001	1.533558e+003
4.334450e+001	1.494452e+003
4.339218e+001	1.403926e+003
4.343986e+001	1.376423e+003
4.348755e+001	1.376423e+003
4.353523e+001	1.455850e+003
4.358292e+001	1.455850e+003
4.363060e+001	1.455371e+003
4.367829e+001	1.455371e+003
4.372597e+001	1.448739e+003
4.377365e+001	1.448493e+003
4.382134e+001	1.448493e+003
4.386902e+001	1.580026e+003
4.391670e+001	1.587585e+003
4.396439e+001	1.597236e+003
4.401207e+001	1.597236e+003
4.405975e+001	1.525917e+003
4.410744e+001	1.379901e+003
4.415512e+001	1.379901e+003
4.420280e+001	1.379901e+003
4.425049e+001	1.415953e+003
4.429817e+001	1.439939e+003
4.434586e+001	1.612219e+003
4.439354e+001	1.612219e+003
4.444122e+001	1.572058e+003
4.448891e+001	1.565858e+003
4.453659e+001	1.445058e+003
4.458427e+001	1.443283e+003
4.463196e+001	1.443283e+003
4.467964e+001	1.443283e+003
4.472732e+001	1.453583e+003
4.477501e+001	1.453583e+003
4.482269e+001	1.413683e+003
4.487038e+001	1.413683e+003
4.491806e+001	1.404701e+003
4.496574e+001	1.404701e+003
4.501343e+001	1.375674e+003
4.506111e+001	1.375674e+003
4.510880e+001	1.377026e+003
4.515648e+001	1.492321e+003
4.520416e+001	1.492321e+003
4.525185e+001	1.472631e+003
4.529953e+001	1.472631e+003
4.534721e+001	1.478343e+003
4.539490e+001	1.499592e+003
4.544258e+001	1.499592e+003
4.549027e+001	1.401978e+003
4.553795e+001	1.401978e+003
4.558563e+001	1.416938e+003
4.563332e+001	1.416938e+003
4.568100e+001	1.416938e+003
4.572868e+001	1.489420e+003
4.577637e+001	1.489420e+003
4.582405e+001	1.489420e+003
4.587173e+001	1.459936e+003
4.591942e+001	1.604381e+003
4.596710e+001	1.529247e+003
4.601479e+001	1.529247e+003
4.606247e+001	1.520700e+003
4.611015e+001	1.432535e+003
4.615784e+001	1.435005e+003
4.620552e+001	1.432535e+003
4.625320e+001	1.435005e+003
4.630089e+001	1.515225e+003
4.634857e+001	1.515225e+003
4.639625e+001	1.369555e+003
4.644394e+001	1.316507e+003
4.649162e+001	1.369555e+003
4.653930e+001	1.405252e+003
4.658699e+001	1.405252e+003
4.663468e+001	1.436767e+003
4.668236e+001	1.436767e+003
4.673004e+001	1.510780e+003
4.677773e+001	1.529201e+003
4.682541e+001	1.541258e+003
4.687309e+001	1.541258e+003
4.692078e+001	1.519908e+003
4.696846e+001	1.519908e+003
4.701614e+001	1.587357e+003
4.706383e+001	1.587357e+003
4.711151e+001	1.570950e+003
4.715920e+001	1.448413e+003
4.720688e+001	1.413438e+003
4.725456e+001	1.413438e+003
4.730225e+001	1.526519e+003
4.734993e+001	1.526519e+003
4.739761e+001	1.496110e+003
4.744530e+001	1.496110e+003
4.749298e+001	1.496110e+003
4.754066e+001	1.486695e+003
4.758835e+001	1.436773e+003
4.763603e+001	1.286764e+003
4.768371e+001	1.286764e+003
4.773140e+001	1.546930e+003
4.777908e+001	1.582890e+003
4.782677e+001	1.582890e+003
4.787445e+001	1.495982e+003
4.792213e+001	1.482950e+003
4.796982e+001	1.424949e+003
4.801750e+001	1.424949e+003
4.806519e+001	1.528442e+003
4.811287e+001	1.528442e+003
4.816055e+001	1.538084e+003
4.820824e+001	1.508157e+003
4.825592e+001	1.508157e+003
4.830361e+001	1.446000e+003
4.835129e+001	1.405299e+003
4.839897e+001	1.405299e+003
4.844666e+001	1.545751e+003
4.849434e+001	1.545751e+003
4.854202e+001	1.528905e+003
4.858971e+001	1.528905e+003
4.863739e+001	1.528905e+003
4.868507e+001	1.610156e+003
4.873276e+001	1.513783e+003
4.878044e+001	1.622013e+003
4.882813e+001	1.635149e+003
4.887581e+001	1.635149e+003
4.892349e+001	1.557173e+003
4.897118e+001	1.411434e+003
4.901886e+001	1.368297e+003
4.906654e+001	1.368297e+003
4.911423e+001	1.397134e+003
4.916191e+001	1.467533e+003
4.920959e+001	1.455642e+003
4.925728e+001	1.468045e+003
4.930496e+001	1.455642e+003
4.935264e+001	1.378044e+003
4.940033e+001	1.378044e+003
4.944801e+001	1.397412e+003
4.949570e+001	1.489617e+003
4.954338e+001	1.491824e+003
4.959106e+001	1.491824e+003
4.963875e+001	1.545552e+003
4.968643e+001	1.539703e+003
4.973412e+001	1.569040e+003
4.978180e+001	1.539703e+003
4.982948e+001	1.465572e+003
4.987717e+001	1.465572e+003
4.992485e+001	1.587232e+003
4.997254e+001	1.587232e+003
5.002022e+001	1.457143e+003
5.006790e+001	1.447198e+003
5.011559e+001	1.364616e+003
5.016327e+001	1.364616e+003
5.021095e+001	1.364616e+003
5.025864e+001	1.374902e+003
5.030632e+001	1.468606e+003
5.035400e+001	1.468606e+003
5.040169e+001	1.358729e+003
5.044937e+001	1.330634e+003
5.049705e+001	1.330634e+003
5.054474e+001	1.410710e+003
5.059242e+001	1.493912e+003
5.064011e+001	1.493912e+003
5.068779e+001	1.493912e+003
5.073547e+001	1.506071e+003
5.078316e+001	1.330372e+003
5.083084e+001	1.532654e+003
5.087852e+001	1.406461e+003
5.092621e+001	1.406461e+003
5.097389e+001	1.406461e+003
5.102157e+001	1.404914e+003
5.106926e+001	1.504879e+003
5.111695e+001	1.438570e+003
5.116463e+001	1.504879e+003
5.121231e+001	1.510282e+003
5.126000e+001	1.510282e+003
5.130768e+001	1.464983e+003
5.135536e+001	1.464983e+003
5.140305e+001	1.544211e+003
5.145073e+001	1.544211e+003
5.149841e+001	1.506259e+003
5.154610e+001	1.383814e+003
5.159378e+001	1.506259e+003
5.164146e+001	1.549744e+003
5.168915e+001	1.549744e+003
5.173683e+001	1.469051e+003
5.178452e+001	1.425760e+003
5.183220e+001	1.469051e+003
5.187988e+001	1.407442e+003
5.192757e+001	1.374250e+003
5.197525e+001	1.369432e+003
5.202293e+001	1.369432e+003
5.207062e+001	1.453651e+003
5.211830e+001	1.453651e+003
5.216598e+001	1.437686e+003
5.221367e+001	1.437686e+003
5.226135e+001	1.332935e+003
5.230904e+001	1.406908e+003
5.235672e+001	1.396562e+003
5.240440e+001	1.406908e+003
5.245209e+001	1.396562e+003
5.249977e+001	1.497176e+003
5.254745e+001	1.381894e+003
5.259514e+001	1.448379e+003
5.264282e+001	1.448379e+003
5.269051e+001	1.458098e+003
5.273819e+001	1.458098e+003
5.278588e+001	1.468039e+003
5.283356e+001	1.497810e+003
5.288124e+001	1.497810e+003
5.292893e+001	1.497810e+003
5.297661e+001	1.470752e+003
5.302429e+001	1.477459e+003
5.307198e+001	1.477459e+003
5.311966e+001	1.519390e+003
5.316734e+001	1.519390e+003
5.321503e+001	1.482510e+003
5.326271e+001	1.427888e+003
5.331039e+001	1.367868e+003
5.335808e+001	1.367868e+003
5.340576e+001	1.497476e+003
5.345345e+001	1.519688e+003
5.350113e+001	1.519688e+003
5.354881e+001	1.519688e+003
5.359650e+001	1.496452e+003
5.364418e+001	1.442611e+003
5.369186e+001	1.361963e+003
5.373955e+001	1.336225e+003
5.378723e+001	1.336225e+003
5.383491e+001	1.594091e+003
5.388260e+001	1.597250e+003
5.393028e+001	1.597250e+003
5.397796e+001	1.574899e+003
5.402565e+001	1.574899e+003
5.407333e+001	1.533813e+003
5.412102e+001	1.660046e+003
5.416870e+001	1.533813e+003
5.421639e+001	1.429636e+003
5.426407e+001	1.429636e+003
5.431175e+001	1.498949e+003
5.435944e+001	1.498949e+003
5.440712e+001	1.534966e+003
5.445480e+001	1.534966e+003
5.450249e+001	1.534966e+003
5.455017e+001	1.412276e+003
5.459786e+001	1.412276e+003
5.464554e+001	1.448761e+003
5.469322e+001	1.448761e+003
5.474091e+001	1.319564e+003
5.478859e+001	1.319564e+003
5.483627e+001	1.437672e+003
5.488396e+001	1.506815e+003
5.493164e+001	1.518858e+003
5.497932e+001	1.594713e+003
5.502701e+001	1.518858e+003
5.507469e+001	1.399408e+003
5.512237e+001	1.306981e+003
5.517006e+001	1.306981e+003
5.521774e+001	1.303341e+003
5.526543e+001	1.407506e+003
5.531311e+001	1.536067e+003
5.536079e+001	1.563392e+003
5.540848e+001	1.536067e+003
5.545616e+001	1.503235e+003
5.550384e+001	1.497049e+003
5.555153e+001	1.359971e+003
5.559921e+001	1.497049e+003
5.564689e+001	1.529834e+003
5.569458e+001	1.529834e+003
5.574227e+001	1.528008e+003
5.578995e+001	1.528008e+003
5.583763e+001	1.496298e+003
5.588532e+001	1.430629e+003
5.593300e+001	1.430629e+003
5.598068e+001	1.407206e+003
5.602837e+001	1.317173e+003
5.607605e+001	1.317173e+003
5.612373e+001	1.438824e+003
5.617142e+001	1.469283e+003
5.621910e+001	1.469283e+003
5.626679e+001	1.358175e+003
5.631447e+001	1.358175e+003
5.636215e+001	1.391578e+003
5.640984e+001	1.408524e+003
5.645752e+001	1.391578e+003
5.650520e+001	1.540545e+003
5.655289e+001	1.450472e+003
5.660057e+001	1.450472e+003
5.664825e+001	1.433081e+003
5.669594e+001	1.433081e+003
5.674362e+001	1.434946e+003
5.679130e+001	1.434946e+003
5.683899e+001	1.434946e+003
5.688667e+001	1.439807e+003
5.693436e+001	1.439807e+003
5.698204e+001	1.439807e+003
5.702972e+001	1.442569e+003
5.707741e+001	1.447780e+003
5.712509e+001	1.460122e+003
5.717277e+001	1.537163e+003
5.722046e+001	1.537163e+003
5.726814e+001	1.541567e+003
5.731583e+001	1.541567e+003
5.736351e+001	1.541567e+003
5.741120e+001	1.432260e+003
5.745888e+001	1.373192e+003
5.750656e+001	1.432197e+003
5.755425e+001	1.401791e+003
5.760193e+001	1.401791e+003
5.764961e+001	1.401791e+003
5.769730e+001	1.523708e+003
5.774498e+001	1.523708e+003
5.779266e+001	1.399808e+003
5.784035e+001	1.399808e+003
5.788803e+001	1.500078e+003
5.793571e+001	1.500078e+003
5.798340e+001	1.488390e+003
5.803108e+001	1.365412e+003
5.807877e+001	1.365412e+003
5.812645e+001	1.585055e+003
5.817413e+001	1.585319e+003
5.822182e+001	1.679638e+003
5.826950e+001	1.679638e+003
5.831718e+001	1.335949e+003
5.836487e+001	1.335949e+003
5.841255e+001	1.407504e+003
5.846023e+001	1.407504e+003
5.850792e+001	1.450892e+003
5.855560e+001	1.450892e+003
5.860329e+001	1.462680e+003
5.865097e+001	1.462680e+003
5.869865e+001	1.369556e+003
5.874634e+001	1.369556e+003
5.879402e+001	1.397454e+003
5.884171e+001	1.458321e+003
5.888939e+001	1.483233e+003
5.893707e+001	1.483233e+003
5.898476e+001	1.363212e+003
5.903244e+001	1.363212e+003
5.908013e+001	1.363212e+003
5.912781e+001	1.388096e+003
5.917549e+001	1.388096e+003
5.922318e+001	1.388096e+003
5.927086e+001	1.359618e+003
5.931854e+001	1.359618e+003
5.936623e+001	1.311197e+003
5.941391e+001	1.532576e+003
5.946159e+001	1.310825e+003
5.950928e+001	1.532576e+003
5.955696e+001	1.492026e+003
5.960464e+001	1.533532e+003
5.965233e+001	1.528886e+003
5.970001e+001	1.528886e+003
5.974770e+001	1.502469e+003
5.979538e+001	1.502469e+003
5.984306e+001	1.607405e+003
5.989075e+001	1.607405e+003
5.993843e+001	1.588518e+003
5.998611e+001	1.557221e+003
6.003380e+001	1.557221e+003
6.008148e+001	1.448680e+003
6.012916e+001	1.448680e+003
6.017685e+001	1.448680e+003
6.022453e+001	1.478352e+003
6.027222e+001	1.470525e+003
6.031990e+001	1.631678e+003
6.036759e+001	1.567716e+003
6.041527e+001	1.567716e+003
6.046295e+001	1.402833e+003
6.051064e+001	1.402833e+003
6.055832e+001	1.443011e+003
6.060600e+001	1.443011e+003
6.065369e+001	1.393202e+003
6.070137e+001	1.393202e+003
6.074905e+001	1.393202e+003
6.079674e+001	1.421931e+003
6.084442e+001	1.423761e+003
6.089211e+001	1.425487e+003
6.093979e+001	1.553503e+003
6.098747e+001	1.553503e+003
6.103516e+001	1.393849e+003
6.108284e+001	1.393849e+003
6.113052e+001	1.358406e+003
6.117821e+001	1.424524e+003
6.122589e+001	1.424524e+003
6.127357e+001	1.424524e+003
6.132126e+001	1.512037e+003
6.136894e+001	1.412789e+003
6.141663e+001	1.543012e+003
6.146431e+001	1.437284e+003
6.151199e+001	1.437284e+003
6.155968e+001	1.437284e+003
6.160736e+001	1.477964e+003
6.165504e+001	1.477964e+003
6.170273e+001	1.455706e+003
6.175041e+001	1.433068e+003
6.179809e+001	1.433068e+003
6.184578e+001	1.480371e+003
6.189346e+001	1.480371e+003
6.194115e+001	1.480371e+003
6.198883e+001	1.489160e+003
6.203652e+001	1.589737e+003
6.208420e+001	1.489160e+003
6.213188e+001	1.485118e+003
6.217957e+001	1.475467e+003
6.222725e+001	1.485118e+003
6.227493e+001	1.475467e+003
6.232262e+001	1.578662e+003
6.237030e+001	1.444184e+003
6.241798e+001	1.375570e+003
6.246567e+001	1.375570e+003
6.251335e+001	1.421368e+003
6.256104e+001	1.421368e+003
6.260872e+001	1.414814e+003
6.265640e+001	1.292176e+003
6.270409e+001	1.292176e+003
6.275177e+001	1.463128e+003
6.279945e+001	1.463128e+003
6.284714e+001	1.387612e+003
6.289482e+001	1.387612e+003
6.294250e+001	1.457748e+003
6.299019e+001	1.473055e+003
6.303787e+001	1.457748e+003
6.308555e+001	1.422121e+003
6.313324e+001	1.422121e+003
6.318092e+001	1.422121e+003
6.322861e+001	1.373944e+003
6.327629e+001	1.309670e+003
6.332398e+001	1.289985e+003
6.337166e+001	1.289985e+003
6.341934e+001	1.289985e+003
6.346703e+001	1.421362e+003
6.351471e+001	1.500300e+003
6.356239e+001	1.500300e+003
6.361008e+001	1.500300e+003
6.365776e+001	1.523674e+003
6.370545e+001	1.523674e+003
6.375313e+001	1.537627e+003
6.380081e+001	1.513388e+003
6.384850e+001	1.409017e+003
6.389618e+001	1.405977e+003
6.394386e+001	1.409017e+003
6.399155e+001	1.421212e+003
6.403923e+001	1.421212e+003
6.408691e+001	1.280554e+003
6.413460e+001	1.280554e+003
6.418228e+001	1.462072e+003
6.422996e+001	1.488856e+003
6.427765e+001	1.488856e+003
6.432533e+001	1.488856e+003
6.437302e+001	1.453111e+003
6.442070e+001	1.423466e+003
6.446838e+001	1.423466e+003
6.451607e+001	1.453599e+003
6.456375e+001	1.453855e+003
6.461143e+001	1.458938e+003
6.465912e+001	1.458938e+003
6.470680e+001	1.458938e+003
6.475448e+001	1.393498e+003
6.480217e+001	1.358616e+003
6.484985e+001	1.358616e+003
6.489754e+001	1.452048e+003
6.494522e+001	1.452048e+003
6.499291e+001	1.375640e+003
6.504059e+001	1.364789e+003
6.508827e+001	1.362607e+003
6.513596e+001	1.298006e+003
6.518364e+001	1.362607e+003
6.523132e+001	1.340668e+003
6.527901e+001	1.420107e+003
6.532669e+001	1.420107e+003
6.537438e+001	1.494522e+003
6.542206e+001	1.533170e+003
6.546974e+001	1.533170e+003
6.551743e+001	1.487610e+003
6.556511e+001	1.392822e+003
6.561280e+001	1.384907e+003
6.566048e+001	1.363438e+003
6.570816e+001	1.354064e+003
6.575584e+001	1.354064e+003
6.580353e+001	1.346710e+003
6.585121e+001	1.362598e+003
6.589890e+001	1.364156e+003
6.594658e+001	1.370766e+003
6.599427e+001	1.396929e+003
6.604195e+001	1.396929e+003
6.608963e+001	1.379767e+003
6.613731e+001	1.379250e+003
6.618500e+001	1.379767e+003
6.623268e+001	1.432248e+003
6.628037e+001	1.447442e+003
6.632805e+001	1.568220e+003
6.637573e+001	1.568220e+003
6.642341e+001	1.568220e+003
6.647110e+001	1.399703e+003
6.651878e+001	1.399703e+003
6.656647e+001	1.429466e+003
6.661415e+001	1.547357e+003
6.666184e+001	1.547357e+003
6.670952e+001	1.316722e+003
6.675720e+001	1.254379e+003
6.680488e+001	1.316722e+003
6.685257e+001	1.334323e+003
6.690025e+001	1.410356e+003
6.694794e+001	1.334323e+003
6.699562e+001	1.342837e+003
6.704330e+001	1.342837e+003
6.709098e+001	1.342837e+003
6.713867e+001	1.466678e+003
6.718636e+001	1.382125e+003
6.723404e+001	1.404103e+003
6.728173e+001	1.404103e+003
6.732941e+001	1.404103e+003
6.737709e+001	1.470972e+003
6.742477e+001	1.400123e+003
6.747246e+001	1.324858e+003
6.752014e+001	1.324858e+003
6.756783e+001	1.387940e+003
6.761551e+001	1.387940e+003
6.766320e+001	1.448688e+003
6.771088e+001	1.448688e+003
6.775856e+001	1.479862e+003
6.780624e+001	1.500880e+003
6.785393e+001	1.522561e+003
6.790161e+001	1.522561e+003
6.794930e+001	1.504508e+003
6.799698e+001	1.485574e+003
6.804466e+001	1.504508e+003
6.809234e+001	1.545320e+003
6.814003e+001	1.545320e+003
6.818771e+001	1.471867e+003
6.823540e+001	1.314419e+003
6.828308e+001	1.314419e+003
6.833077e+001	1.329178e+003
6.837845e+001	1.374806e+003
6.842613e+001	1.433550e+003
6.847381e+001	1.598899e+003
6.852150e+001	1.598899e+003
6.856918e+001	1.598899e+003
6.861687e+001	1.427883e+003
6.866455e+001	1.427883e+003
6.871223e+001	1.427883e+003
6.875992e+001	1.449468e+003
6.880760e+001	1.427972e+003
6.885529e+001	1.455192e+003
6.890297e+001	1.427972e+003
6.895066e+001	1.455192e+003
6.899834e+001	1.443975e+003
6.904602e+001	1.443975e+003
6.909370e+001	1.364443e+003
6.914139e+001	1.364443e+003
6.918907e+001	1.442068e+003
6.923676e+001	1.442068e+003
6.928444e+001	1.442068e+003
6.933213e+001	1.571846e+003
6.937980e+001	1.571846e+003
6.942749e+001	1.518144e+003
6.947517e+001	1.415653e+003
6.952286e+001	1.350525e+003
6.957054e+001	1.334553e+003
6.961823e+001	1.350525e+003
6.966591e+001	1.354591e+003
6.971359e+001	1.490138e+003
6.976127e+001	1.474388e+003
6.980896e+001	1.474388e+003
6.985664e+001	1.383659e+003
6.990433e+001	1.383659e+003
6.995201e+001	1.388100e+003
6.999970e+001	1.388100e+003
7.004738e+001	1.379814e+003
7.009506e+001	1.360054e+003
7.014274e+001	1.354652e+003
7.019043e+001	1.354652e+003
7.023812e+001	1.393049e+003
7.028580e+001	1.553449e+003
7.033348e+001	1.553449e+003
7.038116e+001	1.504053e+003
7.042885e+001	1.337870e+003
7.047653e+001	1.481819e+003
7.052422e+001	1.370884e+003
7.057190e+001	1.481819e+003
7.061959e+001	1.399898e+003
7.066727e+001	1.490087e+003
7.071495e+001	1.439571e+003
7.076263e+001	1.439571e+003
7.081032e+001	1.439571e+003
7.085800e+001	1.464613e+003
7.090569e+001	1.478935e+003
7.095337e+001	1.478935e+003
7.100105e+001	1.426194e+003
7.104873e+001	1.396241e+003
7.109642e+001	1.327917e+003
7.114410e+001	1.321209e+003
7.119179e+001	1.321209e+003
7.123947e+001	1.210958e+003
7.128716e+001	1.374385e+003
7.133484e+001	1.217813e+003
7.138252e+001	1.353011e+003
7.143020e+001	1.353011e+003
7.147789e+001	1.554437e+003
7.152557e+001	1.554437e+003
7.157326e+001	1.554437e+003
7.162094e+001	1.536173e+003
7.166863e+001	1.490417e+003
7.171631e+001	1.490417e+003
7.176399e+001	1.499819e+003
7.181168e+001	1.499819e+003
7.185936e+001	1.348249e+003
7.190705e+001	1.321453e+003
7.195473e+001	1.321453e+003
7.200241e+001	1.356421e+003
7.205009e+001	1.356421e+003
7.209778e+001	1.356421e+003
7.214546e+001	1.314221e+003
7.219315e+001	1.371179e+003
7.224083e+001	1.441977e+003
7.228852e+001	1.473053e+003
7.233620e+001	1.473053e+003
7.238388e+001	1.319077e+003
7.243156e+001	1.319077e+003
7.247925e+001	1.324902e+003
7.252693e+001	1.334228e+003
7.257462e+001	1.414846e+003
7.262230e+001	1.510797e+003
7.266998e+001	1.449769e+003
7.271766e+001	1.449769e+003
7.276535e+001	1.449769e+003
7.281303e+001	1.547857e+003
7.286072e+001	1.547857e+003
7.290840e+001	1.460239e+003
7.295609e+001	1.376709e+003
7.300377e+001	1.383118e+003
7.305145e+001	1.383118e+003
7.309913e+001	1.460727e+003
7.314682e+001	1.460727e+003
7.319450e+001	1.424238e+003
7.324219e+001	1.352276e+003
7.328987e+001	1.352219e+003
7.333755e+001	1.352276e+003
7.338524e+001	1.421775e+003
7.343292e+001	1.486580e+003
7.348061e+001	1.486580e+003
7.352829e+001	1.345311e+003
7.357598e+001	1.345311e+003
7.362366e+001	1.385402e+003
7.367134e+001	1.385402e+003
7.371902e+001	1.446916e+003
7.376671e+001	1.316315e+003
7.381439e+001	1.351399e+003
7.386208e+001	1.351249e+003
7.390976e+001	1.351399e+003
7.395745e+001	1.351249e+003
7.400513e+001	1.380229e+003
7.405281e+001	1.380229e+003
7.410049e+001	1.380229e+003
7.414818e+001	1.411016e+003
7.419586e+001	1.391479e+003
7.424355e+001	1.411016e+003
7.429123e+001	1.391479e+003
7.433891e+001	1.386975e+003
7.438659e+001	1.313016e+003
7.443428e+001	1.311552e+003
7.448196e+001	1.267529e+003
7.452965e+001	1.267529e+003
7.457733e+001	1.331073e+003
7.462502e+001	1.416371e+003
7.467270e+001	1.416371e+003
7.472038e+001	1.520627e+003
7.476806e+001	1.560463e+003
7.481575e+001	1.560463e+003
7.486344e+001	1.575419e+003
7.491112e+001	1.381340e+003
7.495880e+001	1.560421e+003
7.500648e+001	1.560421e+003
7.505417e+001	1.560421e+003
7.510185e+001	1.507491e+003
7.514954e+001	1.428941e+003
7.519722e+001	1.428941e+003
7.524491e+001	1.573946e+003
7.529259e+001	1.585710e+003
7.534027e+001	1.573946e+003
7.538795e+001	1.403612e+003
7.543564e+001	1.397456e+003
7.548332e+001	1.397456e+003
7.553101e+001	1.397456e+003
7.557869e+001	1.400719e+003
7.562637e+001	1.505590e+003
7.567405e+001	1.561904e+003
7.572174e+001	1.561904e+003
7.576942e+001	1.558511e+003
7.581711e+001	1.414232e+003
7.586479e+001	1.351734e+003
7.591248e+001	1.351734e+003
7.596016e+001	1.381103e+003
7.600784e+001	1.381103e+003
7.605552e+001	1.381103e+003
7.610321e+001	1.492133e+003
7.615089e+001	1.616418e+003
7.619858e+001	1.497703e+003
7.624626e+001	1.497703e+003
7.629395e+001	1.491210e+003
7.634163e+001	1.426310e+003
7.638931e+001	1.380774e+003
7.643700e+001	1.380774e+003
7.648468e+001	1.406116e+003
7.653237e+001	1.418074e+003
7.658005e+001	1.471294e+003
7.662773e+001	1.471294e+003
7.667541e+001	1.340730e+003
7.672310e+001	1.283968e+003
7.677078e+001	1.283968e+003
7.681847e+001	1.389862e+003
7.686615e+001	1.389862e+003
7.691384e+001	1.351992e+003
7.696152e+001	1.345996e+003
7.700920e+001	1.345996e+003
7.705688e+001	1.363118e+003
7.710457e+001	1.450663e+003
7.715225e+001	1.450663e+003
7.719994e+001	1.472351e+003
7.724762e+001	1.397658e+003
7.729530e+001	1.397658e+003
7.734298e+001	1.397658e+003
7.739067e+001	1.515898e+003
7.743835e+001	1.515898e+003
7.748604e+001	1.504813e+003
7.753372e+001	1.504813e+003
7.758141e+001	1.492319e+003
7.762909e+001	1.492319e+003
7.767677e+001	1.372297e+003
7.772445e+001	1.329184e+003
7.777214e+001	1.309166e+003
7.781983e+001	1.309166e+003
7.786751e+001	1.373672e+003
7.791520e+001	1.407998e+003
7.796287e+001	1.422074e+003
7.801056e+001	1.422074e+003
7.805824e+001	1.659093e+003
7.810593e+001	3.262076e+003
7.815361e+001	3.262076e+003
7.820130e+001	1.613955e+003
7.824898e+001	1.597419e+003
7.829666e+001	1.592727e+003
7.834434e+001	1.315935e+003
7.839203e+001	1.308691e+003
7.843971e+001	1.308691e+003
7.848740e+001	1.361622e+003
7.853508e+001	1.361622e+003
7.858277e+001	1.361622e+003
7.863045e+001	1.574311e+003
7.867813e+001	1.574311e+003
7.872581e+001	1.569911e+003
7.877350e+001	1.413653e+003
7.882118e+001	1.413653e+003
7.886887e+001	1.407744e+003
7.891655e+001	1.407744e+003
7.896423e+001	1.429833e+003
7.901191e+001	1.661127e+003
7.905960e+001	1.661127e+003
7.910728e+001	1.435003e+003
7.915497e+001	1.435003e+003
7.920265e+001	1.450052e+003
7.925034e+001	1.546440e+003
7.929802e+001	1.450052e+003
7.934570e+001	1.460127e+003
7.939339e+001	1.423810e+003
7.944107e+001	1.460127e+003
7.948876e+001	1.423810e+003
7.953644e+001	1.539074e+003
7.958413e+001	1.464316e+003
7.963180e+001	1.464316e+003
7.967949e+001	1.426293e+003
7.972717e+001	1.329874e+003
7.977486e+001	1.329874e+003
7.982254e+001	1.383790e+003
7.987023e+001	1.383790e+003
7.991791e+001	1.364354e+003
7.996559e+001	1.364354e+003
8.001327e+001	1.348043e+003
8.006096e+001	1.333516e+003
8.010864e+001	1.333516e+003
8.015633e+001	1.371351e+003
8.020401e+001	1.420337e+003
8.025170e+001	1.509007e+003
8.029937e+001	1.509007e+003
8.034706e+001	1.509007e+003
8.039474e+001	1.467424e+003
8.044243e+001	1.467424e+003
8.049011e+001	1.327236e+003
8.053780e+001	1.327236e+003
8.058548e+001	1.419315e+003
8.063316e+001	1.524795e+003
8.068084e+001	1.533845e+003
8.072853e+001	1.533845e+003
8.077621e+001	1.533845e+003
8.082390e+001	1.414396e+003
8.087158e+001	1.441896e+003
8.091927e+001	1.414396e+003
8.096695e+001	1.370255e+003
8.101463e+001	1.330312e+003
8.106232e+001	1.330312e+003
8.111000e+001	1.330312e+003
8.115769e+001	1.425402e+003
8.120537e+001	1.483131e+003
8.125305e+001	1.483155e+003
8.130073e+001	1.508852e+003
8.134842e+001	1.539328e+003
8.139610e+001	1.508852e+003
8.144379e+001	1.539328e+003
8.149147e+001	1.422895e+003
8.153916e+001	1.438805e+003
8.158684e+001	1.422895e+003
8.163452e+001	1.438805e+003
8.168220e+001	1.374651e+003
8.172989e+001	1.473922e+003
8.177757e+001	1.383551e+003
8.182526e+001	1.474423e+003
8.187294e+001	1.383551e+003
8.192063e+001	1.423594e+003
8.196830e+001	1.320475e+003
8.201599e+001	1.423594e+003
8.206367e+001	1.320475e+003
8.211136e+001	1.440386e+003
8.215904e+001	1.440386e+003
8.220673e+001	1.440386e+003
8.225441e+001	1.191222e+003
8.230209e+001	1.191222e+003
8.234977e+001	1.355779e+003
8.239746e+001	1.395293e+003
8.244515e+001	1.355779e+003
8.249283e+001	1.416761e+003
8.254052e+001	1.300072e+003
8.258820e+001	1.300072e+003
8.263588e+001	1.300072e+003
8.268356e+001	1.336165e+003
8.273125e+001	1.368202e+003
8.277893e+001	1.396682e+003
8.282662e+001	1.396682e+003
8.287430e+001	1.300902e+003
8.292198e+001	1.300902e+003
8.296966e+001	1.349086e+003
8.301735e+001	1.429052e+003
8.306503e+001	1.349086e+003
8.311272e+001	1.335232e+003
8.316040e+001	1.335232e+003
8.320809e+001	1.417668e+003
8.325577e+001	1.484479e+003
8.330345e+001	1.417668e+003
8.335113e+001	1.368218e+003
8.339882e+001	1.368218e+003
8.344650e+001	1.430270e+003
8.349419e+001	1.430270e+003
8.354187e+001	1.341734e+003
8.358955e+001	1.341734e+003
8.363723e+001	1.406758e+003
8.368492e+001	1.551446e+003
8.373260e+001	1.551446e+003
8.378029e+001	1.511438e+003
8.382797e+001	1.453303e+003
8.387566e+001	1.363774e+003
8.392334e+001	1.338679e+003
8.397102e+001	1.338679e+003
8.401871e+001	1.507662e+003
8.406639e+001	1.507662e+003
8.411408e+001	1.408659e+003
8.416176e+001	1.408659e+003
8.420945e+001	1.356483e+003
8.425713e+001	1.348538e+003
8.430481e+001	1.348538e+003
8.435249e+001	1.449022e+003
8.440018e+001	1.449022e+003
8.444786e+001	1.439561e+003
8.449555e+001	1.280624e+003
8.454323e+001	1.280624e+003
8.459091e+001	1.389151e+003
8.463859e+001	1.494246e+003
8.468628e+001	1.465568e+003
8.473396e+001	1.465568e+003
8.478165e+001	1.434782e+003
8.482933e+001	1.393224e+003
8.487702e+001	1.393224e+003
8.492470e+001	1.350480e+003
8.497238e+001	1.350480e+003
8.502006e+001	1.480350e+003
8.506775e+001	1.480350e+003
8.511543e+001	1.528907e+003
8.516312e+001	1.420723e+003
8.521080e+001	1.528907e+003
8.525848e+001	1.528654e+003
8.530616e+001	1.528654e+003
8.535385e+001	1.528654e+003
8.540153e+001	1.454109e+003
8.544922e+001	1.454109e+003
8.549691e+001	1.384280e+003
8.554459e+001	1.384280e+003
8.559227e+001	1.363845e+003
8.563995e+001	1.363845e+003
8.568764e+001	1.356972e+003
8.573532e+001	1.356972e+003
8.578301e+001	1.358649e+003
8.583069e+001	1.419320e+003
8.587838e+001	1.432185e+003
8.592605e+001	1.432185e+003
8.597374e+001	1.408423e+003
8.602142e+001	1.347329e+003
8.606911e+001	1.408423e+003
8.611679e+001	1.358534e+003
8.616448e+001	1.370106e+003
8.621216e+001	1.370106e+003
8.625984e+001	1.398676e+003
8.630752e+001	1.464727e+003
8.635521e+001	1.464727e+003
8.640289e+001	1.464727e+003
8.645058e+001	1.371409e+003
8.649826e+001	1.371409e+003
8.654595e+001	1.434406e+003
8.659363e+001	1.450089e+003
8.664131e+001	1.434406e+003
8.668899e+001	1.450089e+003
8.673668e+001	1.538647e+003
8.678436e+001	1.538647e+003
8.683205e+001	1.513781e+003
8.687973e+001	1.438657e+003
8.692741e+001	1.402600e+003
8.697509e+001	1.373193e+003
8.702278e+001	1.373193e+003
8.707047e+001	1.412599e+003
8.711815e+001	1.482756e+003
8.716584e+001	1.482756e+003
8.721352e+001	1.446619e+003
8.726120e+001	1.413764e+003
8.730888e+001	1.413764e+003
8.735657e+001	1.413764e+003
8.740425e+001	1.425050e+003
8.745194e+001	1.425050e+003
8.749962e+001	1.477016e+003
8.754730e+001	1.477016e+003
8.759498e+001	1.540915e+003
8.764267e+001	1.513486e+003
8.769035e+001	1.523321e+003
8.773804e+001	1.513486e+003
8.778572e+001	1.385530e+003
8.783341e+001	1.385530e+003
8.788109e+001	1.546624e+003
8.792877e+001	1.546624e+003
8.797645e+001	1.302946e+003
8.802414e+001	1.302946e+003
8.807182e+001	1.302946e+003
8.811951e+001	1.423525e+003
8.816719e+001	1.322675e+003
8.821488e+001	1.322675e+003
8.826255e+001	1.322675e+003
8.831024e+001	1.348016e+003
8.835792e+001	1.460717e+003
8.840561e+001	1.460717e+003
8.845329e+001	1.455695e+003
8.850098e+001	1.422814e+003
8.854866e+001	1.422814e+003
8.859634e+001	1.422814e+003
8.864403e+001	1.458624e+003
8.869171e+001	1.458624e+003
8.873940e+001	1.458624e+003
8.878708e+001	1.522244e+003
8.883477e+001	1.522244e+003
8.888245e+001	1.496574e+003
8.893013e+001	1.411237e+003
8.897781e+001	1.411237e+003
8.902550e+001	1.411237e+003
8.907318e+001	1.428278e+003
8.912087e+001	1.428278e+003
8.916855e+001	1.406281e+003
8.921623e+001	1.396996e+003
8.926391e+001	1.396996e+003
8.931160e+001	1.369242e+003
8.935928e+001	1.443961e+003
8.940697e+001	1.369242e+003
8.945465e+001	1.444984e+003
8.950234e+001	1.444984e+003
8.955002e+001	1.444984e+003
8.959770e+001	1.437119e+003
8.964538e+001	1.437119e+003
8.969307e+001	1.496776e+003
8.974075e+001	1.496776e+003
8.978844e+001	1.570777e+003
8.983612e+001	1.414697e+003
8.988380e+001	1.421450e+003
8.993148e+001	1.421450e+003
8.997917e+001	1.421450e+003
9.002686e+001	1.374225e+003
9.007454e+001	1.374225e+003
9.012223e+001	1.375068e+003
9.016991e+001	1.407750e+003
9.021759e+001	1.407750e+003
9.026527e+001	1.471188e+003
9.031296e+001	1.471188e+003
9.036064e+001	1.351398e+003
9.040833e+001	1.284341e+003
9.045601e+001	1.284341e+003
9.050370e+001	1.341029e+003
9.055138e+001	1.354981e+003
9.059906e+001	1.403717e+003
9.064674e+001	1.403717e+003
9.069443e+001	1.543473e+003
9.074211e+001	1.543473e+003
9.078980e+001	1.385575e+003
9.083748e+001	1.385575e+003
9.088516e+001	1.444714e+003
9.093284e+001	1.444714e+003
9.098053e+001	1.500268e+003
9.102821e+001	1.402375e+003
9.107590e+001	1.402375e+003
9.112358e+001	1.402375e+003
9.117127e+001	1.331184e+003
9.121895e+001	1.400905e+003
9.126663e+001	1.331184e+003
9.131431e+001	1.400905e+003
9.136200e+001	1.421873e+003
9.140968e+001	1.461892e+003
9.145737e+001	1.421873e+003
9.150505e+001	1.375020e+003
9.155273e+001	1.375020e+003
9.160042e+001	1.444636e+003
9.164810e+001	1.444636e+003
9.169579e+001	1.444584e+003
9.174347e+001	1.444584e+003
9.179116e+001	1.440577e+003
9.183884e+001	1.408183e+003
9.188652e+001	1.332526e+003
9.193420e+001	1.332526e+003
9.198189e+001	1.246113e+003
9.202957e+001	1.333025e+003
9.207726e+001	1.449760e+003
9.212494e+001	1.449760e+003
9.217262e+001	1.523217e+003
9.222030e+001	1.457754e+003
9.226799e+001	1.501318e+003
9.231567e+001	1.481153e+003
9.236336e+001	1.501318e+003
9.241104e+001	1.534818e+003
9.245873e+001	1.534818e+003
9.250641e+001	1.465098e+003
9.255409e+001	1.374542e+003
9.260177e+001	1.450677e+003
9.264946e+001	1.374542e+003
9.269714e+001	1.350823e+003
9.274483e+001	1.350823e+003
9.279251e+001	1.405003e+003
9.284020e+001	1.405003e+003
9.288788e+001	1.405003e+003
9.293556e+001	1.291575e+003
9.298324e+001	1.484391e+003
9.303093e+001	1.436635e+003
9.307861e+001	1.484391e+003
9.312630e+001	1.436635e+003
9.317398e+001	1.607579e+003
9.322166e+001	1.354534e+003
9.326935e+001	1.343227e+003
9.331703e+001	1.343227e+003
9.336472e+001	1.540289e+003
9.341240e+001	1.540289e+003
9.346009e+001	1.318964e+003
9.350777e+001	1.318964e+003
9.355545e+001	1.354324e+003
9.360313e+001	1.354324e+003
9.365082e+001	1.354324e+003
9.369850e+001	1.424911e+003
9.374619e+001	1.424911e+003
9.379387e+001	1.424911e+003
9.384155e+001	1.441458e+003
9.388923e+001	1.464778e+003
9.393692e+001	1.441458e+003
9.398460e+001	1.410662e+003
9.403229e+001	1.410662e+003
9.407997e+001	1.452003e+003
9.412766e+001	1.452003e+003
9.417534e+001	1.437615e+003
9.422302e+001	1.403195e+003
9.427070e+001	1.437615e+003
9.431839e+001	1.465317e+003
9.436607e+001	1.465317e+003
9.441376e+001	1.465317e+003
9.446144e+001	1.406102e+003
9.450912e+001	1.384382e+003
9.455680e+001	1.384382e+003
9.460449e+001	1.491550e+003
9.465218e+001	1.491550e+003
9.469986e+001	1.452281e+003
9.474755e+001	1.274818e+003
9.479523e+001	1.338921e+003
9.484291e+001	1.338921e+003
9.489059e+001	1.338921e+003
9.493828e+001	1.480432e+003
9.498596e+001	1.251304e+003
9.503365e+001	1.480432e+003
9.508133e+001	1.521028e+003
9.512902e+001	1.521028e+003
9.517670e+001	1.521028e+003
9.522438e+001	1.496516e+003
9.527206e+001	1.415210e+003
9.531975e+001	1.415210e+003
9.536743e+001	1.431068e+003
9.541512e+001	1.533997e+003
9.546280e+001	1.533997e+003
9.551048e+001	1.483114e+003
9.555816e+001	1.377231e+003
9.560585e+001	1.377231e+003
9.565353e+001	1.385953e+003
9.570122e+001	1.437457e+003
9.574890e+001	1.478690e+003
9.579659e+001	1.478690e+003
9.584427e+001	1.469982e+003
9.589195e+001	1.469982e+003
9.593963e+001	1.455259e+003
9.598732e+001	1.460451e+003
9.603500e+001	1.421045e+003
9.608269e+001	1.421045e+003
9.613038e+001	1.408383e+003
9.617805e+001	1.408383e+003
9.622574e+001	1.480786e+003
9.627342e+001	1.547083e+003
9.632111e+001	1.480786e+003
9.636879e+001	1.362002e+003
9.641648e+001	1.362002e+003
9.646416e+001	1.457595e+003
9.651184e+001	1.513970e+003
9.655952e+001	1.513970e+003
9.660721e+001	1.513970e+003
9.665489e+001	1.418453e+003
9.670258e+001	1.318284e+003
9.675026e+001	1.269454e+003
9.679795e+001	1.269454e+003
9.684562e+001	1.332934e+003
9.689331e+001	1.487400e+003
9.694099e+001	1.386060e+003
9.698868e+001	1.392180e+003
9.703636e+001	1.386060e+003
9.708405e+001	1.392180e+003
9.713173e+001	1.479463e+003
9.717941e+001	1.479463e+003
9.722709e+001	1.479463e+003
9.727478e+001	1.455884e+003
9.732246e+001	1.455884e+003
9.737015e+001	1.438887e+003
9.741783e+001	1.438887e+003
9.746552e+001	1.422512e+003
9.751320e+001	1.456393e+003
9.756088e+001	1.456393e+003
9.760856e+001	1.622216e+003
9.765625e+001	1.622216e+003
9.770394e+001	1.577286e+003
9.775162e+001	1.480868e+003
9.779930e+001	1.364186e+003
9.784698e+001	1.341730e+003
9.789467e+001	1.341730e+003
9.794235e+001	1.450940e+003
9.799004e+001	1.450940e+003
9.803772e+001	1.506169e+003
9.808541e+001	1.430335e+003
9.813309e+001	1.459556e+003
9.818077e+001	1.330037e+003
9.822845e+001	1.262236e+003
9.827614e+001	1.262236e+003
9.832382e+001	1.368955e+003
9.837151e+001	1.380308e+003
9.841919e+001	1.517418e+003
9.846688e+001	1.517418e+003
9.851455e+001	1.436521e+003
9.856224e+001	1.436521e+003
9.860992e+001	1.329889e+003
9.865761e+001	1.454664e+003
9.870529e+001	1.434504e+003
9.875298e+001	1.434504e+003
9.880066e+001	1.434504e+003
9.884834e+001	1.527114e+003
9.889602e+001	1.527114e+003
9.894371e+001	1.489964e+003
9.899139e+001	1.407483e+003
9.903908e+001	1.383259e+003
9.908676e+001	1.366635e+003
9.913445e+001	1.370354e+003
9.918212e+001	1.356914e+003
9.922981e+001	1.370354e+003
9.927750e+001	1.356914e+003
9.932518e+001	1.433251e+003
9.937287e+001	1.433251e+003
9.942055e+001	1.433251e+003
9.946823e+001	1.404485e+003
9.951591e+001	1.404485e+003
9.956360e+001	1.481844e+003
9.961128e+001	1.481844e+003
9.965897e+001	1.449118e+003
9.970665e+001	1.398442e+003
9.975434e+001	1.398442e+003
9.980202e+001	1.388844e+003
9.984970e+001	1.388844e+003
9.989738e+001	1.388844e+003
9.994507e+001	1.352329e+003
9.999275e+001	1.344036e+003
1.000404e+002	1.312235e+003
1.000881e+002	1.312235e+003
1.001358e+002	1.457675e+003
1.001835e+002	1.457675e+003
1.002312e+002	1.384908e+003
[truncated: 39,841 more rows]
