# Supplementary material for: Contact-free experimental determination of the static flexural spring constant of cantilever sensors using a microfluidic force tool
Source: Beilstein J Nanotechnol. 2016 Mar 30;7:492–500. doi: 10.3762/bjnano.7.43 (PMC4901535; doi:10.3762/bjnano.7.43)
Supplement: File 1 — Raw data of thermal noise spectra, cantilever deflection under fluid flow, and sensitivity values σ1. [file Beilstein_J_Nanotechnol-07-492-s001.zip › Supporting information and raw data/Tap150A-1-chip6_perpg2_h100_ch100_offset0_pvsPD.lvm]

	0.039144	-0.065060
	0.039144	-0.065066
	0.039144	-0.065083
	0.039144	-0.065066
	0.039144	-0.065084
	0.039144	-0.065045
	0.039144	-0.065088
	0.039144	-0.065115
	0.039144	-0.065109
	0.039144	-0.065082
	0.039144	-0.065064
	0.039144	-0.065059
	0.039144	-0.065070
	0.039144	-0.065071
	0.039144	-0.065097
	0.039144	-0.065074
	0.039144	-0.065043
	0.054202	-0.063018
	0.054202	-0.062968
	0.054202	-0.062992
	0.054202	-0.062953
	0.054202	-0.062917
	0.054202	-0.062905
	0.054202	-0.062855
	0.054202	-0.062843
	0.054202	-0.062871
	0.054202	-0.062835
	0.054202	-0.062800
	0.054202	-0.062779
	0.054202	-0.062747
	0.054202	-0.062722
	0.054202	-0.062687
	0.054202	-0.062696
	0.054202	-0.062632
	0.054202	-0.062637
	0.054202	-0.062613
	0.054202	-0.062619
	0.054202	-0.062580
	0.054202	-0.062545
	0.054202	-0.062506
	0.054202	-0.062483
	0.054202	-0.062475
	0.054202	-0.062440
	0.054202	-0.062421
	0.054202	-0.062399
	0.054202	-0.062388
	0.054202	-0.062359
	0.054202	-0.062348
	0.054202	-0.062347
	0.054202	-0.062316
	0.054202	-0.062281
	0.054202	-0.062305
	0.054202	-0.062271
	0.054202	-0.062269
	0.054202	-0.062249
	0.054202	-0.062185
	0.054202	-0.062169
	0.054202	-0.062202
	0.054202	-0.062151
	0.054202	-0.062083
	0.054202	-0.062074
	0.054202	-0.062049
	0.054202	-0.062022
	0.054202	-0.062037
	0.054202	-0.062029
	0.054202	-0.062001
	0.054202	-0.061971
	0.093469	-0.056504
	0.093469	-0.056438
	0.093469	-0.056359
	0.093469	-0.056272
	0.093469	-0.056269
	0.093469	-0.056230
	0.093469	-0.056206
	0.093469	-0.056156
	0.093469	-0.056112
	0.093469	-0.056085
	0.093469	-0.056038
	0.093469	-0.056006
	0.093469	-0.055972
	0.093469	-0.055928
	0.093469	-0.055909
	0.093469	-0.055899
	0.093469	-0.055836
	0.093469	-0.055821
	0.093469	-0.055734
	0.093469	-0.055714
	0.093469	-0.055665
	0.093469	-0.055616
	0.093469	-0.055569
	0.093469	-0.055547
	0.093469	-0.055481
	0.093469	-0.055482
	0.093469	-0.055434
	0.093469	-0.055394
	0.093469	-0.055351
	0.093469	-0.055340
	0.093469	-0.055305
	0.093469	-0.055316
	0.093469	-0.055274
	0.093469	-0.055220
	0.093469	-0.055196
	0.093469	-0.055154
	0.093469	-0.055157
	0.093469	-0.055107
	0.093469	-0.055054
	0.093469	-0.055033
	0.093469	-0.054997
	0.093469	-0.055012
	0.093469	-0.054959
	0.093469	-0.054984
	0.093469	-0.054922
	0.093469	-0.054906
	0.093469	-0.054898
	0.093469	-0.054880
	0.093469	-0.054841
	0.093469	-0.054798
	0.212152	-0.043989
	0.212152	-0.043963
	0.212152	-0.043939
	0.212152	-0.043905
	0.212152	-0.043899
	0.212152	-0.043878
	0.212152	-0.043833
	0.212152	-0.043779
	0.212152	-0.043733
	0.212152	-0.043682
	0.212152	-0.043664
	0.212152	-0.043640
	0.212152	-0.043634
	0.212152	-0.043585
	0.212152	-0.043525
	0.212152	-0.043505
	0.212152	-0.043473
	0.212152	-0.043463
	0.212152	-0.043452
	0.212152	-0.043442
	0.212152	-0.043381
	0.212152	-0.043380
	0.212152	-0.043341
	0.212152	-0.043307
	0.212152	-0.043285
	0.212152	-0.043224
	0.212152	-0.043195
	0.212152	-0.043195
	0.212152	-0.043183
	0.212152	-0.043168
	0.212152	-0.043158
	0.212152	-0.043078
	0.212152	-0.043082
	0.212152	-0.043019
	0.212152	-0.043006
	0.212152	-0.042997
	0.212152	-0.042952
	0.212152	-0.042896
	0.212152	-0.042871
	0.212152	-0.042830
	0.212152	-0.042792
	0.212152	-0.042815
	0.212152	-0.042746
	0.212152	-0.042699
	0.212152	-0.042746
	0.212152	-0.042715
	0.212152	-0.042668
	0.212152	-0.042614
	0.212152	-0.042589
	0.212152	-0.042569
	0.382845	-0.013868
	0.382845	-0.013834
	0.382845	-0.013810
	0.382845	-0.013760
	0.382845	-0.013741
	0.382845	-0.013712
	0.382845	-0.013705
	0.382845	-0.013667
	0.382845	-0.013603
	0.382845	-0.013609
	0.382845	-0.013572
	0.382845	-0.013534
	0.382845	-0.013505
	0.382845	-0.013459
	0.382845	-0.013428
	0.382845	-0.013396
	0.382845	-0.013348
	0.382845	-0.013313
	0.382845	-0.013296
	0.382845	-0.013275
	0.382845	-0.013276
	0.382845	-0.013258
	0.382845	-0.013204
	0.382845	-0.013194
	0.382845	-0.013173
	0.382845	-0.013124
	0.382845	-0.013077
	0.382845	-0.013043
	0.382845	-0.013037
	0.382845	-0.013010
	0.382845	-0.012968
	0.382845	-0.012917
	0.382845	-0.012889
	0.382845	-0.012856
	0.382845	-0.012845
	0.382845	-0.012792
	0.382845	-0.012743
	0.382845	-0.012698
	0.382845	-0.012630
	0.382845	-0.012607
	0.382845	-0.012589
	0.382845	-0.012524
	0.382845	-0.012490
	0.382845	-0.012475
	0.382845	-0.012397
	0.382845	-0.012346
	0.382845	-0.012335
	0.382845	-0.012300
	0.382845	-0.012231
	0.382845	-0.012185
	0.603222	0.043143
	0.603222	0.043258
	0.603222	0.043388
	0.603222	0.043498
	0.603222	0.043612
	0.603222	0.043697
	0.603222	0.043824
	0.603222	0.043960
	0.603222	0.044120
	0.603222	0.044154
	0.603222	0.044237
	0.603222	0.044349
	0.603222	0.044416
	0.603222	0.044504
	0.603222	0.044618
	0.603222	0.044743
	0.603222	0.044885
	0.603222	0.044982
	0.603222	0.045072
	0.603222	0.045189
	0.603222	0.045280
	0.603222	0.045388
	0.603222	0.045479
	0.603222	0.045574
	0.603222	0.045662
	0.603222	0.045757
	0.603222	0.045889
	0.603222	0.045979
	0.603222	0.046073
	0.603222	0.046176
	0.603222	0.046281
	0.603222	0.046348
	0.603222	0.046418
	0.603222	0.046480
	0.603222	0.046524
	0.603222	0.046619
	0.603222	0.046737
	0.603222	0.046809
	0.603222	0.046964
	0.603222	0.047056
	0.603222	0.047086
	0.603222	0.047177
	0.603222	0.047232
	0.603222	0.047296
	0.603222	0.047374
	0.603222	0.047419
	0.603222	0.047509
	0.603222	0.047589
	0.603222	0.047691
	0.603222	0.047746
	0.858001	0.130057
	0.858001	0.130137
	0.858001	0.130232
	0.858001	0.130336
	0.858001	0.130396
	0.858001	0.130475
	0.858001	0.130580
	0.858001	0.130663
	0.858001	0.130752
	0.858001	0.130796
	0.858001	0.130891
	0.858001	0.130925
	0.858001	0.131000
	0.858001	0.131056
	0.858001	0.131104
	0.858001	0.131203
	0.858001	0.131264
	0.858001	0.131369
	0.858001	0.131440
	0.858001	0.131543
	0.858001	0.131557
	0.858001	0.131685
	0.858001	0.131725
	0.858001	0.131798
	0.858001	0.131876
	0.858001	0.131926
	0.858001	0.132001
	0.858001	0.132071
	0.858001	0.132139
	0.858001	0.132188
	0.858001	0.132244
	0.858001	0.132310
	0.858001	0.132367
	0.858001	0.132419
	0.858001	0.132463
	0.858001	0.132534
	0.858001	0.132684
	0.858001	0.132796
	0.858001	0.132714
	0.858001	0.132608
	0.858001	0.132728
	0.858001	0.132917
	0.858001	0.133066
	0.858001	0.133039
	0.858001	0.133053
	0.858001	0.133134
	0.858001	0.133222
	0.858001	0.133232
	0.858001	0.133343
	0.858001	0.133350
	1.147047	0.247531
	1.147047	0.247645
	1.147047	0.247680
	1.147047	0.247770
	1.147047	0.247842
	1.147047	0.247931
	1.147047	0.247974
	1.147047	0.248028
	1.147047	0.248134
	1.147047	0.248176
	1.147047	0.248251
	1.147047	0.248318
	1.147047	0.248417
	1.147047	0.248454
	1.147047	0.248539
	1.147047	0.248557
	1.147047	0.248613
	1.147047	0.248660
	1.147047	0.248691
	1.147047	0.248795
	1.147047	0.248829
	1.147047	0.248896
	1.147047	0.248927
	1.147047	0.249011
	1.147047	0.249051
	1.147047	0.249149
	1.147047	0.249166
	1.147047	0.249250
	1.147047	0.249288
	1.147047	0.249380
	1.147047	0.249467
	1.147047	0.249535
	1.147047	0.249592
	1.147047	0.249574
	1.147047	0.249681
	1.147047	0.249727
	1.147047	0.249783
	1.147047	0.249811
	1.147047	0.249910
	1.147047	0.249980
	1.147047	0.249977
	1.147047	0.250007
	1.147047	0.250097
	1.147047	0.250138
	1.147047	0.250206
	1.147047	0.250275
	1.147047	0.250333
	1.147047	0.250324
	1.147047	0.250398
	1.147047	0.250449
	1.465493	0.406616
	1.465493	0.406634
	1.465493	0.406720
	1.465493	0.406822
	1.465493	0.406855
	1.465493	0.406922
	1.465493	0.406958
	1.465493	0.407053
	1.465493	0.407083
	1.465493	0.407133
	1.465493	0.407157
	1.465493	0.407181
	1.465493	0.407232
	1.465493	0.407294
	1.465493	0.407354
	1.465493	0.407350
	1.465493	0.407395
	1.465493	0.407445
	1.465493	0.407506
	1.465493	0.407590
	1.465493	0.407643
	1.465493	0.407679
	1.465493	0.407713
	1.465493	0.407718
	1.465493	0.407748
	1.465493	0.407785
	1.465493	0.407862
	1.465493	0.407895
	1.465493	0.408004
	1.465493	0.408029
	1.465493	0.408083
	1.465493	0.408125
	1.465493	0.408193
	1.465493	0.408211
	1.465493	0.408245
	1.465493	0.408284
	1.465493	0.408355
	1.465493	0.408409
	1.465493	0.408439
	1.465493	0.408485
	1.465493	0.408506
	1.465493	0.408551
	1.465493	0.408580
	1.465493	0.408653
	1.465493	0.408718
	1.465493	0.408736
	1.465493	0.408762
	1.465493	0.408817
	1.465493	0.408849
	1.465493	0.408923
	1.774938	0.588244
	1.774938	0.588339
	1.774938	0.588309
	1.774938	0.588532
	1.774938	0.588769
	1.774938	0.588757
	1.774938	0.588573
	1.774938	0.588624
	1.774938	0.589246
	1.774938	0.588841
	1.774938	0.588769
	1.774938	0.587736
	1.774938	0.587952
	1.774938	0.587571
	1.774938	0.588043
	1.774938	0.588073
	1.774938	0.588576
	1.774938	0.587244
	1.774938	0.588408
	1.774938	0.588187
	1.774938	0.588237
	1.774938	0.588384
	1.774938	0.588357
	1.774938	0.588472
	1.774938	0.588435
	1.774938	0.588760
	1.774938	0.587780
	1.774938	0.588758
	1.774938	0.588372
	1.774938	0.588705
	1.774938	0.588563
	1.774938	0.588427
	1.774938	0.589145
	1.774938	0.588606
	1.774938	0.588851
	1.774938	0.589235
	1.774938	0.588144
	1.774938	0.589179
	1.774938	0.588890
	1.774938	0.588937
	1.774938	0.589107
	1.774938	0.589151
	1.774938	0.589135
	1.774938	0.588975
	1.774938	0.588805
	1.774938	0.589216
	1.774938	0.588243
	1.774938	0.589299
	1.774938	0.589239
	1.774938	0.589241
	2.100144	0.802649
	2.100144	0.803196
	2.100144	0.803238
	2.100144	0.804262
	2.100144	0.802786
	2.100144	0.803858
	2.100144	0.802613
	2.100144	0.804370
	2.100144	0.805017
	2.100144	0.803256
	2.100144	0.803233
	2.100144	0.803962
	2.100144	0.803811
	2.100144	0.803858
	2.100144	0.803298
	2.100144	0.804167
	2.100144	0.805112
	2.100144	0.802547
	2.100144	0.804140
	2.100144	0.804553
	2.100144	0.803558
	2.100144	0.804311
	2.100144	0.804352
	2.100144	0.805325
	2.100144	0.803117
	2.100144	0.804168
	2.100144	0.804352
	2.100144	0.804301
	2.100144	0.804771
	2.100144	0.803725
	2.100144	0.805046
	2.100144	0.804644
	2.100144	0.804782
	2.100144	0.804485
	2.100144	0.804609
	2.100144	0.804862
	2.100144	0.805023
	2.100144	0.804139
	2.100144	0.805094
	2.100144	0.804307
	2.100144	0.805594
	2.100144	0.806021
	2.100144	0.802955
	2.100144	0.805344
	2.100144	0.806274
	2.100144	0.804389
	2.100144	0.805038
	2.100144	0.806186
	2.100144	0.803850
	2.100144	0.805043
	2.424831	1.043149
	2.424831	1.044456
	2.424831	1.043718
	2.424831	1.043748
	2.424831	1.043536
	2.424831	1.044490
	2.424831	1.044428
	2.424831	1.044439
	2.424831	1.042936
	2.424831	1.043992
	2.424831	1.044335
	2.424831	1.043978
	2.424831	1.043724
	2.424831	1.044301
	2.424831	1.043719
	2.424831	1.043486
	2.424831	1.044760
	2.424831	1.044012
	2.424831	1.044629
	2.424831	1.044082
	2.424831	1.044647
	2.424831	1.044154
	2.424831	1.044770
	2.424831	1.045140
	2.424831	1.044192
	2.424831	1.044191
	2.424831	1.044364
	2.424831	1.045119
	2.424831	1.044705
	2.424831	1.044452
	2.424831	1.044151
	2.424831	1.044890
	2.424831	1.043133
	2.424831	1.045164
	2.424831	1.045432
	2.424831	1.044298
	2.424831	1.044790
	2.424831	1.044856
	2.424831	1.044784
	2.424831	1.045580
	2.424831	1.044315
	2.424831	1.044657
	2.424831	1.044729
	2.424831	1.045509
	2.424831	1.045575
	2.424831	1.045346
	2.424831	1.043858
	2.424831	1.045884
	2.424831	1.044524
	2.424831	1.045789
	2.714696	1.279684
	2.714696	1.278545
	2.714696	1.279105
	2.714696	1.278342
	2.714696	1.277738
	2.714696	1.278838
	2.714696	1.279188
	2.714696	1.277502
	2.714696	1.279220
	2.714696	1.279265
	2.714696	1.279281
	2.714696	1.280313
	2.714696	1.279468
	2.714696	1.278646
	2.714696	1.278616
	2.714696	1.278908
	2.714696	1.279289
	2.714696	1.279325
	2.714696	1.279454
	2.714696	1.279355
	2.714696	1.279895
	2.714696	1.278871
	2.714696	1.280182
	2.714696	1.279867
	2.714696	1.279830
	2.714696	1.280216
	2.714696	1.280051
	2.714696	1.278727
	2.714696	1.279860
	2.714696	1.280728
	2.714696	1.279668
	2.714696	1.280215
	2.714696	1.281123
	2.714696	1.279432
	2.714696	1.278768
	2.714696	1.280632
	2.714696	1.279101
	2.714696	1.279794
	2.714696	1.281064
	2.714696	1.279876
	2.714696	1.280310
	2.714696	1.279825
	2.714696	1.279363
	2.714696	1.279647
	2.714696	1.280698
	2.714696	1.278946
	2.714696	1.279886
	2.714696	1.279895
	2.714696	1.280592
	2.714696	1.281550
	2.831589	1.382388
	2.831589	1.381878
	2.831589	1.382292
	2.831589	1.381838
	2.831589	1.381854
	2.831589	1.382683
	2.831589	1.382340
	2.831589	1.381872
	2.831589	1.382394
	2.831589	1.382483
	2.831589	1.382084
	2.831589	1.382298
	2.831589	1.382867
	2.831589	1.383085
	2.831589	1.383977
	2.831589	1.382165
	2.831589	1.380865
	2.831589	1.382533
	2.831589	1.382085
	2.831589	1.381328
	2.831589	1.382320
	2.831589	1.381851
	2.831589	1.382429
	2.831589	1.381612
	2.831589	1.382599
	2.831589	1.382745
	2.831589	1.380811
	2.831589	1.383044
	2.831589	1.382845
	2.831589	1.382591
	2.831589	1.383314
	2.831589	1.383624
	2.831589	1.382790
	2.831589	1.383023
	2.831589	1.382932
	2.831589	1.381948
	2.831589	1.383118
	2.831589	1.383231
	2.831589	1.382970
	2.831589	1.382846
	2.831589	1.381549
	2.831589	1.382680
	2.831589	1.382802
	2.831589	1.382202
	2.831589	1.382223
	2.831589	1.382789
	2.831589	1.382600
	2.831589	1.383643
	2.831589	1.382553
	2.831589	1.382261
	2.917206	1.459843
	2.917206	1.459577
	2.917206	1.459843
	2.917206	1.459087
	2.917206	1.459618
	2.917206	1.458936
	2.917206	1.459917
	2.917206	1.459079
	2.917206	1.459919
	2.917206	1.460191
	2.917206	1.459130
	2.917206	1.459983
	2.917206	1.459770
	2.917206	1.460532
	2.917206	1.461356
	2.917206	1.459191
	2.917206	1.458606
	2.917206	1.458266
	2.917206	1.458131
	2.917206	1.459666
	2.917206	1.459932
	2.917206	1.460379
	2.917206	1.458887
	2.917206	1.459202
	2.917206	1.458942
	2.917206	1.459482
	2.917206	1.459095
	2.917206	1.458682
	2.917206	1.458776
	2.917206	1.458859
	2.917206	1.459075
	2.917206	1.459696
	2.917206	1.459827
	2.917206	1.458717
	2.917206	1.459691
	2.917206	1.458660
	2.917206	1.459540
	2.917206	1.459427
	2.917206	1.458802
	2.917206	1.460141
	2.917206	1.459260
	2.917206	1.458931
	2.917206	1.459492
	2.917206	1.459226
	2.917206	1.460210
	2.917206	1.457921
	2.917206	1.458388
	2.917206	1.459372
	2.917206	1.459461
	2.917206	1.459252
	3.002468	1.538935
	3.002468	1.538400
	3.002468	1.539056
	3.002468	1.538046
	3.002468	1.539382
	3.002468	1.537912
	3.002468	1.538850
	3.002468	1.538349
	3.002468	1.538362
	3.002468	1.538901
	3.002468	1.538807
	3.002468	1.538510
	3.002468	1.539964
	3.002468	1.539864
	3.002468	1.538970
	3.002468	1.539277
	3.002468	1.538871
	3.002468	1.539290
	3.002468	1.539185
	3.002468	1.539588
	3.002468	1.538625
	3.002468	1.537927
	3.002468	1.539598
	3.002468	1.539595
	3.002468	1.538133
	3.002468	1.539155
	3.002468	1.539389
	3.002468	1.538890
	3.002468	1.539028
	3.002468	1.539014
	3.002468	1.539515
	3.002468	1.538787
	3.002468	1.538852
	3.002468	1.539213
	3.002468	1.539673
	3.002468	1.538923
	3.002468	1.539161
	3.002468	1.539031
	3.002468	1.538524
	3.002468	1.538261
	3.002468	1.538901
	3.002468	1.538364
	3.002468	1.539731
	3.002468	1.538579
	3.002468	1.538119
	3.002468	1.539092
	3.002468	1.539517
	3.002468	1.539653
	3.002468	1.538338
	3.002468	1.538956
	3.002468	1.539208
	3.002468	1.540777
	3.002468	1.538215
	3.002468	1.538528
	3.002468	1.539831
	3.002468	1.538892
	3.002468	1.538615
	3.002468	1.538890
	3.002468	1.538617
	3.002468	1.539249
	3.002468	1.540191
	3.002468	1.538462
	3.002468	1.538193
	3.002468	1.538529
	3.002468	1.538764
	3.002468	1.538242
	3.002468	1.538999
	3.002468	1.538429
	3.002468	1.537339
	3.002468	1.539001
	3.002468	1.540217
	3.002468	1.537614
	3.002468	1.537449
	3.002468	1.539882
	3.002468	1.538284
	3.002468	1.539055
	3.002468	1.538763
	3.002468	1.537985
	3.002468	1.538369
	3.002468	1.538656
	3.002468	1.538736
	3.002468	1.538801
	3.002468	1.538712
	3.002468	1.538706
	3.002468	1.538778
	3.002468	1.539419
	3.002468	1.538928
	3.002468	1.538790
	3.002468	1.538674
	3.002468	1.539237
	3.002468	1.538667
	3.002468	1.539667
	3.002468	1.537932
	3.002468	1.538482
	3.002468	1.538888
	3.002468	1.538224
	3.002468	1.538568
	3.002468	1.538531
	3.002468	1.538923
	3.002468	1.538302
	3.002468	1.538494
	3.002468	1.538003
	3.002468	1.539173
	3.002468	1.538820
	3.002468	1.538657
	3.002468	1.538409
	3.002468	1.537587
	3.002468	1.537756
	3.002468	1.538557
	3.002468	1.537935
	3.002468	1.538456
	3.002468	1.539407
	3.002468	1.537584
	3.002468	1.537810
	3.002468	1.538198
	3.002468	1.538184
	3.002468	1.539163
	3.002468	1.538738
	3.002468	1.537447
	3.002468	1.538664
	3.002468	1.538361
	3.002468	1.538167
	3.002468	1.538059
	3.002468	1.538379
	3.002468	1.537844
	3.002468	1.538389
	3.002468	1.538175
	3.002468	1.538492
	3.002468	1.538821
	3.002468	1.538187
	3.002468	1.537945
	3.002468	1.537858
	3.002468	1.538657
	3.002468	1.538240
	3.002468	1.538808
	3.002468	1.538147
	3.002468	1.538882
	3.002468	1.536813
	3.002468	1.537503
	3.002468	1.537961
	3.002468	1.539081
	3.002468	1.537921
	3.002468	1.538016
	3.002468	1.537966
	3.002468	1.537884
	3.002468	1.537659
	3.002468	1.538435
	3.002468	1.538089
	3.002468	1.537702
	2.945715	1.496537
	2.945715	1.496347
	2.945715	1.497453
	2.945715	1.497096
	2.945715	1.496813
	2.945715	1.497001
	2.945715	1.496353
	2.945715	1.496563
	2.945715	1.496214
	2.945715	1.496434
	2.945715	1.496726
	2.945715	1.496879
	2.945715	1.496511
	2.945715	1.497758
	2.945715	1.497443
	2.945715	1.496706
	2.945715	1.497267
	2.945715	1.496790
	2.945715	1.496784
	2.945715	1.496959
	2.945715	1.497236
	2.945715	1.497388
	2.945715	1.498045
	2.945715	1.497480
	2.945715	1.497080
	2.945715	1.497894
	2.945715	1.497872
	2.945715	1.497564
	2.945715	1.497551
	2.945715	1.498167
	2.945715	1.498170
	2.945715	1.498440
	2.945715	1.498578
	2.945715	1.498923
	2.945715	1.497697
	2.945715	1.498035
	2.945715	1.498744
	2.945715	1.497842
	2.945715	1.498242
	2.945715	1.497673
	2.945715	1.498125
	2.945715	1.498809
	2.945715	1.498772
	2.945715	1.497727
	2.945715	1.497773
	2.945715	1.498824
	2.945715	1.498823
	2.945715	1.498351
	2.945715	1.498522
	2.945715	1.499168
	2.837101	1.403391
	2.837101	1.405077
	2.837101	1.405340
	2.837101	1.405833
	2.837101	1.404140
	2.837101	1.404967
	2.837101	1.404752
	2.837101	1.405409
	2.837101	1.406016
	2.837101	1.405943
	2.837101	1.405487
	2.837101	1.405677
	2.837101	1.405558
	2.837101	1.405768
	2.837101	1.405280
	2.837101	1.407481
	2.837101	1.406103
	2.837101	1.406321
	2.837101	1.406030
	2.837101	1.405642
	2.837101	1.405987
	2.837101	1.406286
	2.837101	1.407164
	2.837101	1.405744
	2.837101	1.406270
	2.837101	1.406725
	2.837101	1.406645
	2.837101	1.406489
	2.837101	1.406885
	2.837101	1.406439
	2.837101	1.407516
	2.837101	1.406454
	2.837101	1.407095
	2.837101	1.407455
	2.837101	1.406695
	2.837101	1.407307
	2.837101	1.407366
	2.837101	1.408240
	2.837101	1.408277
	2.837101	1.408498
	2.837101	1.406723
	2.837101	1.407930
	2.837101	1.407746
	2.837101	1.407484
	2.837101	1.407564
	2.837101	1.407981
	2.837101	1.407443
	2.837101	1.407332
	2.837101	1.407381
	2.837101	1.408358
	2.726848	1.312253
	2.726848	1.312362
	2.726848	1.313151
	2.726848	1.312318
	2.726848	1.313954
	2.726848	1.312767
	2.726848	1.314232
	2.726848	1.312506
	2.726848	1.312566
	2.726848	1.313717
	2.726848	1.313836
	2.726848	1.313868
	2.726848	1.312858
	2.726848	1.313885
	2.726848	1.313897
	2.726848	1.313951
	2.726848	1.315469
	2.726848	1.313463
	2.726848	1.314010
	2.726848	1.314260
	2.726848	1.314207
	2.726848	1.314612
	2.726848	1.315349
	2.726848	1.314529
	2.726848	1.313395
	2.726848	1.314436
	2.726848	1.315050
	2.726848	1.314958
	2.726848	1.314483
	2.726848	1.314680
	2.726848	1.314242
	2.726848	1.314834
	2.726848	1.315015
	2.726848	1.314653
	2.726848	1.316085
	2.726848	1.314649
	2.726848	1.315161
	2.726848	1.315959
	2.726848	1.315294
	2.726848	1.316013
	2.726848	1.315864
	2.726848	1.315725
	2.726848	1.315835
	2.726848	1.314332
	2.726848	1.314753
	2.726848	1.316365
	2.726848	1.315927
	2.726848	1.314510
	2.726848	1.315758
	2.726848	1.315857
	2.477145	1.112513
	2.477145	1.111983
	2.477145	1.111776
	2.477145	1.111801
	2.477145	1.112498
	2.477145	1.111593
	2.477145	1.112708
	2.477145	1.112642
	2.477145	1.112875
	2.477145	1.111131
	2.477145	1.112738
	2.477145	1.113506
	2.477145	1.113270
	2.477145	1.113515
	2.477145	1.112991
	2.477145	1.112697
	2.477145	1.111683
	2.477145	1.112718
	2.477145	1.111613
	2.477145	1.112887
	2.477145	1.113030
	2.477145	1.113386
	2.477145	1.112271
	2.477145	1.112961
	2.477145	1.111480
	2.477145	1.111496
	2.477145	1.111961
	2.477145	1.111920
	2.477145	1.112930
	2.477145	1.112568
	2.477145	1.112046
	2.477145	1.111799
	2.477145	1.112628
	2.477145	1.111752
	2.477145	1.111251
	2.477145	1.112068
	2.477145	1.111646
	2.477145	1.112010
	2.477145	1.112943
	2.477145	1.112970
	2.477145	1.110899
	2.477145	1.111127
	2.477145	1.111835
	2.477145	1.111461
	2.477145	1.112226
	2.477145	1.111442
	2.477145	1.111238
	2.477145	1.110868
	2.477145	1.111300
	2.477145	1.111686
	2.107031	0.837999
	2.107031	0.839153
	2.107031	0.838378
	2.107031	0.837664
	2.107031	0.837768
	2.107031	0.838249
	2.107031	0.838095
	2.107031	0.837476
	2.107031	0.837420
	2.107031	0.838385
	2.107031	0.837437
	2.107031	0.838314
	2.107031	0.837754
	2.107031	0.839020
	2.107031	0.837038
	2.107031	0.838636
	2.107031	0.839539
	2.107031	0.837828
	2.107031	0.838741
	2.107031	0.837762
	2.107031	0.837673
	2.107031	0.839648
	2.107031	0.838713
	2.107031	0.837199
	2.107031	0.838536
	2.107031	0.839114
	2.107031	0.837773
	2.107031	0.838640
	2.107031	0.837784
	2.107031	0.837373
	2.107031	0.838126
	2.107031	0.836796
	2.107031	0.837832
	2.107031	0.837368
	2.107031	0.837581
	2.107031	0.838726
	2.107031	0.837260
	2.107031	0.836740
	2.107031	0.838342
	2.107031	0.836986
	2.107031	0.839316
	2.107031	0.837698
	2.107031	0.838306
	2.107031	0.836948
	2.107031	0.836974
	2.107031	0.837353
	2.107031	0.837226
	2.107031	0.837765
	2.107031	0.837997
	2.107031	0.837483
	1.734551	0.596487
	1.734551	0.597024
	1.734551	0.597041
	1.734551	0.596897
	1.734551	0.596655
	1.734551	0.596431
	1.734551	0.596566
	1.734551	0.596770
	1.734551	0.596481
	1.734551	0.596713
	1.734551	0.596711
	1.734551	0.596284
	1.734551	0.596845
	1.734551	0.596904
	1.734551	0.596820
	1.734551	0.596692
	1.734551	0.596525
	1.734551	0.596672
	1.734551	0.596579
	1.734551	0.596441
	1.734551	0.596786
	1.734551	0.596474
	1.734551	0.596308
	1.734551	0.596574
	1.734551	0.596840
	1.734551	0.596734
	1.734551	0.596683
	1.734551	0.596585
	1.734551	0.596784
	1.734551	0.596733
	1.734551	0.596306
	1.734551	0.596822
	1.734551	0.596530
	1.734551	0.596494
	1.734551	0.596224
	1.734551	0.596877
	1.734551	0.596635
	1.734551	0.596110
	1.734551	0.596440
	1.734551	0.596613
	1.734551	0.596595
	1.734551	0.596572
	1.734551	0.596334
	1.734551	0.596075
	1.734551	0.596662
	1.734551	0.596540
	1.734551	0.596374
	1.734551	0.595728
	1.734551	0.596555
	1.734551	0.596783
	1.322983	0.370778
	1.322983	0.370771
	1.322983	0.370727
	1.322983	0.370733
	1.322983	0.370757
	1.322983	0.370749
	1.322983	0.370741
	1.322983	0.370695
	1.322983	0.370671
	1.322983	0.370743
	1.322983	0.370703
	1.322983	0.370705
	1.322983	0.370704
	1.322983	0.370730
	1.322983	0.370671
	1.322983	0.370642
	1.322983	0.370644
	1.322983	0.370669
	1.322983	0.370641
	1.322983	0.370661
	1.322983	0.370626
	1.322983	0.370651
	1.322983	0.370679
	1.322983	0.370682
	1.322983	0.370629
	1.322983	0.370571
	1.322983	0.370600
	1.322983	0.370667
	1.322983	0.370637
	1.322983	0.370614
	1.322983	0.370608
	1.322983	0.370587
	1.322983	0.370596
	1.322983	0.370661
	1.322983	0.370649
	1.322983	0.370589
	1.322983	0.370589
	1.322983	0.370573
	1.322983	0.370539
	1.322983	0.370493
	1.322983	0.370497
	1.322983	0.370565
	1.322983	0.370587
	1.322983	0.370571
	1.322983	0.370607
	1.322983	0.370595
	1.322983	0.370612
	1.322983	0.370598
	1.322983	0.370611
	1.322983	0.370563
	0.955849	0.213992
	0.955849	0.213965
	0.955849	0.213940
	0.955849	0.213953
	0.955849	0.214005
	0.955849	0.214022
	0.955849	0.213998
	0.955849	0.213966
	0.955849	0.213953
	0.955849	0.213961
	0.955849	0.213946
	0.955849	0.213921
	0.955849	0.213924
	0.955849	0.213913
	0.955849	0.213893
	0.955849	0.213901
	0.955849	0.213919
	0.955849	0.213898
	0.955849	0.213939
	0.955849	0.213913
	0.955849	0.213914
	0.955849	0.213880
	0.955849	0.213894
	0.955849	0.213883
	0.955849	0.213922
	0.955849	0.213913
	0.955849	0.213902
	0.955849	0.213891
	0.955849	0.213965
	0.955849	0.213965
	0.955849	0.214011
	0.955849	0.213947
	0.955849	0.213961
	0.955849	0.213972
	0.955849	0.213975
	0.955849	0.213949
	0.955849	0.213923
	0.955849	0.213925
	0.955849	0.213992
	0.955849	0.214013
	0.955849	0.213990
	0.955849	0.213998
	0.955849	0.214005
	0.955849	0.214005
	0.955849	0.214009
	0.955849	0.214020
	0.955849	0.214005
	0.955849	0.213990
	0.955849	0.214009
	0.955849	0.214042
	0.635608	0.109281
	0.635608	0.109251
	0.635608	0.109250
	0.635608	0.109270
	0.635608	0.109287
	0.635608	0.109299
	0.635608	0.109315
	0.635608	0.109342
	0.635608	0.109331
	0.635608	0.109329
	0.635608	0.109361
	0.635608	0.109321
	0.635608	0.109311
	0.635608	0.109329
	0.635608	0.109293
	0.635608	0.109299
	0.635608	0.109325
	0.635608	0.109385
	0.635608	0.109327
	0.635608	0.109319
	0.635608	0.109354
	0.635608	0.109321
	0.635608	0.109329
	0.635608	0.109326
	0.635608	0.109315
	0.635608	0.109300
	0.635608	0.109280
	0.635608	0.109304
	0.635608	0.109311
	0.635608	0.109239
	0.635608	0.109223
	0.635608	0.109257
	0.635608	0.109256
	0.635608	0.109334
	0.635608	0.109337
	0.635608	0.109342
	0.635608	0.109354
	0.635608	0.109342
	0.635608	0.109351
	0.635608	0.109365
	0.635608	0.109341
	0.635608	0.109369
	0.635608	0.109385
	0.635608	0.109419
	0.635608	0.109404
	0.635608	0.109390
	0.635608	0.109433
	0.635608	0.109406
	0.635608	0.109454
	0.635608	0.109405
	0.362614	0.044864
	0.362614	0.044872
	0.362614	0.044848
	0.362614	0.044848
	0.362614	0.044846
	0.362614	0.044869
	0.362614	0.044834
	0.362614	0.044830
	0.362614	0.044834
	0.362614	0.044787
	0.362614	0.044793
	0.362614	0.044798
	0.362614	0.044773
	0.362614	0.044783
	0.362614	0.044775
	0.362614	0.044770
	0.362614	0.044742
	0.362614	0.044723
	0.362614	0.044751
	0.362614	0.044771
	0.362614	0.044756
	0.362614	0.044805
	0.362614	0.044787
	0.362614	0.044755
	0.362614	0.044750
	0.362614	0.044770
	0.362614	0.044795
	0.362614	0.044801
	0.362614	0.044796
	0.362614	0.044762
	0.362614	0.044754
	0.362614	0.044785
	0.362614	0.044746
	0.362614	0.044772
	0.362614	0.044785
	0.362614	0.044736
	0.362614	0.044707
	0.362614	0.044668
	0.362614	0.044661
	0.362614	0.044651
	0.362614	0.044664
	0.362614	0.044709
	0.362614	0.044680
	0.362614	0.044680
	0.362614	0.044664
	0.362614	0.044698
	0.362614	0.044700
	0.362614	0.044723
	0.362614	0.044691
	0.362614	0.044648
	0.163062	0.015941
	0.163062	0.015956
	0.163062	0.015958
	0.163062	0.016007
	0.163062	0.016021
	0.163062	0.016022
	0.163062	0.015992
	0.163062	0.016014
	0.163062	0.016047
	0.163062	0.016042
	0.163062	0.016060
	0.163062	0.016091
	0.163062	0.016088
	0.163062	0.016030
	0.163062	0.016004
	0.163062	0.016020
	0.163062	0.015974
	0.163062	0.015971
	0.163062	0.015995
	0.163062	0.016008
	0.163062	0.015988
	0.163062	0.015993
	0.163062	0.016004
	0.163062	0.016022
	0.163062	0.016014
	0.163062	0.016021
	0.163062	0.016003
	0.163062	0.015959
	0.163062	0.015969
	0.163062	0.015961
	0.163062	0.015950
	0.163062	0.015984
	0.163062	0.015971
	0.163062	0.015980
	0.163062	0.015997
	0.163062	0.015965
	0.163062	0.015952
	0.163062	0.015964
	0.163062	0.015926
	0.163062	0.015947
	0.163062	0.015917
	0.163062	0.015940
	0.163062	0.015959
	0.163062	0.015974
	0.163062	0.015961
	0.163062	0.015940
	0.163062	0.015935
	0.163062	0.015921
	0.163062	0.015961
	0.163062	0.015955
	0.068623	0.002983
	0.068623	0.002918
	0.068623	0.002877
	0.068623	0.002815
	0.068623	0.002730
	0.068623	0.002693
	0.068623	0.002678
	0.068623	0.002612
	0.068623	0.002580
	0.068623	0.002506
	0.068623	0.002480
	0.068623	0.002462
	0.068623	0.002369
	0.068623	0.002307
	0.068623	0.002270
	0.068623	0.002218
	0.068623	0.002180
	0.068623	0.002154
	0.068623	0.002108
	0.068623	0.002027
	0.068623	0.001966
	0.068623	0.001938
	0.068623	0.001908
	0.068623	0.001869
	0.068623	0.001822
	0.068623	0.001804
	0.068623	0.001786
	0.068623	0.001764
	0.068623	0.001729
	0.068623	0.001683
	0.068623	0.001594
	0.068623	0.001549
	0.068623	0.001527
	0.068623	0.001448
	0.068623	0.001415
	0.068623	0.001356
	0.068623	0.001320
	0.068623	0.001307
	0.068623	0.001262
	0.068623	0.001183
	0.068623	0.001148
	0.068623	0.001131
	0.068623	0.001089
	0.068623	0.001065
	0.068623	0.001040
	0.068623	0.001041
	0.068623	0.000976
	0.068623	0.000903
	0.068623	0.000858
	0.068623	0.000803
	0.043849	-0.009119
	0.043849	-0.009197
	0.043849	-0.009291
	0.043849	-0.009368
	0.043849	-0.009540
	0.043849	-0.009573
	0.043849	-0.009691
	0.043849	-0.009760
	0.043849	-0.009832
	0.043849	-0.009931
	0.043849	-0.010049
	0.043849	-0.010124
	0.043849	-0.010268
	0.043849	-0.010393
	0.043849	-0.010504
	0.043849	-0.010573
	0.043849	-0.010642
	0.043849	-0.010720
	0.043849	-0.010826
	0.043849	-0.010952
	0.043849	-0.011021
	0.043849	-0.011070
	0.043849	-0.011169
	0.043849	-0.011228
	0.043849	-0.011337
	0.043849	-0.011420
	0.043849	-0.011529
	0.043849	-0.011593
	0.043849	-0.011692
	0.043849	-0.011781
	0.043849	-0.011879
	0.043849	-0.011945
	0.043849	-0.012004
	0.043849	-0.012094
	0.043849	-0.012206
	0.043849	-0.012275
	0.043849	-0.012380
	0.043849	-0.012432
	0.043849	-0.012570
	0.043849	-0.012631
	0.043849	-0.012725
	0.043849	-0.012796
	0.043849	-0.012916
	0.043849	-0.012964
	0.043849	-0.013021
	0.043849	-0.013065
	0.043849	-0.013139
	0.043849	-0.013160
	0.043849	-0.013269
	0.043849	-0.013414
	0.038333	-0.017679
	0.038333	-0.017767
	0.038333	-0.017829
	0.038333	-0.017920
	0.038333	-0.017955
	0.038333	-0.018006
	0.038333	-0.018122
	0.038333	-0.018154
	0.038333	-0.018219
	0.038333	-0.018341
	0.038333	-0.018401
	0.038333	-0.018490
	0.038333	-0.018593
	0.038333	-0.018701
	0.038333	-0.018730
	0.038333	-0.018840
	0.038333	-0.018936
	0.038333	-0.019020
	0.038333	-0.019072
	0.038333	-0.019102
	0.038333	-0.019191
	0.038333	-0.019290
	0.038333	-0.019366
	0.038333	-0.019443
	0.038333	-0.019543
	0.038333	-0.019627
	0.038333	-0.019718
	0.038333	-0.019790
	0.038333	-0.019858
	0.038333	-0.019904
	0.038333	-0.019980
	0.038333	-0.020140
	0.038333	-0.020164
	0.038333	-0.020219
	0.038333	-0.020320
	0.038333	-0.020414
	0.038333	-0.020459
	0.038333	-0.020550
	0.038333	-0.020613
	0.038333	-0.020684
	0.038333	-0.020732
	0.038333	-0.020791
	0.038333	-0.020870
	0.038333	-0.020964
	0.038333	-0.021019
	0.038333	-0.021092
	0.038333	-0.021148
	0.038333	-0.021223
	0.038333	-0.021281
	0.038333	-0.021324
	0.038333	-0.021388
	0.038333	-0.021467
	0.038333	-0.021542
	0.038333	-0.021621
	0.038333	-0.021721
	0.038333	-0.021791
	0.038333	-0.021879
	0.038333	-0.021941
	0.038333	-0.021967
	0.038333	-0.022037
	0.038333	-0.022145
	0.038333	-0.022195
	0.038333	-0.022267
	0.038333	-0.022286
	0.038333	-0.022352
	0.038333	-0.022454
	0.038333	-0.022494
	0.038333	-0.022591
	0.038333	-0.022687
	0.038333	-0.022716
	0.038333	-0.022771
	0.038333	-0.022836
	0.038333	-0.022931
	0.038333	-0.022943
	0.038333	-0.023045
	0.038333	-0.023091
	0.038333	-0.023186
	0.038333	-0.023187
	0.038333	-0.023250
	0.038333	-0.023353
	0.038333	-0.023359
	0.038333	-0.023478
	0.038333	-0.023540
	0.038333	-0.023606
	0.038333	-0.023669
	0.038333	-0.023713
	0.038333	-0.023763
	0.038333	-0.023816
	0.038333	-0.023865
	0.038333	-0.023931
	0.038333	-0.023958
	0.038333	-0.024036
	0.038333	-0.024096
	0.038333	-0.024178
	0.038333	-0.024249
	0.038333	-0.024324
	0.038333	-0.024417
	0.038333	-0.024454
	0.038333	-0.024534
	0.038333	-0.024613
	0.038333	-0.024659
	0.038333	-0.024718
	0.038333	-0.024823
	0.038333	-0.024831
	0.038333	-0.024905
	0.038333	-0.024982
	0.038333	-0.025038
	0.038333	-0.025073
	0.038333	-0.025112
	0.038333	-0.025217
	0.038333	-0.025312
	0.038333	-0.025389
	0.038333	-0.025426
	0.038333	-0.025427
	0.038333	-0.025507
	0.038333	-0.025561
	0.038333	-0.025628
	0.038333	-0.025678
	0.038333	-0.025727
	0.038333	-0.025790
	0.038333	-0.025837
	0.038333	-0.025909
	0.038333	-0.025982
	0.038333	-0.026046
	0.038333	-0.026078
	0.038333	-0.026116
	0.038333	-0.026143
	0.038333	-0.026212
	0.038333	-0.026249
	0.038333	-0.026309
	0.038333	-0.026396
	0.038333	-0.026455
	0.038333	-0.026523
	0.038333	-0.026586
	0.038333	-0.026642
	0.038333	-0.026678
	0.038333	-0.026734
	0.038333	-0.026817
	0.038333	-0.026825
	0.038333	-0.026883
	0.038333	-0.026928
	0.038333	-0.026987
	0.038333	-0.027016
	0.038333	-0.027109
	0.038333	-0.027164
	0.038333	-0.027210
	0.038333	-0.027237
	0.038333	-0.027330
	0.038333	-0.027415
	0.038333	-0.027477
	0.038333	-0.027516
	0.038333	-0.027598
	0.038333	-0.027551
	0.038333	-0.027619
	0.038333	-0.027686
	0.038333	-0.027764
	0.038333	-0.027791
	0.038333	-0.027861
	0.038333	-0.027910
	0.038333	-0.027952
	0.038333	-0.028009
	0.038333	-0.028028
	0.038333	-0.028099
	0.038333	-0.028180
	0.038333	-0.028214
	0.038333	-0.028248
	0.038333	-0.028297
	0.038333	-0.028363
	0.038333	-0.028453
	0.038333	-0.028482
	0.038333	-0.028561
	0.038333	-0.028600
	0.038333	-0.028590
	0.038333	-0.028690
	0.038333	-0.028712
	0.038333	-0.028744
	0.038333	-0.028826
	0.038333	-0.028845
	0.038333	-0.028925
	0.038333	-0.028933
	0.038333	-0.028999
	0.038333	-0.029051
	0.038333	-0.029120
	0.038333	-0.029171
	0.038333	-0.029234
	0.038333	-0.029293
	0.038333	-0.029344
	0.038333	-0.029391
	0.038333	-0.029431
	0.038333	-0.029484
	0.038333	-0.029543
	0.038333	-0.029626
	0.038333	-0.029686
	0.038333	-0.029700
	0.038333	-0.029740
	0.038333	-0.029812
	0.038333	-0.029888
	0.038333	-0.029956
	0.038333	-0.029999
	0.038333	-0.030106
	0.038333	-0.030111
	0.038333	-0.030102
	0.038333	-0.030140
	0.038333	-0.030229
	0.038333	-0.030275
	0.038333	-0.030321
	0.038333	-0.030312
	0.038333	-0.030383
	0.038333	-0.030468
	0.038333	-0.030536
	0.038333	-0.030580
	0.038333	-0.030628
	0.038333	-0.030682
	0.038333	-0.030674
	0.038333	-0.030745
	0.038333	-0.030821
	0.038333	-0.030828
	0.038333	-0.030886
	0.038333	-0.030932
	0.038333	-0.030962
	0.038333	-0.031010
	0.038333	-0.031068
	0.038333	-0.031104
	0.038333	-0.031170
	0.038333	-0.031230
	0.038333	-0.031259
	0.038333	-0.031323
	0.038333	-0.031401
	0.038333	-0.031425
	0.038333	-0.031458
	0.038333	-0.031492
	0.038333	-0.031525
	0.038333	-0.031588
	0.038333	-0.031620
	0.038333	-0.031657
	0.038333	-0.031657
	0.038333	-0.031720
	0.038333	-0.031775
	0.038333	-0.031819
	0.038333	-0.031882
	0.038333	-0.031923
	0.038333	-0.031945
	0.038333	-0.031992
	0.038333	-0.032020
	0.038333	-0.032078
	0.038333	-0.032138
	0.038333	-0.032189
	0.038333	-0.032235
	0.038333	-0.032280
	0.038333	-0.032319
	0.038333	-0.032370
	0.038333	-0.032394
	0.038333	-0.032477
	0.038333	-0.032528
	0.038333	-0.032581
	0.038333	-0.032624
	0.038333	-0.032645
	0.038333	-0.032711
	0.038333	-0.032750
	0.038333	-0.032785
	0.038333	-0.032856
	0.038333	-0.032859
	0.038333	-0.032896
	0.038333	-0.032947
	0.038333	-0.032996
	0.038333	-0.033043
	0.038333	-0.033084
	0.038333	-0.033098
	0.038333	-0.033205
	0.038333	-0.033254
	0.038333	-0.033322
	0.038543	-0.034803
	0.038543	-0.034827
	0.038543	-0.034898
	0.038543	-0.034913
	0.038543	-0.034932
	0.038543	-0.034981
	0.038543	-0.034980
	0.038543	-0.034988
	0.038543	-0.035041
	0.038543	-0.035085
	0.038543	-0.035137
	0.038543	-0.035180
	0.038543	-0.035221
	0.038543	-0.035245
	0.038543	-0.035352
	0.038543	-0.035405
	0.038543	-0.035408
	0.038543	-0.035430
	0.038543	-0.035470
	0.038543	-0.035493
	0.038543	-0.035528
	0.038543	-0.035543
	0.038543	-0.035610
	0.038543	-0.035658
	0.038543	-0.035699
	0.038543	-0.035728
	0.038543	-0.035751
	0.038543	-0.035790
	0.038543	-0.035825
	0.038543	-0.035860
	0.038543	-0.035918
	0.038543	-0.035941
	0.038543	-0.036002
	0.038543	-0.036033
	0.038543	-0.036096
	0.038543	-0.036149
	0.038543	-0.036118
	0.038543	-0.036153
	0.038543	-0.036167
	0.038543	-0.036160
	0.038543	-0.036192
	0.038543	-0.036281
	0.038543	-0.036295
	0.038543	-0.036343
	0.038543	-0.036382
	0.038543	-0.036416
	0.038543	-0.036458
	0.038543	-0.036563
	0.038543	-0.036551
	0.038543	-0.036543
	0.038543	-0.036608
	0.038543	-0.036663
	0.038543	-0.036722
	0.038543	-0.036757
	0.038543	-0.036775
	0.038543	-0.036795
	0.038543	-0.036843
	0.038543	-0.036930
	0.038543	-0.036938
	0.038543	-0.036986
	0.038543	-0.037031
	0.038543	-0.037066
	0.038543	-0.037101
	0.038543	-0.037134
	0.038543	-0.037184
	0.038543	-0.037201
	0.038543	-0.037263
	0.038543	-0.037274
	0.038543	-0.037363
	0.038543	-0.037357
	0.038543	-0.037408
	0.038543	-0.037405
	0.038543	-0.037473
	0.038543	-0.037510
	0.038543	-0.037524
	0.038543	-0.037555
	0.038543	-0.037617
	0.038543	-0.037668
	0.038543	-0.037699
	0.038543	-0.037713
	0.038543	-0.037743
	0.038543	-0.037786
	0.038543	-0.037840
	0.038543	-0.037873
	0.038543	-0.037895
	0.038543	-0.037887
	0.038543	-0.037912
	0.038543	-0.038006
	0.038543	-0.037974
	0.038543	-0.038037
	0.038543	-0.038081
	0.038543	-0.038092
	0.038543	-0.038184
	0.038543	-0.038214
	0.038543	-0.038216
	0.038543	-0.038244
	0.038543	-0.038290
	0.038543	-0.038323
	0.038543	-0.038376
	0.038543	-0.038392
	0.038543	-0.038430
	0.038543	-0.038449
	0.038543	-0.038481
	0.038543	-0.038539
	0.038543	-0.038621
	0.038543	-0.038605
	0.038543	-0.038685
	0.038543	-0.038719
	0.038543	-0.038742
	0.038543	-0.038781
	0.038543	-0.038857
	0.038543	-0.038878
	0.038543	-0.038926
	0.038543	-0.038907
	0.038543	-0.038904
	0.038543	-0.039005
	0.038543	-0.039034
	0.038543	-0.039040
	0.038543	-0.044416
	0.038543	-0.044450
	0.038543	-0.044456
	0.038543	-0.044474
	0.038543	-0.044533
	0.038543	-0.044585
	0.038543	-0.047765
	0.038543	-0.047795
	0.038543	-0.047840
	0.038543	-0.047865
	0.038543	-0.047903
	0.038543	-0.047904
	0.038543	-0.047921
	0.038543	-0.047949
	0.038543	-0.047970
	0.038543	-0.047953
	0.038543	-0.047985
	0.038543	-0.048020
	0.038543	-0.048046
	0.038543	-0.048093
	0.038543	-0.048141
	0.038543	-0.048132
	0.038543	-0.048139
	0.038543	-0.048181
	0.038543	-0.048185
	0.038543	-0.048212
