# Supplementary material for: Contact-free experimental determination of the static flexural spring constant of cantilever sensors using a microfluidic force tool
Source: Beilstein J Nanotechnol. 2016 Mar 30;7:492–500. doi: 10.3762/bjnano.7.43 (PMC4901535; doi:10.3762/bjnano.7.43)
Supplement: File 1 — Raw data of thermal noise spectra, cantilever deflection under fluid flow, and sensitivity values σ1. [file Beilstein_J_Nanotechnol-07-492-s001.zip › Supporting information and raw data/Tap525A-2-chip2_perpg2_h100_ch100_offset0_pvsPD.lvm]

	0.027481	-0.057197
	0.027481	-0.057151
	0.027481	-0.057153
	0.027481	-0.057161
	0.027481	-0.057156
	0.027481	-0.057144
	0.027481	-0.057162
	0.027481	-0.057163
	0.027481	-0.057154
	0.027481	-0.057168
	0.027481	-0.057192
	0.027481	-0.057225
	0.027481	-0.057208
	0.027481	-0.057194
	0.027481	-0.057224
	0.027481	-0.057244
	0.027481	-0.057241
	0.027481	-0.057218
	0.027481	-0.057250
	0.027481	-0.057254
	0.027481	-0.057246
	0.027481	-0.057293
	0.027481	-0.057280
	0.027481	-0.057300
	0.027481	-0.057245
	0.027481	-0.057303
	0.027481	-0.057303
	0.027481	-0.057312
	0.027481	-0.057300
	0.027481	-0.057303
	0.027481	-0.057282
	0.027481	-0.057278
	0.027481	-0.057291
	0.027481	-0.057290
	0.027481	-0.057302
	0.027481	-0.057317
	0.027481	-0.057302
	0.027481	-0.057299
	0.027481	-0.057332
	0.027481	-0.057343
	0.027481	-0.057366
	0.027481	-0.057336
	0.027481	-0.057361
	0.027481	-0.057381
	0.027481	-0.057375
	0.027481	-0.057372
	0.027481	-0.057359
	0.027481	-0.057350
	0.027481	-0.057389
	0.027481	-0.057348
	0.027481	-0.057364
	0.027481	-0.057385
	0.027481	-0.057373
	0.027481	-0.057417
	0.027481	-0.057417
	0.027481	-0.057403
	0.027481	-0.057413
	0.027481	-0.057373
	0.027481	-0.057411
	0.027481	-0.057445
	0.027481	-0.057426
	0.027481	-0.057408
	0.027481	-0.057447
	0.027481	-0.057433
	0.027481	-0.057458
	0.027481	-0.057446
	0.027481	-0.057440
	0.027481	-0.057456
	0.027481	-0.057442
	0.027481	-0.057408
	0.027481	-0.057379
	0.027481	-0.057369
	0.027481	-0.057379
	0.027481	-0.057383
	0.027481	-0.057363
	0.027481	-0.057377
	0.027481	-0.057379
	0.027481	-0.057392
	0.027481	-0.057392
	0.027481	-0.057380
	0.027481	-0.057386
	0.027481	-0.057392
	0.027481	-0.057402
	0.027481	-0.057389
	0.027481	-0.057397
	0.044803	-0.057051
	0.044803	-0.057017
	0.044803	-0.057052
	0.044803	-0.057065
	0.044803	-0.057064
	0.044803	-0.057057
	0.044803	-0.057066
	0.044803	-0.057029
	0.044803	-0.057015
	0.044803	-0.057028
	0.044803	-0.057048
	0.044803	-0.057046
	0.044803	-0.057015
	0.044803	-0.056983
	0.044803	-0.056993
	0.044803	-0.057011
	0.044803	-0.056949
	0.044803	-0.056981
	0.044803	-0.056961
	0.044803	-0.056954
	0.044803	-0.056943
	0.044803	-0.056951
	0.044803	-0.056966
	0.044803	-0.056958
	0.044803	-0.056951
	0.044803	-0.056922
	0.044803	-0.056939
	0.044803	-0.056912
	0.044803	-0.056938
	0.044803	-0.056927
	0.044803	-0.056917
	0.044803	-0.056918
	0.044803	-0.056934
	0.044803	-0.056928
	0.044803	-0.056933
	0.044803	-0.056912
	0.044803	-0.056880
	0.044803	-0.056876
	0.044803	-0.056870
	0.044803	-0.056884
	0.044803	-0.056869
	0.044803	-0.056858
	0.044803	-0.056877
	0.044803	-0.056846
	0.044803	-0.056864
	0.044803	-0.056849
	0.044803	-0.056835
	0.044803	-0.056839
	0.044803	-0.056826
	0.044803	-0.056820
	0.141408	-0.056628
	0.141408	-0.056659
	0.141408	-0.056631
	0.141408	-0.056578
	0.141408	-0.056579
	0.141408	-0.056546
	0.141408	-0.056476
	0.141408	-0.056481
	0.141408	-0.056476
	0.141408	-0.056507
	0.141408	-0.056501
	0.141408	-0.056488
	0.141408	-0.056518
	0.141408	-0.056565
	0.141408	-0.056549
	0.141408	-0.056507
	0.141408	-0.056460
	0.141408	-0.056417
	0.141408	-0.056400
	0.141408	-0.056398
	0.141408	-0.056378
	0.141408	-0.056353
	0.141408	-0.056384
	0.141408	-0.056350
	0.141408	-0.056345
	0.141408	-0.056384
	0.141408	-0.056349
	0.141408	-0.056323
	0.141408	-0.056345
	0.141408	-0.056365
	0.141408	-0.056329
	0.141408	-0.056358
	0.141408	-0.056366
	0.141408	-0.056338
	0.141408	-0.056305
	0.141408	-0.056295
	0.141408	-0.056253
	0.141408	-0.056286
	0.141408	-0.056238
	0.141408	-0.056245
	0.141408	-0.056217
	0.141408	-0.056227
	0.141408	-0.056206
	0.141408	-0.056211
	0.141408	-0.056213
	0.141408	-0.056205
	0.141408	-0.056246
	0.141408	-0.056231
	0.141408	-0.056237
	0.141408	-0.056228
	0.374825	-0.055328
	0.374825	-0.055286
	0.374825	-0.055293
	0.374825	-0.055257
	0.374825	-0.055229
	0.374825	-0.055180
	0.374825	-0.055109
	0.374825	-0.055094
	0.374825	-0.055115
	0.374825	-0.055068
	0.374825	-0.055080
	0.374825	-0.055038
	0.374825	-0.055057
	0.374825	-0.055066
	0.374825	-0.055110
	0.374825	-0.055093
	0.374825	-0.055105
	0.374825	-0.055031
	0.374825	-0.055019
	0.374825	-0.055019
	0.374825	-0.055037
	0.374825	-0.055061
	0.374825	-0.055015
	0.374825	-0.055064
	0.374825	-0.055092
	0.374825	-0.055074
	0.374825	-0.055031
	0.374825	-0.055020
	0.374825	-0.055024
	0.374825	-0.054972
	0.374825	-0.054994
	0.374825	-0.054949
	0.374825	-0.054934
	0.374825	-0.054938
	0.374825	-0.054898
	0.374825	-0.054873
	0.374825	-0.054857
	0.374825	-0.054847
	0.374825	-0.054837
	0.374825	-0.054822
	0.374825	-0.054824
	0.374825	-0.054837
	0.374825	-0.054866
	0.374825	-0.054864
	0.374825	-0.054858
	0.374825	-0.054898
	0.374825	-0.054980
	0.374825	-0.055018
	0.374825	-0.055012
	0.374825	-0.055029
	0.693317	-0.049986
	0.693317	-0.049975
	0.693317	-0.049951
	0.693317	-0.049939
	0.693317	-0.049958
	0.693317	-0.049905
	0.693317	-0.049883
	0.693317	-0.049847
	0.693317	-0.049818
	0.693317	-0.049810
	0.693317	-0.049801
	0.693317	-0.049753
	0.693317	-0.049728
	0.693317	-0.049684
	0.693317	-0.049643
	0.693317	-0.049658
	0.693317	-0.049645
	0.693317	-0.049571
	0.693317	-0.049544
	0.693317	-0.049512
	0.693317	-0.049485
	0.693317	-0.049448
	0.693317	-0.049430
	0.693317	-0.049413
	0.693317	-0.049388
	0.693317	-0.049377
	0.693317	-0.049357
	0.693317	-0.049342
	0.693317	-0.049341
	0.693317	-0.049297
	0.693317	-0.049301
	0.693317	-0.049225
	0.693317	-0.049184
	0.693317	-0.049164
	0.693317	-0.049139
	0.693317	-0.049135
	0.693317	-0.049112
	0.693317	-0.049130
	0.693317	-0.049124
	0.693317	-0.049096
	0.693317	-0.049082
	0.693317	-0.049105
	0.693317	-0.049035
	0.693317	-0.049027
	0.693317	-0.048977
	0.693317	-0.048949
	0.693317	-0.048976
	0.693317	-0.048965
	0.693317	-0.048965
	0.693317	-0.048972
	1.108504	-0.039860
	1.108504	-0.039829
	1.108504	-0.039821
	1.108504	-0.039770
	1.108504	-0.039770
	1.108504	-0.039785
	1.108504	-0.039737
	1.108504	-0.039743
	1.108504	-0.039693
	1.108504	-0.039721
	1.108504	-0.039678
	1.108504	-0.039675
	1.108504	-0.039655
	1.108504	-0.039669
	1.108504	-0.039607
	1.108504	-0.039607
	1.108504	-0.039620
	1.108504	-0.039582
	1.108504	-0.039558
	1.108504	-0.039514
	1.108504	-0.039506
	1.108504	-0.039501
	1.108504	-0.039531
	1.108504	-0.039512
	1.108504	-0.039491
	1.108504	-0.039480
	1.108504	-0.039470
	1.108504	-0.039435
	1.108504	-0.039411
	1.108504	-0.039395
	1.108504	-0.039361
	1.108504	-0.039380
	1.108504	-0.039382
	1.108504	-0.039387
	1.108504	-0.039401
	1.108504	-0.039379
	1.108504	-0.039386
	1.108504	-0.039394
	1.108504	-0.039357
	1.108504	-0.039365
	1.108504	-0.039340
	1.108504	-0.039397
	1.108504	-0.039348
	1.108504	-0.039343
	1.108504	-0.039351
	1.108504	-0.039318
	1.108504	-0.039306
	1.108504	-0.039283
	1.108504	-0.039270
	1.108504	-0.039279
	1.560997	-0.025796
	1.560997	-0.025763
	1.560997	-0.025687
	1.560997	-0.025708
	1.560997	-0.025627
	1.560997	-0.025676
	1.560997	-0.025630
	1.560997	-0.025621
	1.560997	-0.025620
	1.560997	-0.025593
	1.560997	-0.025606
	1.560997	-0.025554
	1.560997	-0.025569
	1.560997	-0.025489
	1.560997	-0.025529
	1.560997	-0.025483
	1.560997	-0.025480
	1.560997	-0.025444
	1.560997	-0.025442
	1.560997	-0.025464
	1.560997	-0.025444
	1.560997	-0.025469
	1.560997	-0.025422
	1.560997	-0.025430
	1.560997	-0.025397
	1.560997	-0.025423
	1.560997	-0.025401
	1.560997	-0.025434
	1.560997	-0.025433
	1.560997	-0.025430
	1.560997	-0.025471
	1.560997	-0.025405
	1.560997	-0.025441
	1.560997	-0.025392
	1.560997	-0.025418
	1.560997	-0.025398
	1.560997	-0.025419
	1.560997	-0.025413
	1.560997	-0.025409
	1.560997	-0.025445
	1.560997	-0.025382
	1.560997	-0.025389
	1.560997	-0.025358
	1.560997	-0.025409
	1.560997	-0.025331
	1.560997	-0.025302
	1.560997	-0.025298
	1.560997	-0.025260
	1.560997	-0.025297
	1.560997	-0.025224
	2.004701	-0.008695
	2.004701	-0.008719
	2.004701	-0.008785
	2.004701	-0.008687
	2.004701	-0.008645
	2.004701	-0.008652
	2.004701	-0.008631
	2.004701	-0.008534
	2.004701	-0.008511
	2.004701	-0.008563
	2.004701	-0.008558
	2.004701	-0.008620
	2.004701	-0.008626
	2.004701	-0.008549
	2.004701	-0.008578
	2.004701	-0.008533
	2.004701	-0.008636
	2.004701	-0.008562
	2.004701	-0.008782
	2.004701	-0.008775
	2.004701	-0.008696
	2.004701	-0.008686
	2.004701	-0.008677
	2.004701	-0.008687
	2.004701	-0.008622
	2.004701	-0.008669
	2.004701	-0.008629
	2.004701	-0.008614
	2.004701	-0.008664
	2.004701	-0.008671
	2.004701	-0.008584
	2.004701	-0.008629
	2.004701	-0.008616
	2.004701	-0.008567
	2.004701	-0.008585
	2.004701	-0.008595
	2.004701	-0.008598
	2.004701	-0.008545
	2.004701	-0.008595
	2.004701	-0.008590
	2.004701	-0.008469
	2.004701	-0.008524
	2.004701	-0.008502
	2.004701	-0.008461
	2.004701	-0.008443
	2.004701	-0.008493
	2.004701	-0.008465
	2.004701	-0.008446
	2.004701	-0.008498
	2.004701	-0.008515
	2.436487	0.012332
	2.436487	0.012258
	2.436487	0.012427
	2.436487	0.012344
	2.436487	0.012381
	2.436487	0.012428
	2.436487	0.012397
	2.436487	0.012478
	2.436487	0.012414
	2.436487	0.012506
	2.436487	0.012485
	2.436487	0.012413
	2.436487	0.012358
	2.436487	0.012464
	2.436487	0.012568
	2.436487	0.012492
	2.436487	0.012313
	2.436487	0.012580
	2.436487	0.012474
	2.436487	0.012680
	2.436487	0.012613
	2.436487	0.012535
	2.436487	0.012654
	2.436487	0.012514
	2.436487	0.012452
	2.436487	0.012452
	2.436487	0.012572
	2.436487	0.012524
	2.436487	0.012574
	2.436487	0.012632
	2.436487	0.012624
	2.436487	0.012555
	2.436487	0.012516
	2.436487	0.012457
	2.436487	0.012698
	2.436487	0.012617
	2.436487	0.012594
	2.436487	0.012709
	2.436487	0.012510
	2.436487	0.012631
	2.436487	0.012673
	2.436487	0.012814
	2.436487	0.012712
	2.436487	0.012751
	2.436487	0.012707
	2.436487	0.012635
	2.436487	0.012785
	2.436487	0.012820
	2.436487	0.012822
	2.436487	0.012741
	2.692324	0.026508
	2.692324	0.026544
	2.692324	0.026530
	2.692324	0.026597
	2.692324	0.026520
	2.692324	0.026627
	2.692324	0.026643
	2.692324	0.026659
	2.692324	0.026814
	2.692324	0.026629
	2.692324	0.026544
	2.692324	0.026784
	2.692324	0.026640
	2.692324	0.026768
	2.692324	0.026691
	2.692324	0.026706
	2.692324	0.026726
	2.692324	0.026855
	2.692324	0.026776
	2.692324	0.026650
	2.692324	0.026694
	2.692324	0.026752
	2.692324	0.026753
	2.692324	0.026738
	2.692324	0.026659
	2.692324	0.026792
	2.692324	0.026656
	2.692324	0.026732
	2.692324	0.026822
	2.692324	0.026856
	2.692324	0.026897
	2.692324	0.026769
	2.692324	0.026730
	2.692324	0.026812
	2.692324	0.026875
	2.692324	0.026760
	2.692324	0.026798
	2.692324	0.026890
	2.692324	0.026913
	2.692324	0.026975
	2.692324	0.026940
	2.692324	0.026844
	2.692324	0.026918
	2.692324	0.026866
	2.692324	0.026902
	2.692324	0.026848
	2.692324	0.026886
	2.692324	0.026854
	2.692324	0.026928
	2.692324	0.027018
	2.816478	0.033965
	2.816478	0.033853
	2.816478	0.033892
	2.816478	0.033941
	2.816478	0.033954
	2.816478	0.034068
	2.816478	0.033961
	2.816478	0.034118
	2.816478	0.034092
	2.816478	0.033945
	2.816478	0.034081
	2.816478	0.034006
	2.816478	0.034090
	2.816478	0.034077
	2.816478	0.034127
	2.816478	0.034062
	2.816478	0.034013
	2.816478	0.034212
	2.816478	0.034159
	2.816478	0.034039
	2.816478	0.034080
	2.816478	0.034163
	2.816478	0.034264
	2.816478	0.034164
	2.816478	0.034209
	2.816478	0.034295
	2.816478	0.034166
	2.816478	0.034146
	2.816478	0.034142
	2.816478	0.034247
	2.816478	0.034260
	2.816478	0.034430
	2.816478	0.034354
	2.816478	0.034272
	2.816478	0.034327
	2.816478	0.034383
	2.816478	0.034332
	2.816478	0.034337
	2.816478	0.034380
	2.816478	0.034329
	2.816478	0.034258
	2.816478	0.034410
	2.816478	0.034404
	2.816478	0.034313
	2.816478	0.034402
	2.816478	0.034432
	2.816478	0.034277
	2.816478	0.034408
	2.816478	0.034259
	2.816478	0.034246
	2.936977	0.041528
	2.936977	0.041512
	2.936977	0.041509
	2.936977	0.041629
	2.936977	0.041434
	2.936977	0.041528
	2.936977	0.041617
	2.936977	0.041519
	2.936977	0.041542
	2.936977	0.041458
	2.936977	0.041594
	2.936977	0.041580
	2.936977	0.041516
	2.936977	0.041533
	2.936977	0.041525
	2.936977	0.041512
	2.936977	0.041596
	2.936977	0.041550
	2.936977	0.041638
	2.936977	0.041725
	2.936977	0.041583
	2.936977	0.041747
	2.936977	0.041746
	2.936977	0.041721
	2.936977	0.041776
	2.936977	0.041735
	2.936977	0.041781
	2.936977	0.041697
	2.936977	0.041775
	2.936977	0.041888
	2.936977	0.041754
	2.936977	0.041817
	2.936977	0.041754
	2.936977	0.041812
	2.936977	0.041695
	2.936977	0.041721
	2.936977	0.041720
	2.936977	0.041809
	2.936977	0.041813
	2.936977	0.041699
	2.936977	0.041614
	2.936977	0.041694
	2.936977	0.041785
	2.936977	0.041694
	2.936977	0.041652
	2.936977	0.041653
	2.936977	0.041691
	2.936977	0.041747
	2.936977	0.041656
	2.936977	0.041707
	3.057584	0.049124
	3.057584	0.049159
	3.057584	0.049225
	3.057584	0.049249
	3.057584	0.049260
	3.057584	0.049264
	3.057584	0.049214
	3.057584	0.049255
	3.057584	0.049189
	3.057584	0.049259
	3.057584	0.049184
	3.057584	0.049395
	3.057584	0.049211
	3.057584	0.049310
	3.057584	0.049261
	3.057584	0.049339
	3.057584	0.049372
	3.057584	0.049491
	3.057584	0.049423
	3.057584	0.049391
	3.057584	0.049371
	3.057584	0.049389
	3.057584	0.049402
	3.057584	0.049375
	3.057584	0.049308
	3.057584	0.049395
	3.057584	0.049295
	3.057584	0.049276
	3.057584	0.049473
	3.057584	0.049410
	3.057584	0.049428
	3.057584	0.049523
	3.057584	0.049478
	3.057584	0.049557
	3.057584	0.049523
	3.057584	0.049512
	3.057584	0.049403
	3.057584	0.049647
	3.057584	0.049466
	3.057584	0.049516
	3.057584	0.049470
	3.057584	0.049507
	3.057584	0.049455
	3.057584	0.049456
	3.057584	0.049356
	3.057584	0.049491
	3.057584	0.049457
	3.057584	0.049392
	3.057584	0.049468
	3.057584	0.049560
	3.170197	0.056615
	3.170197	0.056658
	3.170197	0.056553
	3.170197	0.056615
	3.170197	0.056744
	3.170197	0.056771
	3.170197	0.056703
	3.170197	0.056754
	3.170197	0.056735
	3.170197	0.056626
	3.170197	0.056658
	3.170197	0.056681
	3.170197	0.056842
	3.170197	0.056873
	3.170197	0.056804
	3.170197	0.056863
	3.170197	0.056868
	3.170197	0.056886
	3.170197	0.056891
	3.170197	0.056864
	3.170197	0.056797
	3.170197	0.056970
	3.170197	0.056949
	3.170197	0.056872
	3.170197	0.056955
	3.170197	0.056930
	3.170197	0.056907
	3.170197	0.056911
	3.170197	0.056969
	3.170197	0.056818
	3.170197	0.056918
	3.170197	0.057018
	3.170197	0.056982
	3.170197	0.057011
	3.170197	0.057017
	3.170197	0.056982
	3.170197	0.057059
	3.170197	0.057024
	3.170197	0.056941
	3.170197	0.056963
	3.170197	0.057089
	3.170197	0.057070
	3.170197	0.057088
	3.170197	0.057048
	3.170197	0.056983
	3.170197	0.057047
	3.170197	0.057091
	3.170197	0.057070
	3.170197	0.057165
	3.170197	0.057145
	3.279912	0.064141
	3.279912	0.064224
	3.279912	0.064185
	3.279912	0.064251
	3.279912	0.064184
	3.279912	0.064128
	3.279912	0.064333
	3.279912	0.064234
	3.279912	0.064291
	3.279912	0.064279
	3.279912	0.064225
	3.279912	0.064277
	3.279912	0.064326
	3.279912	0.064388
	3.279912	0.064214
	3.279912	0.064371
	3.279912	0.064372
	3.279912	0.064322
	3.279912	0.064310
	3.279912	0.064448
	3.279912	0.064356
	3.279912	0.064344
	3.279912	0.064328
	3.279912	0.064331
	3.279912	0.064311
	3.279912	0.064404
	3.279912	0.064377
	3.279912	0.064306
	3.279912	0.064362
	3.279912	0.064398
	3.279912	0.064424
	3.279912	0.064468
	3.279912	0.064498
	3.279912	0.064441
	3.279912	0.064467
	3.279912	0.064482
	3.279912	0.064344
	3.279912	0.064427
	3.279912	0.064362
	3.279912	0.064465
	3.279912	0.064601
	3.279912	0.064402
	3.279912	0.064521
	3.279912	0.064305
	3.279912	0.064411
	3.279912	0.064435
	3.279912	0.064333
	3.279912	0.064421
	3.279912	0.064487
	3.279912	0.064332
	3.382370	0.071190
	3.382370	0.071018
	3.382370	0.071182
	3.382370	0.071076
	3.382370	0.071160
	3.382370	0.071106
	3.382370	0.071266
	3.382370	0.071109
	3.382370	0.071278
	3.382370	0.071187
	3.382370	0.071328
	3.382370	0.071187
	3.382370	0.071412
	3.382370	0.071306
	3.382370	0.071291
	3.382370	0.071248
	3.382370	0.071299
	3.382370	0.071291
	3.382370	0.071256
	3.382370	0.071273
	3.382370	0.071304
	3.382370	0.071241
	3.382370	0.071242
	3.382370	0.071199
	3.382370	0.071358
	3.382370	0.071206
	3.382370	0.071364
	3.382370	0.071316
	3.382370	0.071342
	3.382370	0.071287
	3.382370	0.071372
	3.382370	0.071538
	3.382370	0.071487
	3.382370	0.071356
	3.382370	0.071582
	3.382370	0.071390
	3.382370	0.071404
	3.382370	0.071411
	3.382370	0.071373
	3.382370	0.071465
	3.382370	0.071442
	3.382370	0.071432
	3.382370	0.071383
	3.382370	0.071431
	3.382370	0.071428
	3.382370	0.071332
	3.382370	0.071385
	3.382370	0.071410
	3.382370	0.071470
	3.382370	0.071322
	3.382370	0.071384
	3.382370	0.071384
	3.382370	0.071475
	3.382370	0.071367
	3.382370	0.071501
	3.382370	0.071496
	3.382370	0.071432
	3.382370	0.071419
	3.382370	0.071349
	3.382370	0.071527
	3.382370	0.071585
	3.382370	0.071503
	3.382370	0.071429
	3.382370	0.071398
	3.382370	0.071555
	3.382370	0.071510
	3.382370	0.071483
	3.382370	0.071510
	3.382370	0.071524
	3.382370	0.071411
	3.382370	0.071385
	3.382370	0.071577
	3.382370	0.071428
	3.382370	0.071643
	3.382370	0.071573
	3.382370	0.071511
	3.382370	0.071388
	3.382370	0.071577
	3.382370	0.071568
	3.382370	0.071559
	3.382370	0.071522
	3.382370	0.071517
	3.382370	0.071483
	3.382370	0.071502
	3.382370	0.071530
	3.382370	0.071530
	3.382370	0.071571
	3.382370	0.071668
	3.382370	0.071488
	3.382370	0.071485
	3.382370	0.071561
	3.382370	0.071499
	3.382370	0.071500
	3.382370	0.071531
	3.382370	0.071605
	3.382370	0.071464
	3.382370	0.071631
	3.382370	0.071593
	3.382370	0.071394
	3.382370	0.071566
	3.382370	0.071469
	3.382370	0.071630
	3.382370	0.071486
	3.382370	0.071628
	3.382370	0.071568
	3.382370	0.071562
	3.382370	0.071554
	3.382370	0.071650
	3.382370	0.071522
	3.382370	0.071649
	3.382370	0.071560
	3.382370	0.071619
	3.382370	0.071697
	3.382370	0.071699
	3.382370	0.071649
	3.382370	0.071659
	3.382370	0.071605
	3.382370	0.071711
	3.382370	0.071547
	3.382370	0.071693
	3.382370	0.071658
	3.382370	0.071621
	3.382370	0.071625
	3.382370	0.071726
	3.382370	0.071590
	3.382370	0.071636
	3.382370	0.071566
	3.382370	0.071629
	3.382370	0.071701
	3.382370	0.071712
	3.382370	0.071618
	3.382370	0.071820
	3.382370	0.071637
	3.382370	0.071669
	3.382370	0.071728
	3.382370	0.071788
	3.382370	0.071795
	3.382370	0.071890
	3.382370	0.071803
	3.382370	0.071850
	3.382370	0.071556
	3.382370	0.071924
	3.382370	0.071852
	3.382370	0.071879
	3.382370	0.071780
	3.382370	0.071749
	3.382370	0.071740
	3.382370	0.071647
	3.382370	0.071844
	3.382370	0.071692
	3.382370	0.071841
	3.382370	0.071788
	3.382370	0.071830
	3.382370	0.071805
	3.382370	0.071795
	3.382370	0.071721
	3.382370	0.071931
	3.382370	0.071836
	3.382370	0.071817
	3.382370	0.071679
	3.382370	0.071858
	3.382370	0.071750
	3.382370	0.071793
	3.382370	0.071892
	3.382370	0.071746
	3.382370	0.071949
	3.382370	0.071927
	3.382370	0.071955
	3.382370	0.071825
	3.382370	0.071829
	3.382370	0.071993
	3.382370	0.071875
	3.382370	0.071870
	3.382370	0.071913
	3.382370	0.071918
	3.382370	0.071943
	3.382370	0.071924
	3.382370	0.071918
	3.382370	0.071900
	3.382370	0.071960
	3.382370	0.072111
	3.382370	0.071943
	3.382370	0.072010
	3.382370	0.071937
	3.382370	0.072020
	3.382370	0.072008
	3.382370	0.072129
	3.382370	0.072014
	3.382370	0.072056
	3.382370	0.071979
	3.382370	0.072113
	3.382370	0.072075
	3.382370	0.072045
	3.382370	0.071994
	3.382370	0.071966
	3.382370	0.071916
	3.382370	0.071921
	3.382370	0.071971
	3.382370	0.072080
	3.382370	0.072112
	3.382370	0.072137
	3.382370	0.072175
	3.382370	0.071975
	3.382370	0.072090
	3.382370	0.072237
	3.382370	0.072115
	3.382370	0.072174
	3.382370	0.072249
	3.382370	0.072121
	3.382370	0.071919
	3.382370	0.072098
	3.382370	0.072195
	3.382370	0.072243
	3.382370	0.072166
	3.382370	0.072124
	3.382370	0.072160
	3.382370	0.072154
	3.382370	0.072266
	3.382370	0.072282
	3.382370	0.072277
	3.382370	0.072281
	3.382370	0.072130
	3.382370	0.072160
	3.382370	0.072266
	3.382370	0.072297
	3.382370	0.072220
	3.382370	0.072258
	3.382370	0.072143
	3.382370	0.072215
	3.382370	0.072214
	3.382370	0.072289
	3.382370	0.072164
	3.382370	0.072085
	3.382370	0.072222
	3.382370	0.072365
	3.382370	0.072278
	3.382370	0.072261
	3.382370	0.072255
	3.382370	0.072274
	3.382370	0.072333
	3.382370	0.072327
	3.382370	0.072379
	3.382370	0.072268
	3.382370	0.072262
	3.382370	0.072149
	3.382370	0.072384
	3.382370	0.072224
	3.382370	0.072276
	3.382370	0.072119
	3.382370	0.072150
	3.382370	0.072216
	3.382370	0.072310
	3.382370	0.072158
	3.382370	0.072451
	3.382370	0.072308
	3.382370	0.072169
	3.382370	0.072217
	3.382370	0.072248
	3.382370	0.072238
	3.382370	0.072208
	3.382370	0.072256
	3.382370	0.072187
	3.382370	0.072181
	3.382370	0.072208
	3.382370	0.072206
	3.382370	0.072145
	3.382370	0.072169
	3.382370	0.072200
	3.382370	0.072127
	3.382370	0.072370
	3.382370	0.072229
	3.382370	0.072310
	3.382370	0.072256
	3.382370	0.072202
	3.382370	0.072300
	3.382370	0.072314
	3.382370	0.072303
	3.382370	0.072274
	3.382370	0.072259
	3.382370	0.072254
	3.382370	0.072313
	3.382370	0.072213
	3.382370	0.072365
	3.529936	0.082505
	3.529936	0.082624
	3.529936	0.082590
	3.529936	0.082592
	3.529936	0.082547
	3.529936	0.082524
	3.529936	0.082587
	3.529936	0.082756
	3.529936	0.082658
	3.529936	0.082582
	3.529936	0.082620
	3.529936	0.082667
	3.529936	0.082743
	3.529936	0.082602
	3.529936	0.082755
	3.529936	0.082712
	3.529936	0.082561
	3.529936	0.082797
	3.529936	0.082712
	3.529936	0.082614
	3.529936	0.082688
	3.529936	0.082750
	3.529936	0.082676
	3.529936	0.082811
	3.529936	0.082857
	3.529936	0.082830
	3.529936	0.082755
	3.529936	0.082869
	3.529936	0.082825
	3.529936	0.082883
	3.529936	0.082829
	3.529936	0.082822
	3.529936	0.082892
	3.529936	0.082821
	3.529936	0.082819
	3.529936	0.082805
	3.529936	0.082996
	3.529936	0.082850
	3.529936	0.082977
	3.529936	0.082982
	3.529936	0.082695
	3.529936	0.082705
	3.529936	0.082888
	3.529936	0.082882
	3.529936	0.082762
	3.529936	0.082925
	3.529936	0.082995
	3.529936	0.082881
	3.529936	0.082762
	3.529936	0.082786
	3.379424	0.073870
	3.379424	0.073877
	3.379424	0.073904
	3.379424	0.073991
	3.379424	0.074057
	3.379424	0.074047
	3.379424	0.074072
	3.379424	0.074100
	3.379424	0.074222
	3.379424	0.074139
	3.379424	0.074117
	3.379424	0.074128
	3.379424	0.074135
	3.379424	0.074231
	3.379424	0.074081
	3.379424	0.074058
	3.379424	0.074114
	3.379424	0.074306
	3.379424	0.074162
	3.379424	0.074258
	3.379424	0.074274
	3.379424	0.074246
	3.379424	0.074287
	3.379424	0.074321
	3.379424	0.074253
	3.379424	0.074237
	3.379424	0.074242
	3.379424	0.074334
	3.379424	0.074345
	3.379424	0.074350
	3.379424	0.074202
	3.379424	0.074212
	3.379424	0.074374
	3.379424	0.074378
	3.379424	0.074367
	3.379424	0.074516
	3.379424	0.074340
	3.379424	0.074409
	3.379424	0.074378
	3.379424	0.074357
	3.379424	0.074387
	3.379424	0.074234
	3.379424	0.074469
	3.379424	0.074394
	3.379424	0.074469
	3.379424	0.074304
	3.379424	0.074344
	3.379424	0.074368
	3.379424	0.074457
	3.379424	0.074467
	3.246882	0.066103
	3.246882	0.066049
	3.246882	0.066001
	3.246882	0.066126
	3.246882	0.066096
	3.246882	0.065893
	3.246882	0.066030
	3.246882	0.066112
	3.246882	0.066011
	3.246882	0.066111
	3.246882	0.065969
	3.246882	0.066156
	3.246882	0.066237
	3.246882	0.066266
	3.246882	0.066130
	3.246882	0.066229
	3.246882	0.066210
	3.246882	0.066216
	3.246882	0.066235
	3.246882	0.066285
	3.246882	0.066500
	3.246882	0.066279
	3.246882	0.066223
	3.246882	0.066450
	3.246882	0.066319
	3.246882	0.066273
	3.246882	0.066376
	3.246882	0.066429
	3.246882	0.066237
	3.246882	0.066399
	3.246882	0.066523
	3.246882	0.066434
	3.246882	0.066419
	3.246882	0.066425
	3.246882	0.066388
	3.246882	0.066486
	3.246882	0.066628
	3.246882	0.066494
	3.246882	0.066377
	3.246882	0.066511
	3.246882	0.066420
	3.246882	0.066492
	3.246882	0.066473
	3.246882	0.066490
	3.246882	0.066518
	3.246882	0.066542
	3.246882	0.066574
	3.246882	0.066520
	3.246882	0.066421
	3.246882	0.066609
	3.104953	0.057448
	3.104953	0.057474
	3.104953	0.057422
	3.104953	0.057420
	3.104953	0.057521
	3.104953	0.057547
	3.104953	0.057495
	3.104953	0.057495
	3.104953	0.057433
	3.104953	0.057564
	3.104953	0.057476
	3.104953	0.057525
	3.104953	0.057431
	3.104953	0.057554
	3.104953	0.057569
	3.104953	0.057470
	3.104953	0.057639
	3.104953	0.057632
	3.104953	0.057590
	3.104953	0.057591
	3.104953	0.057635
	3.104953	0.057669
	3.104953	0.057602
	3.104953	0.057643
	3.104953	0.057564
	3.104953	0.057608
	3.104953	0.057572
	3.104953	0.057602
	3.104953	0.057668
	3.104953	0.057503
	3.104953	0.057769
	3.104953	0.057726
	3.104953	0.057683
	3.104953	0.057600
	3.104953	0.057617
	3.104953	0.057610
	3.104953	0.057698
	3.104953	0.057617
	3.104953	0.057764
	3.104953	0.057664
	3.104953	0.057660
	3.104953	0.057665
	3.104953	0.057705
	3.104953	0.057625
	3.104953	0.057738
	3.104953	0.057654
	3.104953	0.057690
	3.104953	0.057701
	3.104953	0.057733
	3.104953	0.057696
	2.955478	0.048394
	2.955478	0.048370
	2.955478	0.048488
	2.955478	0.048488
	2.955478	0.048592
	2.955478	0.048660
	2.955478	0.048650
	2.955478	0.048660
	2.955478	0.048598
	2.955478	0.048570
	2.955478	0.048517
	2.955478	0.048593
	2.955478	0.048488
	2.955478	0.048579
	2.955478	0.048569
	2.955478	0.048643
	2.955478	0.048676
	2.955478	0.048631
	2.955478	0.048628
	2.955478	0.048593
	2.955478	0.048684
	2.955478	0.048753
	2.955478	0.048673
	2.955478	0.048736
	2.955478	0.048655
	2.955478	0.048764
	2.955478	0.048645
	2.955478	0.048595
	2.955478	0.048663
	2.955478	0.048791
	2.955478	0.048581
	2.955478	0.048635
	2.955478	0.048747
	2.955478	0.048573
	2.955478	0.048576
	2.955478	0.048696
	2.955478	0.048678
	2.955478	0.048676
	2.955478	0.048610
	2.955478	0.048644
	2.955478	0.048651
	2.955478	0.048745
	2.955478	0.048710
	2.955478	0.048754
	2.955478	0.048725
	2.955478	0.048653
	2.955478	0.048671
	2.955478	0.048801
	2.955478	0.048604
	2.955478	0.048782
	2.791849	0.039292
	2.791849	0.039205
	2.791849	0.039176
	2.791849	0.039230
	2.791849	0.039217
	2.791849	0.039256
	2.791849	0.039190
	2.791849	0.039250
	2.791849	0.039197
	2.791849	0.039276
	2.791849	0.039319
	2.791849	0.039190
	2.791849	0.039275
	2.791849	0.039346
	2.791849	0.039290
	2.791849	0.039268
	2.791849	0.039161
	2.791849	0.039353
	2.791849	0.039327
	2.791849	0.039183
	2.791849	0.039265
	2.791849	0.039214
	2.791849	0.039212
	2.791849	0.039178
	2.791849	0.039221
	2.791849	0.039159
	2.791849	0.039286
	2.791849	0.039328
	2.791849	0.039249
	2.791849	0.039359
	2.791849	0.039204
	2.791849	0.039163
	2.791849	0.039242
	2.791849	0.039331
	2.791849	0.039262
	2.791849	0.039271
	2.791849	0.039263
	2.791849	0.039333
	2.791849	0.039316
	2.791849	0.039495
	2.791849	0.039300
	2.791849	0.039279
	2.791849	0.039384
	2.791849	0.039244
	2.791849	0.039286
	2.791849	0.039223
	2.791849	0.039240
	2.791849	0.039371
	2.791849	0.039300
	2.791849	0.039335
	2.614398	0.029437
	2.614398	0.029549
	2.614398	0.029500
	2.614398	0.029447
	2.614398	0.029742
	2.614398	0.029439
	2.614398	0.029511
	2.614398	0.029580
	2.614398	0.029647
	2.614398	0.029539
	2.614398	0.029671
	2.614398	0.029629
	2.614398	0.029697
	2.614398	0.029596
	2.614398	0.029687
	2.614398	0.029604
	2.614398	0.029816
	2.614398	0.029821
	2.614398	0.029744
	2.614398	0.029664
	2.614398	0.029644
	2.614398	0.029809
	2.614398	0.029682
	2.614398	0.029770
	2.614398	0.029719
	2.614398	0.029559
	2.614398	0.029649
	2.614398	0.029527
	2.614398	0.029575
	2.614398	0.029652
	2.614398	0.029601
	2.614398	0.029671
	2.614398	0.029698
	2.614398	0.029734
	2.614398	0.029766
	2.614398	0.029659
	2.614398	0.029777
	2.614398	0.029654
	2.614398	0.029735
	2.614398	0.029647
	2.614398	0.029656
	2.614398	0.029608
	2.614398	0.029637
	2.614398	0.029675
	2.614398	0.029715
	2.614398	0.029851
	2.614398	0.029590
	2.614398	0.029664
	2.614398	0.029664
	2.614398	0.029804
	2.239931	0.010559
	2.239931	0.010227
	2.239931	0.009998
	2.239931	0.010290
	2.239931	0.010449
	2.239931	0.010715
	2.239931	0.010325
	2.239931	0.010499
	2.239931	0.010446
	2.239931	0.009970
	2.239931	0.010332
	2.239931	0.010276
	2.239931	0.010276
	2.239931	0.010438
	2.239931	0.010715
	2.239931	0.010181
	2.239931	0.010592
	2.239931	0.010157
	2.239931	0.010389
	2.239931	0.010176
	2.239931	0.010291
	2.239931	0.010788
	2.239931	0.010586
	2.239931	0.010088
	2.239931	0.010669
	2.239931	0.010353
	2.239931	0.010612
	2.239931	0.010821
	2.239931	0.010711
	2.239931	0.010470
	2.239931	0.010394
	2.239931	0.010332
	2.239931	0.009959
	2.239931	0.010241
	2.239931	0.010165
	2.239931	0.010332
	2.239931	0.010400
	2.239931	0.010566
	2.239931	0.010329
	2.239931	0.010265
	2.239931	0.010720
	2.239931	0.010162
	2.239931	0.010293
	2.239931	0.010517
	2.239931	0.010673
	2.239931	0.010207
	2.239931	0.010600
	2.239931	0.010059
	2.239931	0.010769
	2.239931	0.010484
	1.646861	-0.013420
	1.646861	-0.013440
	1.646861	-0.013436
	1.646861	-0.013419
	1.646861	-0.013385
	1.646861	-0.013438
	1.646861	-0.013398
	1.646861	-0.013445
	1.646861	-0.013465
	1.646861	-0.013397
	1.646861	-0.013421
	1.646861	-0.013396
	1.646861	-0.013425
	1.646861	-0.013409
	1.646861	-0.013411
	1.646861	-0.013389
	1.646861	-0.013372
	1.646861	-0.013370
	1.646861	-0.013343
	1.646861	-0.013342
	1.646861	-0.013374
	1.646861	-0.013370
	1.646861	-0.013365
	1.646861	-0.013401
	1.646861	-0.013336
	1.646861	-0.013373
	1.646861	-0.013333
	1.646861	-0.013359
	1.646861	-0.013361
	1.646861	-0.013303
	1.646861	-0.013355
	1.646861	-0.013351
	1.646861	-0.013348
	1.646861	-0.013373
	1.646861	-0.013304
	1.646861	-0.013365
	1.646861	-0.013366
	1.646861	-0.013333
	1.646861	-0.013381
	1.646861	-0.013365
	1.646861	-0.013323
	1.646861	-0.013348
	1.646861	-0.013322
	1.646861	-0.013380
	1.646861	-0.013350
	1.646861	-0.013358
	1.646861	-0.013381
	1.646861	-0.013356
	1.646861	-0.013369
	1.646861	-0.013346
	1.066177	-0.030245
	1.066177	-0.030216
	1.066177	-0.030216
	1.066177	-0.030267
	1.066177	-0.030248
	1.066177	-0.030226
	1.066177	-0.030250
	1.066177	-0.030227
	1.066177	-0.030209
	1.066177	-0.030208
	1.066177	-0.030189
	1.066177	-0.030203
	1.066177	-0.030206
	1.066177	-0.030187
	1.066177	-0.030217
	1.066177	-0.030180
	1.066177	-0.030193
	1.066177	-0.030224
	1.066177	-0.030201
	1.066177	-0.030172
	1.066177	-0.030163
	1.066177	-0.030184
	1.066177	-0.030167
	1.066177	-0.030210
	1.066177	-0.030232
	1.066177	-0.030201
	1.066177	-0.030247
	1.066177	-0.030217
	1.066177	-0.030229
	1.066177	-0.030221
	1.066177	-0.030231
	1.066177	-0.030190
	1.066177	-0.030181
	1.066177	-0.030163
	1.066177	-0.030187
	1.066177	-0.030193
	1.066177	-0.030177
	1.066177	-0.030227
	1.066177	-0.030155
	1.066177	-0.030164
	1.066177	-0.030160
	1.066177	-0.030172
	1.066177	-0.030176
	1.066177	-0.030174
	1.066177	-0.030163
	1.066177	-0.030146
	1.066177	-0.030171
	1.066177	-0.030133
	1.066177	-0.030148
	1.066177	-0.030149
	0.556822	-0.040202
	0.556822	-0.040214
	0.556822	-0.040223
	0.556822	-0.040226
	0.556822	-0.040200
	0.556822	-0.040189
	0.556822	-0.040212
	0.556822	-0.040176
	0.556822	-0.040193
	0.556822	-0.040208
	0.556822	-0.040207
	0.556822	-0.040235
	0.556822	-0.040235
	0.556822	-0.040188
	0.556822	-0.040188
	0.556822	-0.040182
	0.556822	-0.040197
	0.556822	-0.040199
	0.556822	-0.040236
	0.556822	-0.040221
	0.556822	-0.040221
	0.556822	-0.040206
	0.556822	-0.040178
	0.556822	-0.040161
	0.556822	-0.040194
	0.556822	-0.040183
	0.556822	-0.040211
	0.556822	-0.040187
	0.556822	-0.040180
	0.556822	-0.040176
	0.556822	-0.040188
	0.556822	-0.040170
	0.556822	-0.040197
	0.556822	-0.040195
	0.556822	-0.040173
	0.556822	-0.040199
	0.556822	-0.040167
	0.556822	-0.040185
	0.556822	-0.040209
	0.556822	-0.040246
	0.556822	-0.040202
	0.556822	-0.040216
	0.556822	-0.040226
	0.556822	-0.040229
	0.556822	-0.040235
	0.556822	-0.040223
	0.556822	-0.040223
	0.556822	-0.040234
	0.556822	-0.040199
	0.556822	-0.040210
	0.189860	-0.042470
	0.189860	-0.042444
	0.189860	-0.042438
	0.189860	-0.042439
	0.189860	-0.042458
	0.189860	-0.042446
	0.189860	-0.042434
	0.189860	-0.042426
	0.189860	-0.042435
	0.189860	-0.042434
	0.189860	-0.042443
	0.189860	-0.042448
	0.189860	-0.042428
	0.189860	-0.042460
	0.189860	-0.042439
	0.189860	-0.042432
	0.189860	-0.042408
	0.189860	-0.042396
	0.189860	-0.042399
	0.189860	-0.042400
	0.189860	-0.042427
	0.189860	-0.042452
	0.189860	-0.042437
	0.189860	-0.042420
	0.189860	-0.042424
	0.189860	-0.042452
	0.189860	-0.042459
	0.189860	-0.042453
	0.189860	-0.042475
	0.189860	-0.042473
	0.189860	-0.042455
	0.189860	-0.042473
	0.189860	-0.042446
	0.189860	-0.042470
	0.189860	-0.042478
	0.189860	-0.042510
	0.189860	-0.042447
	0.189860	-0.042452
	0.189860	-0.042441
	0.189860	-0.042478
	0.189860	-0.042457
	0.189860	-0.042423
	0.189860	-0.042427
	0.189860	-0.042397
	0.189860	-0.042402
	0.189860	-0.042407
	0.189860	-0.042400
	0.189860	-0.042407
	0.189860	-0.042437
	0.189860	-0.042436
	0.046510	-0.044441
	0.046510	-0.044428
	0.046510	-0.044464
	0.046510	-0.044481
	0.046510	-0.044488
	0.046510	-0.044514
	0.046510	-0.044527
	0.046510	-0.044565
	0.046510	-0.044546
	0.046510	-0.044602
	0.046510	-0.044614
	0.046510	-0.044628
	0.046510	-0.044627
	0.046510	-0.044648
	0.046510	-0.044699
	0.046510	-0.044717
	0.046510	-0.044740
	0.046510	-0.044755
	0.046510	-0.044768
	0.046510	-0.044778
	0.046510	-0.044794
	0.046510	-0.044845
	0.046510	-0.044813
	0.046510	-0.044826
	0.046510	-0.044838
	0.046510	-0.044863
	0.046510	-0.044870
	0.046510	-0.044899
	0.046510	-0.044917
	0.046510	-0.044937
	0.046510	-0.044942
	0.046510	-0.044925
	0.046510	-0.044949
	0.046510	-0.044949
	0.046510	-0.044968
	0.046510	-0.045004
	0.046510	-0.045018
	0.046510	-0.045069
	0.046510	-0.045071
	0.046510	-0.045059
	0.046510	-0.045090
	0.046510	-0.045129
	0.046510	-0.045139
	0.046510	-0.045187
	0.046510	-0.045231
	0.046510	-0.045226
	0.046510	-0.045238
	0.046510	-0.045235
	0.046510	-0.045236
	0.046510	-0.045272
	0.029463	-0.047040
	0.029463	-0.047056
	0.029463	-0.047118
	0.029463	-0.047124
	0.029463	-0.047127
	0.029463	-0.047147
	0.029463	-0.047130
	0.029463	-0.047154
	0.029463	-0.047166
	0.029463	-0.047197
	0.029463	-0.047215
	0.029463	-0.047242
	0.029463	-0.047247
	0.029463	-0.047283
	0.029463	-0.047307
	0.029463	-0.047337
	0.029463	-0.047354
	0.029463	-0.047373
	0.029463	-0.047400
	0.029463	-0.047429
	0.029463	-0.047443
	0.029463	-0.047456
	0.029463	-0.047465
	0.029463	-0.047511
	0.029463	-0.047525
	0.029463	-0.047500
	0.029463	-0.047536
	0.029463	-0.047546
	0.029463	-0.047576
	0.029463	-0.047576
	0.029463	-0.047573
	0.029463	-0.047630
	0.029463	-0.047629
	0.029463	-0.047646
	0.029463	-0.047687
	0.029463	-0.047685
	0.029463	-0.047698
	0.029463	-0.047699
	0.029463	-0.047707
	0.029463	-0.047716
	0.029463	-0.047724
	0.029463	-0.047723
	0.029463	-0.047761
	0.029463	-0.047798
	0.029463	-0.047830
	0.029463	-0.047851
	0.029463	-0.047863
	0.029463	-0.047878
	0.029463	-0.047941
	0.029463	-0.047954
	0.029463	-0.047966
	0.029463	-0.047981
	0.029463	-0.048016
	0.029463	-0.048046
	0.029463	-0.048052
	0.029463	-0.048053
	0.029463	-0.048047
	0.029463	-0.048049
	0.029463	-0.048001
	0.029463	-0.048130
	0.029463	-0.048149
	0.029463	-0.048136
	0.029463	-0.048207
	0.029463	-0.048228
	0.029463	-0.048255
	0.029463	-0.048258
	0.029463	-0.048270
	0.029463	-0.048259
	0.029463	-0.048250
	0.029463	-0.048246
	0.029463	-0.048321
	0.029463	-0.048317
	0.029463	-0.048343
	0.029463	-0.048333
	0.029463	-0.048370
	0.029463	-0.048373
	0.029463	-0.048384
	0.029463	-0.048403
	0.029463	-0.048451
	0.029463	-0.048462
	0.029463	-0.048479
	0.029463	-0.048508
	0.029463	-0.048511
	0.029463	-0.048551
	0.029463	-0.048534
	0.029463	-0.048537
	0.029463	-0.048558
	0.029463	-0.048573
	0.029463	-0.048597
	0.029463	-0.048596
	0.029463	-0.048625
	0.029463	-0.048622
	0.029463	-0.048689
	0.029463	-0.048713
	0.029463	-0.048715
	0.029463	-0.048738
	0.029463	-0.048757
	0.029463	-0.048789
	0.029463	-0.048795
	0.029463	-0.048798
	0.029463	-0.048798
	0.029463	-0.048842
	0.029463	-0.048853
	0.029463	-0.048869
	0.029463	-0.048888
	0.029463	-0.048885
	0.029463	-0.048907
	0.029463	-0.048946
	0.029463	-0.048941
	0.029463	-0.048951
	0.029463	-0.048972
	0.029463	-0.048981
	0.029463	-0.048994
	0.029463	-0.049054
	0.029463	-0.049073
	0.029463	-0.049065
	0.029463	-0.049093
	0.029463	-0.049093
	0.029463	-0.049081
	0.029463	-0.049107
	0.029463	-0.049118
	0.029463	-0.049129
	0.029463	-0.049118
	0.029463	-0.049171
	0.029463	-0.049179
	0.029463	-0.049187
	0.029463	-0.049196
	0.029463	-0.049159
	0.029463	-0.049162
	0.029463	-0.049196
	0.029463	-0.049190
	0.029463	-0.049228
	0.029463	-0.049233
	0.029463	-0.049239
	0.029463	-0.049290
	0.029463	-0.049329
	0.029463	-0.049331
	0.029463	-0.049291
	0.029463	-0.049305
	0.031048	-0.049780
	0.031048	-0.049783
	0.031048	-0.049784
	0.031048	-0.049762
	0.031048	-0.049748
	0.031048	-0.049805
	0.031048	-0.049803
	0.031048	-0.049825
	0.031048	-0.049824
	0.031048	-0.049816
	0.031048	-0.049844
	0.031048	-0.049845
	0.031048	-0.049822
	0.031048	-0.049847
	0.031048	-0.049853
	0.031048	-0.049856
	0.031048	-0.049858
	0.031048	-0.049864
	0.031048	-0.049917
	0.031048	-0.049982
	0.031048	-0.049955
	0.031048	-0.049954
	0.031048	-0.049958
	0.031048	-0.050003
	0.031048	-0.049995
	0.031048	-0.049998
	0.031048	-0.049969
	0.031048	-0.049992
	0.031048	-0.050001
	0.031048	-0.050014
	0.031048	-0.050036
	0.031048	-0.050066
	0.031048	-0.050065
	0.031048	-0.050076
	0.031048	-0.050092
	0.031048	-0.050069
	0.031048	-0.050076
	0.031048	-0.050139
	0.031048	-0.050120
	0.031048	-0.050177
	0.031048	-0.050209
	0.031048	-0.050217
	0.031048	-0.050177
	0.031048	-0.050186
	0.031048	-0.050217
	0.031048	-0.050221
	0.031048	-0.050219
	0.031048	-0.050244
	0.031048	-0.050268
	0.031048	-0.050274
	0.030500	-0.050764
	0.030500	-0.050778
	0.030500	-0.050764
	0.030500	-0.050756
	0.030500	-0.050770
	0.030500	-0.050752
	0.030500	-0.050798
	0.030500	-0.050797
	0.030500	-0.050813
	0.030500	-0.050843
	0.030500	-0.050827
	0.030500	-0.050859
	0.030500	-0.050844
	0.030500	-0.050876
	0.030500	-0.050864
	0.030500	-0.050890
	0.030500	-0.050934
	0.030500	-0.050945
	0.030500	-0.050922
	0.030500	-0.050945
	0.030500	-0.050936
	0.030500	-0.050987
	0.030500	-0.051015
	0.030500	-0.051007
	0.030500	-0.051045
	0.030500	-0.051056
	0.030500	-0.051026
	0.030500	-0.051060
	0.030500	-0.051060
	0.030500	-0.051038
	0.030500	-0.051060
	0.030500	-0.051080
	0.030500	-0.051090
	0.030500	-0.051086
	0.030500	-0.051130
	0.030500	-0.051117
	0.030500	-0.051150
	0.030500	-0.051186
	0.030500	-0.051184
	0.030500	-0.051164
	0.030500	-0.051182
	0.030500	-0.051220
	0.030500	-0.051220
	0.030500	-0.051211
	0.030500	-0.051240
	0.030500	-0.051242
	0.030500	-0.051249
	0.030500	-0.051229
	0.030500	-0.051229
	0.030500	-0.051287
	0.030061	-0.051632
	0.030061	-0.051604
	0.030061	-0.051616
	0.030061	-0.051638
	0.030061	-0.051633
	0.030061	-0.051675
	0.030061	-0.051660
	0.030061	-0.051669
	0.030061	-0.051669
	0.030061	-0.051674
	0.030061	-0.051699
	0.030061	-0.051707
	0.030061	-0.051712
	0.030061	-0.051740
	0.030061	-0.051726
	0.030061	-0.051761
	0.030061	-0.051797
	0.030061	-0.051768
	0.030061	-0.051793
	0.030061	-0.051802
	0.030061	-0.051820
	0.030061	-0.051812
	0.030061	-0.051841
	0.030061	-0.051847
	0.030061	-0.051865
	0.030061	-0.051865
	0.030061	-0.051843
	0.030061	-0.051854
	0.030061	-0.051867
	0.030061	-0.051864
	0.030061	-0.051855
	0.030061	-0.051841
	0.030061	-0.051900
	0.030061	-0.051903
	0.030061	-0.051916
	0.030061	-0.051933
	0.030061	-0.051953
	0.030061	-0.051988
	0.030061	-0.052034
	0.030061	-0.052013
	0.030061	-0.052007
	0.030061	-0.052039
	0.030061	-0.052011
[truncated: 214 more rows]
